# Supplementary material for: The BTB-ZF gene Bm-mamo regulates pigmentation in silkworm caterpillars
Source: eLife. 2024 Apr 8;12:RP90795. doi: 10.7554/eLife.90795 (PMC11001300; doi:10.7554/eLife.90795)
Supplement: Figure 2—figure supplement 2—source data 1. [file elife-90795-fig2-figsupp2-data1.xlsx]

## Sheet: Sheet1
Figure 2-figure supplement 2-source data 1
Name	sequences
>Bm-mamo-L [PP426589]	ATGGGAAGTGAGCACTATTGCCTAAGGTGGAACAATCATCAGAGCAACCTGCTGGGAGTATTCAGCCAGTTGCTGCACGACGAAAGTTTGGTAGACGTCACACTTGCTTGTGCCGAAGGTGCATCCATCAGAGCGCACAAGGTAGTTCTATCTGCGTGTTCTTCGTACTTCCGTTCGCTGTTCGTGGATCATCCTTCACGTCACCCTATCGTGATTCTAAAAGACGTCGGCTTAGAAGAGCTACGTACTCTCGTCGACTTCATGTACAAAGGCGAGGTCAACGTCCAGTACTGTCAGCTGCCTGCACTCCTCAGAACTGCTGAAAGCCTTCAGGTCAAAGGATTAGCTGAAATGACGACTTTAAACGCAGCCGGTATCGAAACAAGAAGTGTTTCGGAG…
>Bm-mamo-S [PP426590]	ATGGGAAGTGAGCACTATTGCCTAAGGTGGAACAATCATCAGAGCAACCTGCTGGGAGTATTCAGCCAGTTGCTGCACGACGAAAGTTTGGTAGACGTCACACTTGCTTGTGCCGAAGGTGCATCCATCAGAGCGCACAAGGTAGTTCTATCTGCGTGTTCTTCGTACTTCCGTTCGCTGTTCGTGGATCATCCTTCACGTCACCCTATCGTGATTCTAAAAGACGTCGGCTTAGAAGAGCTACGTACTCTCGTCGACTTCATGTACAAAGGCGAGGTCAACGTCCAGTACTGTCAGCTGCCTGCACTCCTCAGAACTGCTGAAAGCCTTCAGGTCAAAGGATTAGCTGAAATGACGACTTTAAACGCAGCCGGTATCGAAACAAGAAGTGTTTCGGAG…
