# Supplementary material for: The BTB-ZF gene Bm-mamo regulates pigmentation in silkworm caterpillars
Source: eLife. 2024 Apr 8;12:RP90795. doi: 10.7554/eLife.90795 (PMC11001300; doi:10.7554/eLife.90795)
Supplement: Figure 6—figure supplement 1—source data 1. [file elife-90795-fig6-figsupp1-data1.xlsx]

## Sheet: Sheet1
Figure 6-figure supplement 1-source data 1
	Sequence name	Species	Zinc finger 1	Zinc finger 2	Zinc finger 3
A	Bm-mamo-S	Bombyx mori	CIHCGAAFPHQSKLTRHILTTH	CEFCGKAFKLRHHMKDHCRVH	CGLCGKTFSRSTILKAHEKTH
	XP_028030952.1	Bombyx mandarina	CIHCGAAFPHQSKLTRHILTTH	CEFCGKAFKLRHHMKDHCRVH	CGLCGKTFSRSTILKAHEKTH
	XP_026737238.1	Trichoplusia ni	CIHCGAAFPHQSKLTRHILTTH	CEFCGKAFKLRHHMKDHCRVH	CGLCGKTFSRSTILKAHEKTH
	XP_030025550.2	Manduca sexta	CMHCGAAFPHQSKLTRHILTTH	CEFCGKAFKLRHHMKDHCRVH	CGLCGKTFSRSTILKAHEKTH
	XP_013138916.1	Papilio polytes	CIHCGAAFPHQNKLARHILTTH	CEFCGKAFKLRHHMKDHCRVH	CVLCGKTFSRSTILKAHEKTH
	XP_013164717.1	Papilio xuthus	CIHCGAAFPHQNKLARHILTTH	CEFCGKAFKLRHHMKDHCRVH	CVLCGKTFSRSTILKAHEKTH
	XP_026755430.1	Galleria mellonella	CIHCGAAFPHQSKLARHILTTH	CEFCGKAFKLRHHMKDHCRVH	CVLCGKTFSRSTILKAHEKTH
	XP_028166361.1	Ostrinia furnacalis	CIHCGAVFPHQSKLARHILTTH	CEFCGKAFKLRHHMKDHCRVH	CVLCGKTFSRSTILKAHEKTH
	XP_026496930.1	Vanessa tameamea	CIHCGAAFPHQSKLTRHILTTH	CEFCGKAFKLRHHMKDHCRVH	CVLCGKTFSRSTILKAHEKTH
	XP_034829915.1	Maniola hyperantus	CIHCGATFPHQSKLTRHILTTH	CEFCGKAFKLRHHMKDHCRVH	CVLCGKTFSRSTILKAHEKTH
	XP_045488275.1	Pieris rapae	CIHCGAAFPHQSKLTRHILTTH	CEFCGKAFKLRHHMKDHCRVH	CVLCGKTFSRSTILKAHEKTH
	XP_032512907.1	Danaus plexippus	CIHCGAAFPHQSKLTRHILTTH	CEFCGKAFKLRHHMKDHCRVH	CVLCGKTFSRSTILKAHEKTH
	KAG7308166.1	Plutella xylostella	CIHCGAAFAHQSKLTRHILTTH	CEFCGKAFKLRHHMKDHCRVH	CVLCGKTFSRSTILKAHEKTH
	XP_031332516.1	Photinus pyralis	CMYCGASFPHQSKLTRHILSH	CEFCGKAFKLRHHMKDHCRVH	CALCGKTFSRSTILKAHEKTH
	KAH1028932.1	Dendroctonus ponderosae	CMYCGISFPHQSKLTRHILSH	CEFCGKAFKLRHHMKDHCRVH	CSLCGKTFSRSTILKAHEKTH
	EEZ97326.1	Tribolium castaneum	CMYCGSSFPHQSKLTRHILSH	CEFCGKAFKLRHHMKDHCRVH	CALCGKTFSRSTILKAHEKTH
	XP_018328010.1	Agrilus planipennis	CMYCGASFPNQTKLTRHILSH	CEFCGKAFKLRHHMKDHCRVH	CTICGKTFSRSTILKAHEKTH
	KAE8748804.1	Frankliniella occidentalis	CSYCGATFPHQSKLTRHILSH	CEYCGKAFKLRHHMKDHCRVH	CTLCGKTFSRSTILKAHEKTH
	XP_031783143.1	Nasonia vitripennis	CMYCGASFLHQSKLTRHILSH	CEFCGKAFKLRHHMKDHCRVH	CSLCGKTFSRSTILKAHEKTH
	XP_014225113.1	Trichogramma pretiosum	CMYCGASFLHQSKLTRHILSH	KCEFCGKAFKLRHHMKDHCRVH	CSLCGKTFSRSTILKAHEKTH
	XP_046595063.1	Neodiprion lecontei	CMYCGASFLHQSKLTRHILSH	CEFCGKAFKLRHHMKDHCRVH	CALCGKTFSRSTILKAHEKTH
	XP_023289904.1	Orussus abietinus	CMYCGASFLHQSKLTRHILSH	CEFCGKAFKLRHHMKDHCRVH	CTLCGKTFSRSTILKAHEKTH
	XP_031848848.1	Nomia melanderi	CMYCGAPFLHQSKLARHILSH	CEFCGKAFKLRHHMKDHCRVH	CTLCGKTFSRSTILKAHEKTH
	XP_026295937.1	Apis mellifera	CMYCGASFLHQSKLARHILSH	CEFCGKAFKLRHHMKDHCRVH	CTLCGKTFSRSTILKAHEKTH
	XP_039312199.1	Solenopsis invicta	CMYCGASFLHQSKLTRHILSH	CEFCGKAFKLRHHMKDHCRVH	CTLCGKTFSRSTILKAHEKTH
	XP_024888493.1	Temnothorax curvispinosus	CMYCGASFLHQSKLTRHILSH	CEFCGKAFKLRHHMKDHCRVH	CTLCGKTFSRSTILKAHEKTH
	XP_029159257.1	Nylanderia fulva	CMYCGASFLHQSKLTRHILSH	CEFCGKAFKLRHHMKDHCRVH	CTLCGKTFSRSTILKAHEKTH
	XP_011351470.1	Ooceraea biroi	CMYCGASFLHQSKLTRHILSH	CEFCGKAFKLRHHMKDHCRVH	CTLCGKTFSRSTILKAHEKTH
	XP_011634406.1	Pogonomyrmex barbatus	CMYCGASFLHQSKLTRHILSH	CEFCGKAFKLRHHMKDHCRVH	CTLCGKTFSRSTILKAHEKTH
	XP_020283602.1	Pseudomyrmex gracilis	CMYCGASFLHQSKLTRHILSH	CEFCGKAFKLRHHMKDHCRVH	CTLCGKTFSRSTILKAHEKTH
	XP_018349524.1	Trachymyrmex septentrionalis	CMYCGASFLHQSKLTRHILSH	CEFCGKAFKLRHHMKDHCRVH	CTLCGKTFSRSTILKAHEKTH
	XP_011875609.1	Vollenhovia emeryi	CMYCGASFLHQSKLTRHILSH	CEFCGKAFKLRHHMKDHCRVH	CTLCGKTFSRSTILKAHEKTH
	XP_011688182.1	Wasmannia auropunctata	CMYCGASFLHQSKLTRHILSH	CEFCGKAFKLRHHMKDHCRVH	CTLCGKTFSRSTILKAHEKTH
	KAI5712856.1	Diaphorina citri	CMYCGLTFPHQSKLTRHILSH	CEFCGKAFKLRHHMKDHCRVH	CSICGKTFSRSTILKAHEKTH
	XP_021695150.1	Aedes aegypti	CMYCGVTFPHQSKLTRHILSH	CEFCGKAFKLRHHMKDHCRVH	CGMCGKTFSRSTILKAHEKTH
	XP_038116712.1	Culex quinquefasciatus	CMYCGATFPHQSKLTRHILSH	CEFCGKAFKLRHHMKDHCRVH	CGMCGKTFSRSTILKAHEKTH
	XP_001688288.2	Anopheles gambiae	CMYCGVTFHNQNKLTRHILSH	CEFCGKAFKLRHHMKDHCRVH	CGMCGKTFSRSTILKAHEKTH
	XP_044573510.1	Drosophila ananassae	CMYCGLGFPNQSKLTRHLLTH	CEFCGKAFKLRHHMKDHCRVH	CNMCGKTFSRSTILKAHEKTH
	DM-PE	Drosophila melanogaster	CIYCRSAFPNQSKLTRHLLTH	CEFCGKAFKLRHHMKDHCRVH	CNMCGKTFSRSTILKAHEKTH
	KAI8121182.1	Lucilia cuprina	CVYCGASFPHQNKLTRHILSH	CEFCGKAFKLRHHMKDHCRVH	CQMCGKTFSRSTILKAHEKTH
	XP_011295303.1	Musca domestica	CVYCAAGFPTQSKLTRHILSH	CEFCGKAFKLRHHMKDHCRVH	CQMCGKTFSRSTILKAHEKTH
	XP_023158604.1	Ceratitis capitata	CMYCGQTFQHQSKLTRHILSH	CEFCGKAFKLRHHMKDHCRVH	CHMCGKTFSRSTILKAHEKTH
	XP_028894016.1	Zeugodacus cucurbitae	CIYCGHTFQHQSKLTRHILSH	CEFCGKAFKLRHHMKDHCRVH	CHMCGKTFSRSTILKAHEKTH
	XP_049310117.1	Bactrocera dorsalis	CIYCGHTFQHQSKLTRHILSH	CEYCGKAFKLRHHMKDHCRVH	CHMCGKTFSRSTILKAHEKTH
	XP_018797450.1	Bactrocera latifrons	CIYCGHTFQHQSKLTRHILSH	CEYCGKAFKLRHHMKDHCRVH	CHMCGKTFSRSTILKAHEKTH
	XP_014258552.1	Cimex lectularius	CMYCAAAFPHQSKLARHILSH	CEFCGKAFKLRHHMKDHCRVH	CSLCGKTFSRSTILKAHEKTH
	XP_002426735.1	Pediculus humanus corporis	CMYCGVRFPHQSKLTRHILSH	CEYCGKAFKLRHHMKDHCRVH	CSICGKTFSRSTILKAHEKTH
	XP_027837536.2	Aphis gossypii	CLYCNLTFPHQSKLTRHILSH	CEFCGKAFKLRHHMKDHCRVH	CALCGKTFSRSTILKAHEKTH
	XP_026807938.1	Rhopalosiphum maidis	CLYCNLTFPHQSKLTRHILSH	CEFCGKAFKLRHHMKDHCRVH	CALCGKTFSRSTILKAHEKTH
	XP_015364809.1	Diuraphis noxia	CLYCNLTFPHQSKLTRHILSH	CEFCGKAFKLRHHMKDHCRVH	CALCGKTFSRSTILKAHEKTH
	XP_008178792.1	Acyrthosiphon pisum	CLYCNLTFPHQSKLTRHILSH	CEFCGKAFKLRHHMKDHCRVH	CALCGKTFSRSTILKAHEKTH
	XP_022183756.1	Myzus persicae	CLYCNLTFPHQSKLTRHILSSHSH	CEFCGKAFKLRHHMKDHCRVH	CALCGKTFSRSTILKAHEKTH
	NP_997827.2 Sp1	Danio rerio	CHIPGCGKVYGKTSHLRAHLRWH	CSWSFCGKRFTRSDELQRHKRTH	CTECPKRFMRSDHLSKHIKTH
	XP_012812108.1 Sp1	Xenopus tropicalis	CHIPGCGKVYGKTSHLRAHLRWH	CTWVFCGKRFTRSDELQRHKRTH	CPECPKRFMRSDHLSKHIKTH
	NP_612482.2 Sp1	Homo sapiens	CHIQGCGKVYGKTSHLRAHLRWH	CTWSYCGKRFTRSDELQRHKRTH	CPECPKRFMRSDHLSKHIKTH
	NP_038700.2 Sp1	Mus musculus	CHIQGCGKVYGKTSHLRAHLRWH	CNWSYCGKRFTRSDELQRHKRTH	CPECPKRFMRSDHLSKHIKTH
	BAA02235.1 Sp1	Rattus norvegicus	CHIQGCGKVYGKTSHLRAHLRWH	CNWSYCGKRFTRSDELQRHKRTH	CPECPKRFMRSDHLSKHIKTH
	Sequence name	Species	Zinc finger 1	Zinc finger 2	Zinc finger 3	Zinc finger 4	Zinc finger 5
B	Bm-L	Bombyx mori	CEQCGQSYRYRSAYVKHREQNH	CDVCGMQFRYLKSFKKHRLNH	CPFCGKCVRSKENLKLHVRKH	CLFCGRAFGGKSDLTRHLRIH	CEACGKCFARADYLSKHLTTH
	XP_028030948.1	Bombyx mandarina	CEQCGQSYRYRSAYVKHREQNH	CDVCGMQFRYLKSFKKHRLNH	CPFCGKCVRSKENLKLHVRKH	CLFCGRAFGGKSDLTRHLRIH	CEACGKCFARADYLSKHLTTH
	XP_030025549.2	Manduca sexta	CEQCGQSYRYRSAYVKHREQNH	CDVCGMQFRYLKSFKKHRLNH	CPFCGKCVRSKENLKLHVRKH	CLFCGRAFGGKSDLTRHLRIH	CEACGKCFARADYLSKHLTTH
	XP_032512905.1	Danaus plexippus	CEQCGQSYRYRSAYVKHREQNH	CDVCGMQFRYLKSFKKHRLNH	CPFCGKCVRSKENLKLHVRKH	CLFCGRAFGGKSDLTRHLRIH	CEACGKCFARADYLSKHLTTH
	EEZ97327.2	Tribolium castaneum	CEQCGQSYRYRSAYVKHREQNH	CDVCGMQFRYLKSFKKHRLNH	CPFCGKCVRSKENLKLHVRKH	CLFCGRAFGGKSDLTRHLRIH	CDMCGKCFARADYLSKHLTTH
	XP_023019928.1	Leptinotarsa decemlineata	CEQCGQSYRYRSAYVKHREQNH	CDVCGMQFRYLKSFKKHRLNH	CPFCGKCVRSKENLKLHVRKH	CLFCGRAFGGKSDLTRHLRIH	CDMCGKCFARADYLSKHLTTH
	XP_048516829.1	Dendroctonus ponderosae	CDQCGQSYRYRSAYVKHREQNH	CDVCGMQFRYLKSFKKHRLNH	CPFCGKCVRSKENLKLHVRKH	CLFCGRAFGGKSDLTRHLRIH	CDMCGKCFARADYLSKHLTTH
	XP_018328007.1	Agrilus planipennis	CEQCGQSYRYRSAYVKHREQNH	CDVCGMQFRYLKSFKKHRLNH	CPFCGKCVRSKENLKLHVRKH	CLFCGRAFGGKSDLTRHLRIH	CDMCGKCFARADYLSKHLTTH
	XP_031332306.1	Photinus pyralis	CDQCGQSYRYRSAYIKHREQNH	CDVCGMQFRYLKSFKKHRLNH	CPFCGKCVRSKENLKLHVRKH	CLFCGRAFGGKSDLTRHLRIH	CDMCGKCFARADYLSKHLTTH
	XP_005191343.1	Musca domestica	CEQCGQSYRYRSAYAKHKETNH	CDVCGMQFRYLKSFKKHRLNH	CPFCGKCVRSKENLKLHVRKH	CLFCGRAFGGKSDLTRHLRIH	CESCGKCFARADYLSKHLTTH
	DM-PI	Drosophila melanogaster	CEQCGQSYRYRSAYAKHKEQNH	CDVCGMQFRYLKSFKKHRLNH	CPFCGKCVRSKENLKLHVRKH	CLFCGRAFGGKSDLTRHLRIH	CESCGKCFARADYLSKHLTTH
	XP_044573509.1	Drosophila ananassae	CEQCGQSYRYRSAYAKHKEQNH	CDVCGMQFRYLKSFKKHRLNH	CPFCGKCVRSKENLKLHVRKH	CLFCGRAFGGKSDLTRHLRIH	CESCGKCFARADYLSKHLTTH
	XP_026280915.1	Frankliniella occidentalis	CEVCGQSYRYRSAYLKHREQNH	CEVCGMQFRYLKSFKKHRLNH	CPFCGKCVRSKENLKLHVRKH	CLFCGRAFGGKSDLTRHLRIH	CEMCGKCFARADYLSKHLTTH
	XP_014258550.1	Cimex lectularius	CDQCGQSYRYRSAYIKHREQNH	CDVCGMQFRYLKSFKKHRLNH	CPFCGKCVRSKENLKLHVRKH	CLFCGRAFGGKSDLTRHLRIH	CEMCGKCFARADYLSKHLTTH
	XP_039298489.1	Nilaparvata lugens	CDQCGQSYRYRSSYLKHREQNH	CDVCGMQFRYLKSFKKHRLNH	CPFCGKVVRSKENLKLHVRKH	CLFCGRAFGGKSDLTRHLRIH	CEMCGKCFARADYLSKHLTTH
	XP_026677926.1	Diaphorina citri	CEQCGQSYRYRSAYLKHREQNH	CDVCGMQFRYLKSFKKHRLNH	CPFCGKCVRSKENLKLHVRKH	CLFCGRAFGGKSDLTRHLRIH	CEMCGKCFARADYLSKHLTTH
	XP_001948243.2	Acyrthosiphon pisum	CDQCGQSYRYRSAYLKHREQNH	CDICGMQFRYLKSFKKHRLNH	CPFCGKCVRSKENLKLHVRKH	CLFCGRAFGGKSDLTRHLRIH	CEMCGKCFARADYLSKHLTTH
	XP_050060583.1	Aphis gossypii	CDQCGQSYRYRSAYLKHREQNH	CDICGMQFRYLKSFKKHRLNH	CPFCGKCVRSKENLKLHVRKH	CLFCGRAFGGKSDLTRHLRIH	CEMCGKCFARADYLSKHLTTH
	XP_025195062.1	Melanaphis sacchari	CDQCGQSYRYRSAYLKHREQNH	CDICGMQFRYLKSFKKHRLNH	CPFCGKCVRSKENLKLHVRKH	CLFCGRAFGGKSDLTRHLRIH	CEMCGKCFARADYLSKHLTTH
	XP_022183752.1	Myzus persicae	CDQCGQSYRYRSAYLKHREQNH	CDICGMQFRYLKSFKKHRLNH	CPFCGKCVRSKENLKLHVRKH	CLFCGRAFGGKSDLTRHLRIH	CEMCGKCFARADYLSKHLTTH
	XP_026807933.1	Rhopalosiphum maidis	CDQCGQSYRYRSAYLKHREQNH	CDICGMQFRYLKSFKKHRLNH	CPFCGKCVRSKENLKLHVRKH	CLFCGRAFGGKSDLTRHLRIH	CEMCGKCFARADYLSKHLTTH
	XP_046595062.1	Neodiprion lecontei	CEQCGQRYRYRSAYVKHREQNH	CDVCGMQFRYLKSFKKHRLNH	CPFCGKCVRSKENLKLHVRKH	CLFCGRAFGGKSDLTRHLRIH	CEMCGKCFARADYLSKHLTTH
	XP_018349523.1	Trachymyrmex septentrionalis	CEQCGQRYRYRSAYVKHREQNH	CDVCGMQFRYLKSFKKHRLNH	CPFCGKCVRSKENLKLHVRKH	CLFCGRAFGGKSDLTRHLRIH	CEMCGKCFARADYLSKHLTTH
	XP_006562717.2	Apis mellifera	CEQCGQRYRYRSAYVKHREQNH	CDVCGMQFRYLKSFKKHRLNH	CPFCGKCVRSKENLKLHVRKH	CLFCGRAFGGKSDLTRHLRIH	CEMCGKCFARADYLSKHLTTH
	XP_012215939.1	Linepithema humile	CEQCGQRYRYRSAYVKHREQNH	CDVCGMQFRYLKSFKKHRLNH	CPFCGKCVRSKENLKLHVRKH	CLFCGRAFGGKSDLTRHLRIH	CEMCGKCFARADYLSKHLTTH
	XP_016839272.1	Nasonia vitripennis	CEQCGQRYRYRSAYVKHREQNH	CDVCGMQFRYLKSFKKHRLNH	CPFCGKCVRSKENLKLHVRKH	CLFCGRAFGGKSDLTRHLRIH	CEMCGKCFARADYLSKHLTTH
	XP_011351469.1	Ooceraea biroi	CEQCGQRYRYRSAYVKHREQNH	CDVCGMQFRYLKSFKKHRLNH	CPFCGKCVRSKENLKLHVRKH	CLFCGRAFGGKSDLTRHLRIH	CEMCGKCFARADYLSKHLTTH
	XP_023289901.1	Orussus abietinus	CEQCGQRYRYRSAYVKHREQNH	CDVCGMQFRYLKSFKKHRLNH	CPFCGKCVRSKENLKLHVRKH	CLFCGRAFGGKSDLTRHLRIH	CEMCGKCFARADYLSKHLTTH
	XP_046463562.1	Daphnia pulex	CEQCGQCYKYLSAFTKHKEQNH	CEICGMQFKYLKSFKKHRLNH	CPFCGKGFRAKENLKLHIRKH	CEFCGRAFGGKSDMNRHLRIH	CDACGKTFARADYLSKHLSTH
	NP_001317554.1	Homo sapiens	CEICGKRFAASGDVQRHIIIH	CDICGRGFSNFSNLKEHKKTH	CDECGKSFNMQRKLVKHRIRH	CSACGKCFGGSGDLRRHVRTH	CEICNKCFTRSAVLRRHKKMH

## Sheet: Sheet2
	XP_026737238.1	Trichoplusia ni
	XP_030025550.2	Manduca sexta
	XP_013138916.1	Papilio polytes
	XP_013164717.1	Papilio xuthus
	XP_026755430.1	Galleria mellonella
	XP_028166361.1	Ostrinia furnacalis
	XP_026496930.1	Vanessa tameamea
	XP_034829915.1	Maniola hyperantus
	XP_045488275.1	Pieris rapae
	XP_032512907.1	Danaus plexippus
	KAG7308166.1	Plutella xylostella
	XP_031332516.1	Photinus pyralis
	KAH1028932.1	Dendroctonus ponderosae
	EEZ97326.1	Tribolium castaneum
	XP_018328010.1	Agrilus planipennis
	KAE8748804.1	Frankliniella occidentalis
	XP_031783143.1	Nasonia vitripennis
	XP_014225113.1	Trichogramma pretiosum
	XP_046595063.1	Neodiprion lecontei
	XP_023289904.1	Orussus abietinus
	XP_031848848.1	Nomia melanderi
	XP_026295937.1	Apis mellifera
	XP_039312199.1	Solenopsis invicta
	XP_024888493.1	Temnothorax curvispinosus
	XP_029159257.1	Nylanderia fulva
	XP_011351470.1	Ooceraea biroi
	XP_011634406.1	Pogonomyrmex barbatus
	XP_020283602.1	Pseudomyrmex gracilis
	XP_018349524.1	Trachymyrmex septentrionalis
	XP_011875609.1	Vollenhovia emeryi
	XP_011688182.1	Wasmannia auropunctata
	KAI5712856.1	Diaphorina citri
	XP_021695150.1	Aedes aegypti
	XP_038116712.1	Culex quinquefasciatus
	XP_001688288.2	Anopheles gambiae
	XP_044573510.1	Drosophila ananassae
	DM-pe
	KAI8121182.1	Lucilia cuprina
	XP_011295303.1	Musca domestica
	XP_023158604.1	Ceratitis capitata
	XP_028894016.1	Zeugodacus cucurbitae
	XP_049310117.1	Bactrocera dorsalis
	XP_018797450.1	Bactrocera latifrons
	XP_014258552.1	Cimex lectularius
	XP_002426735.1	Pediculus humanus corporis
	XP_027837536.2	Aphis gossypii
	XP_026807938.1	Rhopalosiphum maidis
	XP_015364809.1	Diuraphis noxia
	XP_008178792.1	Acyrthosiphon pisum
	Myzus persicae
	NP_997827.2 Sp1	Danio rerio
	XP_012812108.1 Sp1	Xenopus tropicalis
	NP_612482.2 Sp1	Homo sapiens
	NP_038700.2 Sp1	Mus musculus
	BAA02235.1 Sp1	Rattus norvegicus
	BAA02235.1 Sp1 [Rattus norvegicus
