# Supplementary material for: The BTB-ZF gene Bm-mamo regulates pigmentation in silkworm caterpillars
Source: eLife. 2024 Apr 8;12:RP90795. doi: 10.7554/eLife.90795 (PMC11001300; doi:10.7554/eLife.90795)
Supplement: Figure 6—source data 1. [file elife-90795-fig6-data1.xlsx]

## Sheet: Sheet1
Figure 6-source data 1
Name	sequences
>NP_612482.2 Sp1 [Homo sapiens]	MSDQDHSMDEMTAVVKIEKGVGGNNGGNGNGGGAFSQARSSSTGSSSSTGGGGQESQPSPLALLAATCSRIESPNENSNNSQGPSQSGGTGELDLTATQLSQGANGWQIISSSSGATPTSKEQSGSSTNGSNGSESSKNRTVSGGQYVVAAAPNLQNQQVLTGLPGVMPNIQYQVIPQFQTVDGQQLQFAATGAQVQQDGSGQIQIIPGANQQIITNRGSGGNIIAAMPNLLQQAVPLQGLANNVLSGQTQYVTNVPVALNGNITLLPVNSVSAATLTPSSQAVTISSSGSQESGSQPVTSGTTISSASLVSSQASSSSFFTNANSYSTTTTTSNMGIMNFTTSGSSGTNSQGQTPQRVSGLQGSDALNIQQNQTSGGSLQAGQQKEGEQNQQTQQQQI…
>NP_038700.2 Sp1 [Mus musculus]	MSDQDHSMDEVTAVVKIEKDVGGNNGGSGNGGGAAFSQTRSSSTGSSSSSGGGGGQESQPSPLALLAATCSRIESPNENSNNSQGPSQSGGTGELDLTAAQLSQGANGWQIISSSSGATPTSKEQSGNSTNGSESSKNRTVSGGQYVVAATPNLQNQQVLTGLPGVMPNIQYQVIPQFQTVDGQQLQFAATGAQVQQDGSGQIQIIPGANQQIIPNRGSGGNIIAAMPNLLQQAVPLQGLANNVLSGQTQYVTNVPVALNGNITLLPVNSVSAATLTPSSQAGTISSSGSQESSSQPVTSGTAISSASLVSSQASSSSFFTNANSYSTTTTTSNMGIMNFTSSGSSGTSSQGQTPQRVGGLQGSDSLNIQQNQTSGGSLQGSQQKEGEQSQQTQQQQIL…
>XP_008178792.1 [Acyrthosiphon pisum]	MGSEHYCLRWNNHQNNLLGVFSQLLQEESLVDVTLACSEEGRLIRAHKVVLSACSAYFKALFLDHPTRHPIVVLKDVQFSELRDLVEFMYRGEVNVDHRQLTTLLKTAESLKVKGLADMARPSDGDDDTVGDRVELVPADRDDEPMEPEDLRPLSRCRTPVPAESRTPSPPPTESDDNLSMQSEPSDMTTVCRHDDQPSPSGSGLPPVQQVPLFLKKEADCDKTDDRSIQGESSSEFRSIPDPERDSRTTTTTPTTATTTTMTPTTEAVVALSAIPPRFYTCLYCNLTFPHQSKLTRHILSHSLDNQPGGTSFTDPGGGGLSVPPPLSSSAALSLSLLSASSSSTATLQQACGIAGAAAMDDGVGGTLCKFCGKTFPDVATLVGHLPAHTGDRPFKCEF…
>XP_021695150.1 tramtrack [Aedes aegypti]	MGSEHYCLRWHNHQSNLLGVFSQLLQDESLVDVTLACSEGASIRAHKVVLSACSSYFQTLFLDHPTQHPIVILKDVPFAELRTLVDFMYKGEVNVEYCQLPALLQTAESLKVKGLAEMTNQNSALAETKREPERLQRPQSHSSSAAAAAATATATSLTSASSPALSERQQTAASNTSGGTNSATAVSPHNHHHQHHHPALGSPTSNAATAAAVAAAAASLGITDFSTIGKSRGLDPDGRSPSPSRLDRSASPPRTPLALYPPSRKNRDHTHSGSVTSSATTTITMAATERSSEERELSEHQHHQNQKRPRSNSGNAFSSSLNSTSEGLSNNNATSGPNTGSGNDDDEEEDNEENGSMLANESRQTNSEQDHPMLQHCHQRSSVDDDGRRSSSNIHHNNN…
>XP_026295937.1 [Apis mellifera]	MGSEHYCLRWNNHQSNLLGVFSQLLESESLVDVTLACTEGPSIRAHKVVLSACSSYFQALFLDHPNRHPIVILKDVRFAELRTLVDFMYKGEVNVEYCQLSALLKTAESLKVKGLADMTNINAAVASRDEQQQQQQQQQQQQPQQQQQQQQQQQQQQQQQQQHTSTSEGIQRETSREHHRERESIKEASNKERDREGNASSSGGTGLPSGGGVKECEQSQQNVAQLPSSESAEAVDMTDCPPSPTGPGSPCPGPLALDRPRRDSEDAASLEETRGSLSPISVHSGPSDMSLSNNTGSTPGVLPLNLPQSRLPSPHSTEPLAGPSGLPPVQQVPLSLKKEMDWERSTEERSASSEISTDYRLPPDPELMGVDERMFACMYCGASFLHQSKLARHILSHSL…
>XP_014258552.1 [Cimex lectularius]	MRWHDTKAADQEQIEGDISEMGSEHYCLRWNNHQSNLLGVFSQLLEAESLVDVTLASSEGHSLRAHKVVLSACSSYFRALFLDHPARHPIVILKDVCFSELRTLVEFMYRGEVSVETCRLSALLKTAESLKVKGLAEMTALKAGGDDSHGGGEGNDGGGSPQHPAVVAQPIPAPDLPPPPPPPPSMEQQEEVRSPQGTTRDDDDASSVHSAPSDMTPPAPASPHSSEPVPGPSGLPPVQDAPLSLKKEVEWDRTDDKSMGETSSDYKLPHDPENTEVGEGRALYSCMYCAAAFPHQSKLARHILSHSLETLKYREQMFHSQMPHYQPMPLVKSEPISPGALCKFCGKTFPDVGTLIGHLPVHTGDRPFKCEFCGKAFKLRHHMKDHCRVHTGERPFRCS…
>KAE8748804.1 [Frankliniella occidentalis]	MGLGLPHAVARRWAAQSAGNVTGGRTRQCVCCCRGRTTILFHEGRVRRLDMGSGEHYCLRWNNHQSNLLGVFSQLLEDGSLVDVTLACAEEGHSIRAHKVVLSACSSYFQTLFIAHPARHPIVILKDVCFRELRTLVEFMYKGEVNVEYCRLSALLKTAESLKVKGLAEMTNLDKSHEKEAERDRDRDRDRDRDRDKEHDDKDRDQERERERERERDRDRDRERERERERERDRDRERDRERERERERERDRDREDKDRRRDRSDQQDREVNREDDVRQPQPPPPQEHPQSLVQRHRQSPSVSSPSPLPLSAPPRSSANGVSLLEPGELLLGLHGGVHPHPGVHVPLLAHPMPLPLPLTHHHSRLLNSSPDSPPLPAPALPPPPRPPSHSRSLSPSSGM…
>EEZ97326.1 [Tribolium castaneum]	MGSEHYCLRWNNHQSNLLGVFSQLLRDESLVDVTLACSEGHSIRAHKVVLSACSSYFQTLFVDHPSRHPIVILKDVRFAELRTLIEFMYKGEVNVEYCQLSALLKTAESLKVKGLAEMTREYKHTEPEQTEPTELTRRPASRSPSVDENDRLHPSSQSPPVQNLRVCRSPLEHQENDAKRASSPENTRNVSSPVTSDCGPSDMTIHSNSNNMVAACPGMNAPIICTRLPSPITEPLPGPSNMPPVQQVPLSLKKEVDWSGGLEDKNTGESSSDFSRHPHDSELEREGSPRLYPCMYCGSSFPHQSKLTRHILSHSLETLKYREQLQPPPFFGGGVPPPDPTDQPPTMDVDLAEAGGGVVLCKFCGKSFPDVSSLIAHLPVHTGDRPFKCEFCGKAFKLR…
>XP_038116712.1 [Culex quinquefasciatus]	MGSEHYCLRWNNHQSNLLGVFSQLLQDESLVDVTLACSEGASIRAHKVVLSACSSYFQTLFLDHPARHPIVILKDVRFAELRTLVDFMYKGEVNVEYCQLSALLKTAESLKVKGLAEQSTALAEPKRDPDRLRPQSHSSAQHATSLTTSAASPSAVPTSGAGGTTTLGGGSPHQQQQLGSPTSNAAASIVAAAASLGITDLSTTPMGKSRGGLDPDGRSPSPSRLDPPSPTPLALYPPLRKSRDHHPTGSSVSSSATTTITTAAATTAERSSEERDLEHQHHLHLQQQSRPQSNSGNAFSSTLNSLSSTVERLNNSNNNAGMSSSSSALNDSGNLRLRQRRNDDDDDDDDDDDEDMEENGERTGISLNSKQDALLQHCHRGDDDGRRSSTNNNNNNSDD…
>XP_032512907.1 [Danaus plexippus ]	MGSEHYCLRWNNHQSNLLGVFSQLLHDESLVDVTLACSEGASIRAHKVVLSACSSYFRSLFVDHPSRHPIVILKDVGLEELRTLVDFMYKGEVNVQYCQLPALLKTAESLQVKGLAEMTTLSAAGIDTRNVPEPMDECQQRDTRECAESHETLDDQEERREAKEFRELRERESKDNRESHREIRDSRELREHRERERDRESRELIREIRDPRDPCRDHRELREVKDSRDPRDLRDTRDPRELRDSLDPREATEASPPRISPLLSVRRFRPDISIDTPTLTHPPIPKDEPPDEPIRPTSPEDDTISIRSNGASENMGINMTINSHGMGPRYSPVEQRLSVLNTLPHPGLTHPSHSSLSSPRNEPIAGPSGLPPVQQVPLSLKKEADWDRGNDEKVGETDY…
>XP_044573510.1 [Drosophila ananassae]	MGSEHYCLRWNNYQSNLLGVFSQLLQDGSLVDVTLVCSEGTSIRAHKVVLSACSSYFQSLFLEHPERHPIVILKDVRFAELQTLVEFMYKGEVNVQYCQLSALLKTAESLKVKGLAEMTNQNTTLREPEREPDRLRPQGGGGGSGGGVASAHKAADSPATALDATAATQAAAATSAATATATATAAAATSTSATSAAGAGTGTGTGTGTAAGSSSSTTSTTTSSSTTTSCATAATSTAGAAAPSAAAAATSAEEATSSSSSSTQPGQKREASDQSSPTPAKRSSRHQDASEDALDTHSGKEHVQPADELLQEELLAGGRNEEDEDAVEEVDELDENEDFEDALREQERDPEHEDDEDEEDTPMPLDLYHRPAVEAKVAGKRVGSGLGSRLGHTFYKYPF…
>KAI8121182.1 [Lucilia cuprina]	MLDFCLVLLQETSDSPHGLGGIANTGGGSGSGGGGGGSLAGSSSATTSNTASSYVHEQPQTPPPFTCVYCGASFPHQNKLTRHILSHSLKTLEYRETATHALLHPHLLGHDLNMSPLAYQMNAAMASASGDAQDQAAAVAAAVAMDMDFAAALAAAGGCPFPSLASCTARGLDLDGSGGLGGSGGGGVGGGSSSSSRTGRDGVGGGNSSASGNGGCPSSSLSLLSGAGSSTSAAAAAVAAAAAASSSASSNDPNSVVLCKFCGKSFPDVTSLITHLPIHTGDRPFKCEFCGKAFKLRHHMKDHCRVHTGERPFRCQMCGKTFSRSTILKAHEKTHFPKYARKFLSPSPVDTKDELPQ
>XP_011295303.1 [Musca domestica]	MGSGGMGGGAGSSSLCPSASSSINTASSSSYMHDHPRTPPPYSCVYCAAGFPTQSKLTRHILSHSLKTLEFRETAATHALLHPHLLGHDLNMSPLAYQINAAMAATAAGGDPQEQAAAVALAMDIDFNAAALAAAGGCVFPSLTSCTGRGLDLDGSGGGGGGSSSSGRGGRDSRGGGGGGGGGMGGGRGSGLDDDSRTSSGNGGCPSSSLSLLSGAGSSTSAAAAAAAAAAAASSSGSSLLASSNDPNSVVLCKFCGKSFPDVTSLIQHLPVHTGDRPFKCEFCGKAFKLRHHMKDHCRVHTGERPFRCQMCGKTFSRSTILKAHEKTHFPKYARKYLTPSPVDTKDELPQ
>XP_031783143.1 [Nasonia vitripennis]	MGSEHYCLRWNNHQSNLLGVFSQLLESESLVDVTLACTEGPSIRAHKVVLSACSSYFQALFLDHPNRHPIVILKDVRFAELRTLVDFMYKGEVNVEYCQLSALLKTAESLKVKGLADMTNINAAAVQSSKEEEQQSPPQAQLPAQQQQQPQQQQQSTTGTSSSSTTTTTTTTTATATALTTPAANEPMLQDAQDERLHQHHHQHHQHSGTGRSSDSKDSRERNNDRDRDCRDRDRDRERDREKERDKRDTSSRERELQQQQQQALAQQQRDREQRERDREHNLSVNECSTDDVEISECPASPPTSATTRTSRGAASSPCPGPLALDRPRSRRDSDSAASLEETRGSLSPLSVHSGPSDMSLSNNNSSAGAGGIGGGVTPVTIPISSLPQSRLPSPHSTE…
>XP_002426735.1 [Pediculus humanus corporis]	MSQDFDQEDMSGRIRNFPCMYCGVRFPHQSKLTRHILSHSLETLKFREQSHPQMVHPVLGLESMNFMDNHYSTFPQKFEAFEQPSDGSSDVDFTASFQIGGDGCQTNSVLCKFCGKSFPEVGSLIAHLPVHTGDRPFKCEYCGKAFKLRHHMKDHCRVHTGERPFRCSICGKTFSRSTILKAHEKTHYPKFVPKFVASTSIDHIDDTGTAPAIIRKFSPSAIDPYPEAGSSHSQ
>XP_027837536.2 [Aphis gossypii]	MGSEHYCLRWKNHQNNLLGVFSQLLQEESLVDVTLACSEEGRLIRAHKVVLSACSAYFKALFLDHPTRHPIVVLKDVQFSELRDLVEFMYRGEVNVDHRQLTTLLKTAESLKVKGLADMARPSDGDDDTVGDRVELVPADRDDEPMEPEDLRPLSRCRTPVPAESRTPSPPPTESDDNLSMQSEPSDMTTVCRHDDQPSPSGSGLPPVQQVPLFLKKEADCDKTDDRSIQGESSSEYRSIPDPERDSRTTTTTPTPTPTTPTPATTTTTTTAADAVVALATTIPPRFYTCLYCNLTFPHQSKLTRHILSHSLDNNQPGGTSFTDPGGGGGGMTVPPPLSSSAAALSLSLLSASSSSTAASLQQACGITGAMDDGVGGTLCKFCGKTFPDVATLVGHLPA…
>KAI5712856.1 [Diaphorina citri]	MTQDLSTRSRTAPPSQENESSSAEPPAHSTALQQRLEASPPVIELTTIKRRLSSEDERNTPSPRPQTPSPPPDCPEPSNLSLKEDRSPSPPDVDDVSSMQSGPSDMTLNSRIPSPLSGEPVPGPSGLPPVQQVPLSLKKEVDWDSRGDDKSTTGESSSDYRHVHDPDNSAGEMSDSRALFPCMYCGLTFPHQSKLTRHILSHSLESLKFREHQLQHSSLISMVGLVEPLMEGGHYISQHPQVSLEPPILPEVTNMEVTGDSPQNALCKFCGKSFPDVSALITHLPVHTGDRPFKCEFCGKAFKLRHHMKDHCRVHTGERPFKCSICGKTFSRSTILKAHEKTHYPKYTRKFLSSPNSPDDDRERRPPDLSSFTLPCDLSSTPSEPPQMYLPRSPTTP
>XP_015364809.1 [Diuraphis noxia]	MGSEHYCLRWNNHQNNLLGVFSQLLQEESLVDVTLACSEEGRLIRAHKVVLSACSAYFKALFLDHPTRHPIVVLKDVQFSELRDLVEFMYRGEVNVDHRQLTTLLKTAESLKVKGLADMARPSDGDDDTVGDRVELVPADRDDEPMEPEDLRPLSRCRTPVPAESRTPSPPPTESDDNLSMQSEPSDMTTVCRHDDQPSPSGSGLPPVQQVPLFLKKEADCDKTDDRSIQGESSSEYRSIPDPERDSRTTTTTPTTTTTTMMMPTTDKAAIPPRFYTCLYCNLTFPHQSKLTRHILSHSLDNQHSGTSFTDPGGGGGLTVPPPLSSSAALSLLSASSSSTASLQQACGIAGAAAMDDGVGGTLCKFCGKTFPDVATLVGHLPAHTGDRPFKCEFCGKAF…
>XP_022183756.1 [Myzus persicae]	MGSEHYCLRWNNHQNNLLGVFSQLLQEESLVDVTLACSEEGRLIRAHKVVLSACSAYFKALFLDHPTRHPIVVLKDVQFSELRDLVEFMYRGEVNVDHRQLTTLLKTAESLKVKGLADMARPSDGDDDTVGDRVELVPADRDDEPMEPEDLRPLSRCRTPVPAESRTPSPPPTESDDNLSMQSEPSDMTTVCRHDDQPSPSGSGLPPVQQVPLFLKKEADCDKTDDRSIQGESSSEYRSIPDPERDSRTTTTTPTTTTTTMMTPTTDAVVALTATPPRFYTCLYCNLTFPHQSKLTRHILSHSLDNQPGGTSFTDPGGGGGLAAPPPLSSSAALSLSLLSASSSSTASLQQACGIAGTAAMDDGVGGTLCKFCGKTFPDVATLVGHLPAHTGDRPFKCE…
>XP_026807938.1 [Rhopalosiphum maidis]	MGSEHYCLRWNNHQNNLLGVFSQLLQEESLVDVTLACSEEGRLIRAHKVVLSACSAYFKALFLDHPTRHPIVVLKDVQFSELRDLVEFMYRGEVNVDHRQLTTLLKTAESLKVKGLADMARPSDGDDDTVGDRVELVPADRDDEPMEPEDLRPLSRCRTPVPAESRTPSPPPTESDDNLSMQSEPSDMTTVCRHDDQPSPSGSGLPPVQQVPLFLKKEADCDKTDDRSIQGESSSEYRSIPDPERDGRTTTTTPTPTPTTPTPATMTTTTAAADAIVALTTTPTRSYTCLYCNLTFPHQSKLTRHILSHSLDNNQPGGTSFTDPGGGGGGTTVPPPLSSSAALSLSLLSASSSAAAAASLQQACGIAGAMDDGVGGTLCKFCGKTFPDVATLVGHLPAH…
>XP_018328010.1 [Agrilus planipennis]	MGSEHYCLRWNNHQSNLLGVFSQLLRDESLVDVTLACSEGHSIRAHKVVLSACSSYFQTLFLDHPSRHPIVILKDVHFSELRTLIEFMYKGEVNVEYCQLSALLKTAESLKIKGLAEMTQLGSSRDFKPNDIEAEQKEPKELVLKRPLEDQDQSHSQTPPRICRTPDRPPSVENIRTTSTPREECGPSDMSLHSNNNPITNCPALGAGPPSSRLPSPSINDEPLPGPSGLPPVQVAPLSLKKEADWGGGGGGGGGGGGGQTNDSTAGEGSSEFNRPPHDSDLDHGDGGSPRLFPCMYCGASFPNQTKLTRHILSHSLETLKYREQMQHPAGPLGFHEPLHLMEPTFHVRGASAPPEPPDPTDQPPTPMDLDPASGEGGGVVLCKFCGKSFPDVGSLITH…
>XP_046595063.1 [Neodiprion lecontei]	MAVFLWESHLHRDRVAGSSDMGSEHYCLRWNNHQSNLLGVFSQLLESESLVDVTLACTEGPSIRAHKVVLSACSSYFQALFLDHPNRHPIVILKDVRFSELRTLVDFMYKGEVNVEYCQLSALLKTAESLKVKGLADMTNINAAASSRDELDQQQQQQQQQQHHQQQQQQQQQQQQQQQQQQQQQQHLANENQRDREHRERDRDKERERERDRDRERERERERERERERERERERDRETEVECEQSQPQQLSDVMEAVHMTECPPSPTGPGSPCPGPLALHRTRRNSDDAASLEETRGSLSPISVHSGPSDMSLSNNTAGATAGGIIPLQLPQSRLPSPHSTEPLAGPSGLPPVQQVPLSLKKEVDWERSTDDRVSNIEATTDYRLPPDPELMGLDERV…
>XP_031848848.1 [Nomia melanderi]	MFLFVWLQELMGVDERVFACMYCGAPFLHQSKLARHILSHSLESLKYREQAAHLQLQAQLGLEPGMHLPPEAHYPASGTIEPVDLELAAHSDPTSGVVLCKFCGKSFPDVGSLIAHLPAHTGDRPFKCEFCGKAFKLRHHMKDHCRVHTGERPFRCTLCGKTFSRSTILKAHEKTHYPKYVRKFLSPSPVDPSEEEAPPPPPPHH
>XP_029159257.1 [Nylanderia fulva]	MFLFVWLQELMGVDERVFACMYCGASFLHQSKLTRHILSHSLESLKYREQAAHLQLQAQLGLEPGMHLPPEAHYPAAGTIEPMDFELAAHSDPTSGVVLCKFCGKSFPDVGSLIAHLPAHTGDRPFKCEFCGKAFKLRHHMKDHCRVHTGERPFRCTLCGKTFSRSTILKAHEKTHYPKYVRKFLSPSPVDPSEEEAPPPPPPHH
>XP_011351470.1 [Ooceraea biroi]	MGSEHYCLRWNNHQSNLLGVFSQLLESESLVDVTLACTEGPSIRAHKVVLSACSSYFQALFLDHPNRHPIVILKDVRFAELRTLVDFMYKGEVNVEYCQLSALLKTAESLKVKGLADMTNINAAVASRDEQQQQQQQQQQQQQQQQQQQHTSSSDTSREHHRERERERERDRDRDRDRDRDRDRDSIKETSGKDRERETNVAGGLSVKECEQQQQQQQQSQQQQQQQQPSITQNTPSEPTEAVDMTDCPPSPAGPGGSPCPGPLALDRPRRDSEDAASLEETRAGSLSPISVHSGPSDMSLSNNTGGGAPGGVLPLNLPQSRLPSPHSTEPLAGPSGLPPVQQVPLSLKKEMDWERSTEERSVSSEISADYRLPPDPELMGVDERVFACMYCGASFLHQ…
>XP_023289904.1 [Orussus abietinus]	MFLFVWLQELMGVDERVFACMYCGASFLHQSKLTRHILSHSLESLKYREQAHLQLQAQLGLEAGAGGMHLAGEVHYPGPGPVEPVDLELAAVHSDPASGVVLCKFCGKSFPDVGSLIAHLPAHTGDRPFKCEFCGKAFKLRHHMKDHCRVHTGERPFRCTLCGKTFSRSTILKAHEKTHYPKYVRKFLSPSPVDPTEEEAPPPPPPHH
>XP_011634406.1 [Pogonomyrmex barbatus]	MGSEHYCLRWNNHQSNLLGVFSQLLESESLVDVTLACTEGPSIRAHKVVLSACSSYFQALFLDHPNRHPIVILKDVRFAELRTLVDFMYKGEVNVEYCQLSALLKTAESLKVKGLADMTNINAAVASREEQQQQQQQQQQQQQQQQQQHTSTSDTSREHHRERERDRERDRESIKETSGKERERESNVTTGASVGAKECEQQQQQQQQQQQQQQQQQQQQQQQQSGSIAQNTPSETAEAVDMTDCPPSPTGPGSPCPGPLALDRPRRDSEDAASLEETRAGSLSPISVHSGPSDMSLSNNTGAPGGVLPLNLPQSRLPSPHSTEPLAGPSGLPPVQQVPLKERESEMSLSRGGTERRREDKKLMFLFVWLQELMGVDERVFACMYCGASFLHQSKLTRH…
>XP_020283602.1 [Pseudomyrmex gracilis]	MGSEHYCLRWNNHQSNLLGVFSQLLESESLVDVTLACTEGPSIRAHKVVLSACSSYFQALFLDHPNRHPIVILKDVRFAELRTLVDFMYKGEVNVEYCQLSALLKTAESLKVKGLADMTNINAAVASREEQQQQQQQQQQQQQQQQQQQQQQQHTSGSDTSREHHRERDRERERERDRDCIKEASSKDRERESNVVPGMSSGAKECEQQQQQQQQQQQQQQQQQQQQQQQQQQQSSSVAQNTPSESAEAVDMTECPPSPAGPGSPCLGPLALDRPRRDSEDAASIEETRAGSLSPISVHSGPSDMSLSNNTGGGAPGGGGGGGGSGVLPLNLPQSRLPSPHSTEPLAGPSGLPPVQQVPLSLKKEMDWERSTEERSASSEISTDYRLPPDPELMGVDER…
>XP_039312199.1 [Solenopsis invicta]	MSLSRGGRERQREDKKLMFLFVWLQELMGVDERVFACMYCGASFLHQSKLTRHILSHSLESLKYREQAAHLQLQAQLGLEPGMHLPPEAHYPTAGTIEPMDFELAAHSDPTSGVVLCKFCGKSFPDVGSLIAHLPAHTGDRPFKCEFCGKAFKLRHHMKDHCRVHTGERPFRCTLCGKTFSRSTILKAHEKTHYPKYVRKFLSPSPVDPSEEEAPPPPPPHH
>XP_024888493.1 [Temnothorax curvispinosus]	MFLFVWLQELMGVDERVFACMYCGASFLHQSKLTRHILSHSLESLKYREQAAHLQLQAQLGLEPGMHLPPEAHYPTAGTIEPMDFELAAHSDPTSGVVLCKFCGKSFPDVGSLIAHLPAHTGDRPFKCEFCGKAFKLRHHMKDHCRVHTGERPFRCTLCGKTFSRSTILKAHEKTHYPKYVRKFLSPSPVDPSEEEAPPPPPPHH
>XP_018349524.1 [Trachymyrmex septentrionalis]	MGSEHYCLRWNNHQSNLLGVFSQLLESESLVDVTLACTEGPSIRAHKVVLSACSSYFQALFLDHPNRHPIVILKDVRFAELRTLVDFMYKGEVNVEYCQLSALLKTAESLKVKGLADMTNINAAVASREEQQQQQQQQQQQQQQQQQQQQQHTSTSDTSREHHRERERERERERESIKETSGKERERESNVTTGVSAGAKECEQQQQQQQQQQQQQQQQSSSIVQSTPSETTEAVDMTDCPPSPAGPGSPCPGPLALDRPRRDSEDAGSLEETRAGSLSPISVHSGPSDMSLSNNTGGAPGGGVLPLNLPQSRLPSPHSTEPLAGPSGLPPVQQVPLSLKKEMDWERSTEERSASSEISADYRLPPDPELMGVDERVFACMYCGASFLHQSKLTRHILS…
>XP_014225113.1 [Trichogramma pretiosum]	MGSEHYCLRWNNHQSNLLGVFSQLLESESLVDVTLACTEGPSIRAHKVVLSACSSYFQTLFLDHPNRHPIVILKDVRFAELRTLVDFMYKGEVNVEYCQLSALLKTAESLKVKGLADMTNINAASSTGNPIKQESVTASLNPSSRPAVDSPPLAVLRPLPTSASTPASTPPVTTSSAINTASTTTTASSSTTSTKTTSAQNNANSSTTSNSQQQQQQPQQIQSENMAQNNDSTSREHERQRRSRSRDRERDRERDRERDRERDRTRDREPIRDETSRERDAPLAAHHRHNSGHTTTLSPSRDDSDNQDAPGYSPPRRTRSQSPCPGPLALDRPRSRRDSDSPVSQGDTKGSISPISLHSGPSDMSLSNNTSSAQATLPSVIAAAAAAGLSAPHSRLSSP…
>XP_011875609.1 [Vollenhovia emeryi]	MGSEHYCLRWNNHQSNLLGVFSQLLESESLVDVTLACTEGPSIRAHKVVLSACSSYFQALFLDHPNRHPIVILKDVRFAELRTLVDFMYKGEVNVEYCQLSALLKTAESLKVKGLADMTNINAAVASREEQQQQQQQQQQQQQQQQQQQHTSTSDTSREHHRERERDRDRERERERERERERDRERERDRDRDSIKETSGKERERESNVTTGVSVGAKECEQQQQQQQQQQQSSSIVQNTPSESADAVDMTDCPPSPAGPGSPCPGPLALDRPRRDSEDAASLEETRAGSLSPISVHSGPSDMSLSNNTGGGAPGVLSLNLPQSRLPSPHSTEPLAGPSGLPPVQQVPLSLKKEMDWERSTEERSASSEISADYRLPPDPELMGVDERVFACMYCGASF…
>XP_011688182.1 [Wasmannia auropunctata]	MGSEHYCLRWNNHQSNLLGVFSQLLESESLVDVTLACTEGPSIRAHKVVLSACSSYFQALFLDHPNRHPIVILKDVRFAELRTLVDFMYKGEVNVEYCQLSALLKTAESLKVKGLADMTNINAAVASREEQQQQQQQQQQQQQQQQQQQQQQQQHTSTSDTSREHHRERESIKETSGKERERESNITTGVSVGAKECEQQQQQQQQQQQSSSIVQSTPSESAEAVDMTDCPPSPAGPGSPCPGPLALDRPRRDSEDAASLEETRAGSLSPISVHSGPSDMSLSNNTGGGTPGGVLPLNLPQSRLPSPHSTEPLAGPSGLPPVQQVPLSLKKEMDWERSTEERSASSEISADYRLPPDPELMGVDERVFACMYCGASFLHQSKLTRHILSHSLESLKYRE…
>XP_001688288.2 [Anopheles gambiae]	MGSDHYCLRWNNHQSNLLGVFSQLLQDESLVDVTLACSEGASIRAHKVVLSACSSYFQTLFLDHPARHPIVILKDVRFAELRTLIEFMYKGEVNVEYCQLSALLKTAKSLKVKGLTEMTNQSSPLTEPKLEPERLRPHSSHGAGGGVGATGGSNSGSGSGGTTLAASEAILPTNLSTTLPTATLAGGGGGPYLTSTTTTATPGAASTTVSTTATTATTTGSRSSTTTTTTTTSEPDGADRPAAAEQQQQHHQQHSQQHHYTTQQQRLSSSGIGSASVTSASSLSSSSSSSSSTATAGNVTDLSTTHGKDAAMVCEADASTAAAPSATTTTTPLSLLTRKHRDAPIDIATATTALSSASAAAVTSSARTAARWWRWCLAAAAAPPPPTVIQRPASGDGIL…
>XP_049310117.1 [Bactrocera dorsalis]	MLDFCLVLFQETSDSPHVVSVSAGGGGGGGGNVACSTSAAAAAAAIAASAASTSHSLDQSQTPPPLYQCIYCGHTFQHQSKLTRHILSHSLKTLEYRETAQHPLLHSQLLSHDLNLAQLPHFTTYQMNAAALAASGADAQEQQAAAAVMAAAMELAATCGSVGARGALDLDGSGGRLGHGGGVGGGGSATDNCGIGGTSAGSGGMVLSGAGSSSSSTSAAAAAAAAAALAATSSSSGSLLGASSSGADPNGVVLCKFCGKSFPDVHVLIGHLPVHTGERPFKCEYCGKAFKLRHHMKDHCRVHTGERPFRCHMCGKTFSRSTILKAHEKTHFPKYVRKFLSPSPVDTKDELPQ
>XP_018797450.1 [Bactrocera latifrons]	MGSEHYCLRWNNHQSNLLGVFSQLLQDESLVDVTLACSEGALIKAHKVVLSACSSYFQSLFLDHPEKHPIVILKDVRLAELKTLVEFMYKGEVNVQYCQLSALLKTAESLKVKGLAEMTNQNTTLREPEREPDRLRPHSQPIKSTCDSPVDTALSSGSNTSLAATSAANLATSAASSPTAATGTASTNVTANATTAPATTTPVSTTAAAVVAAAAAAVVAVTQQQQQQQAATASASTSTTSTSSTSAGSSAGSATTASTAQKRDASGERGGGGGSPSSSAPPTKRQQMSPERDSSPLPLDLYQGRSAAEAATLGQDGGGGVRATSEECDATTHAISKNNNNSSSNKNTTSSGGGGGIASGMNTQTAHHNNGNADNKPSRRRDDSDDEDDDDEPHHGITA…
>XP_023158604.1 [Ceratitis capitata]	MLDFCLVLFQETSDSPHATTASDGGRCGGGGGIGSTSAGGGGGGGSTISCSTSAAAAAAAAAIAASAASSAHHHLDQSQTPPTLYPCMYCGQTFQHQSKLTRHILSHSLKTLEYRETAQHPLLHSHLLSHDLNLAQLPQFTTYQMSALAASGADTQEQQQVTAAVVAAAMELDFAAALAATCGGVGTRGTLDLDGSGCGGGGGGGSGGAGGVRSGHGGIGGSASGNGGIGGSPAGSGGGLILSGGPSSSSSSTSAAAAAAAAAAALAATSSSSSSLLGATSGCADPNSVVLCKFCGKSFPDVTSLITHLPVHTGERPFKCEFCGKAFKLRHHMKDHCRVHTGERPFRCHMCGKTFSRSTILKAHEKTHFPKYVRKFLSPSPVDTKDELPQ
>XP_028894016.1 [Zeugodacus cucurbitae]	MLDFCLVLFQETSDSPHVAVAGGLSVSAGGGGGNVACSTSAAAAAAAIAASAASTSHNLDQSQTPPPLYTCIYCGHTFQHQSKLTRHILSHSLKTLEYREPAQHPLLHPHLLSHDLNLTQLPQFTTYQMNALAASGADTQEQHAAAAVMAAAMELAASCGGVGARGALDLDGGGGGGGGGGRLGHGGSASGNSGIGGSSAGSGGMVLSGAGSSSSSSTSAAAAVAAAAALAASSSTSGSLMGASSSGADPNGVVLCKFCGKSFPDVHVLIGHLPVHTGERPFKCEFCGKAFKLRHHMKDHCRVHTGERPFRCHMCGKTFSRSTILKAHEKTHFPKYVRKFLSPSPVDTKDELPQ
>XP_034829915.1 [Maniola hyperantus]	MGSEHYCLRWNNHQSNLLGVFSQLLHDESLVDVTLACSEGASIRAHKVVLSACSSYFRSLFVDHPSRHPIVILKDVGLEELRTLVDFMYKGEVNVQYCQLPALLKTAESLQVKGLAEMTTLSAAGIDARNVPEPMDECQQQDARECTEMHERLDERDIREKEERREVKDSREIRERECKDPRDSHREARETRDLREHREWDREREREARDLIRETRDSRDSRDHRESRDHRDSREVKDREPRDLREIRDPRDHRESRDPRDAPEASPPRISPLLTVRRFRPETSIETPTLTHPPIPKDEPPDEPMRPSSPEDDSVSIRSNGASESMGINMTINSHGVLGPRYSPVEQRLSVLNTLPHPGLPHPSHSSLSSPRNEPIAGPSGLPPVQQVPLSLKKEADWD…
>XP_026755430.1 [Galleria mellonella]	MAIACHFCRAAGASSDMGSEHYCLRWNNHQSNLLGVFSQLLHDESLVDVTLACSEGASIRAHKVVLSACSSYFRSLFVDHPSRHPIVILKDVGLEELRTLVDFMYKGEVNVQYCQLPALLKTAESLQVKGLAEMTTLSAAGIEARNVSEPMEECQSQDTKECLEPHERVDSRDSREKEERRERESRESRERESKDNREARDGHHRDVRESRDSREHRDRESRDLREIRETREPRDLRESRDHRELRDTRDVREPRDFREVPRDLRDNRDARDLREAPEASPPRISPLLSVRRFRSEVSGETPTLTHPPIPKDEPPDDPMRSSSPEDDAVSLRSNGAQNDNIGLNMTINSHSGAVLGSSYSPVEQRLSVLNAIPHPGLPHPSHPSLPSPRSEPIAGPSGL…
>XP_030025550.2 [Manduca sexta]	MGSEHYCLRWNNHQSNLLGVFSQLLHDESLVDVTLACSEGASIRAHKVVLSACSSYFRSLFVDHPSRHPIVILKDVGLEELRTLVDFMYKGEVNVQYCQLPALLKTAESLQVKGLAEMTTLSAAGIDTRSVPEPMDECQGQDTKECPELHDRLDGRENREKDERRDIKDSRDRESKESRDSRESHTREPRESREHREQRESREMREPRDLREIREPRDARDLRESRELREHRDLREAREIREPRDLREVRDPRDPRDIRDQRETTETSPSRISPLLSVRRFRTETSTENPTPTHPPLPKDEPPDEPMRSSSPEDDSVSIRSNGAQNENVGINMTINSHSSVLGARYSPVERLSVLNTIPHPGLPHPSHPSLPSPRSEPIPGPSGLPPVQQAPLPFLPLF…
>XP_028166361.1 [Ostrinia furnacalis]	MGSEHYCLRWNNHQSNLLGVFSQLLHDESLVDVTLACSEGASIRAHKVVLSACSSYFRSLFVDHPSRHPIVILKDVGLEELRTLVDFMYKGEVNVQYCQLPALLKTAESLQVKGLAEMTTLSAAGIDARNVPEPMEECQSQDTRECQEPHERLENREPREIKEERREVKEPRETRDRESKDVREARESHTRESRETRDSREPRDRSSLDLRESTLRDIREARESRDIRDHRESREPRDLREPRDLRDARDLRDTRESRDPREVPEASPPRISPLLSVRRFRTETSNETPTTTHPPLPKDEPPDEPMRSSSPEEDAVSIRSNGAQSDTIGINMTINSHSSGILGPRYSPVEQRLSVLNAMPHPGLPHPHPALSSPRSEPIAGPSGLPPVQQVPLSLKKEI…
>XP_013138916.1 [Papilio polytes]	MGSEHYCLRWNNHQSNLLGVFSQLLHDESLVDVTLACSEGASIRAHKVVLSACSSYFRSLFVDHPSRHPIVILKDVGLEELRTLVDFMYKGEVNVQYCQLPALLKTAESLQVKGLAEMTTLSAAGIDTRNVQEPMEDSQPQDMRECTEPHERLEEREIREREERREAKELRERECKESRDVRETHSRESREGRDLHREREQRERERELREPRDLRDLRDSRESRDLREPRDHRELRDSRENRDPRDLRDIRDLRDLRDTRDLREGPDASPPRISPLLSVRRFRSETSIEAPTPIHPSIPKDEPPDEPLRPPSTEDDTISIRSNGDNIGINMTINSHSSGSALGPRYSPVEQRLSVLNALPHPGLPHPSHASLPSPRNEPIAGPSGLPPVQQVPLSLKKE…
>XP_013164717.1 [Papilio xuthus]	MGSEHYCLRWNNHQSNLLGVFSQLLHDESLVDVTLACSEGASIRAHKVVLSACSSYFRSLFVDHPSRHPIVILKDVGLEELRTLVDFMYKGEVNVQYCQLPALLKTAESLQVKGLAEMTTLSAAGIDTRNVQEPMEESQPQDMRECTEPHERLEDREIREKEERREAKELRERECKESRDGREIHTRDSREGLGRDLQRDREQRERERELREPRDLRDLRDSRECRDLRESREIRDSRENREPRDLRDIRDPRDLREGRDPREGPDTSPPRISPLLSVRRFRSETSIEAPTAIHPSIPKDEPPDEPIRPPSTEDDTISIRSNGDNIVGAAIIRKLWRGFSSTYQGINMTINSHSSGSVLGPRYSPVEQRLSVLNALPHPGLPHPSHASLPSPRNEPIAG…
>XP_031332516.1 [Photinus pyralis]	MAVVTYTLEYADDILILITDKFEATLCRLMMHQLTLRITEEWCSYCEASEAKYVTKRYNKNQLVRKNDNKRGLQMHQSLKKEVDWGGGCADDKNTRESPSDYARHPHDPSLKKEVDWGGGATEDKKSSIENYSEYSRHPHDSDLDRGDDDSPRLYPCMYCGASFPHQSKLTRHILSHSLETLKYREQLQHPTSLNLPEPLHLMESHFSGRVPISHLEAAEATDHPSTPMDLELSGDGAGVVLCKFCGKSFPDVSSLIAHLPVHTGDRPFKCEFCGKAFKLRHHMKDHCRVHTGERPFRCALCGKTFSRSTILKAHEKTHFPKYVRNFLSPSPLDAKEESPH
>XP_045488275.1 [Pieris rapae]	MGSEHYCLRWNNHQSNLLGVFSQLLQDESLVDVTLACSEGASIRAHKVVLSACSSYFRSLFVDHPSRHPIVILKDVGLEELRTLVDFMYKGEVNVQYCQLPALLKTAESLQVKGLAEMTTLSAAGVDARNVSEPMEETTAQNTSECTESQDRLHERESRDKDERHDIKEPREREKDIRESRDIREPRDLRESRGEKERESRELMRDREPRESRETRDHRDIRDGRESRELRELRDAREGPETSPPRISPLLSVRRFRTESSVETLTPTHPPILKDEPPDEPMRSLSPEDDSVSIRSNGASESIGINMTINSHSSLASRYSPVEQRLSVLNTLPHPGLPLHSHTSLPSPRNEPIAGPSGLPPVQQVPLSLKKEIDWDRSNEDKGGGEPSASDYRLQHESE…
>CAG9133140.1 [Plutella xylostella]	MADGPEAGGRCGAARRVQLHAAARAPCVLPKLFGAAPSIFPARCGKLAGGGAAPPRASAGAARGAGPVHRAVQRSDSRTTTRPRDATGAAGSWHVARDCLAGAPPAPPSDRPVRRARQLVGWNPECAHSHQAAGASSDMGSEHYCLRWNNHQSNLLGVFSQLLHDESLVDVTLACSEGASIRAHKVVLSACSSYFRSLFVDHPSRHPIVILKDVGLEELRTLVDFMYKGEVNVQYCQLPALLKTAESLQVKGLAEMTTLSAAGLDTRHVPEPMEECQSQDIRECPETQERVAIRDIREKDNREERHETQDVRETREKETKEISETRESRPLRETRDLRETREHRNREQREPRDLRENRDTHDIREPRDFRESRELRDHRELRETREPRDLREPRDMREM…
>XP_026737238.1 [Trichoplusia ni]	MGSEHYCLRWNNHQSNLLGVFSQLLHDESLVDVTLACSEGASIRAHKVVLSACSSYFRSLFVDHPSRHPIVILKDVGLEELRTLVDFMYKGEVNVQYCQLPALLKTAESLQVKGLAEMTTLSAAGIETRKVAEPMEECQSQDTRESSESHEKVDGRDHRDKEDRRELKEAREGRDRENKDSRDVRESHTRDSRESRESREHREQREPRDLREPRDIRETRDPRDLRDPRDVREHRESRENRDIPRDLREVRDPRELRESRETRDSREMPEASPPRISPLLSVRRFRPETAAETLAPTHPPIPKDEPPDEPMRSSSPEEDTVSLRSNGAQNEPIGLNMTINSHSSSSVLGAHYSPVEPRLSVLNTIPHPGLTHPSHASLPSPRSEPIAGPSGLPPVQQVP…
>XP_026496930.1 [Vanessa tameamea]	MGSEHYCLRWNNHQSNLLGVFSQLLHDESLVDVTLACSEGASIRAHKVVLSACSSYFRSLFVDHPSRHPIVILKDVGLEELRTLVDFMYKGEVNVQYCQLPALLKTAESLQVKGLAEMTTLSAAGIDTRNVPEPMEECQQQDIRECTESHERLDERDTRDKEERREAKESREIRERDCKDIREGHRESRETRDLGGHRERDREREREPRDLIRETRDSRDLRDHRDSRDHRELRDVKDNREPRDLREIRDARDLRDARDQREAVEASPPRISPLLSVRRFRPETSIETPTLTHPPIPKDEPPDEPMRPSSPEDDSVSIRSNGANENVGINMIINSHGGLGPRYSPVEQRLSVLNTLPHPGLPHPSHSSLSSPRNEPIAGPSGLPPVQQVPLSLKKEADW…
>Bm-mamo-S	MGSEHYCLRWNNHQSNLLGVFSQLLHDESLVDVTLACAEGASIRAHKVVLSACSSYFRSLFVDHPSRHPIVILKDVGLEELRTLVDFMYKGEVNVQYCQLPALLRTAESLQVKGLAEMTTLNAAGIETRSVSEQREQGQSQDAREGPENHERLEGKEVRDNDRRDPKDLRDRDNKDLRDSHLRDCRESREQREHREQRESRDLREIRDLREMRELRDSREHRDLRESRDIRDPRDLRDVRDSREIRDVRDQRDTTESSPSRISPLLTVRRFRTETSTETQSLVHPPLPKDEPPDEPMPSSSPEDDSASLRSNGAQNESMGINMTINSHNTGVLSTRYSPVERMSVLNAIPHPGLPHPSLPSLSSPRSEPIPGPSGLPPVQQAPLSLKKELVDWDRNNED…
>Dm-mamo-PE	MGSEHYCLRWNNYQSNLLGVFSQLLQDGSLVDVTLVCSEGTSIRAHKVVLSACSSYFQSLFLEHPEGHLIVILKDVRFAELQTLVEFMYKGEVNVQYCQLSALLKTAESLKVKGLAEMTNQNTTLREPEREPDRLRPQGGGGSGGSAHKAADSPAAALDATAATQAATATATATAAAATSTSTSATSAAATAAATAATSASTTATAAAGSSNTTTTTAATTTATCATAATSTAATSSSSSVTSAAAAAAAAASASGVAHSEEATSSSSSTGGQKREASDRSSPTPAKRSSRMHPADKVDVAEDREQEQNQADELLSEELLGRNLKDEEDDDVDELDENEETKLRGRDEDDDDEDEEEDTPMPLDLYQRPNVEPKSAAAATAAQQGGSNSLSGSSNACHT…
>KAH1028932.1 [Dendroctonus ponderosae]	MGSEHYCLRWNNHQANLLGVCAQLLRDERLVDVTLACADEGRCIRAHKVVLSACSAYFRALFVDHPARHPIVILKDVRFSDLRTIVEFMYKGEVRVEYAQLNRLLQTAESLKVKGLAEMTQEYKPDPPEQTEPEELVSRRPPSLGTGDPTPPRNSPVAAVPPPRQSPEPLPRPPSQNGSPEPPLPPTNSFGPPPTLVGCRPSPPLNCDPLPGPSNLPPIQQVPLSLKKEVDWGGGLEDKNSGGESSSEYSRMPHDSERPDDGADAPGASSSPPRIYPCMYCGISFPHQSKLTRHILSHSLETLKYREQRGMPSLSIPEPAATSWVDARSEPPDPTDQPPTPMDLDDAASPGGVVLCKFCGKSFPDVAALIAHLPAHTGDRPFKCEFCGKAFKLRHHMKD…
>XP_028030952.1 [Bombyx mandarina]	MGSEHYCLRWNNHQSNLLGVFSQLLHDESLVDVTLACAEGASIRAHKVVLSACSSYFRSLFVDHPSRHPIVILKDVGLEELRTLVDFMYKGEVNVQYCQLPALLRTAESLQVKGLAEMTTLNAAGIETRSVSEQREQGQSQDAREGPENHERLEGKEVRDRDDRREPKDLRDRDNKDLRDSHLRDCRESREQREHREQRESRDLREIRDLREMRELRDSREHRDLRESRDIRDPRDLRDVRDSREIRDVRDQRDTTESSPSRISPLLTVRRFRTETSTETQSLVHPPLPKDEPPDEPMPSSSPEDDSASLRSNGAQNESMGINMTINSHNTGVLSTRYSPVERMSVLNAIPHPGLPHPSLPSLSSPRSEPIPGPSGLPPVQQAPLSLKKELVDWDRNNE…
>Bm-mamo-L	MGSEHYCLRWNNHQSNLLGVFSQLLHDESLVDVTLACAEGASIRAHKVVLSACSSYFRSLFVDHPSRHPIVILKDVGLEELRTLVDFMYKGEVNVQYCQLPALLRTAESLQVKGLAEMTTLNAAGIETRSVSEQREQGQSQDAREGPENHERLEGKEVRDNDRRDPKDLRDRDNKDLRDSHLRDCRESREQREHREQRESRDLREIRDLREMRELRDSREHRDLRESRDIRDPRDLRDVRDSREIRDVRDQRDTTESSPSRISPLLTVRRFRTETSTETQSLVHPPLPKDEPPDEPMPSSSPEDDSASLRSNGAQNESMGINMTINSHNTGVLSTRYSPVERMSVLNAIPHPGLPHPSLPSLSSPRSEPIPGPSGLPPVQQAPLSLKKELVDWDRNNED…
>Dm-mamo-PI	MGSEHYCLRWNNYQSNLLGVFSQLLQDGSLVDVTLVCSEGTSIRAHKVVLSACSSYFQSLFLEHPEGHLIVILKDVRFAELQTLVEFMYKGEVNVQYCQLSALLKTAESLKVKGLAEMTNQNTTLREPEREPDRLRPQGGGGSGGSAHKAADSPAAALDATAATQAATATATATAAAATSTSTSATSAAATAAATAATSASTTATAAAGSSNTTTTTAATTTATCATAATSTAATSSSSSVTSAAAAAAAAASASGVAHSEEATSSSSSTGGQKREASDRSSPTPAKRSSRMHPADKVDVAEDREQEQNQADELLSEELLGRNLKDEEDDDVDELDENEETKLRGRDEDDDDEDEEEDTPMPLDLYQRPNVEPKSAAAATAAQQGGSNSLSGSSNACHT…
>NP_001317554.1 [Homo sapiens]	MDPVATHSCHLLQQLHEQRIQGLLCDCMLVVKGVCFKAHKNVLAAFSQYFRSLFQNSSSQKNDVFHLDVKNVSGIGQILDFMYTSHLDLNQDNIQVMLDTAQCLQVQNVLSLCHTFLKSATVVQPPGMPCNSTLSLQSTLTPDATCVISENYPPHLLQECSADAQQNKTLDESHPHASPSVNRHHSAGEISKQAPDTSDGSCTELPFKQPNYYYKLRNFYSKQYHKHAAGPSQERVVEQPFAFSTSTDLTTVESQPCAVSHSECILESPEHLPSNFLAQPVNDSAPHPESDATCQQPVKQMRLKKAIHLKKLNFLKSQKYAEQVSEPKSDDGLTKRLESASKNTLEKASSQSAEEKESEEVVSCENFNCISETERPEDPAALEDQSQTLQSQRQYACEL…
>XP_001948243.2 [Acyrthosiphon pisum]	MGSEHYCLRWNNHQNNLLGVFSQLLQEESLVDVTLACSEEGRLIRAHKVVLSACSAYFKALFLDHPTRHPIVVLKDVQFSELRDLVEFMYRGEVNVDHRQLTTLLKTAESLKVKGLADMARPSDGDDDTVGDRVELVPADRDDEPMEPEDLRPLSRCRTPVPAESRTPSPPPTESDDNLSMQSEPSDMTTVCRHDDQPSPSGSGLPPVQQVPLFLKKEADCDKTDDRSIQGESSSEFRSIPDPEVCLVEGVFNTLAAYRSQVSVLQQGFSAFSRFSTLPPVYNTETSVSLYSVLQQQGLIGPCVSSSDEVASRCLIRCAICLAGFPSTWLLEQHTALQHTGQPVRGHGGDGGDEKPFQCDQCGQSYRYRSAYLKHREQNHRARLPADKLFTCDICGMQF…
>XP_006562717.2 [Apis mellifera]	MGSEHYCLRWNNHQSNLLGVFSQLLESESLVDVTLACTEGPSIRAHKVVLSACSSYFQALFLDHPNRHPIVILKDVRFAELRTLVDFMYKGEVNVEYCQLSALLKTAESLKVKGLADMTNINAAVASRDEQQQQQQQQQQQQPQQQQQQQQQQQQQQQQQQQHTSTSEGIQRETSREHHRERESIKEASNKERDREGNASSSGGTGLPSGGGVKECEQSQQNVAQLPSSESAEAVDMTDCPPSPTGPGSPCPGPLALDRPRRDSEDAASLEETRGSLSPISVHSGPSDMSLSNNTGSTPGVLPLNLPQSRLPSPHSTEPLAGPSGLPPVQQVPLSLKKEMDWERSTEERSASSEISTDYRLPPDPVSLALGLEAGGWGALVERSTGGGGGSGSILGHGG…
>XP_014258550.1 [Cimex lectularius]	MGSEHYCLRWNNHQSNLLGVFSQLLEAESLVDVTLASSEGHSLRAHKVVLSACSSYFRALFLDHPARHPIVILKDVCFSELRTLVEFMYRGEVSVETCRLSALLKTAESLKVKGLAEMTALKAGGDDSHGGGEGNDGGGSPQHPAVVAQPIPAPDLPPPPPPPPSMEQQEEVRSPQGTTRDDDDASSVHSAPSDMTPPAPASPHSSEPVPGPSGLPPVQDAPLSLKKEVEWDRTDDKSMGETSSDYKLPHDPEVCLVEGEFGPGSSQSLDQISSSSRSSTPFQYPGLAGFAGLYGETVVSLLRAQGLDVPGVRCSVCLAAFPTTWLLDRHIQMQHPGHSSTRSPHTTEPMRDDKPFRCDQCGQSYRYRSAYIKHREQNHRARLPADKLFTCDVCGMQFR…
>XP_026280915.1 [Frankliniella occidentalis]	MGSGEHYCLRWNNHQSNLLGVFSQLLEDGSLVDVTLACAEEGHSIRAHKVVLSACSSYFQTLFIAHPARHPIVILKDVCFRELRTLVEFMYKGEVNVEYCRLSALLKTAESLKVKGLAEMTNLDKSHEKEAERDRDRDRDRDRDRDKEHDDKDRDQERERERERERDRDRDRERERERERERDRDRERDRERERERERERDRDREDKDRRRDRSDQQDREVNREDDVRQPQPPPPQEHPQSLVQRHRQSPSVSSPSPLPLSAPPRSSANGVSLLEPGELLLGLHGGVHPHPGVHVPLLAHPMPLPLPLTHHHSRLLNSSPDSPPLPAPALPPPPRPPSHSRSLSPSSGMSGPPSKRIARPLSRMESRMDHSRVESRIDHLRRGDSSPDYDCHDPDPGGP…
>EEZ97327.2 [Tribolium castaneum]	MHIIATSVDVDRPSSSPLERPSSTQSSRSSTPFALPFPSLPTSILEVGLIHPSLLGEEMFRCPSCMAAFPSIWLLEQHTALQHIGSLNSLEKPFICEQCGQSYRYRSAYVKHREQNHRARLPADKLFSCDVCGMQFRYLKSFKKHRLNHALEKLHGKSGDAGRVGALEESKSVDNSSDQVSSSNETIVLEGKDEGVVVKKEESMNDDAGEGASSDAEKPDADQDDTIDSMAVSYPVSSGTGLDILRSSHDSSIISFLRADAAEKQRERRFACPFCGKCVRSKENLKLHVRKHTGERPFVCLFCGRAFGGKSDLTRHLRIHTGERPYHCDMCGKCFARADYLSKHLTTHINTSR
>XP_032512905.1 [Danaus plexippus plexippus]	MGSEHYCLRWNNHQSNLLGVFSQLLHDESLVDVTLACSEGASIRAHKVVLSACSSYFRSLFVDHPSRHPIVILKDVGLEELRTLVDFMYKGEVNVQYCQLPALLKTAESLQVKGLAEMTTLSAAGIDTRNVPEPMDECQQRDTRECAESHETLDDQEERREAKEFRELRERESKDNRESHREIRDSRELREHRERERDRESRELIREIRDPRDPCRDHRELREVKDSRDPRDLRDTRDPRELRDSLDPREATEASPPRISPLLSVRRFRPDISIDTPTLTHPPIPKDEPPDEPIRPTSPEDDTISIRSNGASENMGINMTINSHGMGPRYSPVEQRLSVLNTLPHPGLTHPSHSSLSSPRNEPIAGPSGLPPVQQVPLSLKKEADWDRGNDEKVGETDY…
>XP_046463562.1 [Daphnia pulex]	MGSPNEAAAQPGPGTGGPPSGDGGGPDGVGGETTHHDGGSDAPAPPPPPQPTLAANNNEDNNIRSNSSSPSSETTESTGSSSSTTSSATAVATTTTNTTTSPGRRANGKHGGRRWKAEHQPLRKASMEEEEDEDEEEEEENEQDDRIRPAPLPVVETESCSALPRPEVVVTPSRTNVIHTSEESDEDDGMVDLDRKLTPSPPLPAAAAGQKPEQQQQQDHYCLRWTNHGSHVLGVFAQLLRDESLVDVTLAAEGRSLRAHKMVLSACSSFFRTLFVSHSDQRHPIVILKDTKFTELESLLQFMYKGEVSVEYGQLATLLKTAENLRVKGLADVTTTATAAPKAKAEVEEEEEEDEEDDEEDEEDDEEEEDEVVDMFDQELEDATNPNPIVIERNALTSG…
>XP_044573509.1 [Drosophila ananassae]	MGSEHYCLRWNNYQSNLLGVFSQLLQDGSLVDVTLVCSEGTSIRAHKVVLSACSSYFQSLFLEHPERHPIVILKDVRFAELQTLVEFMYKGEVNVQYCQLSALLKTAESLKVKGLAEMTNQNTTLREPEREPDRLRPQGGGGGSGGGVASAHKAADSPATALDATAATQAAAATSAATATATATAAAATSTSATSAAGAGTGTGTGTGTAAGSSSSTTSTTTSSSTTTSCATAATSTAGAAAPSAAAAATSAEEATSSSSSSTQPGQKREASDQSSPTPAKRSSRHQDASEDALDTHSGKEHVQPADELLQEELLAGGRNEEDEDAVEEVDELDENEDFEDALREQERDPEHEDDEDEEDTPMPLDLYHRPAVEAKVAGSNQSGSTTSNTNATTTRNIN…
>XP_012215939.1 [Linepithema humile]	MGSEHYCLRWNNHQSNLLGVFSQLLESESLVDVTLACTEGPSIRAHKVVLSACSSYFQALFLDHPNRHPIVILKDVRFAELRTLVDFMYKGEVNVEYCQLSALLKTAESLKVKGLADMTNINAAVASREEQQQQQQQQQQQSQQQQQQHTSASDTSREHHRERERERERDRDRERDRERERERERERERERDRDRDRDRDRDRDRESIKETSGKDRERESNVAGVSAGAKECEQQQQQQQQQQQQQQQQPSSIAQNTPSESVDAVDMTDCPPSPAGPGSPCPGPLALDRPRRDSEDAASLEETRAGSLSPISVHSGPSDMSLSNNTGGGAPGGVLPLNLPQSRLPSPHSTEPLAGPSGLPPVQQVPLSLKKEMDWERSTEERSASSEISTDYRLPPDPV…
>XP_005191343.1 [Musca domestica]	MATRCPTPFAFPFTPLGLSLFDIDPSRILTMLHHQTWLAEEALRNRGLLTPPPTTSKDFSHRYNPLSDLLSKEYHPSHMHHLNTADLQTRSSSSSTPSNMGGVGPNDLVSKQQQHRSIPQQQQYKQQPPFNIRYPSPSAFFHHQQQQQQSTHLSQQLQPQKLIKLSRQNTPSPHQSNTSGPLHKISERSVTPCHPSKEDNDSDAPIEMTTTHHDEAAAIRDRDSGNSSAATTSSITSSMIYKDSLEQLLQRRHSGPTLAAEAGLKTYSQILMNSSTPTDTSSCKEKSSSSSTSSTPPPAPGTPGQLSLSRSSMLKSPSDTSSLFSEPIEEETRCVVCNAHFPNVWLLEQHAALQHPLLGPGEEKPFICEQCGQSYRYRSAYAKHKETNHRSRLPADKLF…
>XP_016839272.1 [Nasonia vitripennis]	MGSEHYCLRWNNHQSNLLGVFSQLLESESLVDVTLACTEGPSIRAHKVVLSACSSYFQALFLDHPNRHPIVILKDVRFAELRTLVDFMYKGEVNVEYCQLSALLKTAESLKVKGLADMTNINAAAVQSSKEEEQQSPPQAQLPAQQQQQPQQQQQSTTGTSSSSTTTTTTTTTATATALTTPAANEPMLQDAQDERLHQHHHQHHQHSGTGRSSDSKDSRERNNDRDRDCRDRDRDRERDREKERDKRDTSSRERELQQQQQQALAQQQRDREQRERDREHNLSVNECSTDDVEISECPASPPTSATTRTSRGAASSPCPGPLALDRPRSRRDSDSAASLEETRGSLSPLSVHSGPSDMSLSNNNSSAGAGGIGGGVTPVTIPISSLPQSRLPSPHSTE…
>XP_050060583.1 [Aphis gossypii]	MGSEHYCLRWKNHQNNLLGVFSQLLQEESLVDVTLACSEEGRLIRAHKVVLSACSAYFKALFLDHPTRHPIVVLKDVQFSELRDLVEFMYRGEVNVDHRQLTTLLKTAESLKVKGLADMARPSDGDDDTVGDRVELVPADRDDEPMEPEDLRPLSRCRTPVPAESRTPSPPPTESDDNLSMQSEPSDMTTVCRHDDQPSPSGSGLPPVQQVPLFLKKEADCDKTDDRSIQGESSSEYRSIPDPEVCLVEGVFNTLAAYRSQVSVLQQGFSAFSRFSTLPPVYNTETSVSLYSVLQQQGLIGPCVSSSDEVASRCLIRCAICLAGFPSTWLLEQHTALQHTGQPVRGHGGDGGDEKPFQCDQCGQSYRYRSAYLKHREQNHRARLPADKLFTCDICGMQF…
>XP_026677926.1 [Diaphorina citri]	MFSLQEVTLTEGAFESAALALRRTPLFDQISNSSATSSRPSTPAFQFPPFPPFAGLANFADSPISIYTFLQQQGLIGGPRHRSEEGFSSTLIRCAICWAGFPTTWLLEQHTALQHSGQPVRGKTEEGPDDDSGEDKPFRCEQCGQSYRYRSAYLKHREQNHRARLPADKLFTCDVCGMQFRYLKSFKKHRLNHALERLHNPFRPDSTAHPQSTTPSSTSGSVSGRTTAPPVTSTSESQVSSSNEAVRPSSVPPTPDSSGPTNLSTSNETAVDTLALAIGASEASLFNLLRLSSERQRERRTFACPFCGKCVRSKENLKLHVRKHTGERPFACLFCGRAFGGKSDLTRHLRIHTGERPYHCEMCGKCFARADYLSKHLTTHIHNSQHQRGRDPRERSSES…
>XP_025195062.1 [Melanaphis sacchari]	MGSEHYCLRWNNHQNNLLGVFSQLLQEESLVDVTLACSEEGRLIRAHKVVLSACSAYFKALFLDHPTRHPIVVLKDVQFSELRDLVEFMYRGEVNVDHRQLTTLLKTAESLKVKGLADMARPSDGDDDTVGDRVELVPADRDDEPMEPEDLRPLSRCRTPVPVESRTPSPPPTESDDNLSMQSEPSDMTTVCRHDDQPSPSGSGLPPVQQVPLFLKKEADCDKTDDRSIQGESSSEYRSIPDPEVCLVEGVFNTLAAYRSQVSVLQQGFSAFSRFSTLPPVYNTETSVSLYSVLQQQGLIGPCVSSSDEVASRCLIRCAICLAGFPSTWLLEQHTALQHTGQPVRGHGGDGGDEKPFQCDQCGQSYRYRSAYLKHREQNHRARLPADKLFTCDICGMQF…
>XP_022183752.1 [Myzus persicae]	MGSEHYCLRWNNHQNNLLGVFSQLLQEESLVDVTLACSEEGRLIRAHKVVLSACSAYFKALFLDHPTRHPIVVLKDVQFSELRDLVEFMYRGEVNVDHRQLTTLLKTAESLKVKGLADMARPSDGDDDTVGDRVELVPADRDDEPMEPEDLRPLSRCRTPVPAESRTPSPPPTESDDNLSMQSEPSDMTTVCRHDDQPSPSGSGLPPVQQVPLFLKKEADCDKTDDRSIQGESSSEYRSIPDPEVCLVEGVFNTLAAYRSQVSVLQQGFSAFSRFSTLPPVYNTETSVSLYSVLQQQGLIGPCVSSSDEVASRCLIRCAICLAGFPSTWLLEQHTALQHTGQPVRGHGGDGGDEKPFQCDQCGQSYRYRSAYLKHREQNHRARLPADKLFTCDICGMQF…
>XP_039298489.1 [Nilaparvata lugens]	MGSEHYCLRWNNHQSNLLGVFSQLLQDESLVDVTLACSEGLSIRAHKVVLSACSSYFRSLFVDHPNRHPIVILKDVCFAELRTLVEFMYRGEVNIEYCQLSALLKTAESLKVKGLAEMTHLRSADADDSTDARSRDERSGGGGGGADTRTTISAADDVRPPPQQMSPSPPPSSTTASATATAPPQPPPAVTALSLKRPPPADSESPPPPRQPPSPQLNVTAADMDNNTMDETMTPDQSRSPEPRCDDDDSRSSMQSSGPSDMTYRSAPLPPLPPHSPLAGPSGMPPVQQVPLSLKKEVDWDRNDDKSTTGESSSDYRHPHDPEVCLVEGVYAPHSRCMPFDQLSGSSSRSSTPFGAPWGALLPPGGGDSPSGHPVSLFGLLQHQGMLIEHLLPSAGAAG…
>XP_026807933.1 [Rhopalosiphum maidis]	MGSEHYCLRWNNHQNNLLGVFSQLLQEESLVDVTLACSEEGRLIRAHKVVLSACSAYFKALFLDHPTRHPIVVLKDVQFSELRDLVEFMYRGEVNVDHRQLTTLLKTAESLKVKGLADMARPSDGDDDTVGDRVELVPADRDDEPMEPEDLRPLSRCRTPVPAESRTPSPPPTESDDNLSMQSEPSDMTTVCRHDDQPSPSGSGLPPVQQVPLFLKKEADCDKTDDRSIQGESSSEYRSIPDPEVCLVEGVFNTLAAYRSQVSVLQQGFSAFSRFSTLPPVYNTETSVSLYSVLQQQGLIGPCVSSSDEVASRCLIRCAICLAGFPSTWLLEQHTALQHTGQPVRGHGGDGGDEKPFQCDQCGQSYRYRSAYLKHREQNHRARLPADKLFTCDICGMQF…
>XP_018328007.1 [Agrilus planipennis]	MGSEHYCLRWNNHQSNLLGVFSQLLRDESLVDVTLACSEGHSIRAHKVVLSACSSYFQTLFLDHPSRHPIVILKDVHFSELRTLIEFMYKGEVNVEYCQLSALLKTAESLKIKGLAEMTQLGSSRDFKPNDIEAEQKEPKELVLKRPLEDQDQSHSQTPPRICRTPDRPPSVENIRTTSTPREECGPSDMSLHSNNNPITNCPALGAGPPSSRLPSPSINDEPLPGPSGLPPVQVAPLSLKKEADWGGGGGGGGGGGGGQTNDSTAGEGSSEFNRPPHDSNLLDPDRNFSFDRPSSAHSSRSSTPFVLPFPTLASSLLEVGLVHPALIGDEMFRCSVCMAAFPSVWLLEQHTALQHMSTLSTVDKPFVCEQCGQSYRYRSAYVKHREQNHRARLPADKL…
>XP_048516829.1 [Dendroctonus ponderosae]	MGSEHYCLRWNNHQANLLGVCAQLLRDERLVDVTLACADEGRCIRAHKVVLSACSAYFRALFVDHPARHPIVILKDVRFSDLRTIVEFMYKGEVRVEYAQLNRLLQTAESLKVKGLAEMTQEYKPDPPEQTEPEELVSRRPPSLGTGDPTPPRNSPVAAVPPPRQSPEPLPRPPSQNGSPEPPLPPTNSFGPPPTLVGCRPSPPLNCDPLPGPSNLPPIQQVPLSLKKEVDWGGGLEDKNSGGESSSEYSRMPHDSPVMDVEQRSSSSLERPPSSASSRASTPGASLLHFPLAGLLEAGLVPPLDSLGPAAFRCGACLAGFPSPWLLEQHAALQHLPGAAGPDKPFVCDQCGQSYRYRSAYVKHREQNHRARLPADKLFSCDVCGMQFRYLKSFKKHRL…
>XP_023019928.1 [Leptinotarsa decemlineata]	MGSEHYCLRWNNHQSNLLGVFSQLLRDESLVDVTLACSEGHSIRAHKVVLSACSSYFQTLFVDHPSRHPIVILKDVRFAELRTLIEFMYKGEVNVEYCQLSALLKTAESLKVKGLAEMTREYKPLPEQLEPKELTTRRAVTPDEMEESQHSPSSVQNLRICKSPLERDRDRDRDRERDRERDKVKDEKRSPSVENTPLPASSDCGASDMTIHNSNNLAATCSSISQPPICSRLPSPLNCEPLPGPSNLPPVQQVPLSLKKEVDWGGGGGSEEAKPLGDSASDYSRNPQDSTSMEVDRCIGSPVPDRPSSTQSSRSSTPFALPFPTIPTSLLEVGLMHPALLGEEMFRCSSCMAAFPSLWLLEQHTALQHIGSISSLDKPFVCEQCGQSYRYRSAYVKHR…
>XP_046595062.1 [Neodiprion lecontei]	MGSEHYCLRWNNHQSNLLGVFSQLLESESLVDVTLACTEGPSIRAHKVVLSACSSYFQALFLDHPNRHPIVILKDVRFSELRTLVDFMYKGEVNVEYCQLSALLKTAESLKVKGLADMTNINAAASSRDELDQQQQQQQQQQHHQQQQQQQQQQQQQQQQQQQQQQHLANENQRDREHRERDRDKERERERDRDRERERERERERERERERERERDRETEVECEQSQPQQLSDVMEAVHMTECPPSPTGPGSPCPGPLALHRTRRNSDDAASLEETRGSLSPISVHSGPSDMSLSNNTAGATAGGIIPLQLPQSRLPSPHSTEPLAGPSGLPPVQQVPLSLKKEVDWERSTDDRVSNIEATTDYRLPPDPVSLALGLEVGGWGALMERSSSAAHGSLFP…
>XP_011351469.1 [Ooceraea biroi]	MGSEHYCLRWNNHQSNLLGVFSQLLESESLVDVTLACTEGPSIRAHKVVLSACSSYFQALFLDHPNRHPIVILKDVRFAELRTLVDFMYKGEVNVEYCQLSALLKTAESLKVKGLADMTNINAAVASRDEQQQQQQQQQQQQQQQQQQQHTSSSDTSREHHRERERERERDRDRDRDRDRDRDRDSIKETSGKDRERETNVAGGLSVKECEQQQQQQQQSQQQQQQQQPSITQNTPSEPTEAVDMTDCPPSPAGPGGSPCPGPLALDRPRRDSEDAASLEETRAGSLSPISVHSGPSDMSLSNNTGGGAPGGVLPLNLPQSRLPSPHSTEPLAGPSGLPPVQQVPLSLKKEMDWERSTEERSVSSEISADYRLPPDPVSLALGLEAGGWGALVERTSGA…
>XP_023289901.1 [Orussus abietinus]	MGSEHYCLRWNNHQSNLLGVFSQLLESESLVDVTLACTEGPSIRAHKVVLSACSSYFQALFLDHPNRHPIVILKDVRFAELRTLVDFMYKGEVNVEYCQLSALLKTAESLKVKGLADMTNINAAVASREEQHLATGPEGLRDREHRDREKDKDRDQRDRDPKDCEQPPQLQLQPQLRPPSEAAAAAAAAAAAAAVAASDAADLMAECPASPAAGPGPLALDRPRRDSDDAASLEETRGSLSPVSVHSGPSDMSLSNNTAAPGVLPLSLPQSRLPSPHSTEPLAGPSGLPPVQQVPLSLKKEVDWERSTEERSASSEISTDYRLPPDPVSLALGLEAGGWGALVERAPTPTGGGGGGSPSLLTPGGFAAGLAAGLARRCGVCLASFPSAWLLERHALLQH…
>XP_018349523.1 [Trachymyrmex septentrionalis]	MGSEHYCLRWNNHQSNLLGVFSQLLESESLVDVTLACTEGPSIRAHKVVLSACSSYFQALFLDHPNRHPIVILKDVRFAELRTLVDFMYKGEVNVEYCQLSALLKTAESLKVKGLADMTNINAAVASREEQQQQQQQQQQQQQQQQQQQQQHTSTSDTSREHHRERERERERERESIKETSGKERERESNVTTGVSAGAKECEQQQQQQQQQQQQQQQQSSSIVQSTPSETTEAVDMTDCPPSPAGPGSPCPGPLALDRPRRDSEDAGSLEETRAGSLSPISVHSGPSDMSLSNNTGGAPGGGVLPLNLPQSRLPSPHSTEPLAGPSGLPPVQQVPLSLKKEMDWERSTEERSASSEISADYRLPPDPVSLALGLDAGGWGALVERTSAHGGTGSTILG…
>XP_030025549.2 [Manduca sexta]	MGSEHYCLRWNNHQSNLLGVFSQLLHDESLVDVTLACSEGASIRAHKVVLSACSSYFRSLFVDHPSRHPIVILKDVGLEELRTLVDFMYKGEVNVQYCQLPALLKTAESLQVKGLAEMTTLSAAGIDTRSVPEPMDECQGQDTKECPELHDRLDGRENREKDERRDIKDSRDRESKESRDSRESHTREPRESREHREQRESREMREPRDLREIREPRDARDLRESRELREHRDLREAREIREPRDLREVRDPRDPRDIRDQRETTETSPSRISPLLSVRRFRTETSTENPTPTHPPLPKDEPPDEPMRSSSPEDDSVSIRSNGAQNENVGINMTINSHSSVLGARYSPVERLSVLNTIPHPGLPHPSHPSLPSPRSEPIPGPSGLPPVQQAPLSLKKEL…
>XP_031332306.1 [Photinus pyralis]	MGSVHYCLRWNNHQSNLLGVFSQLLRDESLVDVTLACSEGHSIRAHKVVLSACSSYFQTLFVDHPSRHPIVILKDVRFAELRTLIEFMYKGEVNVEYCQLSALLKTAESLKIKGLAEMTNLGPSRDYKQDSQNEQTEPTELVNKESTNEEQERAETPPRICRTPERPASREPLRSTPPTPEDCGRNDMTLHSTNNLVTCSSVPGSTICSRISSPLNCEPVPGPSGLPPVQQVPLSLKKEVDWGGGCADDKNTRESPSDYARHPHDPSLKKEVDWGGGATEDKKSSIENYSEYSRHPHDSSAVEVERCLASPCMERPSSTHSSRSSTPFAFPIPSMATSLLEVGLVHPALLGEEIFRCTICMAAFPSVWLLEQHTALQHLGVLGAVDKPFICDQCGQSYR…
>XP_028030948.1 [Bombyx mandarina]	MGSEHYCLRWNNHQSNLLGVFSQLLHDESLVDVTLACAEGASIRAHKVVLSACSSYFRSLFVDHPSRHPIVILKDVGLEELRTLVDFMYKGEVNVQYCQLPALLRTAESLQVKGLAEMTTLNAAGIETRSVSEQREQGQSQDAREGPENHERLEGKEVRDRDDRREPKDLRDRDNKDLRDSHLRDCRESREQREHREQRESRDLREIRDLREMRELRDSREHRDLRESRDIRDPRDLRDVRDSREIRDVRDQRDTTESSPSRISPLLTVRRFRTETSTETQSLVHPPLPKDEPPDEPMPSSSPEDDSASLRSNGAQNESMGINMTINSHNTGVLSTRYSPVERMSVLNAIPHPGLPHPSLPSLSSPRSEPIPGPSGLPPVQQAPLSLKKELVDWDRNNE…
>NP_001341680.1 PLZF [Homo sapiens]	MDLTKMGMIQLQNPSHPTGLLCKANQMRLAGTLCDVVIMVDSQEFHAHRTVLACTSKMFEILFHRNSQHYTLDFLSPKTFQQILEYAYTATLQAKAEDLDDLLYAAEILEIEYLEEQCLKMLETIQASDDNDTEATMADGGAEEEEDRKARYLKNIFISKHSSEESGYASVAGQSLPGPMVDQSPSVSTSFGLSAMSPTKAAVDSLMTIGQSLLQGTLQPPAGPEEPTLAGGGRHPGVAEVKTEMMQVDEVPSQDSPGAAESSISGGMGDKVEERGKEGPGTPTRSSVITSARELHYGREESAEQVPPPAEAGQAPTGRPEHPAPPPEKHLGIYSVLPNHKADAVLSMPSSVTSGLHVQPALAVSMDFSTYGGLLPQGFIQRELFSKLGELAVGMKSES…
>NP_001124317.1 Bcl6 [Homo sapiens]	MASPADSCIQFTRHASDVLLNLNRLRSRDILTDVVIVVSREQFRAHKTVLMACSGLFYSIFTDQLKCNLSVINLDPEINPEGFCILLDFMYTSRLNLREGNIMAVMATAMYLQMEHVVDTCRKFIKASEAEMVSAIKPPREEFLNSRMLMPQDIMAYRGREVVENNLPLRSAPGCESRAFAPSLYSGLSTPPASYSMYSHLPVSSLLFSDEEFRDVRMPVANPFPKERALPCDSARPVPGEYSRPTLEVSPNVCHSNIYSPKETIPEEARSDMHYSVAEGLKPAAPSARNAPYFPCDKASKEEERPSSEDEIALHFEPPNAPLNRKGLVSPQSPQKSDCQPNSPTESCSSKNACILQASGSPPAKSPTDPKACNWKKYKFIVLNSLNQNAKPEGPEQAE…
