# Supplementary material for: The BTB-ZF gene Bm-mamo regulates pigmentation in silkworm caterpillars
Source: eLife. 2024 Apr 8;12:RP90795. doi: 10.7554/eLife.90795 (PMC11001300; doi:10.7554/eLife.90795)
Supplement: Figure 9—figure supplement 3—source data 1. [file elife-90795-fig9-figsupp3-data1.xlsx]

## Sheet: Sheet1
Figure 9-figure supplement 3-source data 1
Position	Sequences
Up-stream	TTTAATTTGGCTTAAGTTACTAAGGGGTACTAATAGTTTGAGCGCAGTGCATGTCATGGGGACATGTGCAATTGTGTGTAAGCGGGAAGTGATCGCGGCCTTCCGAATTTGGCCATGCCAAATAATCCCAGCTCGAAAGGAGGGGACCCGGCGGTCAGGGCCATGGACATTGAACTTGAAAAAAAAAAAAACACAAAAATATATAACACAAAACGGAAAATGCTGTGTACCGCTTATGTTAGAGAAGTTGAGCAACGGGTTTTTCGTTTTGCAGTCACGATGGATTTCCAAATTAGTGTAGGAGGGGGGAGGGGAGGGAGGGAGATAATGTCCAGGCTGCCATAAGTGGGGAATAAGGAAAATAAAACATGAAACACGGGTCGGGCAATGTCATGCGGT…
exon-1	CTGTTCCAGGACAAAGGGTGGATCCTTGTGACCCTGATCACCTTGGTGACGCCGTCTTGGGCTGCTTACAAACTTCAGGAGCGATATAGTTGGAGCCAGCTGGACTTTGCTTTCCCGAATACCCGACTAAAGGACCAAGCTCTGGCTAGTGGAGATTATATTCCGCAAAATGCTCTACCTGTTGGAGTCGAACACTTTGGCAATCGGTTATTCGTCACTGTTCCCCGCTGGCGTGAT
intron-1	GGTAAGTGGAAGTTAAATATGAAGCCCTTGGGGAGATCGTAAATGGGACATTCTTACTTAGGGCATCAGAGATATCTGATTGAGTGGTTGACAGTTTTATATGGCTTGTTTGACATGATGTAAAAACACAAAATTCATTTAGTTTAGGTATTCAAATAAGAGCTTGTTATTTATTTTAGAATTTGGAGAACATTTTTTTGTCTTTCTACCCTTCTTAGAAAATAATATTGTTTTGTACAATTTAATTTTAAACTAGTACAGACGAAAAATGTATTTTTTTATTTGTATGCCTTTTCACCATTTTGGCAGAGGAATAAATATGACAATATATTTTGAGAGCACCCTCATGTAAAGGTTTTAGCGTGGCGACCTCTCATAAATCCGGTTGGTACCTGCGCG…
exon-2	GGGATTCCGGCCACTCTGACCTATATAAACATGGACCGCAGTTTGACGGGTTCACCGGAGCTAATTCCGTATCCAGATTGGCGCTCAAATACAGCTGGAGATTGCGCCAACAGTATTACCACTGCCTACCGCATTAAAGTGGATGAGTGTGGTCGGCTGTGGGTTTTGGACACTGGAACCGTGGGCATCGGCAATACCACCACTAATCCGTGCCCCTATGCGGTAAATGTCTTTGACTTGACCACGGATACGCGAATTCGGAGATACGAGCTACCTGGCGTGGACACAAATCCAAATACTTTCATAGCTAACATTGCCGTGGATATAGGCAAAAATTGCGATGATGCATATGCCTATTTTGCCGATGAATTGGGATACGGCTTGATTGCTTACTCCTGG…
