# Supplementary material for: The BTB-ZF gene Bm-mamo regulates pigmentation in silkworm caterpillars
Source: eLife. 2024 Apr 8;12:RP90795. doi: 10.7554/eLife.90795 (PMC11001300; doi:10.7554/eLife.90795)
Supplement: Figure 12—figure supplement 1—source data 1. [file elife-90795-fig12-figsupp1-data1.xlsx]

## Sheet: Sheet1
Figure12-figure supplement 1-source data1
Name	sequences
>BomW3	GGTCCGTACTCTCCCTTAAACAGAATCCTTTGGGACTACTATAATGTCCACGGTAGCGCGGTCTCCGTCAATGTTCGTTCGGAGTTGTCCGATTGCGCTGAATTAATTTTAAGTGAACTTGATGTTTTTTCTAACTGTCTCACAACTTCAGGAAAATCTGTTGCGTATCATTTCCCAATTAAATATAAATTAATCTTAAGAAATCAATCAAATGCAATCAAATCTTAGTTATATAATATTTTTATTTTTGTTGTTAATGCATTGTCGATTGCACCTATAATTGAGGTGACATCTGCCATGAACTTTTGTCAGTTTGTCAATGTTTTGTATTGATGATCACTTTGTTGGTGCAACTTAATATATAAATAAATAAATAAAATAAAACTTGTGTTCAGACGT…
>BomW15	GGTCCGTACTCTCCCTTAAACAGAATCCTTTGGGACTACAATAATGTCCACGGTAGCGCGGTCTCCGTCAATGTTCGTTCGGAGTTGTCCGATTGCGCTGAATTAATTTTAAGTGAACTTGATGTTTTTTCTAACTGTCTCACAACTTCAGGAAAAATCTGTTGCGGATCATTTCCCAATTAAATATAAATTAATCTTAAGAAATCAATCAAATGTAATCAAATCTTAGTTATATAATATTTTTATTTTTGTTGTTAATGCATTGTCGATTGCACCTATAATTGAGGTGACATCTGCCATGAACTTTTGTCAGTTTGTCAATGTTTTGTATTGATAATCACTTTGTTGGTGCAAATTAATATATAAATAAATAAATAAAATAAAACTTGTGTTCAGACG…
>BomW16	AGCGCAATACTATCCCGTAAAACCAAAGTGGGGCTGGTACGTACATTGGTCTTCTCAATTTTTCTTTATGGCCCGAATCCTGACGATAAGACGAAGTGAGGCAAAGATCGCGCTTTTGAAATGTGGGGTTGAACGGAGTTGCGAATCCAAGACAGCGCCGAACTAACCATGATTTTGAAGGAGCTCGGTATTGCTACAAGGCTGTCCGCTATCTGCTTCCAACGTATTCTCGCGTACTTCGACCGCATTGCTCGTAAAGGCCCCGATAACTTGGAGAACTGATGTAGTTGGTCAGGTTGACGGGAGAATATCACGCGGACGCTTGCCTACCTGGTCTGATCTGCTTAAGATGTCTCCAGCCGCCAATAACTTAAAGGCTATAAATCCCAAGGACAGGAA…
>BomW17	GGTGCTGACTCTCCCTTAAACAGAATCCTTTGGGACTACAATAATGTCCACGGTAGCGCGGTCTCCGTCAATGTTCGTTCGGAGTTGTCCGATTGCGCTGAACTAATTTTAAGTGAACTTGATGTTTTTTCTAACTGTCTCACAACTTACAGGAAAAATCTGTCGCGGATCATTTCCCAATTAAATATTAATTAATCTTAAGCAATCAATTAAATGTAATCAAATCTTAATTATATAATCTTTTTATTTTTTTTTGTTAATGCATTGTCGATTGCACCTATAATTGAGGTGACATCTGCCATGAACTTTTGTCAGTTTGTCAATGTTTTGTATTGGTGATCACTTTGTTGGTGCAACTTAATATATAAATAAATAAATAAAATAAAACTTGTGTTCAGA…
>BomW37	ACCGCAATATATCCCGCAAAACCAAAGTGGGGCTGGTACGTACATTGGTCTTCTCAATTTTTCTTTATGGCGCCGAATCCTGGACGATAAGACGAAGTGAGAGAGCAAAGATCGACGCTTTTGAAATGTGGGGTTGGAGACGGATGTTGCGAATTCCATAGACAGCACGCCGAACTAACCTATCGATTTTGAAGGAGCTCGGTATTGCTACAAGGCTGTCCGCTATCTGCTTCCAACGTATTCTCGCGTACTTCGACCACATTGCTCGTAAAGGCCCCGATAACTTGGAGAAGCTGATGGTAGTTGGTCAGGTTGACGGGAGAATATCACGCGGACGCTTGCCTACCCTGGTCTGATCTGGTTAAGATGCTCTCCAGCCTGCCAATAACTGAGGCTATA…
>BomW40	GGTCCGTACTCTCCCTTAAACAGAATCCTTTGGGACTACAATAATGTCCACGGTAGCGCGGTCTCCGTCAATGTTCGTTCGGAGTTGTCCGATTGCGCTGAATCAATTTTAAATGAACATGATGTTTTTTCTAACTGTCTCACAACTTCAGGAAAAATCTGTTGCGGATCATTTCCCAATTAAATATAAATTAATCTTAAGAAATCAATCAAATGTAATCAAATCTTAATTATATAATCTTTTTATTTTTGTTGTTAATGCATTGTCGATTGCACCTATAATTGAGGTGACATCTGCCATGAACTTTTGTCAGTTTTTCAATGTTTTGTATTGGTGATCACTTTGTTCGTGCAACTTAATATATAAATAAATAAATAAAATAAAACTTGTGTTCAGACG…
>BomW43	GGTGCTGTACTTTCCTTGGTCTTAACTCAATTTTTCCTTATGGCGCCGAATCCTACAATAATGACCACGGGAGCGCAGGTCTCTCTTAAATGTGGGTTGCGGAGTTGCGAATTCCGATTGACGCCGAACTAAATTTTAAGTGAGCTTGATGTTTTTTCTGTCCGCTATCTCTTACAACTTCGCTACTTGACCAAATTGCTCGTAAAGCGCCCGATCATTTCCCAAGTAAATATGGTAATTGGTCGGTTAGGAGAATATCAGCGAGTTTACCCTGGTCTGATCTTAAGATGCCTAGCTGCCAATAATACTATAATTACGCGACTTTGGTTGATTAGGATGCATTGTCATCGAGTGGTCCACATTTTAGATTGAACGACCTTCAGTAATGAAGAGACCGGC…
>BomW45	GGCTCCAATGATTTCATTAAGCTAATGCAAAAGGTAACAAAAAATTATGACGTTAATATGGTATTATCAGACCAATACCCTGGCATAAATTCAAAAGAATTTAAAGAATTTCTAAAGAATAATAATATCAAAATAGTTTTCACAGCTGTTGATGCGCCTTTTTCAAATGGGCTTAACGAAAGATTAAATCAAACACTAACAAATAAGATAAGATGTAAAATAAACGAAAGCGATAAAAAGACATCTTGGACAACAATTGCACAAGAATGCGTAGAAAAATATAATGAAACAGAACACACAGTTACAAAGTTTGCTCCCAGGTACCTTCTAGAGGGTGAAAATGTGAGTATTCTACCACTACATTTGAAAACAAGTTGTACAACAGAAGATTTGAGAAGA…
>BomW46	GGTGCGTACTATCCCCGTAAACATAATCCTATATGGGACTTCACAATTTTTCTTAATGGCGCCGAATCCTACGGTAAGCTGAAGCAAAGGTCTCCGCTTTTGCAATGTTGGTTGCGGAGTCGAATGTCCATAGATTGCACGCTGAATTAACCTATGATTTTGAAGTGAGCTCGATGTTTTTTCTAAGGCTGTCCGCTATCTGCTTCCAAGAAAACTCCGTTGCGGACCTCATTCTTAAAGCCCCAATTAAAGCTATAAATTAATCTGGAGAATATCAATCAAACGCTTGCTACCTGGTCTATCTGGTTAAGATGCTCTTAGCCTGCCAATACCTAGGCTATAAATACCGCCGAGGACGGAAGACTTATGTAAGCTTGTCTCAATGGTCCACATTTTAGA…
>BomW47	TCCGCAATATATCCCGCAAAACCAAAGTGGGGCTGGTACGTACATTGGTCTTCTCAATTTTTCTTTATGGCGCCGAATCCTGGACGATAAAACGAAGTGAGAGAGCAAAGATCGACGCTTTTGAAATGTGGGGTTGGAGACGGATGTTGCGAATTCCATAGACAGCACGCCGAACTAACCTATCGATTCTGAAGGAGCTCGGTATTGCTACAAGGCTGTCCGCTATCTGCTTCCAACGTATTCTCGCGTACTTCGACCACATCGCTCGTAAAGGCCCCGATAACTTGGAGAAGCTGATGGTAGTTGGTCAGGTTGACGGGAGAATATCACGCGGACGCTTACCTACCCTGGTCTGATCTGGTTAAGATGCTCTCCAGCCTGCCAATAACTGAGGCTATA…
>BomW49	ACCGCAATATATCCCGCAAAACCAAAGTGGGGCTGGTACGTACATTGGTCTTCTCAATTTTTCTTTATGGCGCCGAATCCTGGACGATAAGACGAAGTGAGAGAGCAAAGATCGACGCTTTTGAAATGTGGGGTTGGAGACGGATGTTGCGAATTCCATAGACAGCACGCCGAACTAACCTATCGATTTTGAAGGAGCTCGGTATTGCTACAAGGCTGTCCGCTATCTGCTTCCAACGTATTCTCGCGTACTTCGACCGCATTGCTCGTAAAGGCCCCGATAACTTGGAGAAGCTGATGGTAGTTGGTCAGGTTGACGGGAGAATATCACGCGGACGCTTGCCTACCCTGGTCTGATCTGGTTAAGATGCTCTCCAGCCTGCCAATAACTGAGGCTATA…
>BomW51	AGGATATGAAAACCCCGCAAACCAAATTGGGGCTGGTACGTACATTGGTCTTCTCAATTTTCTTTATGGCCCCGAATCCTTTGGGACGATAAGACGAAGTGGAGCGCAAAGATCGACGTAAATGTGCGGTTGAACGGAGTTGCGAATTCCATAGATTGCACGCCGAATTAATCCTAATTTGAAGGAGCTTGGTTTTTGCTAAGGCTGTCTCACAACTTCGGAAAAATCTGTTGCCGACGTATCATACTTCACCAATTGCTCGTAAAATAATAAAGCTGATGTAGTCTTAGGAGAATATCACGCGGACGCTTGCCAAATGGTCTAATCGTTAACTCTTGAGTTAACTAGGCTATAAATCCGCCGAGGACAGGTTTACGTAGATGCATTGTGCATCGAGTG…
>BomL10	GGTGCGTACTCTCCCTTAAACAGAATCCTTTGGGACTACAATAATGACCACGGTAGCGCGGTCTCCGTCAATGTTCGTTCGGAGTTGTCCGATTGCGCTGAACTAATTTTAAGTGAACTTGATGTTTTTTCTAACTGTCTCACAACTTCAGGAAAATCTGTTGCGGATCATTTCCCAATTAAATATAAATTAATCTTAAGAAATCAATCAAATGTAATCAAATCTTAATTATATAATCTTTTTATTTTTGTTGTTAATGCATTGTCGATTGCACCTATAATTGAGGTGACATCTGCCATGAACTTTTGTCAGTTTGTCAATGTTTTGTATTGGTGATCACTTTGTTGGTGCAACTTAATATATAAATAAATAAATAAAATAAAACTTGTGTTCAGACGT…
>BomL100	GGTGCGTACTCTCCCTTAAACAGAATCCTTTGGGACTACAATAATGACCACGGTAGCGCGGTCTCCGTCAATGTTCGTTCGGAGTTGTCCGATTGCGCTGAACTAATTTTAAGTGAACTTGATGTTTTTTCTAACTGTCTCACAACTTCAGGAAAATCTGTTGCGGATCATTTCCCAATTAAATATAAATTAATCTTAAGAAATCAATCAAATGTAATCAAATCTTAATTATATAATCTTTTTATTTTTGTTGTTAATGCATTGTCGATTGCACCTATAATTGAGGTGACATCTGCCATGAACTTTTGTCAGTTTGTCAATGTTTTGTATTGGTGATCACTTTGTTGGTGCAACTTAATATATAAATAAATAAATAAAATAAAACTTGTGTTCAGACGT…
>BomL193	GGTGCGTACTCTCCCTTAAACAGAATCCTTTGGGACTACAATAATGACCACGGTAGCGCGGTCTCCGTCAATGTTCGTTCGGAGTTGTCCGATTGCGCTGAACTAATTTTAAGTGAACTTGATGTTTTTTCTAACTGTCTCACAACTTCAGGAAAATCTGTTGCGGATCATTTCCCAATTAAATATAAATTAATCTTAAGAAATCAATCAAATGTAATCAAATCTTAATTATATAATCTTTTTATTTTTGTTGTTAATGCATTGTCGATTGCACCTATAATTGAGGTGACATCTGCCATGAACTTTTGTCAGTTTGTCAATGTTTTGTATTGGTGATCACTTTGTTGGTGCAACTTAATATATAAATAAATAAATAAAATAAAACTTGTGTTCAGACGT…
>Dazao	GGTCCGTACTCTCCCTTAAACAGAATCCTTTGGGACTACTATAATGTCCACGGTAGCGCGGTCTCCGTCAATGTTCGTTCGGAGTTGTCCGATTGCGCTGAACTAATTTTAAGTGAACTTGATGTTTTTTCTAACTGTCTCACAACTTACAGGAAAAATCTGTCGCGGATCATTTCCCAATTAAATATTAATTAATCTTAAGCAATCAATTAAATGTAATCAAATCTTAGTTATATAATCTTTTTATTTTTGTTGTTAATGCACTGTCGATTGCACCTATAATTGAGGTGACATCTGCCATAAACTTTTGTCAGTTTGTCAATGTTTTGTATTGATGATCACTTTGTTGGTGCAACTTAATATATAAATACATAAATAAAATAAAACTTGTGTTCAGAC…
>BomL112	GGTCCGTACTCTCCCTTAAACAGAATCCTTTGGGACTACTATAATGTCCACGGTAGCGCGGTCTCCGTCAATGTTCGTTCGGAGTTGTCCGATTGCGCTGAACTAATTTTAAGTGAACTTGATGTTTTTTCTAACTGTCTCACAACTTACAGGAAAAATCTGTCGCGGATCATTTCCCAATTAAATATTAATTAATCTTAAGCAATCAATTAAATGTAATCAAATCTTAGTTATATAATCTTTTTATTTTTGTTGTTAATGCACTGTCGATTGCACCTATAATTGAGGTGACATCTGCCATAAACTTTTGTCAGTTTGTCAATGTTTTGTATTGATGATCACTTTGTTGGTGCAACTTAATATATAAATACATAAATAAAATAAAACTTGTGTTCAGAC…
>BomL113	GGTCCGTACTCTCCCTTAAACAGAATCCTTTGGGACTACTATAATGTCCACGGTAGCGCGGTCTCCGTCAATGTTCGTTCGGAGTTGTCCGATTGCGCTGAACTAATTTTAAGTGAACTTGATGTTTTTTCTAACTGTCTCACAACTTACAGGAAAAATCTGTCGCGGATCATTTCCCAATTAAATATTAATTAATCTTAAGCAATCAATTAAATGTAATCAAATCTTAGTTATATAATCTTTTTATTTTTGTTGTTAATGCACTGTCGATTGCACCTATAATTGAGGTGACATCTGCCATAAACTTTTGTCAGTTTGTCAATGTTTTGTATTGATGATCACTTTGTTGGTGCAACTTAATATATAAATACATAAATAAAATAAAACTTGTGTTCAGAC…
>BomL122	GGTCCGTACTCTCCCTTAAACAGAATCCTTTGGGACTACTATAATGTCCACGGTAGCGCGGTCTCCGTCAATGTTCGTTCGGAGTTGTCCGATTGCGCTGAACTAATTTTAAGTGAACTTGATGTTTTTTCTAACTGTCTCACAACTTACAGGAAAAATCTGTCGCGGATCATTTCCCAATTAAATATTAATTAATCTTAAGCAATCAATTAAATGTAATCAAATCTTAGTTATATAATCTTTTTATTTTTGTTGTTAATGCACTGTCGATTGCACCTATAATTGAGGTGACATCTGCCATAAACTTTTGTCAGTTTGTCAATGTTTTGTATTGATGATCACTTTGTTGGTGCAACTTAATATATAAATACATAAATAAAATAAAACTTGTGTTCAGAC…
>BomL123	GGTCCGTACTCTCCCTTAAACAGAATCCTTTGGGACTACTATAATGTCCACGGTAGCGCGGTCTCCGTCAATGTTCGTTCGGAGTTGTCCGATTGCGCTGAACTAATTTTAAGTGAACTTGATGTTTTTTCTAACTGTCTCACAACTTACAGGAAAAATCTGTCGCGGATCATTTCCCAATTAAATATTAATTAATCTTAAGCAATCAATTAAATGTAATCAAATCTTAGTTATATAATCTTTTTATTTTTGTTGTTAATGCACTGTCGATTGCACCTATAATTGAGGTGACATCTGCCATAAACTTTTGTCAGTTTGTCAATGTTTTGTATTGATGATCACTTTGTTGGTGCAACTTAATATATAAATACATAAATAAAATAAAACTTGTGTTCAGAC…
>BomL125	GGTCCGTACTCTCCCTTAAACAGAATCCTTTGGGACTACTATAATGTCCACGGTAGCGCGGTCTCCGTCAATGTTCGTTCGGAGTTGTCCGATTGCGCTGAACTAATTTTAAGTGAACTTGATGTTTTTTCTAACTGTCTCACAACTTACAGGAAAAATCTGTCGCGGATCATTTCCCAATTAAATATTAATTAATCTTAAGCAATCAATTAAATGTAATCAAATCTTAGTTATATAATCTTTTTATTTTTGTTGTTAATGCACTGTCGATTGCACCTATAATTGAGGTGACATCTGCCATAAACTTTTGTCAGTTTGTCAATGTTTTGTATTGATGATCACTTTGTTGGTGCAACTTAATATATAAATACATAAATAAAATAAAACTTGTGTTCAGAC…
>BomL138	GGTCCGTACTCTCCCTTAAACAGAATCCTTTGGGACTACTATAATGTCCACGGTAGCGCGGTCTCCGTCAATGTTCGTTCGGAGTTGTCCGATTGCGCTGAACTAATTTTAAGTGAACTTGATGTTTTTTCTAACTGTCTCACAACTTACAGGAAAAATCTGTCGCGGATCATTTCCCAATTAAATATTAATTAATCTTAAGCAATCAATTAAATGTAATCAAATCTTAGTTATATAATCTTTTTATTTTTGTTGTTAATGCACTGTCGATTGCACCTATAATTGAGGTGACATCTGCCATAAACTTTTGTCAGTTTGTCAATGTTTTGTATTGATGATCACTTTGTTGGTGCAACTTAATATATAAATACATAAATAAAATAAAACTTGTGTTCAGAC…
>BomL165	GGTCCGTACTCTCCCTTAAACAGAATCCTTTGGGACTACTATAATGTCCACGGTAGCGCGGTCTCCGTCAATGTTCGTTCGGAGTTGTCCGATTGCGCTGAACTAATTTTAAGTGAACTTGATGTTTTTTCTAACTGTCTCACAACTTACAGGAAAAATCTGTCGCGGATCATTTCCCAATTAAATATTAATTAATCTTAAGCAATCAATTAAATGTAATCAAATCTTAGTTATATAATCTTTTTATTTTTGTTGTTAATGCACTGTCGATTGCACCTATAATTGAGGTGACATCTGCCATAAACTTTTGTCAGTTTGTCAATGTTTTGTATTGATGATCACTTTGTTGGTGCAACTTAATATATAAATACATAAATAAAATAAAACTTGTGTTCAGAC…
>BomL211	GGTCCGTACTCTCCCTTAAACAGAATCCTTTGGGACTACTATAATGTCCACGGTAGCGCGGTCTCCGTCAATGTTCGTTCGGAGTTGTCCGATTGCGCTGAACTAATTTTAAGTGAACTTGATGTTTTTTCTAACTGTCTCACAACTTACAGGAAAAATCTGTCGCGGATCATTTCCCAATTAAATATTAATTAATCTTAAGCAATCAATTAAATGTAATCAAATCTTAGTTATATAATCTTTTTATTTTTGTTGTTAATGCACTGTCGATTGCACCTATAATTGAGGTGACATCTGCCATAAACTTTTGTCAGTTTGTCAATGTTTTGTATTGATGATCACTTTGTTGGTGCAACTTAATATATAAATACATAAATAAAATAAAACTTGTGTTCAGAC…
