# Supplementary material for: The BTB-ZF gene Bm-mamo regulates pigmentation in silkworm caterpillars
Source: eLife. 2024 Apr 8;12:RP90795. doi: 10.7554/eLife.90795 (PMC11001300; doi:10.7554/eLife.90795)
Supplement: Supplementary file 2. [file elife-90795-supp2.xlsx]

## Sheet: Sheet1
Supplementary Table S2. The indel and SNP in the region responsible for bdf
number	Position	Reference sequence	ALT sequence
1	7316807	A	G
2	7320156	CAATAATT	C
3	7320199	T	C
4	7320204	TTCTTAATTGAGGGCAAC	T
5	7320230	T	A
6	7324797	G	A
7	7324801	T	C
8	7324808	G	A
9	7324814	A	C
10	7324817	C	T
11	7324819	C	A
12	7325061	T	C
13	7332513	GGATAGTTTTTTTT	G
14	7332530	T	TC
15	7332555	G	GT
16	7332795	G	T
17	7332808	A	G
18	7332810	C	G
19	7332831	G	A
20	7333293	C	T
21	7333297	A	G
22	7333303	C	A
23	7333500	C	CG
24	7333639	A	G
25	7333677	G	A
26	7333822	G	A
27	7333831	C	T
28	7333851	A	AAGG
29	7334520	T	A
30	7334544	C	T
31	7334546	G	T
32	7334552	A	C
33	7334555	A	T
34	7334569	G	C
35	7334570	A	C
36	7334576	A	G
37	7334597	G	C
38	7334756	A	G
39	7335114	AG	A
40	7336847	C	G
41	7336848	G	A
42	7337265	T	A
43	7353264	C	A
44	7353464	G	A
45	7356217	G	C
46	7361617	C	T
47	7361980	C	A
48	7362171	C	T
49	7370432	T	A
50	7382697	G	GT
51	7396071	A	C
52	7415771	A	G
53	7417110	AAT	A
54	7439577	A	T
55	7439974	T	A
56	7440103	A	T
57	7440348	AT	A
58	7440485	C	T
59	7441732	A	T
60	7441917	T	TA
61	7441926	T	G
62	7442075	A	G
63	7446204	C	CTTAGAGCGATCCCTATGGA
64	7446212	T	TCTCCGTAGACCC
65	7446367	G	A
66	7446425	G	C
67	7446464	A	T
68	7446537	T	TTTTTTTTTTTTTTTTTTTTTATTGCTTTGATGGA
69	7446596	G	C
70	7446950	GAAAAAAAA	G
71	7446959	A	ATTTTTTTTTT
72	7446962	C	T
73	7446991	A	T
74	7447827	G	GAATATATACACCTACCAAGCTTCATCTCTGCACTCCCCTAAGGTAGACTGTTAGAGAATGCCTATGGCATTAAGTCCGCCTTTATACTTTATAGTATAAGAAGTTATAAATAAATAAATAAAAAATAAA
75	7447880	T	G
76	7448447	G	T
77	7448454	T	A
78	7456427	T	C
79	7458064	A	ATG
80	7458724	C	T
81	7458737	C	G
82	7458763	C	A
83	7458829	A	T
84	7458839	T	A
85	7458850	C	G
86	7460891	A	G
87	7461384	G	GTTTAA
88	7461965	T	TAA
89	7462106	T	TGAAGTGAGAAGAGTGGATATTGCACCACTTTCCCGA
90	7462111	T	TAGTAATGCG
91	7462115	T	C
92	7462761	G	GA
93	7464027	TAA	T
94	7464129	T	C
95	7464549	A	T
96	7464694	A	G
97	7464873	G	A
98	7465153	T	C
99	7465197	T	G
100	7465649	ATTACGATT	A
101	7466488	T	G
102	7469552	A	G
103	7471051	G	A
104	7473092	T	A
105	7474382	T	TA
106	7474509	A	AAAAAG
107	7475952	T	A
108	7479011	T	A
109	7479141	TCCATC	T
110	7481220	T	C
111	7481380	T	A
112	7481382	TATA	T
113	7481715	T	A
114	7483572	G	T
115	7484658	T	C
116	7486058	A	C
117	7486171	T	G
118	7486292	C	A
119	7486372	G	T
120	7486383	T	C
121	7486407	A	T
122	7486408	A	T
123	7486518	A	C
124	7486540	G	C
125	7487789	G	A
126	7487794	A	T
127	7487825	C	G
128	7487880	C	CT
129	7487891	T	C
130	7487893	TAA	T
131	7487904	T	C
132	7487909	T	A
133	7487911	G	A
134	7487913	T	C
135	7487968	A	G
136	7487974	T	C
137	7487995	A	G
138	7487996	G	A
139	7487999	T	C
140	7488015	A	T
141	7488025	C	T
142	7488035	G	A
143	7488058	G	A
144	7488077	TAA	T
145	7488082	A	ACC
146	7488088	A	T
147	7488478	T	TC
148	7489305	G	C
149	7490124	A	AC
150	7491068	A	C
151	7491681	T	TAA
152	7491684	ACT	A
153	7498645	T	TA
154	7498775	T	TA
155	7508717	T	C
156	7508719	C	G
157	7508735	A	G
158	7508871	T	TCGTC
159	7509233	G	A
160	7509234	A	AC
161	7509361	G	A
162	7509385	T	C
163	7509386	T	C
164	7509399	G	A
165	7509408	A	G
166	7509418	A	C
167	7509448	TGA	T
168	7509461	TGCACGG	T
169	7509470	A	T
170	7509482	G	C
171	7509503	T	C
172	7509512	A	T
173	7509584	A	G
174	7509711	A	AT
175	7509743	T	A
176	7509767	G	C
177	7511669	GTT	G
178	7512904	G	C
179	7513238	T	G
180	7513253	A	G
181	7513277	T	C
182	7513312	G	T
183	7513327	C	G
184	7514492	A	C
185	7514783	C	A
186	7517289	G	T
187	7517316	G	*,A
188	7517318	G	*,A
189	7517320	G	A
190	7517374	T	A
191	7518059	G	C
192	7518388	T	TCG
193	7518970	G	C
194	7519653	AT	A
195	7521134	T	G
196	7523470	G	GA
197	7525558	T	C
198	7526835	C	T
199	7527254	C	A
200	7527362	C	A
201	7527386	A	T
202	7527429	A	T
203	7527489	GA	G
204	7527619	T	C
205	7527625	GC	G
206	7527627	T	A
207	7527635	A	T
208	7527649	A	T
209	7527675	G	C
210	7527682	C	T
211	7527697	C	G
212	7527709	T	A
213	7527713	G	A
214	7527720	G	C
215	7527737	T	C
216	7527769	C	T
217	7527794	C	T
218	7527806	A	G
219	7527828	A	T
220	7527872	C	T
221	7527879	T	G
222	7527925	T	C
223	7527976	A	C
224	7527982	T	A
225	7527989	C	T
226	7528045	T	C
227	7528054	CAG	C
228	7528089	T	C
229	7528137	G	A
230	7528351	A	G
231	7528354	CG	C
232	7528356	T	C
233	7528361	G	A
234	7528379	G	A
235	7528386	T	A
236	7528391	T	A
237	7528393	A	T
238	7528395	A	C
239	7528837	A	G
240	7529117	C	T
241	7529238	C	A
242	7529301	C	T
243	7529303	C	T
244	7529305	C	T
245	7529329	C	T
246	7529362	G	C
247	7529426	C	A
248	7529524	GGCCCCCTTTGCCGGTTCCCAA	G
249	7529601	CG	C
250	7529609	TG	T
251	7529700	T	C
252	7529714	T	C
253	7529715	A	G
254	7529732	G	C
255	7529831	C	T
256	7529901	G	A
257	7529938	G	A
258	7530529	C	T
259	7530679	C	CTGTGTG
260	7530906	A	AT
261	7531022	C	T
262	7531195	G	C
263	7531469	C	T
264	7531515	A	G
265	7531540	A	G
266	7532630	AT	A
267	7533035	G	A
268	7533101	T	A
269	7533249	A	AT
270	7535118	G	GA
271	7535150	G	T
272	7535674	T	A
273	7536199	A	C
274	7536497	G	A
275	7536518	C	A
276	7536558	G	T
277	7536993	T	A
278	7537411	C	CG
279	7537677	T	C
280	7538389	A	T
281	7540238	T	C
282	7540739	ATTTTT	A
283	7542588	TACATGA	T
284	7545321	T	TTC
285	7546576	A	ATGT
286	7547703	T	A
287	7547933	A	G
288	7547936	GA	G
289	7548447	T	G
290	7548448	G	A
291	7548461	C	G
292	7548464	C	T
293	7548465	C	T
294	7548491	A	G
295	7548498	G	A
296	7548519	C	T
297	7548524	A	G
298	7548724	A	G
299	7548748	A	C
300	7548800	G	A
301	7548838	G	T
302	7548843	G	A
303	7548850	C	T
304	7548912	A	G
305	7549670	T	C
306	7549826	C	CATACATCGTATGCCATATTCGTTACTCAAGACGGTTA
307	7550504	A	ATT
308	7550950	A	AT
309	7551972	A	AT
310	7553642	T	A
311	7554703	CT	C
312	7555964	C	A
313	7555999	A	ATTTT
314	7557362	A	G
315	7557393	G	A
316	7557406	T	TGAG
317	7557435	A	G
318	7557480	C	T
319	7557486	A	T
320	7564403	AGACCAT	A
321	7564413	CAGATTTTGCGACCTGATCA	C
322	7564483	G	A
323	7564505	G	A
324	7564513	C	G
325	7564519	CACGA	C
326	7564524	T	TCCC
327	7564526	C	T
328	7564588	G	A
329	7564625	T	TG
330	7564628	CCG	C
331	7564633	C	G
332	7564634	ACG	A
333	7564674	G	A
334	7569062	T	C
335	7569185	G	A
336	7569233	G	A
337	7569252	T	G
338	7569813	G	T
339	7569869	T	C
340	7569963	T	TTGCAAGTATCATCATCATCATCATCATCATCAACAGCCCACAGTCGTCCACTGCTGGACATAGGCCTCTCCCAATCCACACCACAATAAGTGTAATATAATATAA
341	7570882	GATATGCT	G
342	7570997	A	ACTATTC
343	7571002	A	T
344	7571007	A	ATT
345	7571192	A	AT
346	7571212	T	TCA
347	7571424	A	G
348	7571519	A	T
349	7571521	C	T
350	7571524	T	TTTTTTTTAAGATTGAAGGATTACTGGTGG
351	7571566	G	A
352	7571593	C	T
353	7571646	C	A
354	7571656	A	T
355	7571679	G	A
356	7571786	T	C
357	7574636	T	C
358	7574772	C	T
359	7575846	A	AC
360	7575848	A	C
361	7579171	AAATAATTAGTTTAATTAAAAATTTTAGATCGCAGAATACTAAACAGTTATGT	A
362	7585542	A	T
363	7586186	G	A
364	7588585	T	TC
365	7588586	A	C
366	7588589	T	A
367	7588590	A	ACTCTGAACC
368	7588593	A	G
369	7588597	A	T
370	7589395	T	A
371	7589396	T	A
372	7590492	G	A
373	7590507	G	C
374	7590529	G	C
375	7590531	C	T
376	7590535	C	A
377	7590702	A	G
378	7590713	G	GATTTTA
379	7590718	G	C
380	7590725	A	C
381	7590759	A	G
382	7591612	G	T
383	7591661	T	C
384	7591731	A	T
385	7592491	A	G
386	7592567	A	T
387	7630004	A	AG
388	7643232	A	T
389	7643238	T	TTTTA
390	7643289	T	G
391	7644620	A	AG
392	7645583	G	A
393	7646672	G	T
394	7646843	C	CATAAA
395	7646863	G	GT
396	7647457	T	G
397	7647973	C	T
398	7648842	G	A
399	7648851	G	C
400	7648854	A	C
401	7648866	A	C
402	7648918	C	T
403	7648951	C	T
404	7648974	G	A
405	7648977	A	T
406	7648992	TC	T
407	7649163	A	G
408	7649304	A	G
409	7649305	G	A
410	7649310	T	A
411	7649329	C	T
412	7649330	A	G
413	7649332	T	C
414	7649337	G	A
415	7649338	C	A
416	7649357	G	A
417	7649397	T	A
418	7649441	A	T
419	7649442	C	A
420	7650312	A	AT
421	7650330	C	T
422	7651156	AT	A
423	7651581	T	A
424	7652532	C	T
425	7652973	GT	G
426	7655115	TA	T
427	7656544	G	A
428	7656656	T	C
429	7656696	C	T
430	7656699	G	A
431	7656701	G	A
432	7656705	C	T
433	7656831	C	T
434	7657063	A	T
435	7657162	A	C
436	7657332	C	T
437	7657387	C	A
438	7657413	A	T
439	7665074	A	G
440	7665086	T	G
441	7665097	C	G
442	7665109	G	T
443	7665165	G	A
444	7665172	G	C
445	7665188	G	T
446	7672196	A	T
447	7673986	G	A
448	7674015	T	G
449	7674053	T	G
450	7675625	C	T
451	7675680	T	C
452	7676125	A	C
453	7676821	G	A
454	7676973	T	TA
455	7677441	T	A
456	7679225	TA	T
457	7679784	T	C
458	7681014	A	AACGT
459	7681058	G	A
460	7681606	T	C
461	7681610	G	A
462	7681612	G	A
463	7681624	C	T
464	7681625	T	G
465	7681629	A	G
466	7681642	G	A
467	7681658	C	T
468	7681665	T	C
469	7681778	G	A
470	7681780	A	T
471	7681781	T	C
472	7681785	C	CGT
473	7681788	T	C
474	7681789	T	TAACTCCGCAC
475	7681792	G	A
476	7681794	T	C
477	7681797	T	C
478	7681804	G	C
479	7681811	T	TCG
480	7681817	C	G
481	7681854	A	G
482	7682567	G	A
483	7683565	G	T
484	7684449	A	ACT
485	7684935	T	A
486	7684936	G	A
487	7684944	T	C
488	7684945	G	A
489	7684968	A	T
490	7686030	C	CA
491	7689020	A	G
492	7690131	A	G
493	7690724	T	TGAAC
494	7691590	T	TA
