# Supplementary material for: The BTB-ZF gene Bm-mamo regulates pigmentation in silkworm caterpillars
Source: eLife. 2024 Apr 8;12:RP90795. doi: 10.7554/eLife.90795 (PMC11001300; doi:10.7554/eLife.90795)
Supplement: Supplementary file 3. — The position weight matrix of the mamo-L protein was used to search for 2000 base pair regions upstream and downstream of the predicted silkworm gene. [file elife-90795-supp3.xlsx]

## Sheet: Sheet1
Supplementary Table S3. The binding site analysis of Bm-mamo-L
Number	motif id	gene ID	up/down stream	start	stop	strand	score	p-value	q-value	matched sequence
1	mamo-L	BGIBMGA000004	down	131	145	-	10.8226	7.58e-05	1	AAGGCGGGCGATTTT
2	mamo-L	BGIBMGA000005	up	1470	1484	-	10.5726	9.33e-05	1	TAGGCTAATATTTAT
3	mamo-L	BGIBMGA000006	up	1289	1303	+	11.4435	4.31e-05	1	GAGGCCCGGTTTTTT
4	mamo-L	BGIBMGA000011	down	1676	1690	-	10.8629	7.33e-05	1	TAGGCTCTGATTAGC
5	mamo-L	BGIBMGA000012	down	515	529	-	12.5323	1.39e-05	1	TAGGCCTTTTATGAT
6	mamo-L	BGIBMGA000013	up	950	964	-	11.2177	5.34e-05	1	TAGGCTCAGTCTTTT
7	mamo-L	BGIBMGA000014	up	625	639	+	13.2258	6.08e-06	1	TAGGCTTACAATGCT
8	mamo-L	BGIBMGA000014	up	733	747	-	11.5323	3.96e-05	1	TAGGCGAACATTTGT
9	mamo-L	BGIBMGA000014	up	1311	1325	-	10.5726	9.33e-05	1	TAGGCTAATATTTAT
10	mamo-L	BGIBMGA000015	up	1355	1369	+	10.5726	9.33e-05	1	TAGGCTAATATTTAT
11	mamo-L	BGIBMGA000016	up	1911	1925	-	13.1532	6.65e-06	1	AAGGCTGTTGTTGCT
12	mamo-L	BGIBMGA000017	up	611	625	-	11.4194	4.42e-05	1	TAGGCTGAATTCATT
13	mamo-L	BGIBMGA000021	down	938	952	+	12.1935	2.05e-05	1	TAGGCGGGCTTTGAA
14	mamo-L	BGIBMGA000022	up	209	223	+	12.1935	2.05e-05	1	TAGGCGGGCTTTGAA
15	mamo-L	BGIBMGA000026	down	1663	1677	-	10.6613	8.67e-05	1	TAGGCTTAGAATAGC
16	mamo-L	BGIBMGA000027	down	63	77	+	13.8871	2.34e-06	1	TAGGCCGTTTTTTTT
17	mamo-L	BGIBMGA000030	down	1167	1181	+	11.0081	6.45e-05	1	TAGGCTCTCAATTCT
18	mamo-L	BGIBMGA000031	down	1825	1839	-	11.0081	6.45e-05	1	TAGGCTCTCAATTCT
19	mamo-L	BGIBMGA000033	down	1329	1343	-	12.7097	1.13e-05	1	TAGGCTGCTGATGTT
20	mamo-L	BGIBMGA000035	up	412	426	+	11.9274	2.69e-05	1	TAGGCTAGGTTTCTT
21	mamo-L	BGIBMGA000036	down	1030	1044	-	11.75	3.21e-05	1	TAGGCTCGAATTGGC
22	mamo-L	BGIBMGA000038	down	1280	1294	-	10.75	8.06e-05	1	GAGGCCGATTGTGCC
23	mamo-L	BGIBMGA000042	down	1316	1330	-	11.7742	3.14e-05	1	TAGGCTGATTTGTTC
24	mamo-L	BGIBMGA000046	down	178	192	-	11.4113	4.45e-05	1	TAGGCTTTTTTCCCT
25	mamo-L	BGIBMGA000047	up	814	828	-	10.9839	6.59e-05	1	TAGGCTTTTTTTAGA
26	mamo-L	BGIBMGA000047	up	1530	1544	-	10.6452	8.79e-05	1	TAGCCTCTGGTTGTT
27	mamo-L	BGIBMGA000048	up	129	143	-	10.7419	8.11e-05	1	TAGGGCGTTGTTGGT
28	mamo-L	BGIBMGA000049	up	1518	1532	+	12.25	1.92e-05	1	TAGGCTCAGGTTAAT
29	mamo-L	BGIBMGA000050	up	697	711	-	11.0806	6.05e-05	1	TAGGCTTATGTGGTG
30	mamo-L	BGIBMGA000051	up	1744	1758	-	11.4516	4.28e-05	1	AAGGCTCACTATGTT
31	mamo-L	BGIBMGA000052	up	1147	1161	+	10.5806	9.27e-05	1	TAGGGCGACGTTGGC
32	mamo-L	BGIBMGA000054	up	869	883	+	10.8065	7.69e-05	1	TAGGCCACCGTGGTT
33	mamo-L	BGIBMGA000055	down	1800	1814	-	11.4435	4.31e-05	1	GAGGCCCGGTTTTTT
34	mamo-L	BGIBMGA000055	down	671	685	-	11.4032	4.49e-05	1	GAGGCTGAAGTCGTT
35	mamo-L	BGIBMGA000060	up	911	925	-	11.0161	6.4e-05	1	TCGGCGGGGTTTGTT
36	mamo-L	BGIBMGA000062	down	988	1002	-	11.9274	2.69e-05	1	TAGGCTCCGTGTGCT
37	mamo-L	BGIBMGA000063	up	655	669	-	13.3468	5.19e-06	1	TAGGCCCGTTTTTGT
38	mamo-L	BGIBMGA000065	up	1299	1313	+	10.9194	6.98e-05	1	TAGGCTACTTTTTTT
39	mamo-L	BGIBMGA000065	up	9	23	+	10.5726	9.33e-05	1	TAGGCTAATATTTAT
40	mamo-L	BGIBMGA000066	up	308	322	+	14.5161	8.88e-07	1	TAGGCCGATATTGGT
41	mamo-L	BGIBMGA000067	up	1602	1616	+	10.5726	9.33e-05	1	TAGGCTAATATTTAT
42	mamo-L	BGIBMGA000070	up	190	204	+	11.8871	2.81e-05	1	TAGGCCGGTATTGCA
43	mamo-L	BGIBMGA000073	down	1869	1883	+	12.0645	2.34e-05	1	TAGGCGGGCTTCGGA
44	mamo-L	BGIBMGA000074	down	1458	1472	-	12.4677	1.49e-05	1	TAGGCTTCTATTGCT
45	mamo-L	BGIBMGA000076	up	845	859	-	10.5726	9.33e-05	1	TAGGCTAATATTTAT
46	mamo-L	BGIBMGA000077	down	1615	1629	+	10.9194	6.98e-05	1	TAGGCTACTTTTTTT
47	mamo-L	BGIBMGA000077	up	693	707	-	10.5726	9.33e-05	1	TAGGCTAATATTTAT
48	mamo-L	BGIBMGA000079	down	1214	1228	-	11.1855	5.5e-05	1	TAGGCTGGGTGTTGG
49	mamo-L	BGIBMGA000080	down	946	960	-	11.1129	5.88e-05	1	TAGGCTGCGGGTTTC
50	mamo-L	BGIBMGA000080	up	640	654	-	11	6.5e-05	1	TAGGCATGCGTGTGT
51	mamo-L	BGIBMGA000083	up	1110	1124	-	10.9435	6.83e-05	1	TAGGCTTAGTGGTGC
52	mamo-L	BGIBMGA000086	up	1558	1572	+	11.621	3.63e-05	1	TAGGCAGGCGTTTCC
53	mamo-L	BGIBMGA000086	up	1283	1297	+	10.879	7.22e-05	1	TAGGCCAATAGTGCT
54	mamo-L	BGIBMGA000088	down	921	935	+	12.8306	9.76e-06	1	AAGGCTGTGTTTTGT
55	mamo-L	BGIBMGA000090	down	1635	1649	-	11.7903	3.08e-05	1	TAGGCCTGGTTTTTG
56	mamo-L	BGIBMGA000091	down	456	470	-	12.4113	1.6e-05	1	AAGGCCGATTTTTGT
57	mamo-L	BGIBMGA000091	down	392	406	-	10.621	8.97e-05	1	TAGGCCTCATTTATT
58	mamo-L	BGIBMGA000093	up	1465	1479	+	11.2016	5.41e-05	1	TAGGCTGACTTTCCG
59	mamo-L	BGIBMGA000093	down	820	834	-	10.5726	9.33e-05	1	TAGGCTAATATTTAT
60	mamo-L	BGIBMGA000096	up	900	914	+	11.7581	3.18e-05	1	TAGGCCGTAAATGTT
61	mamo-L	BGIBMGA000097	up	1643	1657	+	12.4919	1.46e-05	1	TAGGCCGTCTTTTGA
62	mamo-L	BGIBMGA000100	up	1486	1500	-	11.7984	3.06e-05	1	TAGGCTTTGCTTTTT
63	mamo-L	BGIBMGA000103	up	373	387	-	14.2016	1.47e-06	1	TAGGCCGTTTTTTGT
64	mamo-L	BGIBMGA000105	up	1862	1876	-	10.8468	7.42e-05	1	TAGGCCAGCGTCCGT
65	mamo-L	BGIBMGA000105	up	744	758	-	10.5726	9.33e-05	1	TAGGCTAATATTTAT
66	mamo-L	BGIBMGA000108	down	1639	1653	+	11.6048	3.7e-05	1	TAGGCCTGCAGCGCT
67	mamo-L	BGIBMGA000108	down	803	817	-	11.4597	4.25e-05	1	TAGGCGGGGTGGTGT
68	mamo-L	BGIBMGA000112	up	384	398	-	13.1129	6.98e-06	1	TAGGCTCTTGGTGGT
69	mamo-L	BGIBMGA000115	up	349	363	+	12.0645	2.34e-05	1	TAGGCGGGCTTCGGA
70	mamo-L	BGIBMGA000121	up	534	548	+	10.9194	6.98e-05	1	TAGGCTACTTTTTTT
71	mamo-L	BGIBMGA000122	down	600	614	+	10.8468	7.42e-05	1	TAGGCCAGCGTCCGT
72	mamo-L	BGIBMGA000122	down	1718	1732	+	10.5726	9.33e-05	1	TAGGCTAATATTTAT
73	mamo-L	BGIBMGA000124	up	1935	1949	+	14.2016	1.47e-06	1	TAGGCCGTTTTTTGT
74	mamo-L	BGIBMGA000125	up	862	876	+	10.8306	7.52e-05	1	GAGGCTCTTTTTTTT
75	mamo-L	BGIBMGA000126	down	1545	1559	-	11.371	4.62e-05	1	TAGGCTGTATAGGCT
76	mamo-L	BGIBMGA000131	up	1674	1688	+	12.2661	1.89e-05	1	TAGGCTGTGTGCTGT
77	mamo-L	BGIBMGA000131	up	1506	1520	+	11.4435	4.31e-05	1	TAGGCTTGAGAGGCT
78	mamo-L	BGIBMGA000136	down	641	655	-	12.2742	1.87e-05	1	TAGGCTTTTTTTGTG
79	mamo-L	BGIBMGA000136	up	1874	1888	-	10.5645	9.4e-05	1	TAGGCTTACTAGCTT
80	mamo-L	BGIBMGA000138	up	624	638	+	10.5726	9.33e-05	1	TAGGCTAATATTTAT
81	mamo-L	BGIBMGA000139	down	146	160	+	13.1935	6.33e-06	1	TAGGCCGGTTTTACT
82	mamo-L	BGIBMGA000139	down	1489	1503	+	12.5242	1.4e-05	1	TAGGCAGATTTTGGC
83	mamo-L	BGIBMGA000142	up	327	341	-	12.7984	1.02e-05	1	TAGGCCTTTTTTGGA
84	mamo-L	BGIBMGA000143	up	1665	1679	+	10.5806	9.27e-05	1	GAGGCGCGCTGTGTT
85	mamo-L	BGIBMGA000153	up	1679	1693	+	13.0403	7.65e-06	1	TAGGCCTTGATTTTT
86	mamo-L	BGIBMGA000153	up	1043	1057	+	10.5887	9.21e-05	1	AAGGCCGGTGTGGCC
87	mamo-L	BGIBMGA000153	down	1516	1530	-	10.5726	9.33e-05	1	TAGGCTAATATTTAT
88	mamo-L	BGIBMGA000156	up	365	379	-	10.4919	9.96e-05	1	TAGGCTGTGTCTGTG
89	mamo-L	BGIBMGA000161	down	928	942	-	13.2903	5.6e-06	1	TAGGCTCTCGGTGTT
90	mamo-L	BGIBMGA000161	down	1262	1276	-	11.3952	4.52e-05	1	TAGGCTCATTAGGCT
91	mamo-L	BGIBMGA000161	down	1253	1267	-	11.2339	5.26e-05	1	TAGGCTCATTTTCCC
92	mamo-L	BGIBMGA000161	up	1146	1160	-	10.9194	6.98e-05	1	TAGGCTACTTTTTTT
93	mamo-L	BGIBMGA000162	up	89	103	+	10.9597	6.73e-05	1	TAGGCTGATAACGAT
94	mamo-L	BGIBMGA000164	up	1438	1452	-	10.5	9.9e-05	1	AAGGCTGGGTATACT
95	mamo-L	BGIBMGA000166	up	1813	1827	+	12.6855	1.16e-05	1	TAGGCCTTTTTTATT
96	mamo-L	BGIBMGA000166	down	1847	1861	-	10.9194	6.98e-05	1	TAGGCTACTTTTTTT
97	mamo-L	BGIBMGA000167	down	550	564	-	11.2984	4.95e-05	1	TAGGCTTACTTTCCA
98	mamo-L	BGIBMGA000168	up	492	506	+	11.0887	6.01e-05	1	TAGCCTGAGGTTGTC
99	mamo-L	BGIBMGA000174	down	200	214	-	11.9677	2.59e-05	1	TAGGCTTTATATTGT
100	mamo-L	BGIBMGA000174	down	1643	1657	-	10.5726	9.33e-05	1	TAGGCTAATATTTAT
101	mamo-L	BGIBMGA000176	down	1874	1888	+	11.871	2.85e-05	1	TAGGCTTTATTTGTA
102	mamo-L	BGIBMGA000177	up	222	236	+	10.7984	7.74e-05	1	TAGGCTCATGTTTCG
103	mamo-L	BGIBMGA000177	up	908	922	+	10.5403	9.58e-05	1	TAGGCTGTATGGTGT
104	mamo-L	BGIBMGA000178	down	817	831	-	11.1048	5.92e-05	1	TAGGCCAGTTTTGCA
105	mamo-L	BGIBMGA000178	up	857	871	-	10.5968	9.15e-05	1	GAGGCTATGTTTTTT
106	mamo-L	BGIBMGA000182	down	862	876	+	14.6532	6.86e-07	1	TAGGCTTAGTTTTTT
107	mamo-L	BGIBMGA000188	up	1186	1200	+	10.5887	9.21e-05	1	TAGGCGGAGTGTTGG
108	mamo-L	BGIBMGA000190	down	1836	1850	+	12.1129	2.22e-05	1	AAGGCCTATTTTTGT
109	mamo-L	BGIBMGA000191	up	528	542	+	12.1129	2.22e-05	1	AAGGCCTATTTTTGT
110	mamo-L	BGIBMGA000192	up	981	995	-	10.9113	7.02e-05	1	TAGGCTCGTTTGTGC
111	mamo-L	BGIBMGA000196	down	1092	1106	+	10.9355	6.88e-05	1	TAGGCTTCCGGTGGA
112	mamo-L	BGIBMGA000197	up	1927	1941	-	12.1129	2.22e-05	1	AAGGCCTATTTTTGT
113	mamo-L	BGIBMGA000198	up	1962	1976	-	11.2581	5.14e-05	1	TAGGCTATTGTTCTT
114	mamo-L	BGIBMGA000198	down	1123	1137	-	11.0806	6.05e-05	1	AAGGCTGTGCTTGTT
115	mamo-L	BGIBMGA000201	down	743	757	+	14.9677	3.56e-07	1	TAGGCTTAGTTTTGT
116	mamo-L	BGIBMGA000201	up	560	574	-	10.5887	9.21e-05	1	TAGGCGGAGTGTTGG
117	mamo-L	BGIBMGA000206	down	109	123	+	10.5726	9.33e-05	1	TAGGCTAATATTTAT
118	mamo-L	BGIBMGA000207	down	1936	1950	+	12.3145	1.79e-05	1	TAGGCGGGTTATTTT
119	mamo-L	BGIBMGA000207	up	224	238	+	10.5726	9.33e-05	1	TAGGCTAATATTTAT
120	mamo-L	BGIBMGA000209	up	1052	1066	+	12.3145	1.79e-05	1	TAGGCGGGTTATTTT
121	mamo-L	BGIBMGA000210	down	1117	1131	-	12.8548	9.51e-06	1	TAGGCGGGGATGGGT
122	mamo-L	BGIBMGA000211	up	963	977	+	14.7258	5.83e-07	1	TAGGCTTGCGTTGCC
123	mamo-L	BGIBMGA000216	up	1266	1280	+	10.5161	9.77e-05	1	TAGCCTGTGTTTTTT
124	mamo-L	BGIBMGA000219	up	878	892	-	11.5323	3.96e-05	1	TAGGCGTGAGGTGAT
125	mamo-L	BGIBMGA000219	down	1190	1204	+	11.0645	6.14e-05	1	GAGGCTGGTGATGCC
126	mamo-L	BGIBMGA000219	up	179	193	-	11.0403	6.28e-05	1	TAGGCTGTATGTTAT
127	mamo-L	BGIBMGA000222	down	511	525	+	10.5726	9.33e-05	1	TAGGCTAATATTTAT
128	mamo-L	BGIBMGA000223	up	1579	1593	-	11.2823	5.03e-05	1	AAGGCGGTTTTTTTT
129	mamo-L	BGIBMGA000225	down	1209	1223	-	10.6129	9.03e-05	1	TAGGCCTGAAGTGCC
130	mamo-L	BGIBMGA000228	down	1292	1306	-	11.129	5.79e-05	1	GAGGCTGTGTATTCT
131	mamo-L	BGIBMGA000229	down	88	102	+	10.4919	9.96e-05	1	TAGGCCTGTAGTTAT
132	mamo-L	BGIBMGA000238	up	1170	1184	+	10.5645	9.4e-05	1	TAGGCTTATTACACT
133	mamo-L	BGIBMGA000239	up	791	805	+	11.8306	2.97e-05	1	TAGGCTGTTGCTGAT
134	mamo-L	BGIBMGA000239	up	785	799	+	10.9113	7.02e-05	1	GAGGCCTAGGCTGTT
135	mamo-L	BGIBMGA000240	down	1572	1586	+	11.2661	5.1e-05	1	GAGGCTTGCAGTGGT
136	mamo-L	BGIBMGA000240	down	1601	1615	+	11.1774	5.54e-05	1	TAGGCTTAGGACTCC
137	mamo-L	BGIBMGA000242	up	62	76	-	10.9919	6.55e-05	1	TAGGCTTAAAATGTC
138	mamo-L	BGIBMGA000244	down	642	656	+	10.6935	8.45e-05	1	AAGGCCTTCTTCTTT
139	mamo-L	BGIBMGA000247	up	1473	1487	+	11.2097	5.38e-05	1	TAGGCCGTTTGCTTT
140	mamo-L	BGIBMGA000250	up	955	969	+	13.1048	7.05e-06	1	TAGGCCTTCGTTGTA
141	mamo-L	BGIBMGA000250	down	1487	1501	+	11.5242	3.99e-05	1	TAGGCAGACGTTGGG
142	mamo-L	BGIBMGA000251	up	1125	1139	+	11.5726	3.81e-05	1	TAGGCTGTTGTTTCG
143	mamo-L	BGIBMGA000251	up	135	149	+	11.5242	3.99e-05	1	TAGGCAGACGTTGGG
144	mamo-L	BGIBMGA000253	down	136	150	+	10.5726	9.33e-05	1	AAGGCTGACTTTTTA
145	mamo-L	BGIBMGA000257	up	1058	1072	+	11.7903	3.08e-05	1	TAGGCCTCATTTGAT
146	mamo-L	BGIBMGA000260	up	493	507	-	10.5726	9.33e-05	1	TAGGCTAATATTTAT
147	mamo-L	BGIBMGA000261	down	1668	1682	-	11.5	4.08e-05	1	TAGGCAGATTTTAGT
148	mamo-L	BGIBMGA000262	up	1457	1471	-	11.5	4.08e-05	1	TAGGCAGATTTTAGT
149	mamo-L	BGIBMGA000274	down	1698	1712	-	10.5	9.9e-05	1	AAGGCTTTGTTTCGC
150	mamo-L	BGIBMGA000275	up	1578	1592	+	11.5484	3.9e-05	1	TAGGCTGTGGTCGAA
151	mamo-L	BGIBMGA000280	down	412	426	+	11.371	4.62e-05	1	GAGGCTTAGATTTCT
152	mamo-L	BGIBMGA000284	up	1963	1977	-	12.6129	1.26e-05	1	TAGGCTGATGATAGT
153	mamo-L	BGIBMGA000285	down	12	26	-	11.1129	5.88e-05	1	AAGGCCTGCAGTGGT
154	mamo-L	BGIBMGA000287	down	1565	1579	+	11.5323	3.96e-05	1	TAGGCGTGAGGTGAT
155	mamo-L	BGIBMGA000287	down	175	189	-	10.9435	6.83e-05	1	TAGGCCGGTTACAGT
156	mamo-L	BGIBMGA000288	up	1229	1243	+	11.5323	3.96e-05	1	TAGGCGTGAGGTGAT
157	mamo-L	BGIBMGA000290	down	621	635	+	11.4597	4.25e-05	1	TAGGCGGGGTGGTGT
158	mamo-L	BGIBMGA000291	down	125	139	-	13.7823	2.76e-06	1	TAGGCTTTTTGTGGT
159	mamo-L	BGIBMGA000293	down	1921	1935	-	10.5726	9.33e-05	1	TAGGCTAATATTTAT
160	mamo-L	BGIBMGA000294	down	1905	1919	-	10.7419	8.11e-05	1	TCGGCGGTGTTTGCT
161	mamo-L	BGIBMGA000294	up	514	528	+	10.5887	9.21e-05	1	TAGGCTCTGTTTCGA
162	mamo-L	BGIBMGA000297	up	600	614	+	13.2177	6.14e-06	1	TAGGCCTACTACGGT
163	mamo-L	BGIBMGA000301	down	1066	1080	+	12.1613	2.11e-05	1	TAGGCCCTCCTTGGT
164	mamo-L	BGIBMGA000301	down	900	914	+	10.6371	8.85e-05	1	TAGGCAGGCGGTAGT
165	mamo-L	BGIBMGA000304	down	1276	1290	-	12.0403	2.4e-05	1	TAGGCGTAGATTTAT
166	mamo-L	BGIBMGA000305	down	1554	1568	-	10.629	8.91e-05	1	TAGGCGGTCTACTGC
167	mamo-L	BGIBMGA000311	down	1724	1738	+	10.7661	7.95e-05	1	TAGGCCCTAGATTCT
168	mamo-L	BGIBMGA000312	down	1951	1965	-	10.8065	7.69e-05	1	AAGGCCTTAGTTTTT
169	mamo-L	BGIBMGA000324	up	1155	1169	+	11.1935	5.45e-05	1	TAGGCCACGGATGTT
170	mamo-L	BGIBMGA000326	down	1463	1477	+	12.4032	1.61e-05	1	TAGGCATGGGGTGGT
171	mamo-L	BGIBMGA000327	up	336	350	-	11.1613	5.63e-05	1	TAGGCTCTCTGTATT
172	mamo-L	BGIBMGA000329	up	134	148	+	11.7581	3.18e-05	1	TAGGCCGTATTGTGT
173	mamo-L	BGIBMGA000329	down	1093	1107	-	10.8629	7.33e-05	1	TAGGCCCCCTTCGTC
174	mamo-L	BGIBMGA000330	down	1103	1117	-	13.1129	6.98e-06	1	TAGGCGTATTGTGTT
175	mamo-L	BGIBMGA000330	down	1407	1421	+	12.4355	1.55e-05	1	GAGGCTTACATTGTT
176	mamo-L	BGIBMGA000332	up	1327	1341	-	11.9839	2.54e-05	1	GAGGCCTGATTTGTT
177	mamo-L	BGIBMGA000332	up	699	713	-	10.6371	8.85e-05	1	TAGGCATTTGTCTGT
178	mamo-L	BGIBMGA000334	up	1925	1939	-	10.7097	8.33e-05	1	TAGGCGCCGGATTGT
179	mamo-L	BGIBMGA000335	down	884	898	-	12.8065	1.01e-05	1	TAGGCTGCTTTTTTT
180	mamo-L	BGIBMGA000335	up	1621	1635	+	10.5161	9.77e-05	1	TAGGCCAACGATGTA
181	mamo-L	BGIBMGA000337	down	1645	1659	+	12.3226	1.77e-05	1	TAGGCCTCTTTTTTT
182	mamo-L	BGIBMGA000337	down	1181	1195	-	11.1613	5.63e-05	1	TAGGCTCCGATTTTT
183	mamo-L	BGIBMGA000340	up	309	323	-	11.5645	3.84e-05	1	TAGGCTGGGGGTCTC
184	mamo-L	BGIBMGA000341	down	427	441	-	10.6048	9.09e-05	1	TAGGCCGTCACTTCT
185	mamo-L	BGIBMGA000345	down	1685	1699	-	12.3629	1.69e-05	1	TAGGCGAGATTTGGT
186	mamo-L	BGIBMGA000345	down	320	334	-	10.5726	9.33e-05	1	TAGGCTAATATTTAT
187	mamo-L	BGIBMGA000346	up	355	369	+	14.3226	1.22e-06	1	TAGGCTTTGATTGTT
188	mamo-L	BGIBMGA000348	up	173	187	+	11.6048	3.7e-05	1	TAGGCTCATATTAGT
189	mamo-L	BGIBMGA000354	down	1914	1928	-	11.1935	5.45e-05	1	TAGGCTTAAGTGAGT
190	mamo-L	BGIBMGA000355	up	889	903	-	11.1935	5.45e-05	1	TAGGCTTAAGTGAGT
191	mamo-L	BGIBMGA000355	down	1492	1506	-	10.5726	9.33e-05	1	TAGGCTTCTATTTAT
192	mamo-L	BGIBMGA000356	up	653	667	-	11.4516	4.28e-05	1	TAGGCGTTGGTTGAG
193	mamo-L	BGIBMGA000358	up	548	562	+	12.8145	9.96e-06	1	GAGGCTGATGTTGGC
194	mamo-L	BGIBMGA000364	up	1774	1788	-	12.3065	1.8e-05	1	TAGGCGTTTATTTGT
195	mamo-L	BGIBMGA000364	down	404	418	+	10.5726	9.33e-05	1	TAGGCTTCTATTTAT
196	mamo-L	BGIBMGA000366	up	400	414	-	13.4677	4.39e-06	1	TAGGCTGATGATGAT
197	mamo-L	BGIBMGA000369	down	1180	1194	+	12.3629	1.69e-05	1	TAGGCGAGATTTGGT
198	mamo-L	BGIBMGA000370	down	679	693	-	10.9194	6.98e-05	1	TAGGCTACTTTTTTT
199	mamo-L	BGIBMGA000370	up	1079	1093	-	10.75	8.06e-05	1	TAGGCTTATGTCTTA
200	mamo-L	BGIBMGA000370	up	1667	1681	-	10.5726	9.33e-05	1	TAGGCTAATATTTAT
201	mamo-L	BGIBMGA000371	up	100	114	-	10.5161	9.77e-05	1	TAGGCCAACGATGTA
202	mamo-L	BGIBMGA000378	down	1099	1113	+	13.3387	5.24e-06	1	TAGGCGGGCTTTGGA
203	mamo-L	BGIBMGA000378	up	610	624	+	10.9194	6.98e-05	1	AAGGCTTGTATTGTC
204	mamo-L	BGIBMGA000378	down	946	960	-	10.8306	7.52e-05	1	TAGGCCCCCTTCGCC
205	mamo-L	BGIBMGA000383	up	889	903	+	10.9113	7.02e-05	1	TAGGCTGATGGCACT
206	mamo-L	BGIBMGA000383	down	98	112	-	10.5726	9.33e-05	1	TAGGCTAATATTTAT
207	mamo-L	BGIBMGA000385	down	1150	1164	+	11.3871	4.55e-05	1	GAGGCTCGCGGTGTT
208	mamo-L	BGIBMGA000390	down	812	826	-	10.7661	7.95e-05	1	TAGGCCCTAGATTCT
209	mamo-L	BGIBMGA000394	up	430	444	-	11.9113	2.74e-05	1	TAGGCGTAGTTCGGA
210	mamo-L	BGIBMGA000394	down	541	555	-	11.2581	5.14e-05	1	TAGGCCGTTTACTCT
211	mamo-L	BGIBMGA000394	up	272	286	+	10.5403	9.58e-05	1	TAGGCTGTATGGTGT
212	mamo-L	BGIBMGA000398	up	1245	1259	+	12.5081	1.43e-05	1	TAGGCTAATTTTTTT
213	mamo-L	BGIBMGA000400	up	1370	1384	+	11.1694	5.59e-05	1	TAGGCCATATTTTCT
214	mamo-L	BGIBMGA000401	down	1175	1189	-	11.3468	4.73e-05	1	TAGGCCTTTATTGCA
215	mamo-L	BGIBMGA000406	down	1411	1425	-	12.0161	2.46e-05	1	TAGGCCGTGAATTTT
216	mamo-L	BGIBMGA000408	up	1958	1972	+	10.9839	6.59e-05	1	TAGGCCCTTGTTGAA
217	mamo-L	BGIBMGA000416	up	771	785	-	10.6129	9.03e-05	1	TAGGCCCGCATTTAC
218	mamo-L	BGIBMGA000426	up	1259	1273	+	11.379	4.58e-05	1	TAGGCAGACGTGTGT
219	mamo-L	BGIBMGA000431	up	1518	1532	+	10.5726	9.33e-05	1	TAGGCTAATATTTAT
220	mamo-L	BGIBMGA000434	up	838	852	+	12.1452	2.15e-05	1	TAGGCGGACTTCGGA
221	mamo-L	BGIBMGA000435	down	275	289	-	10.8468	7.42e-05	1	AAGGCTTATTGTGAT
222	mamo-L	BGIBMGA000435	down	1221	1235	-	10.8306	7.52e-05	1	TAGGCCCCCTTCGCC
223	mamo-L	BGIBMGA000437	down	1783	1797	+	11.5887	3.75e-05	1	AAGGCCCACGTTTCT
224	mamo-L	BGIBMGA000438	up	902	916	-	13.4677	4.39e-06	1	TAGGCTGATGATGAT
225	mamo-L	BGIBMGA000438	up	1786	1800	+	11.2097	5.38e-05	1	TAGGCTGGTTTTATA
226	mamo-L	BGIBMGA000439	up	1838	1852	+	10.5726	9.33e-05	1	TAGGCTAATATTTAT
227	mamo-L	BGIBMGA000440	up	1777	1791	+	10.5403	9.58e-05	1	TAGGCTGTATGGTGT
228	mamo-L	BGIBMGA000444	down	1072	1086	-	11.4919	4.11e-05	1	TAGGCGGTAATTTTT
229	mamo-L	BGIBMGA000446	up	1147	1161	+	12.0645	2.34e-05	1	TAGGCGGGCTTCGGA
230	mamo-L	BGIBMGA000446	up	994	1008	-	10.8306	7.52e-05	1	TAGGCCCCCTTCGCC
231	mamo-L	BGIBMGA000449	up	1196	1210	-	10.9677	6.68e-05	1	TAGGCTTAGGGCGCA
232	mamo-L	BGIBMGA000451	down	1567	1581	-	10.9919	6.55e-05	1	AAGGCTGTTTGTGGC
233	mamo-L	BGIBMGA000451	up	1141	1155	+	10.5726	9.33e-05	1	TAGGCTAATATTTAT
234	mamo-L	BGIBMGA000456	down	1512	1526	+	12.5968	1.28e-05	1	TAGGCTCTGTTTACT
235	mamo-L	BGIBMGA000459	down	423	437	+	12.1613	2.11e-05	1	TAGGCCTACATTGCA
236	mamo-L	BGIBMGA000464	up	1414	1428	-	11.4435	4.31e-05	1	GAGGCCTTTTTTTTT
237	mamo-L	BGIBMGA000464	up	1627	1641	+	10.5887	9.21e-05	1	TAGGCTTTGACTTTT
238	mamo-L	BGIBMGA000467	down	812	826	+	10.5403	9.58e-05	1	TAGGCCGATCTTGCA
239	mamo-L	BGIBMGA000470	down	1479	1493	-	10.621	8.97e-05	1	TAGGCTTGTGATTTA
240	mamo-L	BGIBMGA000473	up	617	631	+	11.0403	6.28e-05	1	TAGGCTGTATGTTAT
241	mamo-L	BGIBMGA000473	down	1912	1926	-	11.0081	6.45e-05	1	TAGGCCAACTTTTAC
242	mamo-L	BGIBMGA000476	up	99	113	+	12.0645	2.34e-05	1	TAGGCGGGCTTCGGA
243	mamo-L	BGIBMGA000479	up	1681	1695	-	10.7984	7.74e-05	1	TAGGCCTACGAAGCT
244	mamo-L	BGIBMGA000482	down	1693	1707	+	11.3306	4.8e-05	1	GAGGCTTTCTTTGGA
245	mamo-L	BGIBMGA000484	down	1239	1253	-	10.5645	9.4e-05	1	TAGGCTTTTTATCAT
246	mamo-L	BGIBMGA000490	down	517	531	-	11.9839	2.54e-05	1	TAGGCCTACAGTGCC
247	mamo-L	BGIBMGA000494	down	1205	1219	-	13.2419	5.96e-06	1	TAGGCCCATGTTTTT
248	mamo-L	BGIBMGA000495	down	1718	1732	+	13.2016	6.26e-06	1	TAGGCGGACGGTGAT
249	mamo-L	BGIBMGA000496	up	133	147	+	10.5726	9.33e-05	1	TAGCCTGTATTTGGT
250	mamo-L	BGIBMGA000499	down	208	222	-	11.3548	4.69e-05	1	TAGGCCACCGTTTTT
251	mamo-L	BGIBMGA000499	up	1365	1379	-	10.5323	9.63e-05	1	AAGGCGTTGTTCGAT
252	mamo-L	BGIBMGA000501	down	924	938	-	10.9194	6.98e-05	1	TAGGCTACTTTTTTT
253	mamo-L	BGIBMGA000502	down	1509	1523	-	10.5645	9.4e-05	1	TAGGCGGAGTGGTGC
254	mamo-L	BGIBMGA000503	up	1937	1951	+	11.9677	2.59e-05	1	TAGGCTTTGTGCTGT
255	mamo-L	BGIBMGA000504	up	1698	1712	-	10.6129	9.03e-05	1	TAGGCATGTGCTGGT
256	mamo-L	BGIBMGA000510	down	336	350	+	10.9194	6.98e-05	1	TAGGCTACTTTTTTT
257	mamo-L	BGIBMGA000513	up	1493	1507	+	11.7661	3.16e-05	1	TAGGCGTTGTTTTGA
258	mamo-L	BGIBMGA000515	up	1000	1014	+	13.8629	2.44e-06	1	TAGGCTCGGTATGGT
259	mamo-L	BGIBMGA000515	up	981	995	+	11.5161	4.02e-05	1	TAGGCTCTAGTTGGA
260	mamo-L	BGIBMGA000516	down	612	626	+	11.8871	2.81e-05	1	TAGGCTCGTAATGTT
261	mamo-L	BGIBMGA000517	up	1418	1432	-	11.4032	4.49e-05	1	GAGGCCGGGATTTCT
262	mamo-L	BGIBMGA000519	down	872	886	+	11.3548	4.69e-05	1	AAGGCTGATGATGAT
263	mamo-L	BGIBMGA000519	down	1936	1950	-	10.6855	8.51e-05	1	TAGGCCCTGATGGCC
264	mamo-L	BGIBMGA000525	up	1313	1327	-	13.7016	3.11e-06	1	TAGGCTTCTGTTGCT
265	mamo-L	BGIBMGA000527	up	781	795	+	10.5806	9.27e-05	1	TAGGCGTTCGTTACA
266	mamo-L	BGIBMGA000529	down	1955	1969	+	11.8065	3.03e-05	1	TAGGCTGACGATCAT
267	mamo-L	BGIBMGA000536	up	163	177	+	11.5726	3.81e-05	1	TAGGCAGACGGTGAT
268	mamo-L	BGIBMGA000537	down	418	432	+	11.2823	5.03e-05	1	TAGGCCTGGTTTATA
269	mamo-L	BGIBMGA000538	up	882	896	-	10.5403	9.58e-05	1	AAGGCTCTGGATTGT
270	mamo-L	BGIBMGA000541	up	1861	1875	+	11.2581	5.14e-05	1	TAGGCTGAGGCTGGG
271	mamo-L	BGIBMGA000542	up	1793	1807	+	10.5403	9.58e-05	1	TAGGCTGTATGGTGT
272	mamo-L	BGIBMGA000546	up	954	968	+	11.7984	3.06e-05	1	TAGGCACGCGTTGAT
273	mamo-L	BGIBMGA000551	up	119	133	-	12.1694	2.09e-05	1	TAGGCCGACTAGGGC
274	mamo-L	BGIBMGA000551	down	718	732	-	12.129	2.19e-05	1	TAGGCTTTTTTGTTT
275	mamo-L	BGIBMGA000551	up	1938	1952	+	10.6855	8.51e-05	1	TAGGCTTGCGATTCG
276	mamo-L	BGIBMGA000552	up	1844	1858	+	10.7823	7.84e-05	1	AAGGCCGACTTTTAC
277	mamo-L	BGIBMGA000553	up	1645	1659	+	10.5726	9.33e-05	1	TAGGCTAATATTTAT
278	mamo-L	BGIBMGA000553	down	506	520	+	10.5081	9.83e-05	1	TAGGCCTATAATTTC
279	mamo-L	BGIBMGA000555	down	1203	1217	+	10.5726	9.33e-05	1	TAGGCTAATATTTAT
280	mamo-L	BGIBMGA000560	down	793	807	+	11.75	3.21e-05	1	TAGGCACACTTTGAT
281	mamo-L	BGIBMGA000561	down	1860	1874	+	10.6855	8.51e-05	1	TAGGCCGCAATTTCT
282	mamo-L	BGIBMGA000562	up	1856	1870	+	10.7581	8e-05	1	TAGGCCTTATTTCTC
283	mamo-L	BGIBMGA000564	up	539	553	-	10.7177	8.28e-05	1	AAGGCCGAGGATCGT
284	mamo-L	BGIBMGA000570	down	796	810	+	13.5968	3.65e-06	1	TAGGCCGTGGTTTTC
285	mamo-L	BGIBMGA000573	up	1684	1698	-	11.0242	6.36e-05	1	TAGGCTGATGACATT
286	mamo-L	BGIBMGA000574	down	1336	1350	+	11.8065	3.03e-05	1	TAGGCTAATGTTTAT
287	mamo-L	BGIBMGA000575	up	1369	1383	-	12.4919	1.46e-05	1	TAGGCTGAAATTTTT
288	mamo-L	BGIBMGA000577	up	213	227	-	10.7581	8e-05	1	TACGCTTGGTTTGTT
289	mamo-L	BGIBMGA000582	up	117	131	+	11.9919	2.52e-05	1	TAGGCGTGATTGGTT
290	mamo-L	BGIBMGA000582	up	161	175	-	10.5806	9.27e-05	1	TAGGCTGGGACGGTT
291	mamo-L	BGIBMGA000583	up	1211	1225	-	12.0726	2.32e-05	1	TAGGCAGTTATTGGT
292	mamo-L	BGIBMGA000585	down	489	503	-	11.7016	3.37e-05	1	TAGGCCCGGTTTCAT
293	mamo-L	BGIBMGA000585	up	489	503	+	11.3548	4.69e-05	1	AAGGCTGATGATGAT
294	mamo-L	BGIBMGA000590	down	950	964	-	10.5081	9.83e-05	1	TAGGCGGGGTGTTGG
295	mamo-L	BGIBMGA000594	up	1455	1469	-	11.7339	3.26e-05	1	TAGGCTATGTTTTCC
296	mamo-L	BGIBMGA000595	down	293	307	+	14.4597	9.75e-07	1	TAGGCTTGTGTTTGT
297	mamo-L	BGIBMGA000598	down	258	272	-	10.5484	9.52e-05	1	TAGGCGCCATTTTGT
298	mamo-L	BGIBMGA000603	down	659	673	+	10.5484	9.52e-05	1	TAGGCATCGTTCGCT
299	mamo-L	BGIBMGA000604	down	835	849	+	12.5726	1.33e-05	1	AAGGCTTACGTTTCT
300	mamo-L	BGIBMGA000605	up	1971	1985	+	12.5726	1.33e-05	1	AAGGCTTACGTTTCT
301	mamo-L	BGIBMGA000605	up	819	833	+	11.5968	3.73e-05	1	AAGGCTTACGTTTCC
302	mamo-L	BGIBMGA000612	up	88	102	-	11.3548	4.69e-05	1	AAGGCTGATGATGAT
303	mamo-L	BGIBMGA000613	down	1872	1886	+	11.3629	4.66e-05	1	TAGGCTAATGTCTTT
304	mamo-L	BGIBMGA000616	up	1927	1941	+	11.5242	3.99e-05	1	TAGGCGTGGTCTGAT
305	mamo-L	BGIBMGA000616	down	1786	1800	-	11.2661	5.1e-05	1	TAGGCTGAAGATGCA
306	mamo-L	BGIBMGA000629	down	499	513	-	11.1935	5.45e-05	1	TAGGCAGGGGTTGTG
307	mamo-L	BGIBMGA000632	up	1653	1667	-	11.1048	5.92e-05	1	TAGGCTAGTTATTTT
308	mamo-L	BGIBMGA000637	up	378	392	+	10.7742	7.89e-05	1	TAGGCCAAGGTTTCA
309	mamo-L	BGIBMGA000637	up	1462	1476	-	10.5726	9.33e-05	1	TAGGCTAATATTTAT
310	mamo-L	BGIBMGA000637	down	1109	1123	+	10.5403	9.58e-05	1	AAGGCTTTTCTTGGT
311	mamo-L	BGIBMGA000638	down	1333	1347	-	12.7984	1.02e-05	1	TAGGCTTGGGAGGCT
312	mamo-L	BGIBMGA000640	down	524	538	-	10.879	7.22e-05	1	TAGGCTAAATTTTAT
313	mamo-L	BGIBMGA000644	up	1862	1876	+	11.0968	5.97e-05	1	TAGGCGTATTCTTGT
314	mamo-L	BGIBMGA000644	up	747	761	+	10.5726	9.33e-05	1	TAGGCTAATATTTAT
315	mamo-L	BGIBMGA000645	up	1028	1042	-	11.2581	5.14e-05	1	AAGGCCGAAATTGCT
316	mamo-L	BGIBMGA000647	up	18	32	+	10.7339	8.17e-05	1	TAGGCCACTTTTTTT
317	mamo-L	BGIBMGA000649	down	977	991	-	14.3306	1.21e-06	1	TAGGCCGTCGTCGTT
318	mamo-L	BGIBMGA000651	down	1533	1547	-	10.7581	8e-05	1	TAGGCCGTGCTCGTC
319	mamo-L	BGIBMGA000652	up	1480	1494	+	10.8548	7.38e-05	1	TAGGCATACGTGGCC
320	mamo-L	BGIBMGA000657	down	1389	1403	-	14.8548	4.5e-07	1	TAGGCTTACTTTGAT
321	mamo-L	BGIBMGA000657	down	1741	1755	+	11.1774	5.54e-05	1	TAGGCTAAGTTTTGA
322	mamo-L	BGIBMGA000657	up	23	37	+	11.1048	5.92e-05	1	TAGGCGTTTAATGGC
323	mamo-L	BGIBMGA000662	up	588	602	+	10.629	8.91e-05	1	TAGGCTTTGTACGTA
324	mamo-L	BGIBMGA000664	down	1067	1081	+	10.7823	7.84e-05	1	TAGGCTATTTGTTTT
325	mamo-L	BGIBMGA000665	up	201	215	-	13.4435	4.51e-06	1	TAGGCTTAGTTGGGC
326	mamo-L	BGIBMGA000665	down	1682	1696	+	11.4435	4.31e-05	1	TAGGCTTAGTTGAGC
327	mamo-L	BGIBMGA000667	up	1370	1384	-	10.7258	8.23e-05	1	TAGGCTTAGGAGCCT
328	mamo-L	BGIBMGA000668	down	1035	1049	-	10.5081	9.83e-05	1	TAGGCCTATAATTTC
329	mamo-L	BGIBMGA000669	up	1078	1092	+	12.2097	2.01e-05	1	TAGGCTTGAGGTGAT
330	mamo-L	BGIBMGA000674	up	426	440	-	11.3548	4.69e-05	1	AAGGCTGATGATGAT
331	mamo-L	BGIBMGA000677	up	260	274	-	10.6129	9.03e-05	1	TAGGCACTCTTGGTT
332	mamo-L	BGIBMGA000678	down	899	913	-	10.8871	7.17e-05	1	TAGGCTGTGTCTGTA
333	mamo-L	BGIBMGA000680	up	1152	1166	+	11.9677	2.59e-05	1	AAGGCTTTTATTGGT
334	mamo-L	BGIBMGA000683	up	263	277	-	11.2581	5.14e-05	1	TAGGCTGAGGCTGGG
335	mamo-L	BGIBMGA000690	down	1484	1498	+	12.5887	1.3e-05	1	TAGGCAGACTGTGGT
336	mamo-L	BGIBMGA000690	down	246	260	-	10.7016	8.39e-05	1	TAGGCCTATTTGAGC
337	mamo-L	BGIBMGA000691	up	176	190	+	12.5887	1.3e-05	1	TAGGCAGACTGTGGT
338	mamo-L	BGIBMGA000696	down	1158	1172	+	12.25	1.92e-05	1	TAGGCGATAGTTGGT
339	mamo-L	BGIBMGA000697	down	1715	1729	+	11.8952	2.79e-05	1	TAGGCCATGTTTTGC
340	mamo-L	BGIBMGA000698	down	306	320	-	10.5565	9.46e-05	1	TAGGCAGACGATTAT
341	mamo-L	BGIBMGA000701	up	904	918	+	12.0161	2.46e-05	1	AAGGCTTACGTTAGT
342	mamo-L	BGIBMGA000703	up	883	897	-	11.5887	3.75e-05	1	GAGGCCCACGTTTTT
343	mamo-L	BGIBMGA000704	down	987	1001	-	10.9194	6.98e-05	1	AAGGCCTATGTTTCC
344	mamo-L	BGIBMGA000706	down	1801	1815	+	12.1855	2.06e-05	1	GAGGCCGTCGTCGTT
345	mamo-L	BGIBMGA000708	up	587	601	+	10.6694	8.62e-05	1	TAGGCGACAGTTGTT
346	mamo-L	BGIBMGA000711	up	1388	1402	+	11.25	5.18e-05	1	TAGGCGCTCTCTGTT
347	mamo-L	BGIBMGA000713	down	17	31	-	14.5	9.07e-07	1	TAGGCTGTAGTTGTT
348	mamo-L	BGIBMGA000715	up	364	378	+	10.7984	7.74e-05	1	TAGGCGTGGGCTAGT
349	mamo-L	BGIBMGA000717	down	1425	1439	-	10.6371	8.85e-05	1	TAGGCTTTTTTTACA
350	mamo-L	BGIBMGA000719	down	922	936	-	11.1935	5.45e-05	1	TAGGCGCATGAGGGT
351	mamo-L	BGIBMGA000720	up	590	604	-	11.1935	5.45e-05	1	TAGGCGCATGAGGGT
352	mamo-L	BGIBMGA000725	up	300	314	+	11.621	3.63e-05	1	AAGGCTTTTATTGCT
353	mamo-L	BGIBMGA000726	down	945	959	-	10.9194	6.98e-05	1	TAGGCTACTTTTTTT
354	mamo-L	BGIBMGA000729	up	1663	1677	-	11.9919	2.52e-05	1	AAGGCCGTTGATGGT
355	mamo-L	BGIBMGA000730	down	1752	1766	+	13.2419	5.96e-06	1	TAGGCCCATGTTTTT
356	mamo-L	BGIBMGA000731	up	1704	1718	+	11.8387	2.94e-05	1	TAGGCATGTGTTTTT
357	mamo-L	BGIBMGA000732	down	927	941	-	10.9194	6.98e-05	1	TAGGCTACTTTTTTT
358	mamo-L	BGIBMGA000732	down	1946	1960	+	10.5	9.9e-05	1	GAGGCCCAGGTCGTC
359	mamo-L	BGIBMGA000734	up	355	369	-	12.2016	2.03e-05	1	TAGGCTGTAGATGTC
360	mamo-L	BGIBMGA000734	down	645	659	+	10.9194	6.98e-05	1	TAGGCTACTTTTTTT
361	mamo-L	BGIBMGA000735	down	1983	1997	+	10.5484	9.52e-05	1	TAGGCGGGCTTGGAA
362	mamo-L	BGIBMGA000737	down	1594	1608	-	10.5	9.9e-05	1	GAGGCCCAGGTCGTC
363	mamo-L	BGIBMGA000741	up	1518	1532	+	11.0887	6.01e-05	1	TAGGCGAGTGTTGGA
364	mamo-L	BGIBMGA000742	down	1904	1918	+	11.8548	2.89e-05	1	AAGGCTGTTGTGGGT
365	mamo-L	BGIBMGA000742	up	1632	1646	-	11.0968	5.97e-05	1	TAGGCCGAGCTTGCA
366	mamo-L	BGIBMGA000745	down	1461	1475	+	12.1935	2.05e-05	1	TAGGCTTAAATTTTT
367	mamo-L	BGIBMGA000749	up	1393	1407	-	11.9677	2.59e-05	1	TAGGCCGTCTGCGAT
368	mamo-L	BGIBMGA000752	up	1095	1109	+	11.6129	3.66e-05	1	TAGGCTTTTAATGAT
369	mamo-L	BGIBMGA000752	up	755	769	-	10.621	8.97e-05	1	TAGGCTTTTGGTATC
370	mamo-L	BGIBMGA000753	up	435	449	-	10.8952	7.12e-05	1	TAGGCTGTATGTTTC
371	mamo-L	BGIBMGA000753	down	368	382	-	10.5968	9.15e-05	1	GAGGCTAGTTTTTGT
372	mamo-L	BGIBMGA000758	down	1314	1328	+	12.7742	1.04e-05	1	TAGGCCTATTGTGAT
373	mamo-L	BGIBMGA000759	down	961	975	+	11.879	2.83e-05	1	TAGGCCCGTGGTGTC
374	mamo-L	BGIBMGA000760	down	149	163	-	10.5726	9.33e-05	1	TAGGCTAATATTTAT
375	mamo-L	BGIBMGA000761	up	205	219	-	11.5484	3.9e-05	1	AAGGCGGAGGTTCGT
376	mamo-L	BGIBMGA000763	down	525	539	-	12.5968	1.28e-05	1	AAGGCTTAATTTGGT
377	mamo-L	BGIBMGA000764	up	1822	1836	+	12.0806	2.31e-05	1	TGGGCTTGGTTTGTT
378	mamo-L	BGIBMGA000767	up	1809	1823	-	11.9274	2.69e-05	1	GAGGCTTTGTATGCT
379	mamo-L	BGIBMGA000767	up	492	506	-	11.6774	3.44e-05	1	TCGGCTGACTTTGCT
380	mamo-L	BGIBMGA000769	up	316	330	+	11.0484	6.23e-05	1	TAGGCGGTCATTAAT
381	mamo-L	BGIBMGA000770	up	15	29	+	11.5323	3.96e-05	1	TAGGCGTGAGGTGAT
382	mamo-L	BGIBMGA000770	down	1445	1459	-	11.0887	6.01e-05	1	TAGGCCGCTTTTGCG
383	mamo-L	BGIBMGA000773	up	964	978	+	12.25	1.92e-05	1	TAGGCCCACTATTCT
384	mamo-L	BGIBMGA000775	down	689	703	-	12.6855	1.16e-05	1	TAGGCGTTCTTTATT
385	mamo-L	BGIBMGA000775	up	282	296	-	10.5484	9.52e-05	1	GAGGCGTTAGTTGAT
386	mamo-L	BGIBMGA000776	down	1375	1389	-	11.3306	4.8e-05	1	TAGGCTTACTATGAA
387	mamo-L	BGIBMGA000776	down	1772	1786	-	10.9194	6.98e-05	1	TAGGCTACTTTTTTT
388	mamo-L	BGIBMGA000777	up	89	103	-	11.3306	4.8e-05	1	TAGGCTTACTATGAA
389	mamo-L	BGIBMGA000777	up	486	500	-	10.9194	6.98e-05	1	TAGGCTACTTTTTTT
390	mamo-L	BGIBMGA000778	up	1495	1509	+	10.9194	6.98e-05	1	TAGGCTACTTTTTTT
391	mamo-L	BGIBMGA000780	up	91	105	+	10.9355	6.88e-05	1	TAGGCCGCCTTCATT
392	mamo-L	BGIBMGA000781	up	1547	1561	-	11.3065	4.91e-05	1	GAGGCTGTGGTCTCT
393	mamo-L	BGIBMGA000785	down	741	755	+	10.6694	8.62e-05	1	TAGGCCCTGTGCTTT
394	mamo-L	BGIBMGA000788	up	1624	1638	+	11.4194	4.42e-05	1	AAGGCTTGCTTTTTC
395	mamo-L	BGIBMGA000790	down	1723	1737	+	11.6855	3.42e-05	1	TAGGCGCTCTTTGTA
396	mamo-L	BGIBMGA000791	up	41	55	+	11.2016	5.41e-05	1	TAGGCAAAGGTTTGT
397	mamo-L	BGIBMGA000792	down	597	611	-	12.6371	1.23e-05	1	TAGGCTCGTTTGGCT
398	mamo-L	BGIBMGA000796	up	1358	1372	+	10.7177	8.28e-05	1	TAGGCTTAGTTTAAA
399	mamo-L	BGIBMGA000798	down	643	657	-	10.8387	7.47e-05	1	TAGGCTTGAGACGCC
400	mamo-L	BGIBMGA000799	up	71	85	-	11.5323	3.96e-05	1	TAGGCGTGAGGTGAT
401	mamo-L	BGIBMGA000801	down	189	203	+	11.3871	4.55e-05	1	GAGGCTCGTTTTTGT
402	mamo-L	BGIBMGA000809	up	617	631	-	11.0242	6.36e-05	1	TAGGCTTGAATTCCT
403	mamo-L	BGIBMGA000810	down	1246	1260	+	10.5726	9.33e-05	1	TAGGCTAATATTTAT
404	mamo-L	BGIBMGA000813	down	46	60	+	11.0806	6.05e-05	1	AAGGCTTTTGTTGAC
405	mamo-L	BGIBMGA000821	down	1370	1384	+	10.5968	9.15e-05	1	GAGGCTAGTTTTTGT
406	mamo-L	BGIBMGA000822	up	1735	1749	+	10.8952	7.12e-05	1	TAGGCTGTATGTTTC
407	mamo-L	BGIBMGA000825	down	359	373	-	11.8145	3.01e-05	1	TAGGCGGAAGATGCC
408	mamo-L	BGIBMGA000826	up	1130	1144	-	12.1048	2.24e-05	1	TAGGCATATTTTTGT
409	mamo-L	BGIBMGA000826	up	743	757	+	11.6532	3.53e-05	1	AAGGCGTGGGATGCT
410	mamo-L	BGIBMGA000830	down	76	90	+	11.6935	3.39e-05	1	GAGGCTATGTTTGTT
411	mamo-L	BGIBMGA000830	down	1402	1416	-	11.0887	6.01e-05	1	AAGGCCGCCTATGGT
412	mamo-L	BGIBMGA000831	up	922	936	+	11.9435	2.65e-05	1	GAGGCTTTTTTTTGT
413	mamo-L	BGIBMGA000836	down	618	632	-	11.4758	4.18e-05	1	TAGGCCTTATGTGCC
414	mamo-L	BGIBMGA000836	up	67	81	-	11.2016	5.41e-05	1	AAGGCTTAGATGGGT
415	mamo-L	BGIBMGA000838	down	896	910	+	10.6452	8.79e-05	1	TAGGCTGATGTGTCA
416	mamo-L	BGIBMGA000840	up	1902	1916	+	12.5161	1.42e-05	1	TAGGCGCATGTGGGT
417	mamo-L	BGIBMGA000842	up	982	996	+	11.75	3.21e-05	1	TAGGCTTACATTAAT
418	mamo-L	BGIBMGA000842	down	740	754	-	10.75	8.06e-05	1	GAGGCCGATTGTGCC
419	mamo-L	BGIBMGA000843	down	194	208	+	12.629	1.24e-05	1	TAGGCTAATTTTGTC
420	mamo-L	BGIBMGA000843	down	1500	1514	-	11.5968	3.73e-05	1	GAGGCCGTGGTTTAT
421	mamo-L	BGIBMGA000846	down	1790	1804	-	12.6371	1.23e-05	1	TAGGCGGAGTGGGGT
422	mamo-L	BGIBMGA000851	up	138	152	+	11.5323	3.96e-05	1	TAGGCGTGAGGTGAT
423	mamo-L	BGIBMGA000852	up	1497	1511	+	12.621	1.25e-05	1	TAGGCCGACATTTTC
424	mamo-L	BGIBMGA000853	up	1180	1194	+	11.7581	3.18e-05	1	TAGGCGGGGTTGGGA
425	mamo-L	BGIBMGA000859	down	829	843	-	11.3145	4.87e-05	1	TAGGCAGGCTTTGGG
426	mamo-L	BGIBMGA000860	down	617	631	+	10.75	8.06e-05	1	GAGGCCGATTGTGCC
427	mamo-L	BGIBMGA000863	down	118	132	-	11.6855	3.42e-05	1	TAGGCTGATTGCTCT
428	mamo-L	BGIBMGA000863	up	1523	1537	-	10.7177	8.28e-05	1	TAGGCTTATTTGAAT
429	mamo-L	BGIBMGA000864	up	997	1011	-	11.6855	3.42e-05	1	TAGGCTGATTGCTCT
430	mamo-L	BGIBMGA000866	up	364	378	+	10.9194	6.98e-05	1	TAGGCTACTTTTTTT
431	mamo-L	BGIBMGA000866	down	1447	1461	+	10.5	9.9e-05	1	TAGCCTGATGTTGCC
432	mamo-L	BGIBMGA000867	up	300	314	+	10.5	9.9e-05	1	TAGCCTGATGTTGCC
433	mamo-L	BGIBMGA000870	down	1003	1017	-	10.5403	9.58e-05	1	TAGGCTTTAATGTGT
434	mamo-L	BGIBMGA000871	up	1566	1580	-	12.0161	2.46e-05	1	GAGGCGGATGTTTGT
435	mamo-L	BGIBMGA000871	up	1427	1441	-	10.9839	6.59e-05	1	TAGGCCGACGTGTTA
436	mamo-L	BGIBMGA000872	down	1320	1334	-	13.8548	2.48e-06	1	TAGGCGGATGGTGGT
437	mamo-L	BGIBMGA000874	up	1883	1897	+	10.5323	9.63e-05	1	TAGGCTCTGTAGTCT
438	mamo-L	BGIBMGA000879	down	1453	1467	+	13.5242	4.05e-06	1	TAGGCTGTTTTGGTT
439	mamo-L	BGIBMGA000882	down	1155	1169	+	10.75	8.06e-05	1	GAGGCCGATTGTGCC
440	mamo-L	BGIBMGA000885	up	1819	1833	-	10.8871	7.17e-05	1	TAGGCCTACATAGCT
441	mamo-L	BGIBMGA000885	up	1826	1840	+	10.5806	9.27e-05	1	TAGGCCTACGATTCG
442	mamo-L	BGIBMGA000886	up	828	842	-	11.9355	2.67e-05	1	TAGGCTCACGGGGCT
443	mamo-L	BGIBMGA000886	up	1821	1835	-	10.8871	7.17e-05	1	TAGGCCTACATAGCT
444	mamo-L	BGIBMGA000886	up	1828	1842	+	10.5806	9.27e-05	1	TAGGCCTACGATTCG
445	mamo-L	BGIBMGA000887	up	485	499	+	11.4597	4.25e-05	1	TAGGCGCTTATTGAT
446	mamo-L	BGIBMGA000889	down	1277	1291	-	11.4274	4.38e-05	1	TAGGCTTGCGTAGAT
447	mamo-L	BGIBMGA000892	up	1089	1103	+	11.6452	3.56e-05	1	TAGGCCTTGGTTTCG
448	mamo-L	BGIBMGA000892	up	966	980	-	10.6855	8.51e-05	1	TAGGCCGGTAGTACT
449	mamo-L	BGIBMGA000893	down	919	933	-	11.4435	4.31e-05	1	TAGGCGCGTAGTGGT
450	mamo-L	BGIBMGA000895	down	431	445	-	12.0645	2.34e-05	1	TAGGCGGGCTTCGGA
451	mamo-L	BGIBMGA000895	up	644	658	-	11.7903	3.08e-05	1	TAGGCTTCGTTCTTT
452	mamo-L	BGIBMGA000899	down	1594	1608	-	11.1694	5.59e-05	1	AAGGCTTTAATTGGT
453	mamo-L	BGIBMGA000904	down	361	375	+	10.9194	6.98e-05	1	TAGGCTACTTTTTTT
454	mamo-L	BGIBMGA000909	up	1194	1208	-	11.621	3.63e-05	1	TAGGCCTTCTTCGGG
455	mamo-L	BGIBMGA000913	down	994	1008	+	10.5726	9.33e-05	1	TAGGCTAATATTTAT
456	mamo-L	BGIBMGA000914	up	996	1010	+	10.5726	9.33e-05	1	TAGGCTAATATTTAT
457	mamo-L	BGIBMGA000919	up	125	139	+	12.5081	1.43e-05	1	TAGGCTTCTTTTTTT
458	mamo-L	BGIBMGA000919	down	1037	1051	-	12.2419	1.94e-05	1	TAGGCTCATTATGAT
459	mamo-L	BGIBMGA000919	down	1916	1930	+	12.1371	2.17e-05	1	GAGGCTTGATTTGCT
460	mamo-L	BGIBMGA000924	down	734	748	-	11.2742	5.06e-05	1	TAGGCATGCGTTCTT
461	mamo-L	BGIBMGA000924	down	908	922	+	10.7097	8.33e-05	1	TAGGCCGAATTGCTT
462	mamo-L	BGIBMGA000926	down	1339	1353	-	11.4113	4.45e-05	1	TAGGCTGAGCTTTCC
463	mamo-L	BGIBMGA000927	up	504	518	-	11.4113	4.45e-05	1	TAGGCTGAGCTTTCC
464	mamo-L	BGIBMGA000928	down	536	550	-	13.1452	6.69e-06	1	TAGGCTGTTGATGAT
465	mamo-L	BGIBMGA000928	up	1063	1077	+	10.5081	9.83e-05	1	GAGGCCCGGTTTACT
466	mamo-L	BGIBMGA000936	down	1370	1384	+	13.9113	2.26e-06	1	TAGGCCTATTTTTTT
467	mamo-L	BGIBMGA000942	down	1561	1575	-	10.5806	9.27e-05	1	TAGGCCTCCTTTTCA
468	mamo-L	BGIBMGA000943	up	1172	1186	-	11.0806	6.05e-05	1	GAGGCTTTGATTTTT
469	mamo-L	BGIBMGA000947	up	412	426	-	10.9194	6.98e-05	1	AAGGCGCGCTTTTTT
470	mamo-L	BGIBMGA000958	down	1853	1867	-	13.0887	7.18e-06	1	TAGGCTTGAGATGCT
471	mamo-L	BGIBMGA000959	up	1460	1474	-	14	1.98e-06	1	TAGGCTGCTGTTGCT
472	mamo-L	BGIBMGA000967	down	299	313	+	11.7177	3.32e-05	1	TAGGCTTGTTATTTC
473	mamo-L	BGIBMGA000968	up	1192	1206	+	11.7177	3.32e-05	1	TAGGCTTGTTATTTC
474	mamo-L	BGIBMGA000969	down	1009	1023	-	11.7339	3.26e-05	1	TAGGCTGAAGGTAGT
475	mamo-L	BGIBMGA000969	down	65	79	-	10.7581	8e-05	1	TAGGCTTAGATTAGA
476	mamo-L	BGIBMGA000978	down	478	492	-	11.0726	6.09e-05	1	TAGGCTGCTTTTAAT
477	mamo-L	BGIBMGA000983	down	566	580	-	11.1935	5.45e-05	1	TAGGCGCATGAGGGT
478	mamo-L	BGIBMGA000984	down	932	946	-	10.5161	9.77e-05	1	TAGGCCGCCTTTTTG
479	mamo-L	BGIBMGA000985	down	1510	1524	+	10.879	7.22e-05	1	TAGGCCGCCGGCTGT
480	mamo-L	BGIBMGA000985	up	1039	1053	-	10.5161	9.77e-05	1	TAGGCCGCCTTTTTG
481	mamo-L	BGIBMGA000986	up	1590	1604	-	10.9113	7.02e-05	1	AAGGCTCAGTTTTAT
482	mamo-L	BGIBMGA000988	up	1825	1839	-	12.9597	8.38e-06	1	TAGGCTGATCTTGTT
483	mamo-L	BGIBMGA000989	up	554	568	-	10.5726	9.33e-05	1	TAGGCTAATATTTAT
484	mamo-L	BGIBMGA000991	up	256	270	-	13.6371	3.42e-06	1	AAGGCTTAGTTTGTT
485	mamo-L	BGIBMGA000991	down	1613	1627	+	13.0565	7.51e-06	1	TAGGCGTGGGGTGGC
486	mamo-L	BGIBMGA000992	up	125	139	+	13.0565	7.51e-06	1	TAGGCGTGGGGTGGC
487	mamo-L	BGIBMGA000994	up	1027	1041	-	12.0645	2.34e-05	1	TAGGCGGGCTTCGGA
488	mamo-L	BGIBMGA000995	up	932	946	-	14.3952	1.09e-06	1	TAGGCCTTCTTTTGT
489	mamo-L	BGIBMGA000997	down	1436	1450	-	11.1452	5.7e-05	1	TAGGCTTCTAATGCT
490	mamo-L	BGIBMGA000998	up	1432	1446	+	10.5403	9.58e-05	1	TAGGCTGTATGGTGT
491	mamo-L	BGIBMGA000999	up	12	26	+	11.7097	3.34e-05	1	TAGGCAGTCTTGGTT
492	mamo-L	BGIBMGA001001	down	893	907	-	11.2097	5.38e-05	1	TAGGCCCAAATTTTT
493	mamo-L	BGIBMGA001004	up	1958	1972	+	11.1129	5.88e-05	1	AAGGCTTTGTTTGTA
494	mamo-L	BGIBMGA001004	up	1127	1141	-	10.5	9.9e-05	1	GAGGCCCAGGTCGTC
495	mamo-L	BGIBMGA001006	up	542	556	+	11.5484	3.9e-05	1	GAGGCTTGGGTCGAT
496	mamo-L	BGIBMGA001008	down	1222	1236	+	11.5887	3.75e-05	1	TAGGCGTTGTTCGGA
497	mamo-L	BGIBMGA001013	down	1575	1589	-	11.6935	3.39e-05	1	TAGGCGTGTTTGTTT
498	mamo-L	BGIBMGA001016	up	421	435	-	10.5403	9.58e-05	1	TAGGCTGTATGGTGT
499	mamo-L	BGIBMGA001018	up	137	151	-	10.9194	6.98e-05	1	TAGGCTACTTTTTTT
500	mamo-L	BGIBMGA001018	up	1265	1279	-	10.5565	9.46e-05	1	AAGGCTTTTATTTTT
501	mamo-L	BGIBMGA001026	up	1913	1927	+	10.5726	9.33e-05	1	TAGGCTAATATTTAT
502	mamo-L	BGIBMGA001029	up	1029	1043	-	11.371	4.62e-05	1	TAGGCTGTATAGGCT
503	mamo-L	BGIBMGA001033	down	1714	1728	+	10.6371	8.85e-05	1	TAGGCATATTTCGTC
504	mamo-L	BGIBMGA001034	down	470	484	-	11.2177	5.34e-05	1	AAGGCCGATGTCGAT
505	mamo-L	BGIBMGA001036	down	1747	1761	-	11.8548	2.89e-05	1	TAGGCTGGGGTGGTG
506	mamo-L	BGIBMGA001042	up	1269	1283	-	10.5323	9.63e-05	1	TCGGCTGGCTTTTTT
507	mamo-L	BGIBMGA001043	down	1850	1864	-	10.9839	6.59e-05	1	TAGGCATTATTTTGT
508	mamo-L	BGIBMGA001044	down	1195	1209	+	11.371	4.62e-05	1	TAGGCTTAGATCATT
509	mamo-L	BGIBMGA001044	up	803	817	+	11.0323	6.32e-05	1	TAGGCTGGGAGGTGT
510	mamo-L	BGIBMGA001046	up	415	429	-	12.4113	1.6e-05	1	TAGGCTCGAATTGTT
511	mamo-L	BGIBMGA001047	down	1117	1131	-	10.7581	8e-05	1	TAGGCTAACAGTGAT
512	mamo-L	BGIBMGA001049	down	423	437	+	12.0968	2.26e-05	1	TAGGCTTAAGTGTGT
513	mamo-L	BGIBMGA001050	down	1755	1769	+	10.6532	8.73e-05	1	GAGGCTTTTTTTTTC
514	mamo-L	BGIBMGA001052	up	1790	1804	-	12.8952	9.05e-06	1	TAGGCTTGTCTTGGT
515	mamo-L	BGIBMGA001053	down	1717	1731	-	13.4677	4.39e-06	1	TAGGCTGATGATGAT
516	mamo-L	BGIBMGA001056	up	1346	1360	-	11.4435	4.31e-05	1	TAGGCTTGAGAGGCT
517	mamo-L	BGIBMGA001059	up	1284	1298	+	13.0968	7.11e-06	1	TAGGCTGTTTTTTTC
518	mamo-L	BGIBMGA001062	down	255	269	+	12.7177	1.12e-05	1	AAGGCTGATTTTGGC
519	mamo-L	BGIBMGA001064	up	1224	1238	-	10.9435	6.83e-05	1	TAGGCGTATTTGTAT
520	mamo-L	BGIBMGA001065	down	915	929	-	12.1613	2.11e-05	1	TAGGCTGAATGTTCT
521	mamo-L	BGIBMGA001067	up	1405	1419	+	11.2258	5.3e-05	1	TAGGCCTTTTTCCCT
522	mamo-L	BGIBMGA001067	up	205	219	-	10.9194	6.98e-05	1	TAGGCTACTTTTTTT
523	mamo-L	BGIBMGA001074	up	1493	1507	-	10.5726	9.33e-05	1	TAGGCTAATATTTAT
524	mamo-L	BGIBMGA001076	down	1523	1537	-	11.9274	2.69e-05	1	GAGGCCTTCATTGTT
525	mamo-L	BGIBMGA001076	up	1785	1799	-	10.7661	7.95e-05	1	AAGGCTGGTGTTAGC
526	mamo-L	BGIBMGA001086	down	1619	1633	+	12.5806	1.31e-05	1	AAGGCGGGCGTTGGC
527	mamo-L	BGIBMGA001088	up	530	544	+	12.3468	1.72e-05	1	TAGGCTGAGAACGTT
528	mamo-L	BGIBMGA001088	up	511	525	+	10.5726	9.33e-05	1	TAGGCTGACAATTGA
529	mamo-L	BGIBMGA001089	up	487	501	-	11.7177	3.32e-05	1	TCGGCCGAGGTTGTT
530	mamo-L	BGIBMGA001091	down	420	434	-	13.3226	5.34e-06	1	TAGGCTCTGGGTGCT
531	mamo-L	BGIBMGA001091	up	1649	1663	+	10.9355	6.88e-05	1	TAGGCGGTGGTGGTG
532	mamo-L	BGIBMGA001096	up	1334	1348	-	12.1613	2.11e-05	1	TAGGCCTTTGTGGCC
533	mamo-L	BGIBMGA001097	up	259	273	-	11.5887	3.75e-05	1	TAGGCATGCGTTCGT
534	mamo-L	BGIBMGA001103	up	78	92	-	12.3548	1.7e-05	1	TAGGCTTTCTTTACC
535	mamo-L	BGIBMGA001105	up	151	165	+	11.4435	4.31e-05	1	TAGGCTTGAGAGGCT
536	mamo-L	BGIBMGA001106	up	240	254	+	11.1694	5.59e-05	1	TAGGCTGAAAATTTT
537	mamo-L	BGIBMGA001110	down	700	714	+	13.9758	2.07e-06	1	TAGGCGTAGTTTTTT
538	mamo-L	BGIBMGA001110	up	1043	1057	+	12.5726	1.33e-05	1	TAGGCCCGGATTGCC
539	mamo-L	BGIBMGA001110	down	517	531	+	11.0887	6.01e-05	1	TAGGCTTATTTCAAT
540	mamo-L	BGIBMGA001112	up	852	866	-	10.9194	6.98e-05	1	TAGGCGGGCTTCGAA
541	mamo-L	BGIBMGA001113	down	13	27	-	10.7581	8e-05	1	AAGGCTTTTTTTATT
542	mamo-L	BGIBMGA001116	up	618	632	-	11.0323	6.32e-05	1	TAGGCTGGGAGGTGT
543	mamo-L	BGIBMGA001116	down	433	447	+	10.9839	6.59e-05	1	TAGGCATTATTTTGT
544	mamo-L	BGIBMGA001116	down	25	39	-	10.9032	7.07e-05	1	TAGGCCTTATTTCAT
545	mamo-L	BGIBMGA001117	down	280	294	+	12.0565	2.36e-05	1	TAGGCTGTCTATGGG
546	mamo-L	BGIBMGA001117	down	27	41	+	11.3468	4.73e-05	1	TAGGCGAAATTTTGT
547	mamo-L	BGIBMGA001118	down	640	654	-	10.5081	9.83e-05	1	TAGGCCAGTTTTAAT
548	mamo-L	BGIBMGA001124	down	609	623	-	12.0161	2.46e-05	1	TAGGCTGGTTATTTC
549	mamo-L	BGIBMGA001124	down	1268	1282	+	11.8548	2.89e-05	1	TAGGCTGGGGTGGTG
550	mamo-L	BGIBMGA001133	down	1519	1533	-	11.3306	4.8e-05	1	AAGGCCGTCTTTACT
551	mamo-L	BGIBMGA001133	up	151	165	+	10.5403	9.58e-05	1	TAGGCTTTATTGGGA
552	mamo-L	BGIBMGA001134	down	340	354	-	11.3306	4.8e-05	1	AAGGCCGTCTTTACT
553	mamo-L	BGIBMGA001137	up	1537	1551	+	10.5403	9.58e-05	1	TAGGCTGTATGGTGT
554	mamo-L	BGIBMGA001138	up	1606	1620	+	11.3548	4.69e-05	1	AAGGCTGATGATGAT
555	mamo-L	BGIBMGA001141	down	1633	1647	+	11.6935	3.39e-05	1	TAGGCGTGTTTGTTT
556	mamo-L	BGIBMGA001142	up	1512	1526	+	10.9032	7.07e-05	1	TAGGCTCTATTCTTT
557	mamo-L	BGIBMGA001145	up	519	533	-	11.0323	6.32e-05	1	TAGGCTTACGACCCT
558	mamo-L	BGIBMGA001145	up	950	964	-	10.9194	6.98e-05	1	TAGGCTACTTTTTTT
559	mamo-L	BGIBMGA001145	down	1338	1352	-	10.5726	9.33e-05	1	TAGGCTAATATTTAT
560	mamo-L	BGIBMGA001147	down	1804	1818	+	11.1371	5.75e-05	1	AAGGCTGCTGTTTGT
561	mamo-L	BGIBMGA001149	up	1395	1409	+	13.8387	2.54e-06	1	TAGGCTAGTTTTGGT
562	mamo-L	BGIBMGA001150	up	1287	1301	+	13.2742	5.7e-06	1	TAGGCGTAGGTTTAT
563	mamo-L	BGIBMGA001150	up	781	795	-	10.75	8.06e-05	1	GAGGCCGATTGTGCC
564	mamo-L	BGIBMGA001151	up	711	725	+	13.0565	7.51e-06	1	TAGGCTTACTACGCT
565	mamo-L	BGIBMGA001152	down	546	560	-	10.8871	7.17e-05	1	TAGGCATTTTTGGCT
566	mamo-L	BGIBMGA001154	down	353	367	-	12.9919	8.1e-06	1	TAGGCCGGTTTTGCA
567	mamo-L	BGIBMGA001154	up	1329	1343	+	10.9839	6.59e-05	1	AAGGCCATTTTTGTT
568	mamo-L	BGIBMGA001155	up	1203	1217	+	11.5323	3.96e-05	1	TAGGCGTGAGGTGAT
569	mamo-L	BGIBMGA001156	up	1177	1191	+	12.0645	2.34e-05	1	TAGGCGGGCTTCGGA
570	mamo-L	BGIBMGA001160	down	1136	1150	-	10.5726	9.33e-05	1	TAGGCTAATATTTAT
571	mamo-L	BGIBMGA001162	up	621	635	+	10.9194	6.98e-05	1	TAGGCTACTTTTTTT
572	mamo-L	BGIBMGA001164	up	1210	1224	+	11.1935	5.45e-05	1	AAGGCCGTGATTTCT
573	mamo-L	BGIBMGA001168	down	465	479	-	11	6.5e-05	1	TAGGCATATTTTGGA
574	mamo-L	BGIBMGA001177	down	1181	1195	-	11.121	5.84e-05	1	TAGGCTTAGTTGTGA
575	mamo-L	BGIBMGA001179	up	907	921	-	10.9194	6.98e-05	1	TAGGCTACTTTTTTT
576	mamo-L	BGIBMGA001181	down	925	939	-	10.8226	7.58e-05	1	AAGGCTGGTTTGGAT
577	mamo-L	BGIBMGA001185	up	1539	1553	-	10.9194	6.98e-05	1	TAGGCTACTTTTTTT
578	mamo-L	BGIBMGA001188	up	1415	1429	+	14	1.98e-06	1	TAGGCTGCTGTTGCT
579	mamo-L	BGIBMGA001188	down	1054	1068	+	13.0887	7.18e-06	1	TAGGCTTGAGATGCT
580	mamo-L	BGIBMGA001191	down	1231	1245	+	11.6532	3.53e-05	1	AAGGCTTTTATTGTT
581	mamo-L	BGIBMGA001201	up	38	52	+	11.3065	4.91e-05	1	TAGGCTGACGAGCGT
582	mamo-L	BGIBMGA001201	up	1168	1182	+	11.1774	5.54e-05	1	TGGGCCGAGTTTTTT
583	mamo-L	BGIBMGA001202	down	1034	1048	+	10.9194	6.98e-05	1	AAGGCGCGCTTTTTT
584	mamo-L	BGIBMGA001204	down	460	474	-	12.7742	1.04e-05	1	TAGGCCTCGGTGGGT
585	mamo-L	BGIBMGA001204	up	180	194	-	11.5323	3.96e-05	1	TAGGCTAATGTTGTA
586	mamo-L	BGIBMGA001204	up	1524	1538	-	10.7742	7.89e-05	1	TAGGCTCGATTGTTT
587	mamo-L	BGIBMGA001205	down	1768	1782	-	10.6048	9.09e-05	1	TAGGCGCACAGTTTT
588	mamo-L	BGIBMGA001206	up	1766	1780	+	11.0806	6.05e-05	1	GAGGCTTTGATTTTT
589	mamo-L	BGIBMGA001209	up	1290	1304	+	12.3952	1.63e-05	1	AAGGCCGAATTTGTT
590	mamo-L	BGIBMGA001209	up	1271	1285	+	11.1774	5.54e-05	1	AAGGCCGGAATTGCT
591	mamo-L	BGIBMGA001211	down	883	897	+	11	6.5e-05	1	AAGGCTAGGGTTTTT
592	mamo-L	BGIBMGA001212	down	275	289	-	13.9113	2.26e-06	1	TAGGCCTATTTTTTT
593	mamo-L	BGIBMGA001212	up	651	665	+	11	6.5e-05	1	AAGGCTAGGGTTTTT
594	mamo-L	BGIBMGA001215	down	1168	1182	-	10.9839	6.59e-05	1	TAGGCGTGGATTTAC
595	mamo-L	BGIBMGA001217	up	1636	1650	+	11.8952	2.79e-05	1	TAGGCTGTGTGGTGT
596	mamo-L	BGIBMGA001218	down	32	46	-	10.75	8.06e-05	1	AAGGCGGGTGTTATT
597	mamo-L	BGIBMGA001219	up	1724	1738	+	12.4355	1.55e-05	1	TAGGCTCACTATTCT
598	mamo-L	BGIBMGA001224	down	1474	1488	+	12.8226	9.86e-06	1	TAGGCTTCCTTCGTT
599	mamo-L	BGIBMGA001226	down	114	128	-	12.121	2.2e-05	1	TAGGCAGACGTTAGT
600	mamo-L	BGIBMGA001231	down	1367	1381	-	10.5968	9.15e-05	1	TAGGCTTAATTGCTT
601	mamo-L	BGIBMGA001232	down	608	622	+	12.2419	1.94e-05	1	TAGGCTCATTATGAT
602	mamo-L	BGIBMGA001233	up	289	303	-	12.5081	1.43e-05	1	TAGGCTTCTTTTTTT
603	mamo-L	BGIBMGA001234	down	807	821	+	11.7823	3.11e-05	1	TAGGCTGTGTAGGTC
604	mamo-L	BGIBMGA001235	down	890	904	+	13.0081	7.94e-06	1	TAGGCCTGCTGTGCC
605	mamo-L	BGIBMGA001236	down	340	354	-	11.3952	4.52e-05	1	TAGGCTTTATGCGTT
606	mamo-L	BGIBMGA001237	down	30	44	-	12.5081	1.43e-05	1	TAGGCCGGCGGCGGC
607	mamo-L	BGIBMGA001237	up	1021	1035	-	11.3952	4.52e-05	1	TAGGCTTTATGCGTT
608	mamo-L	BGIBMGA001240	down	973	987	-	12.3065	1.8e-05	1	TAGGCAGGATTTGTT
609	mamo-L	BGIBMGA001240	up	370	384	+	10.629	8.91e-05	1	TAGGCCGTGAGCTCT
610	mamo-L	BGIBMGA001242	down	1505	1519	+	11.1694	5.59e-05	1	AAGGCTTTAATTGGT
611	mamo-L	BGIBMGA001244	down	1005	1019	-	10.5887	9.21e-05	1	TAGGCGCATGACGGC
612	mamo-L	BGIBMGA001245	up	562	576	-	10.9435	6.83e-05	1	TAGGCTGTGATGACT
613	mamo-L	BGIBMGA001247	down	1862	1876	+	12.0645	2.34e-05	1	TAGGCGGGCTTCGGA
614	mamo-L	BGIBMGA001247	up	1055	1069	+	11.2016	5.41e-05	1	TAGGCTTAAGATATT
615	mamo-L	BGIBMGA001248	up	1273	1287	+	11.7903	3.08e-05	1	TAGGCTTCGTTCTTT
616	mamo-L	BGIBMGA001249	down	1418	1432	-	13.5887	3.68e-06	1	TAGGCCTTTTTTTTT
617	mamo-L	BGIBMGA001253	up	46	60	-	11.6452	3.56e-05	1	TAGGCCTTGGTTTCG
618	mamo-L	BGIBMGA001253	up	169	183	+	10.6855	8.51e-05	1	TAGGCCGGTAGTACT
619	mamo-L	BGIBMGA001256	down	1695	1709	-	12.9919	8.1e-06	1	TAGGCCGGTTTTGCA
620	mamo-L	BGIBMGA001256	down	427	441	+	10.9032	7.07e-05	1	AAGGCGTAGTTCTGT
621	mamo-L	BGIBMGA001256	down	1847	1861	+	10.8629	7.33e-05	1	TAGGCCATTTTTGCA
622	mamo-L	BGIBMGA001257	down	1339	1353	-	11.4597	4.25e-05	1	TAGGCGGGGTGGTGT
623	mamo-L	BGIBMGA001257	down	1718	1732	+	10.5	9.9e-05	1	GAGGCCCAGGTCGTC
624	mamo-L	BGIBMGA001258	up	103	117	-	11.4597	4.25e-05	1	TAGGCGGGGTGGTGT
625	mamo-L	BGIBMGA001258	up	482	496	+	10.5	9.9e-05	1	GAGGCCCAGGTCGTC
626	mamo-L	BGIBMGA001262	down	829	843	-	12.9435	8.54e-06	1	TAGGCTTTTTTTTAT
627	mamo-L	BGIBMGA001262	up	1506	1520	+	11.7581	3.18e-05	1	TAGGCTAAGTTCTCT
628	mamo-L	BGIBMGA001266	up	294	308	-	14.7177	5.94e-07	1	TAGGCTTACGTTTTT
629	mamo-L	BGIBMGA001267	down	801	815	-	10.5726	9.33e-05	1	TAGGCTAATATTTAT
630	mamo-L	BGIBMGA001274	down	681	695	+	11.8065	3.03e-05	1	TAGGCTGACGATCAT
631	mamo-L	BGIBMGA001277	down	480	494	+	10.75	8.06e-05	1	GAGGCCGATTGTGCC
632	mamo-L	BGIBMGA001283	down	285	299	-	11.4274	4.38e-05	1	TAGGCATTTATTGCT
633	mamo-L	BGIBMGA001283	down	1835	1849	-	11.2742	5.06e-05	1	AAGGCTTTCGTCGAT
634	mamo-L	BGIBMGA001284	up	1496	1510	+	11.4516	4.28e-05	1	TAGGCTTCTTTTCTT
635	mamo-L	BGIBMGA001284	down	1386	1400	-	10.75	8.06e-05	1	GAGGCCGATTGTGCC
636	mamo-L	BGIBMGA001284	up	1798	1812	+	10.5726	9.33e-05	1	TAGGCTTCATGTGAT
637	mamo-L	BGIBMGA001284	down	273	287	-	10.5565	9.46e-05	1	TAGGCTTATCATTGT
638	mamo-L	BGIBMGA001286	up	1523	1537	+	14.2339	1.38e-06	1	TAGGCTTTCTTTTCT
639	mamo-L	BGIBMGA001290	up	1462	1476	-	13.129	6.83e-06	1	TAGGCTTTCATTTCT
640	mamo-L	BGIBMGA001290	down	800	814	-	12.2984	1.81e-05	1	TAGGCCTGTTTTGCG
641	mamo-L	BGIBMGA001293	down	102	116	-	10.5968	9.15e-05	1	GAGGCTAGTTTTTGT
642	mamo-L	BGIBMGA001294	up	586	600	-	10.5968	9.15e-05	1	GAGGCTAGTTTTTGT
643	mamo-L	BGIBMGA001295	down	1235	1249	-	11.0887	6.01e-05	1	AAGGCTTAGGGCGTT
644	mamo-L	BGIBMGA001297	down	1762	1776	+	13.1048	7.05e-06	1	TAGGCTCTTGTTTTT
645	mamo-L	BGIBMGA001298	up	855	869	+	13.2823	5.66e-06	1	TAGGCTGTTTTTGGA
646	mamo-L	BGIBMGA001298	down	1328	1342	+	10.75	8.06e-05	1	GAGGCCGATTGTGCC
647	mamo-L	BGIBMGA001302	down	1526	1540	-	11.4516	4.28e-05	1	TAGGCTTGCGTCACC
648	mamo-L	BGIBMGA001303	up	880	894	-	12.7258	1.11e-05	1	TAGGCGTGCTTTGTA
649	mamo-L	BGIBMGA001304	up	1979	1993	-	11.3548	4.69e-05	1	TCGGCTGTCTTTGCT
650	mamo-L	BGIBMGA001305	up	1752	1766	-	11.3629	4.66e-05	1	TAGGCTTAATTTGAA
651	mamo-L	BGIBMGA001306	down	656	670	-	13.1048	7.05e-06	1	TAGGCTGACGATAGT
652	mamo-L	BGIBMGA001306	up	1929	1943	-	11.0726	6.09e-05	1	TAGGCGGCCGTGTCT
653	mamo-L	BGIBMGA001310	up	1489	1503	-	10.9919	6.55e-05	1	AAGGCTAGGTTTGTC
654	mamo-L	BGIBMGA001310	up	1633	1647	-	10.7984	7.74e-05	1	AAGGCTTGTATTTTT
655	mamo-L	BGIBMGA001318	up	1193	1207	+	11.0403	6.28e-05	1	TAGGCCTACAATACT
656	mamo-L	BGIBMGA001320	up	1006	1020	+	12.121	2.2e-05	1	TAGGCTTTGATTGTA
657	mamo-L	BGIBMGA001321	up	834	848	+	10.9919	6.55e-05	1	AAGGCTAGGTTTGTC
658	mamo-L	BGIBMGA001321	up	690	704	+	10.7984	7.74e-05	1	AAGGCTTGTATTTTT
659	mamo-L	BGIBMGA001325	up	941	955	-	12.7258	1.11e-05	1	AAGGCTTGGTTTGAT
660	mamo-L	BGIBMGA001325	up	1221	1235	+	10.8145	7.63e-05	1	TAGGCTTGCAGCGCC
661	mamo-L	BGIBMGA001335	down	406	420	+	11.8065	3.03e-05	1	TAGGCTGACGTCGAA
662	mamo-L	BGIBMGA001335	down	1079	1093	-	11.3387	4.77e-05	1	TAGGCTGCTCTTGCT
663	mamo-L	BGIBMGA001336	up	1395	1409	-	10.6371	8.85e-05	1	TAGGCACTTTTTTCT
664	mamo-L	BGIBMGA001337	up	1008	1022	-	10.5968	9.15e-05	1	GAGGCTAGTTTTTGT
665	mamo-L	BGIBMGA001338	down	1590	1604	-	10.4919	9.96e-05	1	TAGGCTGTGTCTGTG
666	mamo-L	BGIBMGA001340	up	734	748	+	12.2016	2.03e-05	1	TAGGCTCCCTTTTTT
667	mamo-L	BGIBMGA001345	down	1063	1077	+	11.2742	5.06e-05	1	TAGGCGGCGGCTGTT
668	mamo-L	BGIBMGA001345	up	461	475	-	10.9194	6.98e-05	1	TAGGCTACTTTTTTT
669	mamo-L	BGIBMGA001347	down	817	831	-	10.9194	6.98e-05	1	TAGGCTACTTTTTTT
670	mamo-L	BGIBMGA001347	up	1145	1159	+	10.6694	8.62e-05	1	TAGGCGTATTTGGTA
671	mamo-L	BGIBMGA001353	up	1416	1430	+	10.9839	6.59e-05	1	GAGGCTGTCGTTAGC
672	mamo-L	BGIBMGA001355	down	51	65	+	11.9113	2.74e-05	1	AAGGCTTTGTGTGTT
673	mamo-L	BGIBMGA001356	up	309	323	+	11.2984	4.95e-05	1	AAGGCGTATATTGTT
674	mamo-L	BGIBMGA001357	up	1248	1262	-	11.4677	4.22e-05	1	TAGGCTGATGATAAT
675	mamo-L	BGIBMGA001361	down	1086	1100	+	11.3548	4.69e-05	1	AAGGCTGATGATGAT
676	mamo-L	BGIBMGA001361	down	1804	1818	-	10.5081	9.83e-05	1	TAGGCGGGGTGTTGG
677	mamo-L	BGIBMGA001365	down	782	796	-	11.1935	5.45e-05	1	TAGGCGCATGAGGGT
678	mamo-L	BGIBMGA001369	up	64	78	+	13.1935	6.33e-06	1	TAGGCTTTAGATGGT
679	mamo-L	BGIBMGA001370	up	945	959	-	10.621	8.97e-05	1	AAGGCGGGTTTTATT
680	mamo-L	BGIBMGA001372	up	46	60	+	10.5968	9.15e-05	1	AAGGCTTGGGGTAGT
681	mamo-L	BGIBMGA001376	up	1759	1773	+	10.8226	7.58e-05	1	AAGGCTCTTATTGCT
682	mamo-L	BGIBMGA001377	down	1495	1509	+	11.2903	4.99e-05	1	TAGGCGCGGTTTTAC
683	mamo-L	BGIBMGA001379	down	1918	1932	-	11.1935	5.45e-05	1	AAGGCTGAGTTGTTT
684	mamo-L	BGIBMGA001381	down	911	925	-	11.2742	5.06e-05	1	TAGGCGGCGGCTGTT
685	mamo-L	BGIBMGA001386	down	115	129	+	13.3871	4.9e-06	1	TAGGCTTAATATGGT
686	mamo-L	BGIBMGA001392	down	1343	1357	-	11.1774	5.54e-05	1	AAGGCTGATTTTGTA
687	mamo-L	BGIBMGA001392	up	1425	1439	-	10.7419	8.11e-05	1	TCGGCTGACGTTTTT
688	mamo-L	BGIBMGA001394	down	387	401	-	11.5726	3.81e-05	1	TAGGCGTGGTCTTGT
689	mamo-L	BGIBMGA001398	down	1200	1214	-	12.7258	1.11e-05	1	TAGGCTTTGGTTAAT
690	mamo-L	BGIBMGA001399	down	1151	1165	+	11.7419	3.23e-05	1	TAGGCCTAAGACGTT
691	mamo-L	BGIBMGA001401	up	581	595	+	11.5323	3.96e-05	1	TAGGCGTGAGGTGAT
692	mamo-L	BGIBMGA001401	down	1644	1658	-	10.9194	6.98e-05	1	TAGGCTTAGCATGTC
693	mamo-L	BGIBMGA001406	down	1542	1556	-	12.5	1.44e-05	1	TAGGCTAATATTGTT
694	mamo-L	BGIBMGA001407	up	34	48	+	13.5565	3.86e-06	1	TAGGCTTGTGTTAGT
695	mamo-L	BGIBMGA001407	down	619	633	+	10.8145	7.63e-05	1	GAGGCTTCGGTGGGT
696	mamo-L	BGIBMGA001414	down	1747	1761	+	11.4597	4.25e-05	1	TAGGCGGCTATTGGC
697	mamo-L	BGIBMGA001415	up	42	56	+	12.3306	1.75e-05	1	TAGGCTTACTATACT
698	mamo-L	BGIBMGA001415	down	731	745	+	11.1935	5.45e-05	1	TAGGCCGTGGCTCGT
699	mamo-L	BGIBMGA001420	down	132	146	-	11.6129	3.66e-05	1	TAGGCTTTTAATGAT
700	mamo-L	BGIBMGA001423	down	141	155	+	13.6613	3.32e-06	1	TAGGCTCGTGTTTGT
701	mamo-L	BGIBMGA001428	down	395	409	+	11.121	5.84e-05	1	TAGGCTGAATTGTAT
702	mamo-L	BGIBMGA001429	down	249	263	+	11.5323	3.96e-05	1	TAGGCGGGATTCTCT
703	mamo-L	BGIBMGA001433	down	853	867	-	10.5726	9.33e-05	1	TAGGCTAATATTTAT
704	mamo-L	BGIBMGA001435	up	597	611	-	10.8629	7.33e-05	1	TAGGCTGTCTAAGTT
705	mamo-L	BGIBMGA001437	up	1802	1816	-	11.9194	2.72e-05	1	TAGGCTTCTTTTAGT
706	mamo-L	BGIBMGA001438	down	108	122	+	13.2823	5.66e-06	1	TAGGCTGTCATCGTT
707	mamo-L	BGIBMGA001439	up	1094	1108	+	12.4677	1.49e-05	1	TAGGCTTACGTCTTC
708	mamo-L	BGIBMGA001439	up	448	462	-	11.2177	5.34e-05	1	TAGGCCGATTTCCGC
709	mamo-L	BGIBMGA001440	up	81	95	+	11.7661	3.16e-05	1	TAGGCAGTTTTTTTT
710	mamo-L	BGIBMGA001440	down	743	757	+	10.8871	7.17e-05	1	AAGGCTGTTGATGTC
711	mamo-L	BGIBMGA001440	up	1949	1963	+	10.5726	9.33e-05	1	AAGGCCTACTTTCGC
712	mamo-L	BGIBMGA001441	up	517	531	-	10.6371	8.85e-05	1	TAGGCTTTTTTTACA
713	mamo-L	BGIBMGA001444	up	1033	1047	-	12.2258	1.97e-05	1	AAGGCTGTTTTTGAT
714	mamo-L	BGIBMGA001446	down	1290	1304	+	12.7581	1.07e-05	1	TAGGCTGTCTTTTAC
715	mamo-L	BGIBMGA001446	down	153	167	-	11.6129	3.66e-05	1	TAGGCTTTTAATGAT
716	mamo-L	BGIBMGA001451	down	36	50	+	13.3306	5.3e-06	1	TAGGCTTAGTATTTT
717	mamo-L	BGIBMGA001451	down	389	403	+	10.7258	8.23e-05	1	TAGGCTTTGTGTTTA
718	mamo-L	BGIBMGA001453	up	649	663	+	10.8387	7.47e-05	1	TAGGCTTATTATGAA
719	mamo-L	BGIBMGA001463	up	1684	1698	+	10.7984	7.74e-05	1	TAGGCTGTATTGTAT
720	mamo-L	BGIBMGA001465	up	886	900	-	10.9194	6.98e-05	1	TAGGCTACTTTTTTT
721	mamo-L	BGIBMGA001471	up	651	665	+	10.7823	7.84e-05	1	TAGGCGGTGAGTTGC
722	mamo-L	BGIBMGA001474	up	780	794	-	13.3145	5.41e-06	1	TAGGCGTTGTGTGCT
723	mamo-L	BGIBMGA001478	down	1433	1447	-	12.6129	1.26e-05	1	TAGGCCTTTTTTTTC
724	mamo-L	BGIBMGA001480	up	889	903	-	13.4677	4.39e-06	1	TAGGCTGATGATGAT
725	mamo-L	BGIBMGA001481	up	1823	1837	+	11.1774	5.54e-05	1	TAGGCTTAGTTCTTA
726	mamo-L	BGIBMGA001482	down	11	25	-	11.621	3.63e-05	1	TAGGCCTTGGAGTGT
727	mamo-L	BGIBMGA001482	down	18	32	+	10.6452	8.79e-05	1	AAGGCCTACTTGTTT
728	mamo-L	BGIBMGA001484	down	444	458	-	10.4919	9.96e-05	1	TAGGCTTAGAATAAT
729	mamo-L	BGIBMGA001488	down	862	876	+	11.8387	2.94e-05	1	TAGGCTATGTTTATT
730	mamo-L	BGIBMGA001490	up	625	639	-	12.6935	1.15e-05	1	TAGGCTGTATTGGCT
731	mamo-L	BGIBMGA001490	down	1203	1217	+	11.621	3.63e-05	1	TAGGCCTTGGAGTGT
732	mamo-L	BGIBMGA001490	down	1196	1210	-	10.6452	8.79e-05	1	AAGGCCTACTTGTTT
733	mamo-L	BGIBMGA001491	up	1242	1256	+	12.879	9.26e-06	1	TAGGCCTCGTTTTTT
734	mamo-L	BGIBMGA001493	up	1282	1296	+	13.4677	4.39e-06	1	TAGGCTGATGATGAT
735	mamo-L	BGIBMGA001495	down	1010	1024	-	11.629	3.61e-05	1	TAGGCCTATGGCGAT
736	mamo-L	BGIBMGA001497	up	1196	1210	+	13.3065	5.48e-06	1	GAGGCGTACGTTGGT
737	mamo-L	BGIBMGA001499	down	1876	1890	-	10.5968	9.15e-05	1	GAGGCTAGTTTTTGT
738	mamo-L	BGIBMGA001500	down	89	103	-	10.629	8.91e-05	1	TAGGCCTGCAGCGCC
739	mamo-L	BGIBMGA001501	down	1129	1143	-	11.3145	4.87e-05	1	TAGGCTTAGGCTTAT
740	mamo-L	BGIBMGA001503	up	1103	1117	-	11.4274	4.38e-05	1	AAGGCCGAGGATTCT
741	mamo-L	BGIBMGA001504	down	1353	1367	+	11.2984	4.95e-05	1	TAGGCTACGGGTGTT
742	mamo-L	BGIBMGA001509	up	1333	1347	-	12.7258	1.11e-05	1	TAGGCCTAGGAGGTT
743	mamo-L	BGIBMGA001509	up	931	945	-	12.0887	2.29e-05	1	GAGGCTTATGGTGGT
744	mamo-L	BGIBMGA001509	up	1340	1354	+	11.8387	2.94e-05	1	TAGGCCTATGCTGGC
745	mamo-L	BGIBMGA001511	up	339	353	-	11.7984	3.06e-05	1	GAGGCTGAGGTTGCA
746	mamo-L	BGIBMGA001513	up	872	886	+	11.0323	6.32e-05	1	TAGGCAGACGTGTCT
747	mamo-L	BGIBMGA001513	up	1665	1679	-	10.5726	9.33e-05	1	TAGGCTAATATTTAT
748	mamo-L	BGIBMGA001514	down	1789	1803	+	10.5161	9.77e-05	1	TAGGCTTTTTTTCTA
749	mamo-L	BGIBMGA001521	down	646	660	+	11.1048	5.92e-05	1	TAGGCAGGTTTTATT
750	mamo-L	BGIBMGA001522	down	1864	1878	+	12.1774	2.08e-05	1	TAGGCTTGCACTGGT
751	mamo-L	BGIBMGA001525	down	1813	1827	-	12.7581	1.07e-05	1	TAGGCTGTCTTTTAC
752	mamo-L	BGIBMGA001532	up	879	893	-	11.25	5.18e-05	1	TAGGCCCATTTCAGT
753	mamo-L	BGIBMGA001535	down	198	212	+	11.2177	5.34e-05	1	TAGGCCGATTTCCGC
754	mamo-L	BGIBMGA001535	down	708	722	+	10.8145	7.63e-05	1	TGGGCGCAGGTTGTT
755	mamo-L	BGIBMGA001536	down	1673	1687	+	11.9194	2.72e-05	1	TAGGCTTCTTTTAGT
756	mamo-L	BGIBMGA001537	up	1074	1088	+	11.9194	2.72e-05	1	TAGGCTTCTTTTAGT
757	mamo-L	BGIBMGA001538	up	1186	1200	+	12.9355	8.65e-06	1	TAGGCTGTATGTGCT
758	mamo-L	BGIBMGA001541	down	519	533	-	12.5242	1.4e-05	1	TAGGCCCATTTTAGT
759	mamo-L	BGIBMGA001547	down	951	965	-	11.121	5.84e-05	1	TAGGCTGAATTGTAT
760	mamo-L	BGIBMGA001548	down	1457	1471	-	11.7016	3.37e-05	1	TAGGCAGACGATTGT
761	mamo-L	BGIBMGA001548	down	59	73	+	11.4758	4.18e-05	1	TAGGCTTAGTTGGCG
762	mamo-L	BGIBMGA001551	down	1082	1096	+	11.6774	3.44e-05	1	GAGGCTTAGTTTTAT
763	mamo-L	BGIBMGA001555	down	278	292	+	11.0968	5.97e-05	1	GAGGCCGATTGTGGC
764	mamo-L	BGIBMGA001560	down	1413	1427	+	11.0726	6.09e-05	1	TAGGCTTGTTTTCGA
765	mamo-L	BGIBMGA001561	up	1341	1355	+	11.5323	3.96e-05	1	TAGGCGTGAGGTGAT
766	mamo-L	BGIBMGA001562	down	570	584	+	12.4516	1.53e-05	1	TGGGCTGTGTTTGGT
767	mamo-L	BGIBMGA001563	up	886	900	+	11.5726	3.81e-05	1	TAGGCGGGTTTCGGA
768	mamo-L	BGIBMGA001565	down	219	233	-	11.4597	4.25e-05	1	TAGGCGGCTATTGGC
769	mamo-L	BGIBMGA001568	up	1070	1084	+	10.5	9.9e-05	1	GAGGCCCAGGTCGTC
770	mamo-L	BGIBMGA001570	down	1882	1896	+	11.5968	3.73e-05	1	GAGGCTTTTTTTTCT
771	mamo-L	BGIBMGA001571	down	1958	1972	+	10.5726	9.33e-05	1	TAGGCTAATATTTAT
772	mamo-L	BGIBMGA001573	up	567	581	-	11.2742	5.06e-05	1	AAGGCCGGTTTTCGT
773	mamo-L	BGIBMGA001574	down	1761	1775	-	10.9839	6.59e-05	1	TAGGCAGTGATGGGT
774	mamo-L	BGIBMGA001578	up	497	511	+	10.7823	7.84e-05	1	TAGGCTGGATGGTGT
775	mamo-L	BGIBMGA001580	up	1805	1819	+	12.3952	1.63e-05	1	AAGGCGGGGTTTTGT
776	mamo-L	BGIBMGA001581	down	965	979	+	11.9274	2.69e-05	1	TAGGCCACTGTTGCT
777	mamo-L	BGIBMGA001583	up	1144	1158	-	10.5726	9.33e-05	1	TAGGCTAATATTTAT
778	mamo-L	BGIBMGA001586	up	41	55	+	12.0645	2.34e-05	1	TAGGCGGGCTTCGGA
779	mamo-L	BGIBMGA001588	up	1961	1975	-	10.5726	9.33e-05	1	TAGGCTAATATTTAT
780	mamo-L	BGIBMGA001596	down	1458	1472	-	10.7258	8.23e-05	1	TAGGCTGGGATAGGC
781	mamo-L	BGIBMGA001598	down	353	367	+	12.8387	9.67e-06	1	TAGGCTCGGTTTACT
782	mamo-L	BGIBMGA001607	up	755	769	+	11.0323	6.32e-05	1	TAGGCGGTATTTAGC
783	mamo-L	BGIBMGA001607	up	1767	1781	+	10.9194	6.98e-05	1	TAGGCTACTTTTTTT
784	mamo-L	BGIBMGA001608	up	606	620	+	10.7258	8.23e-05	1	TAGGCTTCTGTTACC
785	mamo-L	BGIBMGA001612	down	1319	1333	-	10.8871	7.17e-05	1	TAGGCTAGGCTTGGC
786	mamo-L	BGIBMGA001613	down	645	659	+	12.0565	2.36e-05	1	AAGGCTCTTGTTGCT
787	mamo-L	BGIBMGA001614	up	1759	1773	+	12.0565	2.36e-05	1	AAGGCTCTTGTTGCT
788	mamo-L	BGIBMGA001614	up	394	408	+	10.8306	7.52e-05	1	AAGGCCTCCGTTTTT
789	mamo-L	BGIBMGA001616	down	220	234	-	11.6855	3.42e-05	1	TAGGCGGAGTGTGGG
790	mamo-L	BGIBMGA001616	down	1611	1625	-	10.8306	7.52e-05	1	AAGGCTTTATTTTCT
791	mamo-L	BGIBMGA001618	up	418	432	-	12.0887	2.29e-05	1	TAGGCAGATTTTTTT
792	mamo-L	BGIBMGA001619	up	428	442	-	11	6.5e-05	1	TAGGCATGCGTGTGT
793	mamo-L	BGIBMGA001620	up	750	764	-	10.75	8.06e-05	1	GAGGCCGATTGTGCC
794	mamo-L	BGIBMGA001621	up	1437	1451	+	11.2339	5.26e-05	1	TAGGCAGGGTTGTGT
795	mamo-L	BGIBMGA001625	down	699	713	+	10.8387	7.47e-05	1	TAGGCGGACCTCGGC
796	mamo-L	BGIBMGA001628	down	636	650	-	12.5323	1.39e-05	1	TAGGCCTAGTTCTGC
797	mamo-L	BGIBMGA001630	down	1958	1972	+	10.7984	7.74e-05	1	AAGGCGGTATTTTGT
798	mamo-L	BGIBMGA001634	down	1170	1184	+	10.7258	8.23e-05	1	TAGCCTTTTTTTGCT
799	mamo-L	BGIBMGA001634	up	1576	1590	+	10.5161	9.77e-05	1	TAGGCCTATGATTTA
800	mamo-L	BGIBMGA001635	down	1674	1688	-	12.1371	2.17e-05	1	GAGGCCGTTGTTGAT
801	mamo-L	BGIBMGA001636	up	1764	1778	-	12.1371	2.17e-05	1	GAGGCCGTTGTTGAT
802	mamo-L	BGIBMGA001637	down	1013	1027	+	11.1129	5.88e-05	1	AAGGCTTTGTTTGTA
803	mamo-L	BGIBMGA001639	up	348	362	-	11.3629	4.66e-05	1	TAGGCAGTGGGTTGT
804	mamo-L	BGIBMGA001641	up	516	530	-	11.4194	4.42e-05	1	TAGGCAGTCATTGAT
805	mamo-L	BGIBMGA001641	down	793	807	-	10.9274	6.92e-05	1	TAGGCCGGCAGCGCC
806	mamo-L	BGIBMGA001642	down	1076	1090	+	10.75	8.06e-05	1	TAGGCGTATATTAGC
807	mamo-L	BGIBMGA001654	up	58	72	+	12.7581	1.07e-05	1	TAGGCGGGGGTTAGC
808	mamo-L	BGIBMGA001655	down	264	278	+	10.9758	6.64e-05	1	AAGGCCGTATTTTTT
809	mamo-L	BGIBMGA001655	up	1256	1270	+	10.5726	9.33e-05	1	TAGGCTAATATTTAT
810	mamo-L	BGIBMGA001660	up	1858	1872	-	10.7984	7.74e-05	1	TAGGCACTTGTTTTT
811	mamo-L	BGIBMGA001661	down	493	507	+	13.1048	7.05e-06	1	TAGGCCGATATTTTT
812	mamo-L	BGIBMGA001662	up	1073	1087	+	13.1048	7.05e-06	1	TAGGCCGATATTTTT
813	mamo-L	BGIBMGA001662	down	564	578	+	12.2903	1.83e-05	1	TAGGCGTTGAATGCT
814	mamo-L	BGIBMGA001664	down	1230	1244	-	12.4597	1.51e-05	1	AAGGCTTGGTTTTTT
815	mamo-L	BGIBMGA001664	down	855	869	+	10.5726	9.33e-05	1	TAGGCTAATATTTAT
816	mamo-L	BGIBMGA001665	down	1697	1711	-	11.1048	5.92e-05	1	GAGGCCTGTTTGGCT
817	mamo-L	BGIBMGA001666	down	1335	1349	+	10.5565	9.46e-05	1	TAGGCGGGGTGGAGT
818	mamo-L	BGIBMGA001668	down	545	559	-	10.9677	6.68e-05	1	TAGGCAGTATTTTTT
819	mamo-L	BGIBMGA001674	down	581	595	-	11.0887	6.01e-05	1	AAGGCCTATGTCGGC
820	mamo-L	BGIBMGA001674	down	726	740	+	10.9758	6.64e-05	1	TAGGCTGTATATTTC
821	mamo-L	BGIBMGA001675	up	1339	1353	-	11.0887	6.01e-05	1	AAGGCCTATGTCGGC
822	mamo-L	BGIBMGA001675	up	1484	1498	+	10.9758	6.64e-05	1	TAGGCTGTATATTTC
823	mamo-L	BGIBMGA001678	up	1683	1697	+	12.3226	1.77e-05	1	TAGGCCAATTTTTTT
824	mamo-L	BGIBMGA001679	down	953	967	+	12.4032	1.61e-05	1	AAGGCGTATTTTGTT
825	mamo-L	BGIBMGA001688	down	229	243	+	12.6855	1.16e-05	1	TAGGCTTTTTGTTGT
826	mamo-L	BGIBMGA001688	up	760	774	-	11.2661	5.1e-05	1	TAGGCCAGTTTTTTC
827	mamo-L	BGIBMGA001688	up	925	939	+	10.5081	9.83e-05	1	AAGGCTCGCTTTCCT
828	mamo-L	BGIBMGA001693	up	1572	1586	-	12.7177	1.12e-05	1	TAGGCTTTTTATGAT
829	mamo-L	BGIBMGA001693	down	965	979	+	11.2258	5.3e-05	1	TAGGCCTTTTTCCCT
830	mamo-L	BGIBMGA001693	up	1587	1601	+	11.2258	5.3e-05	1	TAGGCTTTCATTGAA
831	mamo-L	BGIBMGA001695	up	1733	1747	+	11.3629	4.66e-05	1	TAGGCTTTTTTAGCT
832	mamo-L	BGIBMGA001696	up	787	801	+	10.5726	9.33e-05	1	TAGGCTAATATTTAT
833	mamo-L	BGIBMGA001698	down	1716	1730	-	11.4919	4.11e-05	1	TAGGCATACATTTGT
834	mamo-L	BGIBMGA001702	up	1698	1712	+	13.3548	5.14e-06	1	TAGGCAGTCTTTGTT
835	mamo-L	BGIBMGA001702	down	29	43	+	11.7823	3.11e-05	1	TAGGCTTGGCATGCT
836	mamo-L	BGIBMGA001704	up	1724	1738	-	10.4919	9.96e-05	1	TAGGCTGTGGTAGGA
837	mamo-L	BGIBMGA001706	up	775	789	-	11.6613	3.5e-05	1	AAGGCTTTTTTTTTT
838	mamo-L	BGIBMGA001709	up	1119	1133	+	12.5726	1.33e-05	1	TAGGCAGGGTGTGGT
839	mamo-L	BGIBMGA001713	up	499	513	-	11.4355	4.34e-05	1	AAGGCTTATTTGGTT
840	mamo-L	BGIBMGA001717	down	1948	1962	-	10.7581	8e-05	1	AAGGCGTTTTATGTT
841	mamo-L	BGIBMGA001718	up	1931	1945	-	10.7581	8e-05	1	AAGGCGTTTTATGTT
842	mamo-L	BGIBMGA001720	down	895	909	+	13.5403	3.97e-06	1	TAGGCTGTATTTGAT
843	mamo-L	BGIBMGA001720	down	987	1001	+	11.1129	5.88e-05	1	TAGGCCTTGTTTTAA
844	mamo-L	BGIBMGA001722	down	665	679	-	11.4113	4.45e-05	1	TAGGCTACCTTTTTT
845	mamo-L	BGIBMGA001724	up	1177	1191	-	13.3548	5.14e-06	1	TAGGCAGTCTTTGTT
846	mamo-L	BGIBMGA001724	up	492	506	-	11.7823	3.11e-05	1	TAGGCTTGGCATGCT
847	mamo-L	BGIBMGA001727	down	1529	1543	-	11.129	5.79e-05	1	TAGGCTGGTGGTACC
848	mamo-L	BGIBMGA001728	up	1459	1473	-	10.5726	9.33e-05	1	TAGGCTAATATTTAT
849	mamo-L	BGIBMGA001729	up	293	307	-	10.5726	9.33e-05	1	TAGGCTAATATTTAT
850	mamo-L	BGIBMGA001731	down	1228	1242	-	11.2258	5.3e-05	1	TAGGCCTTTTTCCCT
851	mamo-L	BGIBMGA001733	up	155	169	+	11.5242	3.99e-05	1	TAGGCTATTTTTTGC
852	mamo-L	BGIBMGA001733	up	372	386	+	11.2258	5.3e-05	1	TAGGCCTTTTTCCCT
853	mamo-L	BGIBMGA001734	down	512	526	+	10.8306	7.52e-05	1	AAGGCTTTCTATTTT
854	mamo-L	BGIBMGA001736	down	1623	1637	+	10.9597	6.73e-05	1	TAGGCGCTTATGGGT
855	mamo-L	BGIBMGA001738	up	920	934	+	11.2661	5.1e-05	1	TAGGCCAGTTTTTTC
856	mamo-L	BGIBMGA001738	down	1061	1075	+	10.621	8.97e-05	1	TAGGCAGAAATTGGC
857	mamo-L	BGIBMGA001738	up	755	769	-	10.5081	9.83e-05	1	AAGGCTCGCTTTCCT
858	mamo-L	BGIBMGA001746	down	1021	1035	+	10.8952	7.12e-05	1	TAGGCTCTTGTCACT
859	mamo-L	BGIBMGA001746	down	1751	1765	+	10.629	8.91e-05	1	AAGGCCTTAGTCGTT
860	mamo-L	BGIBMGA001748	down	50	64	+	10.7984	7.74e-05	1	AAGGCGGAGAATGCT
861	mamo-L	BGIBMGA001761	down	937	951	+	11.5484	3.9e-05	1	TAGGCAGAGAGTGGT
862	mamo-L	BGIBMGA001763	down	1660	1674	-	11.3548	4.69e-05	1	TAGGCGGGGCGTGTT
863	mamo-L	BGIBMGA001770	down	1069	1083	-	12.2581	1.9e-05	1	TAGGCTTGTGTTTGA
864	mamo-L	BGIBMGA001771	up	1399	1413	-	12.2581	1.9e-05	1	TAGGCTTGTGTTTGA
865	mamo-L	BGIBMGA001771	down	1359	1373	-	10.9194	6.98e-05	1	TAGGCTACTTTTTTT
866	mamo-L	BGIBMGA001772	down	575	589	-	10.5565	9.46e-05	1	TAGGCGGGGTGGAGT
867	mamo-L	BGIBMGA001774	up	1559	1573	+	10.5968	9.15e-05	1	GAGGCTAGTTTTTGT
868	mamo-L	BGIBMGA001775	down	1815	1829	-	10.5726	9.33e-05	1	TAGGCTAATATTTAT
869	mamo-L	BGIBMGA001777	up	1362	1376	-	10.5806	9.27e-05	1	AAGGCTGAATTTATT
870	mamo-L	BGIBMGA001779	up	1564	1578	-	11.9597	2.61e-05	1	TAGGCGCATTTTTGC
871	mamo-L	BGIBMGA001783	up	1334	1348	+	10.8629	7.33e-05	1	GAGGCGTTCTTGGCT
872	mamo-L	BGIBMGA001784	up	1764	1778	-	11.5403	3.93e-05	1	TAGGCTTACTGGTTT
873	mamo-L	BGIBMGA001784	down	1575	1589	+	11.1613	5.63e-05	1	TAGGCGGACGTGGCG
874	mamo-L	BGIBMGA001785	down	1573	1587	-	12.7419	1.09e-05	1	TAGGCGGAGTTTGCG
875	mamo-L	BGIBMGA001785	up	336	350	+	11.1613	5.63e-05	1	TAGGCGGACGTGGCG
876	mamo-L	BGIBMGA001788	up	18	32	+	12.3629	1.69e-05	1	TAGGCTAAGGTTTAT
877	mamo-L	BGIBMGA001790	down	1708	1722	+	11.1129	5.88e-05	1	TAGGCGTTTTTCGAC
878	mamo-L	BGIBMGA001793	up	1381	1395	-	14.5806	7.86e-07	1	TAGGCTGTGGTCGTT
879	mamo-L	BGIBMGA001793	down	474	488	+	10.5806	9.27e-05	1	TAGGCTACCTTTTAT
880	mamo-L	BGIBMGA001794	up	77	91	+	10.5726	9.33e-05	1	TAGGCTAATATTTAT
881	mamo-L	BGIBMGA001797	down	586	600	+	12.5968	1.28e-05	1	AAGGCTTACTTTGTC
882	mamo-L	BGIBMGA001798	down	410	424	-	11.0403	6.28e-05	1	TAGGCTTAAATCGTC
883	mamo-L	BGIBMGA001806	down	174	188	+	12.0887	2.29e-05	1	TAGGCTTTCTTCATT
884	mamo-L	BGIBMGA001807	down	1454	1468	+	11.3145	4.87e-05	1	AAGGCTGTCTGTGAT
885	mamo-L	BGIBMGA001812	down	898	912	+	11.4194	4.42e-05	1	TAGGCCTTTGATTTC
886	mamo-L	BGIBMGA001814	up	1710	1724	+	12.2984	1.81e-05	1	TAGGCGCTTTTTTTT
887	mamo-L	BGIBMGA001814	down	1953	1967	-	10.7581	8e-05	1	TAGGCGGGAATTTTC
888	mamo-L	BGIBMGA001815	down	39	53	+	11.3952	4.52e-05	1	TAGGCGTTCATTCCT
889	mamo-L	BGIBMGA001816	down	1843	1857	+	11.5403	3.93e-05	1	TAGGCGGAGTGGTGT
890	mamo-L	BGIBMGA001818	up	1396	1410	+	12.871	9.35e-06	1	TAGGCTTTTTTTATT
891	mamo-L	BGIBMGA001818	down	1221	1235	+	11.3952	4.52e-05	1	GAGGCGTTTGTTTGT
892	mamo-L	BGIBMGA001819	up	524	538	+	13.6452	3.39e-06	1	TAGGCCGACGACGGT
893	mamo-L	BGIBMGA001822	down	1320	1334	+	11.2823	5.03e-05	1	AAGGCGGTTTTTTTT
894	mamo-L	BGIBMGA001824	up	585	599	-	11.1048	5.92e-05	1	TAGGCCGTGATTTCA
895	mamo-L	BGIBMGA001830	down	409	423	+	12.6371	1.23e-05	1	TAGGCGGAGTGGGGT
896	mamo-L	BGIBMGA001833	up	410	424	-	11.5887	3.75e-05	1	TAGGCTGACGACTAT
897	mamo-L	BGIBMGA001840	down	906	920	-	10.6371	8.85e-05	1	TAGGCATTTTTTTAT
898	mamo-L	BGIBMGA001840	up	1089	1103	+	10.5726	9.33e-05	1	TAGGCTAATATTTAT
899	mamo-L	BGIBMGA001843	down	1090	1104	-	10.5081	9.83e-05	1	TGGGCCTGTTTTGAT
900	mamo-L	BGIBMGA001845	up	1742	1756	+	11.1855	5.5e-05	1	TAGGCTGGGTGTTGG
901	mamo-L	BGIBMGA001845	down	229	243	-	10.7742	7.89e-05	1	AAGGCTCTCGTTGAC
902	mamo-L	BGIBMGA001850	down	1145	1159	+	12.7177	1.12e-05	1	TAGGCGTTGTTTACT
903	mamo-L	BGIBMGA001853	down	910	924	+	11.7339	3.26e-05	1	TAGGCTAATGTTATT
904	mamo-L	BGIBMGA001861	up	1407	1421	-	10.9274	6.92e-05	1	GAGGCTTTAGTTTCT
905	mamo-L	BGIBMGA001864	down	1978	1992	-	10.7661	7.95e-05	1	GAGGCGGTCGTTGTA
906	mamo-L	BGIBMGA001865	down	330	344	-	11.2177	5.34e-05	1	TAGGCGTCTGTTCGT
907	mamo-L	BGIBMGA001872	up	722	736	+	11.2903	4.99e-05	1	TAGGCTGTATGGGCT
908	mamo-L	BGIBMGA001874	down	1326	1340	-	11.3145	4.87e-05	1	TAGGCGGTGTCTTTT
909	mamo-L	BGIBMGA001875	up	978	992	-	12.9839	8.17e-06	1	TAGGCTTTTTTTGGA
910	mamo-L	BGIBMGA001876	up	158	172	+	11.3145	4.87e-05	1	TAGGCGGTCGAGGAT
911	mamo-L	BGIBMGA001877	up	1687	1701	-	11	6.5e-05	1	AAGGCCTAATTTTTT
912	mamo-L	BGIBMGA001878	up	1585	1599	-	10.7016	8.39e-05	1	TAGGCGCACTGTTCC
913	mamo-L	BGIBMGA001881	up	639	653	-	11.2258	5.3e-05	1	TAGGCCTTTTTCCCT
914	mamo-L	BGIBMGA001882	down	1684	1698	-	13.3629	5.09e-06	1	TAGGCTGCGTTTTTT
915	mamo-L	BGIBMGA001883	up	477	491	+	13.8548	2.48e-06	1	TAGGCCTACTTGGTT
916	mamo-L	BGIBMGA001887	down	702	716	+	10.5726	9.33e-05	1	TAGGCTAATATTTAT
917	mamo-L	BGIBMGA001891	up	282	296	-	10.8145	7.63e-05	1	TAGGCTGTTAATTAT
918	mamo-L	BGIBMGA001892	down	1545	1559	+	11.1129	5.88e-05	1	TAGGCTTTTAAGGGT
919	mamo-L	BGIBMGA001893	up	1625	1639	-	11.9597	2.61e-05	1	GAGGCCGTTGTTGCC
920	mamo-L	BGIBMGA001894	up	232	246	+	14.6855	6.44e-07	1	TAGGCGTTCTTTGTT
921	mamo-L	BGIBMGA001894	up	1678	1692	+	10.5403	9.58e-05	1	TAGGCTGTATGGTGT
922	mamo-L	BGIBMGA001896	up	1407	1421	-	10.9194	6.98e-05	1	TAGGCTACTTTTTTT
923	mamo-L	BGIBMGA001897	down	185	199	-	11.8065	3.03e-05	1	TAGGCTAATGTTTAT
924	mamo-L	BGIBMGA001898	down	1812	1826	+	10.9274	6.92e-05	1	TAGGCTCCCGGTTTT
925	mamo-L	BGIBMGA001900	down	286	300	+	13.0484	7.57e-06	1	TAGGCTGTATATGTT
926	mamo-L	BGIBMGA001901	down	690	704	-	12.9355	8.65e-06	1	GAGGCTGAGGTTTTT
927	mamo-L	BGIBMGA001901	up	587	601	-	10.8468	7.42e-05	1	TAGGCTATGATTGGA
928	mamo-L	BGIBMGA001902	up	341	355	-	11.0645	6.14e-05	1	TAGGCCCTAGATGAT
929	mamo-L	BGIBMGA001903	up	1921	1935	-	11.75	3.21e-05	1	TAGGCTGACATTCTC
930	mamo-L	BGIBMGA001907	up	1800	1814	-	11.25	5.18e-05	1	AAGGCTTACGATTCT
931	mamo-L	BGIBMGA001907	down	415	429	+	10.9194	6.98e-05	1	TAGGCTACTTTTTTT
932	mamo-L	BGIBMGA001907	up	182	196	-	10.5	9.9e-05	1	GAGGCCCAGGTCGTC
933	mamo-L	BGIBMGA001910	up	95	109	-	11.0242	6.36e-05	1	AAGGCCTTGTTTTCC
934	mamo-L	BGIBMGA001910	down	1714	1728	+	10.5968	9.15e-05	1	GAGGCTAGTTTTTGT
935	mamo-L	BGIBMGA001910	down	1940	1954	-	10.5806	9.27e-05	1	GAGGCTGAGGTGGAC
936	mamo-L	BGIBMGA001911	down	1232	1246	-	10.5726	9.33e-05	1	TAGGCGATTTTTACT
937	mamo-L	BGIBMGA001912	down	382	396	-	13.4113	4.75e-06	1	TAGGCCGAATTTTTT
938	mamo-L	BGIBMGA001912	down	688	702	-	10.9919	6.55e-05	1	TAGGCGTATTATGTA
939	mamo-L	BGIBMGA001917	up	351	365	+	10.5645	9.4e-05	1	AAGGCTTACTATAGT
940	mamo-L	BGIBMGA001918	down	1144	1158	-	12.5645	1.34e-05	1	TAGGCGGTTGTCTGT
941	mamo-L	BGIBMGA001918	up	27	41	+	11.75	3.21e-05	1	TAGGCTGACATTCTC
942	mamo-L	BGIBMGA001919	up	1749	1763	-	12.7258	1.11e-05	1	TAGGCGTGCTTTGTA
943	mamo-L	BGIBMGA001920	down	493	507	-	11.0403	6.28e-05	1	TAGGCCAGCATTAGT
944	mamo-L	BGIBMGA001923	down	1512	1526	+	10.7258	8.23e-05	1	GAGGCTTTTTTTATT
945	mamo-L	BGIBMGA001929	up	1068	1082	-	10.5403	9.58e-05	1	TAGGCTGTATGGTGT
946	mamo-L	BGIBMGA001930	up	1857	1871	+	10.5726	9.33e-05	1	TAGGCTAATATTTAT
947	mamo-L	BGIBMGA001931	down	773	787	+	11.6613	3.5e-05	1	GAGGCCTAGGTTGGA
948	mamo-L	BGIBMGA001933	up	1302	1316	+	12.7581	1.07e-05	1	TAGGCGTTTTGTGCT
949	mamo-L	BGIBMGA001933	up	83	97	+	11.1694	5.59e-05	1	TAGGCCGTCGACCGT
950	mamo-L	BGIBMGA001934	up	1166	1180	+	10.6694	8.62e-05	1	AAGGCGGGGAGTGTT
951	mamo-L	BGIBMGA001936	down	538	552	-	13.0565	7.51e-06	1	TAGGCGGGGGGCGGT
952	mamo-L	BGIBMGA001937	up	1511	1525	+	10.7097	8.33e-05	1	TAGGCCTGGTAGGAC
953	mamo-L	BGIBMGA001941	down	178	192	-	12.2581	1.9e-05	1	TAGGCTAGCTTTTGC
954	mamo-L	BGIBMGA001941	down	319	333	-	11.0242	6.36e-05	1	AAGGCTTATTTCTGT
955	mamo-L	BGIBMGA001949	up	859	873	-	11.2903	4.99e-05	1	TAGGCTGTATGGGCT
956	mamo-L	BGIBMGA001953	up	791	805	+	11.2419	5.21e-05	1	TAGGCATAGATTTTT
957	mamo-L	BGIBMGA001954	up	1085	1099	+	10.5726	9.33e-05	1	TAGGCTAATATTTAT
958	mamo-L	BGIBMGA001955	down	1217	1231	+	11.2177	5.34e-05	1	TAGGCGTCTGTTCGT
959	mamo-L	BGIBMGA001957	up	1893	1907	-	10.9355	6.88e-05	1	TAGGCCTCATTTAGT
960	mamo-L	BGIBMGA001958	down	442	456	-	10.9194	6.98e-05	1	TAGGCTACTTTTTTT
961	mamo-L	BGIBMGA001959	up	20	34	-	10.9194	6.98e-05	1	TAGGCTACTTTTTTT
962	mamo-L	BGIBMGA001963	up	615	629	-	10.5726	9.33e-05	1	TAGGCTAATATTTAT
963	mamo-L	BGIBMGA001964	down	1401	1415	+	10.9194	6.98e-05	1	TAGGCTACTTTTTTT
964	mamo-L	BGIBMGA001964	down	1617	1631	+	10.9194	6.98e-05	1	TAGGCTACTTTTTTT
965	mamo-L	BGIBMGA001964	down	1829	1843	+	10.9194	6.98e-05	1	TAGGCTACTTTTTTT
966	mamo-L	BGIBMGA001971	up	1191	1205	+	11.7661	3.16e-05	1	TAGGCAGTTTTTTTT
967	mamo-L	BGIBMGA001974	down	1642	1656	-	11.5726	3.81e-05	1	TAGGCTTAGGTAGAT
968	mamo-L	BGIBMGA001974	down	1556	1570	-	10.7258	8.23e-05	1	TAGGCAGACGATTGC
969	mamo-L	BGIBMGA001976	down	1605	1619	-	11.7823	3.11e-05	1	GAGGCTCACTTCGGT
970	mamo-L	BGIBMGA001977	down	1018	1032	-	11.3548	4.69e-05	1	AAGGCTGATGATGAT
971	mamo-L	BGIBMGA001977	down	1671	1685	-	10.4919	9.96e-05	1	TAGGCGTTTATTGTG
972	mamo-L	BGIBMGA001983	up	891	905	-	10.9274	6.92e-05	1	TAGGCTTAATCTGAT
973	mamo-L	BGIBMGA001983	up	406	420	+	10.5726	9.33e-05	1	TAGGCTAATATTTAT
974	mamo-L	BGIBMGA001988	up	1153	1167	-	11.6613	3.5e-05	1	AAGGCTCGGTTTTTT
975	mamo-L	BGIBMGA001988	down	1901	1915	+	11.4677	4.22e-05	1	TAGGCCCTGTTTATC
976	mamo-L	BGIBMGA001993	down	743	757	-	10.9194	6.98e-05	1	TAGGCTACTTTTTTT
977	mamo-L	BGIBMGA001993	down	456	470	+	10.5726	9.33e-05	1	TAGGCTAATATTTAT
978	mamo-L	BGIBMGA001998	down	672	686	+	12.0484	2.38e-05	1	TAGGCGTATGACGTT
979	mamo-L	BGIBMGA002000	up	819	833	-	12.9919	8.1e-06	1	TAGGCCGGTTTTGCA
980	mamo-L	BGIBMGA002001	down	115	129	+	10.9435	6.83e-05	1	AAGGCTGCGTGTGTT
981	mamo-L	BGIBMGA002003	up	797	811	+	12.1129	2.22e-05	1	TAGGCTGGTTCTGGC
982	mamo-L	BGIBMGA002004	down	585	599	+	10.6452	8.79e-05	1	TAGGCTGTTACTTGT
983	mamo-L	BGIBMGA002005	up	1085	1099	+	12.0242	2.44e-05	1	TAGGCCTCCTTTGGA
984	mamo-L	BGIBMGA002010	down	1819	1833	-	11.2016	5.41e-05	1	TAGGCTGGCTGTTTA
985	mamo-L	BGIBMGA002010	up	1810	1824	-	10.7823	7.84e-05	1	TAGGCATATGGTGAT
986	mamo-L	BGIBMGA002012	up	1487	1501	+	10.5726	9.33e-05	1	TAGGCTAATATTTAT
987	mamo-L	BGIBMGA002014	up	209	223	+	12.3629	1.69e-05	1	AAGGCTAAGTTTGGT
988	mamo-L	BGIBMGA002015	up	883	897	+	11.2823	5.03e-05	1	AAGGCGGTTTTTTTT
989	mamo-L	BGIBMGA002015	down	792	806	+	10.9677	6.68e-05	1	TAGGCCAGTTTCTTT
990	mamo-L	BGIBMGA002017	up	220	234	-	10.5726	9.33e-05	1	TAGGCTAATATTTAT
991	mamo-L	BGIBMGA002019	down	1794	1808	+	11.2177	5.34e-05	1	TAGGCGAGATTTGAT
992	mamo-L	BGIBMGA002023	down	656	670	-	10.6371	8.85e-05	1	TAGGCCGTGCTCTTT
993	mamo-L	BGIBMGA002026	up	1696	1710	+	10.5726	9.33e-05	1	TAGGCTAATATTTAT
994	mamo-L	BGIBMGA002030	down	197	211	-	13.0887	7.18e-06	1	TAGGCCTTGTTTCTT
995	mamo-L	BGIBMGA002031	up	1724	1738	+	10.5726	9.33e-05	1	TAGGCTAATATTTAT
996	mamo-L	BGIBMGA002032	up	1268	1282	-	11.1452	5.7e-05	1	TAGGCCAAGTTTAAT
997	mamo-L	BGIBMGA002033	up	1544	1558	-	10.8145	7.63e-05	1	AAGGCTTTGTGTTTT
998	mamo-L	BGIBMGA002037	down	504	518	+	10.7823	7.84e-05	1	TAGGCCCGTGATCTT
999	mamo-L	BGIBMGA002040	up	471	485	+	11.8548	2.89e-05	1	AAGGCTGTGTTTTGC
1000	mamo-L	BGIBMGA002042	up	904	918	-	10.629	8.91e-05	1	TAGGCCTGCAGCGCC
1001	mamo-L	BGIBMGA002049	up	1143	1157	-	10.4919	9.96e-05	1	TAGGCTTCCTGTGTA
1002	mamo-L	BGIBMGA002050	down	1165	1179	-	12.3468	1.72e-05	1	TAGGCTGTGGGCGAT
1003	mamo-L	BGIBMGA002050	down	1799	1813	-	11.2984	4.95e-05	1	TAGGCCAATGTCGTC
1004	mamo-L	BGIBMGA002050	down	441	455	+	10.5081	9.83e-05	1	TAGGCTCGTCTCGTT
1005	mamo-L	BGIBMGA002051	up	1638	1652	-	11.8065	3.03e-05	1	TAGGCTAATGTTTAT
1006	mamo-L	BGIBMGA002053	down	205	219	-	11.4758	4.18e-05	1	TAGGCACTCTTTTGT
1007	mamo-L	BGIBMGA002054	down	1908	1922	+	11.9516	2.63e-05	1	TAGGCTTATTGTCGT
1008	mamo-L	BGIBMGA002060	down	231	245	+	11.0484	6.23e-05	1	TAGGCGCTCGAGGTT
1009	mamo-L	BGIBMGA002061	up	1735	1749	+	11.0484	6.23e-05	1	TAGGCGCTCGAGGTT
1010	mamo-L	BGIBMGA002061	up	1408	1422	-	10.6452	8.79e-05	1	GAGGCTGAAGTTACT
1011	mamo-L	BGIBMGA002064	up	1370	1384	-	12.7419	1.09e-05	1	GAGGCTCACTTTGTT
1012	mamo-L	BGIBMGA002064	down	39	53	-	10.871	7.28e-05	1	TAGGCCCGGAGCGCT
1013	mamo-L	BGIBMGA002065	up	671	685	-	10.871	7.28e-05	1	TAGGCCCGGAGCGCT
1014	mamo-L	BGIBMGA002069	up	165	179	+	12.8952	9.05e-06	1	TAGGCTGTGTTTAAT
1015	mamo-L	BGIBMGA002070	down	285	299	+	11.1129	5.88e-05	1	AAGGCGGCTTTTGTT
1016	mamo-L	BGIBMGA002073	down	1332	1346	-	11.9113	2.74e-05	1	AAGGCTTGGTTGGTT
1017	mamo-L	BGIBMGA002073	down	113	127	+	10.629	8.91e-05	1	AAGGCGGATGTTGTA
1018	mamo-L	BGIBMGA002074	up	1637	1651	-	11.9113	2.74e-05	1	AAGGCTTGGTTGGTT
1019	mamo-L	BGIBMGA002074	down	647	661	+	11.4113	4.45e-05	1	TAGGCCTAGTATAAT
1020	mamo-L	BGIBMGA002074	up	418	432	+	10.629	8.91e-05	1	AAGGCGGATGTTGTA
1021	mamo-L	BGIBMGA002076	up	1588	1602	-	12.121	2.2e-05	1	TAGGCGTTTGTTGTA
1022	mamo-L	BGIBMGA002078	down	1486	1500	+	12.629	1.24e-05	1	TAGGCCGATTGCGTT
1023	mamo-L	BGIBMGA002080	down	147	161	+	10.5726	9.33e-05	1	TAGGCTAATATTTAT
1024	mamo-L	BGIBMGA002085	down	893	907	-	14.7258	5.83e-07	1	TAGGCTTGCGTTGCC
1025	mamo-L	BGIBMGA002090	up	1580	1594	+	11.2097	5.38e-05	1	TAGGCAGGATTTTTT
1026	mamo-L	BGIBMGA002091	down	1001	1015	-	10.5726	9.33e-05	1	TAGGCTAATATTTAT
1027	mamo-L	BGIBMGA002094	up	1426	1440	+	14.3306	1.21e-06	1	TAGGCGGGGGGTGGT
1028	mamo-L	BGIBMGA002097	down	783	797	+	11.129	5.79e-05	1	TAGGCCTAAGATGGA
1029	mamo-L	BGIBMGA002097	down	113	127	-	10.75	8.06e-05	1	GAGGCCGATTGTGCC
1030	mamo-L	BGIBMGA002100	up	964	978	-	11.25	5.18e-05	1	TAGGCTTAGGTGTGA
1031	mamo-L	BGIBMGA002102	down	256	270	+	11.0645	6.14e-05	1	TAGGCGCTTTATGCC
1032	mamo-L	BGIBMGA002108	up	922	936	-	13.7742	2.79e-06	1	TAGGCGGGTGGTGGT
1033	mamo-L	BGIBMGA002108	down	841	855	-	10.5726	9.33e-05	1	TAGGCTAATATTTAT
1034	mamo-L	BGIBMGA002110	up	786	800	+	11.371	4.62e-05	1	TAGGCTGTATAGGCT
1035	mamo-L	BGIBMGA002112	up	1424	1438	+	13.1935	6.33e-06	1	TAGGCTTTAGTTGCC
1036	mamo-L	BGIBMGA002113	up	1977	1991	-	10.621	8.97e-05	1	AAGGCTGGTTGCGTT
1037	mamo-L	BGIBMGA002114	up	485	499	+	11.4516	4.28e-05	1	AAGGCTTAGTGTTGT
1038	mamo-L	BGIBMGA002116	up	1380	1394	-	11.3548	4.69e-05	1	AAGGCTGATGATGAT
1039	mamo-L	BGIBMGA002126	up	146	160	-	10.7661	7.95e-05	1	GAGGCCGTATTCGTT
1040	mamo-L	BGIBMGA002127	down	43	57	-	12.3548	1.7e-05	1	TAGGCTGTCATTGTA
1041	mamo-L	BGIBMGA002128	down	1226	1240	-	11.3629	4.66e-05	1	TAGGCTCATATTTAT
1042	mamo-L	BGIBMGA002129	up	1905	1919	-	10.9677	6.68e-05	1	TAGGCTGAATTTTCG
1043	mamo-L	BGIBMGA002130	down	1277	1291	+	12.0323	2.42e-05	1	AAGGCCTTGTTTTTT
1044	mamo-L	BGIBMGA002130	down	216	230	+	10.629	8.91e-05	1	TAGGCCTGCAGCGCC
1045	mamo-L	BGIBMGA002130	up	1932	1946	+	10.5726	9.33e-05	1	TAGGCTAATATTTAT
1046	mamo-L	BGIBMGA002135	up	685	699	-	10.6048	9.09e-05	1	TAGGCTTCAATTTTT
1047	mamo-L	BGIBMGA002135	up	841	855	-	10.5081	9.83e-05	1	TAGGCTGCATTTGTG
1048	mamo-L	BGIBMGA002138	down	1213	1227	-	10.5726	9.33e-05	1	TAGGCTAATATTTAT
1049	mamo-L	BGIBMGA002153	down	757	771	-	11.7419	3.23e-05	1	TAGGCGGGAAGTGGT
1050	mamo-L	BGIBMGA002155	up	1195	1209	-	12.3548	1.7e-05	1	TAGGCTGCGGTTGCA
1051	mamo-L	BGIBMGA002156	down	1311	1325	+	12.25	1.92e-05	1	TAGGCTGTGGACGCC
1052	mamo-L	BGIBMGA002156	up	340	354	+	11.9758	2.57e-05	1	TAGGCTGTCTGTGGG
1053	mamo-L	BGIBMGA002158	up	1312	1326	-	10.75	8.06e-05	1	AAGGCCTGTTGTGGC
1054	mamo-L	BGIBMGA002159	up	1647	1661	-	12.4194	1.58e-05	1	TAGGCGTTATTTGTC
1055	mamo-L	BGIBMGA002169	down	292	306	-	12.2258	1.97e-05	1	TAGGCTTTGGGTTAT
1056	mamo-L	BGIBMGA002171	down	1442	1456	+	12.75	1.08e-05	1	TAGGCCAAAGTTGTT
1057	mamo-L	BGIBMGA002171	up	1906	1920	+	12.4919	1.46e-05	1	TAGGCTATTATTGGT
1058	mamo-L	BGIBMGA002174	up	281	295	+	11.121	5.84e-05	1	TAGGCGAAATTTGCC
1059	mamo-L	BGIBMGA002175	up	820	834	+	12.4113	1.6e-05	1	TAGGCTTGTGTTAAT
1060	mamo-L	BGIBMGA002177	down	191	205	+	10.629	8.91e-05	1	TAGGCAGGGTTTGAA
1061	mamo-L	BGIBMGA002179	up	1041	1055	+	12.5565	1.35e-05	1	TAGGCCAGTTTTTGT
1062	mamo-L	BGIBMGA002182	down	1345	1359	-	11.7823	3.11e-05	1	TAGGCGTGGGGCGGC
1063	mamo-L	BGIBMGA002182	up	1582	1596	-	10.75	8.06e-05	1	GAGGCCGATTGTGCC
1064	mamo-L	BGIBMGA002183	up	1913	1927	+	10.5726	9.33e-05	1	TAGGCTAATATTTAT
1065	mamo-L	BGIBMGA002193	down	277	291	-	12.25	1.92e-05	1	TAGGCTGTGGACGCC
1066	mamo-L	BGIBMGA002193	up	1253	1267	+	11.5806	3.78e-05	1	TAGGCTGACATTTTA
1067	mamo-L	BGIBMGA002194	down	113	127	+	11.3952	4.52e-05	1	GAGGCTGTGTTTCCT
1068	mamo-L	BGIBMGA002195	down	929	943	-	11.6129	3.66e-05	1	TAGGCTTTTAATGAT
1069	mamo-L	BGIBMGA002196	down	128	142	-	11.6129	3.66e-05	1	TAGGCTTTTAATGAT
1070	mamo-L	BGIBMGA002198	down	642	656	-	10.5726	9.33e-05	1	TAGGCTAATATTTAT
1071	mamo-L	BGIBMGA002199	up	183	197	-	10.4919	9.96e-05	1	AAGGCCGATGTTAAT
1072	mamo-L	BGIBMGA002200	down	819	833	+	10.8145	7.63e-05	1	TAGGCTTCTATTAGT
1073	mamo-L	BGIBMGA002200	up	743	757	-	10.5403	9.58e-05	1	TAGGCCAATGATAGT
1074	mamo-L	BGIBMGA002204	up	283	297	-	11.1935	5.45e-05	1	TAGGCTTTGTTTACA
1075	mamo-L	BGIBMGA002205	up	1864	1878	+	10.5726	9.33e-05	1	TAGGCTAATATTTAT
1076	mamo-L	BGIBMGA002209	up	801	815	+	11.1613	5.63e-05	1	TAGGCATGGATTTTT
1077	mamo-L	BGIBMGA002213	up	1709	1723	+	12.1855	2.06e-05	1	AAGGCTTTGTTTTCT
1078	mamo-L	BGIBMGA002213	up	340	354	-	10.7742	7.89e-05	1	TAGGCATATAATGGT
1079	mamo-L	BGIBMGA002214	down	515	529	+	10.629	8.91e-05	1	TAGGCCTGCAGCGCC
1080	mamo-L	BGIBMGA002215	down	1131	1145	+	12.1532	2.13e-05	1	TAGGCTGATGCTGAT
1081	mamo-L	BGIBMGA002217	down	1533	1547	+	12.9919	8.1e-06	1	TAGGCCGGTTTTGCA
1082	mamo-L	BGIBMGA002217	up	1934	1948	+	10.5726	9.33e-05	1	TAGGCTAATATTTAT
1083	mamo-L	BGIBMGA002218	down	1153	1167	-	12.1532	2.13e-05	1	TAGGCTGATGCTGAT
1084	mamo-L	BGIBMGA002223	up	639	653	+	12.0323	2.42e-05	1	GAGGCGGAGGATGTT
1085	mamo-L	BGIBMGA002224	up	1068	1082	+	11.7984	3.06e-05	1	AAGGCCTATTTTTTT
1086	mamo-L	BGIBMGA002224	up	1493	1507	-	10.9032	7.07e-05	1	TAGGCCTTGCTTGAC
1087	mamo-L	BGIBMGA002226	down	875	889	-	10.9113	7.02e-05	1	GAGGCGCATTTTGGC
1088	mamo-L	BGIBMGA002227	up	433	447	+	12.0645	2.34e-05	1	TAGGCGGGCTTCGGA
1089	mamo-L	BGIBMGA002227	up	280	294	-	10.8306	7.52e-05	1	TAGGCCCCCTTCGCC
1090	mamo-L	BGIBMGA002230	down	239	253	-	13.3065	5.48e-06	1	TAGGCTTATATTTGT
1091	mamo-L	BGIBMGA002232	down	150	164	-	12.3226	1.77e-05	1	TAGGCCAATTTTTTT
1092	mamo-L	BGIBMGA002232	up	1344	1358	-	10.5726	9.33e-05	1	TAGGCTAATATTTAT
1093	mamo-L	BGIBMGA002234	down	647	661	-	11.5726	3.81e-05	1	TAGGCTTTTTTTTTA
1094	mamo-L	BGIBMGA002239	down	719	733	+	10.8871	7.17e-05	1	TAGGCAAAGGTTTTT
1095	mamo-L	BGIBMGA002240	up	401	415	+	12.2581	1.9e-05	1	AAGGCTGAGGTTGAC
1096	mamo-L	BGIBMGA002244	up	286	300	-	11.4919	4.11e-05	1	TAGGCTTGGTGGTCT
1097	mamo-L	BGIBMGA002245	down	1408	1422	-	12.7984	1.02e-05	1	TAGGCTTGAGTGGTT
1098	mamo-L	BGIBMGA002248	up	680	694	+	10.9194	6.98e-05	1	TAGGCTACTTTTTTT
1099	mamo-L	BGIBMGA002248	down	1496	1510	+	10.5726	9.33e-05	1	TAGGCTAATATTTAT
1100	mamo-L	BGIBMGA002252	up	1079	1093	+	12.3306	1.75e-05	1	TAGGCTTACTATACT
1101	mamo-L	BGIBMGA002269	up	1254	1268	-	11.5968	3.73e-05	1	TAGGCGGCGTGTTGT
1102	mamo-L	BGIBMGA002273	up	549	563	-	10.5484	9.52e-05	1	TAGGCCTTCTTGTGA
1103	mamo-L	BGIBMGA002274	down	1180	1194	-	11.0968	5.97e-05	1	TAGGCTGAGATGGTA
1104	mamo-L	BGIBMGA002277	up	603	617	-	11.629	3.61e-05	1	GAGGCTTTTTTTTTT
1105	mamo-L	BGIBMGA002280	up	1846	1860	+	11.2097	5.38e-05	1	TAGGCTGCGGTTTGG
1106	mamo-L	BGIBMGA002282	down	1983	1997	-	13.6452	3.39e-06	1	TAGGCTTAGTATTGT
1107	mamo-L	BGIBMGA002284	down	1229	1243	-	11.3548	4.69e-05	1	AAGGCTGATGATGAT
1108	mamo-L	BGIBMGA002285	down	287	301	+	11.4758	4.18e-05	1	TAGGCTTATTTGTTC
1109	mamo-L	BGIBMGA002286	up	1455	1469	-	11.9355	2.67e-05	1	TAGGCTCACGGGGCT
1110	mamo-L	BGIBMGA002288	down	794	808	-	11.7903	3.08e-05	1	TAGGCTGAGGGTCAT
1111	mamo-L	BGIBMGA002289	down	406	420	+	10.5726	9.33e-05	1	TAGGCTAATATTTAT
1112	mamo-L	BGIBMGA002291	down	1294	1308	+	10.7581	8e-05	1	TAGGCGGGGAACGAT
1113	mamo-L	BGIBMGA002301	up	978	992	-	10.5726	9.33e-05	1	TAGGCTAATATTTAT
1114	mamo-L	BGIBMGA002302	up	1704	1718	+	11.5323	3.96e-05	1	TAGGCAGTGATTTGT
1115	mamo-L	BGIBMGA002302	up	511	525	-	10.9516	6.78e-05	1	TAGGCTTTGGTATCT
1116	mamo-L	BGIBMGA002302	up	1580	1594	+	10.5806	9.27e-05	1	TAGGCTTTTCTTTGC
1117	mamo-L	BGIBMGA002305	up	1616	1630	+	11.5968	3.73e-05	1	TAGGCGGCGTGTTGT
1118	mamo-L	BGIBMGA002305	down	1923	1937	+	10.879	7.22e-05	1	TAGGCAGTGGCTGCT
1119	mamo-L	BGIBMGA002306	up	709	723	-	12.5161	1.42e-05	1	AAGGCTGTGTTTTTT
1120	mamo-L	BGIBMGA002306	down	320	334	-	10.7903	7.79e-05	1	AAGGCTTATGATTTT
1121	mamo-L	BGIBMGA002306	down	190	204	+	10.5968	9.15e-05	1	GAGGCTAGTTTTTGT
1122	mamo-L	BGIBMGA002308	down	598	612	-	11.7903	3.08e-05	1	TAGGCTCAGATCTGT
1123	mamo-L	BGIBMGA002314	down	1137	1151	+	13.3145	5.41e-06	1	TAGGCTTAGATGGGT
1124	mamo-L	BGIBMGA002314	down	555	569	+	12.1855	2.06e-05	1	TAGGCTATTTTTTTT
1125	mamo-L	BGIBMGA002315	up	1131	1145	-	10.9919	6.55e-05	1	TAGGCTTTAGATGGA
1126	mamo-L	BGIBMGA002315	down	1888	1902	-	10.9194	6.98e-05	1	TAGGCTACTTTTTTT
1127	mamo-L	BGIBMGA002316	down	754	768	+	11.629	3.61e-05	1	GAGGCTTTTTTTTTT
1128	mamo-L	BGIBMGA002316	up	1096	1110	+	10.4919	9.96e-05	1	TAGGCTGTGTCTGTG
1129	mamo-L	BGIBMGA002318	up	539	553	-	12.871	9.35e-06	1	TAGGCTTTTTTTATT
1130	mamo-L	BGIBMGA002322	up	1769	1783	-	10.4919	9.96e-05	1	TAGGCTAGTATTTAT
1131	mamo-L	BGIBMGA002330	up	510	524	-	12.6935	1.15e-05	1	TAGGCTGAGGTGCGT
1132	mamo-L	BGIBMGA002331	down	727	741	+	13.2984	5.54e-06	1	TAGGCGTACGTTCGT
1133	mamo-L	BGIBMGA002331	down	934	948	-	12.1129	2.22e-05	1	TAGGCCGATGATATT
1134	mamo-L	BGIBMGA002331	down	1444	1458	+	11.4677	4.22e-05	1	AAGGCTTACTATTGT
1135	mamo-L	BGIBMGA002331	down	548	562	-	10.629	8.91e-05	1	GAGGCTAATTTTGAT
1136	mamo-L	BGIBMGA002332	up	793	807	-	10.7581	8e-05	1	TAGGCCGTGTTTCCG
1137	mamo-L	BGIBMGA002334	down	1161	1175	+	11.3065	4.91e-05	1	AAGGCGTATTTTTTT
1138	mamo-L	BGIBMGA002338	up	436	450	-	13.3226	5.34e-06	1	TAGGCCGTCGACGGT
1139	mamo-L	BGIBMGA002339	down	1470	1484	-	10.7097	8.33e-05	1	TAGGCTTGGCTGTGT
1140	mamo-L	BGIBMGA002342	down	187	201	-	14.4032	1.06e-06	1	TAGGCTGATTGTGGT
1141	mamo-L	BGIBMGA002344	up	9	23	+	12.3468	1.72e-05	1	AAGGCTTTGGTTTTT
1142	mamo-L	BGIBMGA002355	down	604	618	+	11.4758	4.18e-05	1	TAGGCTGTTTTTTTG
1143	mamo-L	BGIBMGA002358	down	642	656	-	11.2823	5.03e-05	1	AAGGCTGGCAGTGTT
1144	mamo-L	BGIBMGA002362	down	1889	1903	+	12.25	1.92e-05	1	TAGGCCCACTATTCT
1145	mamo-L	BGIBMGA002375	down	1783	1797	-	10.6129	9.03e-05	1	TAGGCTTTCATGATT
1146	mamo-L	BGIBMGA002377	down	856	870	+	10.629	8.91e-05	1	TAGGCCTGCAGCGCC
1147	mamo-L	BGIBMGA002380	up	1727	1741	-	12.1774	2.08e-05	1	TAGGCTTACGGTGCA
1148	mamo-L	BGIBMGA002381	up	65	79	-	13.3548	5.14e-06	1	TAGGCTTATTTTCGT
1149	mamo-L	BGIBMGA002384	up	1865	1879	-	11.9113	2.74e-05	1	TAGGCCGTCGTTTTG
1150	mamo-L	BGIBMGA002388	down	1711	1725	-	11.371	4.62e-05	1	TAGGCTGTATAGGCT
1151	mamo-L	BGIBMGA002391	up	1573	1587	-	10.9839	6.59e-05	1	GAGGCGATGTTTGCT
1152	mamo-L	BGIBMGA002392	up	1134	1148	+	10.5726	9.33e-05	1	TAGGCTAATATTTAT
1153	mamo-L	BGIBMGA002394	up	1833	1847	+	12.7742	1.04e-05	1	TAGGCTTATTATTTT
1154	mamo-L	BGIBMGA002396	up	1648	1662	+	11.5242	3.99e-05	1	TAGGCTGTGTTTATA
1155	mamo-L	BGIBMGA002399	down	1441	1455	+	12.0645	2.34e-05	1	TAGGCGGGCTTCGGA
1156	mamo-L	BGIBMGA002399	up	667	681	+	10.9919	6.55e-05	1	TAGGCTTTAGATGGA
1157	mamo-L	BGIBMGA002401	down	1950	1964	-	11.1935	5.45e-05	1	TAGGCGCATGAGGGT
1158	mamo-L	BGIBMGA002403	up	259	273	+	11.0323	6.32e-05	1	TAGGCTGTCTTGCAT
1159	mamo-L	BGIBMGA002404	down	1534	1548	+	11.0484	6.23e-05	1	TAGGCCTTTAGTTCT
1160	mamo-L	BGIBMGA002405	down	1267	1281	-	11.6855	3.42e-05	1	TAGGCTGCTCTTGGT
1161	mamo-L	BGIBMGA002407	up	1640	1654	-	13.4194	4.7e-06	1	TAGGCCAATTTTGTT
1162	mamo-L	BGIBMGA002411	up	1869	1883	-	10.8468	7.42e-05	1	GAGGCTTATTTTGTA
1163	mamo-L	BGIBMGA002420	down	584	598	-	13.9597	2.11e-06	1	TAGGCCCGCTTTGGC
1164	mamo-L	BGIBMGA002421	up	1685	1699	-	13.9597	2.11e-06	1	TAGGCCCGCTTTGGC
1165	mamo-L	BGIBMGA002425	up	938	952	+	11.7823	3.11e-05	1	TAGGCGTGGGGCGGC
1166	mamo-L	BGIBMGA002428	down	1879	1893	-	10.6613	8.67e-05	1	GAGGCTAAATTTGTT
1167	mamo-L	BGIBMGA002429	down	692	706	+	10.9194	6.98e-05	1	TAGGCTACTTTTTTT
1168	mamo-L	BGIBMGA002430	up	1563	1577	-	11.0968	5.97e-05	1	TAGGCAGTAGTTTTT
1169	mamo-L	BGIBMGA002432	down	1120	1134	-	12.9919	8.1e-06	1	TAGGCCGGTTTTGCA
1170	mamo-L	BGIBMGA002433	down	1666	1680	+	12.2177	1.99e-05	1	AAGGCTTTGTTTTTT
1171	mamo-L	BGIBMGA002434	up	1872	1886	+	11.4516	4.28e-05	1	TAGGCACAGGATGTT
1172	mamo-L	BGIBMGA002434	up	1147	1161	+	11.4113	4.45e-05	1	TAGGCGTGGGGGGGC
1173	mamo-L	BGIBMGA002435	up	605	619	+	10.5968	9.15e-05	1	TAGGCTATAATTTGT
1174	mamo-L	BGIBMGA002436	up	1117	1131	-	12.0645	2.34e-05	1	TAGGCGGGCTTCGGA
1175	mamo-L	BGIBMGA002440	up	1166	1180	+	10.5968	9.15e-05	1	TAGGCTTTAATCTTT
1176	mamo-L	BGIBMGA002441	up	513	527	+	11.7339	3.26e-05	1	TAGGCTTCGAATGTT
1177	mamo-L	BGIBMGA002442	down	1115	1129	+	12.3065	1.8e-05	1	TAGGCCCTCGTTGTA
1178	mamo-L	BGIBMGA002442	up	783	797	-	10.879	7.22e-05	1	AAGGCTGGTTATTTT
1179	mamo-L	BGIBMGA002448	down	1753	1767	+	10.5081	9.83e-05	1	TAGGCGGGGTGTTGG
1180	mamo-L	BGIBMGA002449	down	1653	1667	-	11.7661	3.16e-05	1	TAGGCAGTTTTTTTT
1181	mamo-L	BGIBMGA002449	up	997	1011	+	10.5645	9.4e-05	1	AAGGCTTACTATAGT
1182	mamo-L	BGIBMGA002449	up	1551	1565	+	10.5645	9.4e-05	1	AAGGCTTACTATAGT
1183	mamo-L	BGIBMGA002450	down	1053	1067	+	12.0161	2.46e-05	1	TAGGCGTGTTATTTT
1184	mamo-L	BGIBMGA002452	up	756	770	-	12.0887	2.29e-05	1	TAGGCTGTTGGTGAC
1185	mamo-L	BGIBMGA002452	down	577	591	+	10.879	7.22e-05	1	TAGGCCTCCTTCTGC
1186	mamo-L	BGIBMGA002453	up	303	317	+	10.75	8.06e-05	1	TAGGCTATGTGTAGT
1187	mamo-L	BGIBMGA002454	down	137	151	+	11.0242	6.36e-05	1	TAGGCTGTTTGGTTT
1188	mamo-L	BGIBMGA002455	down	271	285	+	12.0081	2.48e-05	1	TAGGCTATTGGTGTT
1189	mamo-L	BGIBMGA002455	down	930	944	+	11.0081	6.45e-05	1	TAGGCAGGGTAGGGT
1190	mamo-L	BGIBMGA002456	down	123	137	+	12.871	9.35e-06	1	TAGGCGTAGATTTTT
1191	mamo-L	BGIBMGA002460	down	1517	1531	-	13.3387	5.24e-06	1	TAGGCGGGCTTTGGA
1192	mamo-L	BGIBMGA002460	down	557	571	-	12.7661	1.05e-05	1	TAGGCCGACGATCGT
1193	mamo-L	BGIBMGA002460	down	1670	1684	+	12.0968	2.26e-05	1	TAGGCCCTCTTCGCC
1194	mamo-L	BGIBMGA002462	down	75	89	-	13.2258	6.08e-06	1	TAGGCGTTTGTTTTT
1195	mamo-L	BGIBMGA002466	down	766	780	-	12.2177	1.99e-05	1	AAGGCTTTGTTTTTT
1196	mamo-L	BGIBMGA002466	up	667	681	-	11.4516	4.28e-05	1	TAGGCACAGGATGTT
1197	mamo-L	BGIBMGA002466	up	1392	1406	-	11.4113	4.45e-05	1	TAGGCGTGGGGGGGC
1198	mamo-L	BGIBMGA002469	down	802	816	+	12.9919	8.1e-06	1	TAGGCCGGTTTTGCA
1199	mamo-L	BGIBMGA002470	up	301	315	+	12.9194	8.81e-06	1	TAGGCCTTAGTTTTT
1200	mamo-L	BGIBMGA002472	down	1707	1721	+	10.7419	8.11e-05	1	AAGGCTCACTTTACT
1201	mamo-L	BGIBMGA002473	up	566	580	+	12.9919	8.1e-06	1	TAGGCCGGTTTTGCA
1202	mamo-L	BGIBMGA002475	up	291	305	+	11.9758	2.57e-05	1	AAGGCTTTTTTTTGT
1203	mamo-L	BGIBMGA002475	up	2	16	-	10.9839	6.59e-05	1	AAGGCGTTTTTTTTT
1204	mamo-L	BGIBMGA002477	up	1440	1454	+	10.7823	7.84e-05	1	TAGGCCCGCGCGGGT
1205	mamo-L	BGIBMGA002489	up	1014	1028	+	11.2823	5.03e-05	1	AAGGCTTTGTTTACT
1206	mamo-L	BGIBMGA002490	down	810	824	+	11.5726	3.81e-05	1	TAGCCTTACTTTGTT
1207	mamo-L	BGIBMGA002490	up	134	148	-	11.5323	3.96e-05	1	TAGGCGTGAGGTGAT
1208	mamo-L	BGIBMGA002490	down	1440	1454	-	11.3387	4.77e-05	1	TAGGCTGGTGTTATA
1209	mamo-L	BGIBMGA002491	up	804	818	-	12.5242	1.4e-05	1	TGGGCCGACTTTGGT
1210	mamo-L	BGIBMGA002493	up	984	998	-	13.4194	4.7e-06	1	TAGGCGTATTTTTTT
1211	mamo-L	BGIBMGA002493	up	1074	1088	+	11.5323	3.96e-05	1	TAGGCGTGAGGTGAT
1212	mamo-L	BGIBMGA002500	up	313	327	+	12.4355	1.55e-05	1	TAGGCTAGTTGTGGT
1213	mamo-L	BGIBMGA002505	down	1394	1408	-	10.5081	9.83e-05	1	TGGGCCTGTTTTGAT
1214	mamo-L	BGIBMGA002512	down	947	961	+	10.7177	8.28e-05	1	TAGGCGGGCAGTATT
1215	mamo-L	BGIBMGA002515	down	554	568	-	10.5	9.9e-05	1	AAGGCGGGCGTGTTT
1216	mamo-L	BGIBMGA002516	up	351	365	-	10.5	9.9e-05	1	AAGGCGGGCGTGTTT
1217	mamo-L	BGIBMGA002517	up	402	416	-	12.1048	2.24e-05	1	AAGGCTTATTTTGTC
1218	mamo-L	BGIBMGA002517	up	89	103	+	10.6048	9.09e-05	1	TAGGCCCTCTGCTTT
1219	mamo-L	BGIBMGA002518	down	436	450	-	12.4839	1.47e-05	1	TAGGCATGGGTTGCC
1220	mamo-L	BGIBMGA002518	down	335	349	+	11.4032	4.49e-05	1	TAGGCTTCTTTTGTA
1221	mamo-L	BGIBMGA002521	up	1727	1741	-	12.8065	1.01e-05	1	TAGGCTGCTTTTTTT
1222	mamo-L	BGIBMGA002521	up	1062	1076	+	11.621	3.63e-05	1	TAGGCTTTATATTCT
1223	mamo-L	BGIBMGA002521	down	434	448	-	10.9194	6.98e-05	1	TAGGCTACTTTTTTT
1224	mamo-L	BGIBMGA002522	down	1467	1481	+	10.9516	6.78e-05	1	AAGGCTGGTGTGGAT
1225	mamo-L	BGIBMGA002525	up	1637	1651	-	11.2177	5.34e-05	1	TAGGCTAGGATTTGC
1226	mamo-L	BGIBMGA002525	up	677	691	-	10.7742	7.89e-05	1	TAGGCTCTAGACGCT
1227	mamo-L	BGIBMGA002529	up	1850	1864	+	10.6694	8.62e-05	1	TAGGCCGGTATGGAC
1228	mamo-L	BGIBMGA002531	up	324	338	-	10.871	7.28e-05	1	AAGGCTGTTTGTTGT
1229	mamo-L	BGIBMGA002535	up	369	383	-	10.7016	8.39e-05	1	TAGGCCTAATATCCT
1230	mamo-L	BGIBMGA002544	down	472	486	-	11.0484	6.23e-05	1	TAGGCCTGGTGTGAA
1231	mamo-L	BGIBMGA002546	down	43	57	+	10.6129	9.03e-05	1	TAGGCTTTCATGATT
1232	mamo-L	BGIBMGA002555	down	791	805	+	10.5	9.9e-05	1	GAGGCCCAGGTCGTC
1233	mamo-L	BGIBMGA002558	down	160	174	+	11.2097	5.38e-05	1	TAGGCGGACGATTAC
1234	mamo-L	BGIBMGA002561	down	1783	1797	-	11.121	5.84e-05	1	TAGGCTTTGTGTTAC
1235	mamo-L	BGIBMGA002562	up	168	182	-	11.121	5.84e-05	1	TAGGCTTTGTGTTAC
1236	mamo-L	BGIBMGA002565	up	383	397	-	10.5726	9.33e-05	1	TAGGCTAATATTTAT
1237	mamo-L	BGIBMGA002570	down	1173	1187	-	11.0565	6.18e-05	1	TAGGGTTTGTTTGGT
1238	mamo-L	BGIBMGA002573	down	673	687	+	10.9194	6.98e-05	1	TAGGCTACTTTTTTT
1239	mamo-L	BGIBMGA002574	down	337	351	-	10.5726	9.33e-05	1	TAGGCTAATATTTAT
1240	mamo-L	BGIBMGA002582	up	1441	1455	-	10.7823	7.84e-05	1	TAGGCCCGCAGGGGT
1241	mamo-L	BGIBMGA002583	up	1565	1579	-	13.7419	2.91e-06	1	TAGGCTGCCGTTTGT
1242	mamo-L	BGIBMGA002584	up	1233	1247	+	11.6855	3.42e-05	1	TAGGCGTATTTTAAT
1243	mamo-L	BGIBMGA002587	up	1522	1536	-	12.2097	2.01e-05	1	TAGGCCTAATTTATT
1244	mamo-L	BGIBMGA002588	up	1458	1472	+	10.9194	6.98e-05	1	TAGGCTACTTTTTTT
1245	mamo-L	BGIBMGA002588	down	1097	1111	+	10.7661	7.95e-05	1	AAGGCGGGTGATGGC
1246	mamo-L	BGIBMGA002592	up	615	629	+	10.9194	6.98e-05	1	TAGGCTACTTTTTTT
1247	mamo-L	BGIBMGA002599	up	1513	1527	-	10.75	8.06e-05	1	GAGGCCGATTGTGCC
1248	mamo-L	BGIBMGA002603	up	1557	1571	+	11.2903	4.99e-05	1	TAGGCCACGTTTTTT
1249	mamo-L	BGIBMGA002603	down	890	904	+	11.0726	6.09e-05	1	AAGGCTTGATTTTCT
1250	mamo-L	BGIBMGA002604	down	1792	1806	-	10.7581	8e-05	1	AAGGCTTTTTTTATT
1251	mamo-L	BGIBMGA002605	down	1854	1868	+	13.3548	5.14e-06	1	TAGGCTGTGGGTTTT
1252	mamo-L	BGIBMGA002605	up	62	76	-	10.7581	8e-05	1	AAGGCTTTTTTTATT
1253	mamo-L	BGIBMGA002607	up	215	229	+	10.5565	9.46e-05	1	TAGGCTGAAATCTGC
1254	mamo-L	BGIBMGA002610	down	1113	1127	+	10.7258	8.23e-05	1	TAGGCGGGGTGCGGA
1255	mamo-L	BGIBMGA002611	up	1236	1250	+	10.5645	9.4e-05	1	TAGGCTTCGGTTTCG
1256	mamo-L	BGIBMGA002616	down	1976	1990	-	12.379	1.66e-05	1	AAGGCGGTTTTTGTT
1257	mamo-L	BGIBMGA002616	up	1073	1087	-	12.2419	1.94e-05	1	TAGGCTTAGTGCGAT
1258	mamo-L	BGIBMGA002617	up	1236	1250	-	12.379	1.66e-05	1	AAGGCGGTTTTTGTT
1259	mamo-L	BGIBMGA002621	down	644	658	-	13.6774	3.24e-06	1	TAGGCAGACTTTGTT
1260	mamo-L	BGIBMGA002622	up	171	185	-	13.6774	3.24e-06	1	TAGGCAGACTTTGTT
1261	mamo-L	BGIBMGA002624	up	1850	1864	-	10.7581	8e-05	1	AAGGCCTGTTTCTGT
1262	mamo-L	BGIBMGA002625	down	197	211	+	12.4919	1.46e-05	1	TAGGCTGAGGGCGCC
1263	mamo-L	BGIBMGA002627	down	632	646	+	12.7177	1.12e-05	1	TAGGCTTAGTTCTGC
1264	mamo-L	BGIBMGA002628	down	1419	1433	-	11.3387	4.77e-05	1	TAGGCCTTTGTAGTT
1265	mamo-L	BGIBMGA002635	down	1176	1190	+	11.2016	5.41e-05	1	TAGGCCAGCTTTGCG
1266	mamo-L	BGIBMGA002644	up	751	765	+	11.7097	3.34e-05	1	TAGGCATGTTTTTTT
1267	mamo-L	BGIBMGA002644	up	813	827	-	11.6048	3.7e-05	1	TAGGCTCAGGTAGTT
1268	mamo-L	BGIBMGA002646	down	86	100	+	12.2177	1.99e-05	1	TAGGCTTAGATGTGT
1269	mamo-L	BGIBMGA002646	up	1786	1800	+	10.5726	9.33e-05	1	TAGGCTAATATTTAT
1270	mamo-L	BGIBMGA002647	up	1607	1621	-	11.1129	5.88e-05	1	TAGGCCCGCTGTTCC
1271	mamo-L	BGIBMGA002647	up	1835	1849	-	10.5968	9.15e-05	1	TAGGCTCTTATCTTT
1272	mamo-L	BGIBMGA002650	up	231	245	+	10.5484	9.52e-05	1	GAGGCTGGCTATGGA
1273	mamo-L	BGIBMGA002651	down	1861	1875	-	10.5645	9.4e-05	1	AAGGCTGGGTGTGGA
1274	mamo-L	BGIBMGA002656	up	1265	1279	-	12.9032	8.96e-06	1	TAGGCCGGGGATAGT
1275	mamo-L	BGIBMGA002660	up	99	113	+	11.5806	3.78e-05	1	TAGGCTGTAATTAGT
1276	mamo-L	BGIBMGA002664	down	1081	1095	+	10.9597	6.73e-05	1	AAGGCTAATGTTGGC
1277	mamo-L	BGIBMGA002666	up	1312	1326	+	10.6452	8.79e-05	1	TAGGCTTCTTTCAGT
1278	mamo-L	BGIBMGA002667	down	985	999	-	12.4919	1.46e-05	1	TAGGCTGAGGGCGCC
1279	mamo-L	BGIBMGA002669	up	1480	1494	+	11.8871	2.81e-05	1	AAGGCTTATGATGTT
1280	mamo-L	BGIBMGA002672	up	93	107	-	10.7823	7.84e-05	1	AAGGCCGATTGTGCC
1281	mamo-L	BGIBMGA002673	up	1512	1526	-	12.4113	1.6e-05	1	TAGGCATACGTTTTT
1282	mamo-L	BGIBMGA002676	up	859	873	+	10.5081	9.83e-05	1	TAGGCATGTGTGTGT
1283	mamo-L	BGIBMGA002677	down	520	534	+	13.1048	7.05e-06	1	TAGGCCTAGAATGCT
1284	mamo-L	BGIBMGA002677	down	1958	1972	+	11.871	2.85e-05	1	TAGGCCGTCAGTTTT
1285	mamo-L	BGIBMGA002679	up	1248	1262	-	10.5887	9.21e-05	1	TAGGCTTGTTTTTAG
1286	mamo-L	BGIBMGA002680	down	1830	1844	-	11.3387	4.77e-05	1	GAGGCTTACATTTTT
1287	mamo-L	BGIBMGA002682	up	114	128	-	11.0403	6.28e-05	1	GAGGCCGGGTTTGTG
1288	mamo-L	BGIBMGA002682	up	10	24	+	10.9194	6.98e-05	1	TAGGCTACTTTTTTT
1289	mamo-L	BGIBMGA002687	down	261	275	-	11.0726	6.09e-05	1	AAGGCTTGATTTTCT
1290	mamo-L	BGIBMGA002687	up	1224	1238	+	10.9758	6.64e-05	1	AAGGCCCTGTATGCT
1291	mamo-L	BGIBMGA002689	down	1827	1841	+	11.8548	2.89e-05	1	TAGGCCAACGTTCCT
1292	mamo-L	BGIBMGA002690	down	1548	1562	+	12.5645	1.34e-05	1	TAGGCTGTATTTGAC
1293	mamo-L	BGIBMGA002706	up	182	196	-	10.5726	9.33e-05	1	TAGGCTAATATTTAT
1294	mamo-L	BGIBMGA002708	up	1364	1378	+	10.5403	9.58e-05	1	TAGGCTGTATGGTGT
1295	mamo-L	BGIBMGA002709	down	1024	1038	+	12.1129	2.22e-05	1	TAGGCTTTGCTTTGT
1296	mamo-L	BGIBMGA002709	up	1329	1343	-	11.0726	6.09e-05	1	TAGGCCAAGTTTTAC
1297	mamo-L	BGIBMGA002710	up	138	152	+	12.1129	2.22e-05	1	TAGGCTTTGCTTTGT
1298	mamo-L	BGIBMGA002712	up	1646	1660	-	11.4113	4.45e-05	1	AAGGCTGTGATTTTT
1299	mamo-L	BGIBMGA002713	down	1102	1116	+	10.5565	9.46e-05	1	TAGGCGCGGAGTTCT
1300	mamo-L	BGIBMGA002718	down	1655	1669	-	11.371	4.62e-05	1	GAGGCTGATGATTGT
1301	mamo-L	BGIBMGA002719	down	1153	1167	+	11.0565	6.18e-05	1	TAGGGTTTGTTTGGT
1302	mamo-L	BGIBMGA002719	up	924	938	-	10.6129	9.03e-05	1	AAGGCCAGCATTGTT
1303	mamo-L	BGIBMGA002721	up	864	878	-	10.629	8.91e-05	1	TAGGCCTGCAGCGCC
1304	mamo-L	BGIBMGA002724	up	1898	1912	-	10.7661	7.95e-05	1	TAGGCTGGAATGTTT
1305	mamo-L	BGIBMGA002725	down	762	776	-	11.4194	4.42e-05	1	GAGGCCTACGGTGGC
1306	mamo-L	BGIBMGA002727	up	1433	1447	-	11.25	5.18e-05	1	TAGGCTATTTTTACT
1307	mamo-L	BGIBMGA002727	down	1594	1608	-	11.0403	6.28e-05	1	TAGGCTTGCTGCGGA
1308	mamo-L	BGIBMGA002728	up	1538	1552	-	11.0403	6.28e-05	1	TAGGCTTGCTGCGGA
1309	mamo-L	BGIBMGA002731	up	1637	1651	+	12.2823	1.85e-05	1	TAGGCGTTGGTTGTG
1310	mamo-L	BGIBMGA002731	down	1618	1632	-	10.9194	6.98e-05	1	TAGGCTACTTTTTTT
1311	mamo-L	BGIBMGA002731	down	595	609	-	10.879	7.22e-05	1	TAGGCTCACATTTAC
1312	mamo-L	BGIBMGA002732	up	298	312	+	11.1774	5.54e-05	1	GAGGCTTAGAATGTT
1313	mamo-L	BGIBMGA002732	up	824	838	+	11.0645	6.14e-05	1	AAGGCTGGTGGCGGT
1314	mamo-L	BGIBMGA002733	up	1110	1124	-	11.3468	4.73e-05	1	AAGGCGGGTGGTGTT
1315	mamo-L	BGIBMGA002735	up	1658	1672	+	12.5726	1.33e-05	1	TAGGCAGGGTGTGGT
1316	mamo-L	BGIBMGA002735	up	1459	1473	+	12.3145	1.79e-05	1	TAGGCTATTGTTTTT
1317	mamo-L	BGIBMGA002737	down	102	116	-	11.0242	6.36e-05	1	AAGGCCTTGTTTTCC
1318	mamo-L	BGIBMGA002738	down	354	368	-	11.6694	3.47e-05	1	TAGGCTGATGATGCG
1319	mamo-L	BGIBMGA002738	down	1427	1441	-	11.4032	4.49e-05	1	TAGGCTTTTAGCGGT
1320	mamo-L	BGIBMGA002738	up	1552	1566	-	10.9516	6.78e-05	1	TGGGCTTATGTTTGT
1321	mamo-L	BGIBMGA002746	down	358	372	-	11.5403	3.93e-05	1	TAGGCTGAGAGTATT
1322	mamo-L	BGIBMGA002746	down	1970	1984	-	10.8952	7.12e-05	1	TAGGCGCTTTGTTTT
1323	mamo-L	BGIBMGA002748	up	1607	1621	+	12.3065	1.8e-05	1	TAGGCTTGCGTTGAG
1324	mamo-L	BGIBMGA002748	up	1771	1785	+	11.9435	2.65e-05	1	TAGGCGGAGACTGGT
1325	mamo-L	BGIBMGA002750	down	1750	1764	-	12.7581	1.07e-05	1	TAGGCTGTGTAGGTT
1326	mamo-L	BGIBMGA002752	up	571	585	-	10.8548	7.38e-05	1	GAGGCCTGTTTTTAT
1327	mamo-L	BGIBMGA002754	up	627	641	+	12.7258	1.11e-05	1	TAGGCGTGCTTTGTA
1328	mamo-L	BGIBMGA002758	up	1751	1765	+	12.4597	1.51e-05	1	TAGGCTGATATTTAT
1329	mamo-L	BGIBMGA002759	down	1537	1551	-	11.371	4.62e-05	1	TAGGCATAGTTTTTC
1330	mamo-L	BGIBMGA002759	up	124	138	-	11.0968	5.97e-05	1	TAGGCTGAGATGGTA
1331	mamo-L	BGIBMGA002766	up	1735	1749	-	12.7258	1.11e-05	1	TAGGCGTGCTTTGTA
1332	mamo-L	BGIBMGA002773	up	1200	1214	+	10.8952	7.12e-05	1	TAGGCTTACGCTGGG
1333	mamo-L	BGIBMGA002774	down	1844	1858	-	10.4919	9.96e-05	1	TAGGCTGTGTCTGTG
1334	mamo-L	BGIBMGA002775	down	538	552	-	10.8468	7.42e-05	1	TAGGCTGATGAGGAC
1335	mamo-L	BGIBMGA002782	up	189	203	-	10.5403	9.58e-05	1	TAGGCGGGATATTTC
1336	mamo-L	BGIBMGA002785	up	39	53	+	11.25	5.18e-05	1	TAGGCCCATTTCAGT
1337	mamo-L	BGIBMGA002786	up	358	372	-	12.9677	8.3e-06	1	TAGGCGTTTGATGCT
1338	mamo-L	BGIBMGA002787	up	974	988	+	12.0645	2.34e-05	1	TAGGCGGGCTTCGGA
1339	mamo-L	BGIBMGA002788	up	887	901	-	10.8306	7.52e-05	1	TGGGCTGTGTTCGCT
1340	mamo-L	BGIBMGA002789	down	1432	1446	-	11.3548	4.69e-05	1	AAGGCTGATGATGAT
1341	mamo-L	BGIBMGA002790	up	121	135	+	12.6855	1.16e-05	1	TAGGCTTTTTTTCCT
1342	mamo-L	BGIBMGA002791	down	1850	1864	+	11.0242	6.36e-05	1	TAGGCTGGATGTCCT
1343	mamo-L	BGIBMGA002794	down	1441	1455	-	12.5887	1.3e-05	1	TAGGCCAATTTTGAT
1344	mamo-L	BGIBMGA002795	down	689	703	-	12.5887	1.3e-05	1	TAGGCCAATTTTGAT
1345	mamo-L	BGIBMGA002798	up	1632	1646	-	13.0242	7.77e-06	1	TAGGCAGACGTTTGT
1346	mamo-L	BGIBMGA002800	up	908	922	+	10.629	8.91e-05	1	GAGGCTTCCTATGTT
1347	mamo-L	BGIBMGA002800	up	1217	1231	+	10.629	8.91e-05	1	GAGGCTTCCTATGTT
1348	mamo-L	BGIBMGA002800	down	1204	1218	-	10.5726	9.33e-05	1	TAGGCTAATATTTAT
1349	mamo-L	BGIBMGA002804	down	1546	1560	-	11.1613	5.63e-05	1	TAGGCGTTTATTTAT
1350	mamo-L	BGIBMGA002805	down	188	202	-	10.9758	6.64e-05	1	TAGGCCTGCAGCGGC
1351	mamo-L	BGIBMGA002807	up	468	482	-	11.4435	4.31e-05	1	AAGGCGTGTGATGGT
1352	mamo-L	BGIBMGA002810	up	1863	1877	+	10.8226	7.58e-05	1	AAGGCGTAATTTTGT
1353	mamo-L	BGIBMGA002813	down	729	743	+	10.9274	6.92e-05	1	TAGGCTGTGATTTTG
1354	mamo-L	BGIBMGA002815	up	1249	1263	+	10.5726	9.33e-05	1	TAGGCTAATATTTAT
1355	mamo-L	BGIBMGA002820	up	815	829	-	10.8387	7.47e-05	1	TAGGCTGAGATCAAT
1356	mamo-L	BGIBMGA002820	down	379	393	+	10.8226	7.58e-05	1	AAGGCTGGTTTGGAT
1357	mamo-L	BGIBMGA002820	down	571	585	-	10.75	8.06e-05	1	GAGGCCGATTGTGCC
1358	mamo-L	BGIBMGA002822	up	198	212	-	12.1452	2.15e-05	1	TAGGCAGGTGGTGGT
1359	mamo-L	BGIBMGA002822	down	1855	1869	-	12.0323	2.42e-05	1	TAGGCTTTGTATTTC
1360	mamo-L	BGIBMGA002824	down	1826	1840	+	11.1371	5.75e-05	1	AAGGCTATTTTTGCT
1361	mamo-L	BGIBMGA002824	down	66	80	-	10.7097	8.33e-05	1	TAGGCAGAGTTCTGC
1362	mamo-L	BGIBMGA002824	down	787	801	-	10.5565	9.46e-05	1	AAGGCTGTTTGTTTT
1363	mamo-L	BGIBMGA002828	up	1605	1619	+	11.9435	2.65e-05	1	GAGGCTTATATTGTT
1364	mamo-L	BGIBMGA002833	down	1768	1782	-	10.5726	9.33e-05	1	TAGGCTAATATTTAT
1365	mamo-L	BGIBMGA002834	up	1848	1862	-	10.5726	9.33e-05	1	TAGGCTAATATTTAT
1366	mamo-L	BGIBMGA002837	up	209	223	-	12.0645	2.34e-05	1	TAGGCGGGCTTCGGA
1367	mamo-L	BGIBMGA002841	up	1867	1881	-	12.1935	2.05e-05	1	TAGGCTTAAATTTTT
1368	mamo-L	BGIBMGA002842	down	1945	1959	+	11.4758	4.18e-05	1	GAGGCTAGTGTTGCT
1369	mamo-L	BGIBMGA002843	up	102	116	+	12.6935	1.15e-05	1	TAGGCCGACATTATT
1370	mamo-L	BGIBMGA002844	down	1104	1118	-	10.6129	9.03e-05	1	TAGGCTTAAAGCGTT
1371	mamo-L	BGIBMGA002845	down	1016	1030	-	12.7258	1.11e-05	1	TAGGCCCACGATTGT
1372	mamo-L	BGIBMGA002845	up	606	620	-	11.7016	3.37e-05	1	GAGGCGCATGTTGTT
1373	mamo-L	BGIBMGA002845	up	1814	1828	-	10.6129	9.03e-05	1	TAGGCTTAAAGCGTT
1374	mamo-L	BGIBMGA002846	up	1930	1944	+	11.7016	3.37e-05	1	TAGGCAGGTTGTGTT
1375	mamo-L	BGIBMGA002847	down	1684	1698	-	11.75	3.21e-05	1	TAGGCATATATTGCT
1376	mamo-L	BGIBMGA002848	down	848	862	-	10.8306	7.52e-05	1	AAGGCTTTCTATTTT
1377	mamo-L	BGIBMGA002849	up	1364	1378	+	11.5645	3.84e-05	1	GAGGCTTGTTGTGTT
1378	mamo-L	BGIBMGA002850	up	909	923	-	13.2984	5.54e-06	1	TAGGCGCGCGTCGGT
1379	mamo-L	BGIBMGA002851	up	406	420	+	10.7823	7.84e-05	1	TAGGCCGTTTTTATA
1380	mamo-L	BGIBMGA002851	up	1621	1635	-	10.5403	9.58e-05	1	GAGGCTTGTTTGTGT
1381	mamo-L	BGIBMGA002857	down	1868	1882	-	11.371	4.62e-05	1	TAGGCGTGCGGTGGG
1382	mamo-L	BGIBMGA002864	down	1860	1874	+	12.5968	1.28e-05	1	AAGGCTTTCGTTTGT
1383	mamo-L	BGIBMGA002864	up	608	622	-	10.8548	7.38e-05	1	GAGGCCTGTTTTTAT
1384	mamo-L	BGIBMGA002865	down	1182	1196	+	12.0726	2.32e-05	1	TAGGCTTATGATTAT
1385	mamo-L	BGIBMGA002867	down	470	484	+	10.6855	8.51e-05	1	AAGGCGGGTGGTGGC
1386	mamo-L	BGIBMGA002871	up	539	553	+	10.6935	8.45e-05	1	TAGGCAAACTTTTTT
1387	mamo-L	BGIBMGA002872	up	308	322	+	11.1048	5.92e-05	1	TAGGCTTTTATTAGC
1388	mamo-L	BGIBMGA002873	up	1237	1251	+	12.379	1.66e-05	1	TAGGCATACGTTTCT
1389	mamo-L	BGIBMGA002876	up	1283	1297	-	14.7258	5.83e-07	1	TAGGCTTGCGTTGCC
1390	mamo-L	BGIBMGA002877	up	1652	1666	-	11.9274	2.69e-05	1	TAGGCTGTGGTGGGG
1391	mamo-L	BGIBMGA002877	up	1509	1523	-	11.7258	3.29e-05	1	AAGGCCGGGGTTTTC
1392	mamo-L	BGIBMGA002881	down	907	921	+	12.2177	1.99e-05	1	TAGGCTGTGTGTTCC
1393	mamo-L	BGIBMGA002884	up	899	913	+	10.8387	7.47e-05	1	TAGGCTGAGATCAAT
1394	mamo-L	BGIBMGA002884	down	709	723	+	10.4919	9.96e-05	1	TAGGCACGTGTGGTT
1395	mamo-L	BGIBMGA002885	down	50	64	-	10.8548	7.38e-05	1	AAGGCGGGTATTGGC
1396	mamo-L	BGIBMGA002887	up	769	783	-	13.7742	2.79e-06	1	TAGGCTTTTTTTTTT
1397	mamo-L	BGIBMGA002887	up	317	331	+	11.7823	3.11e-05	1	GAGGCTCACTTCGGT
1398	mamo-L	BGIBMGA002889	down	1744	1758	+	11.9435	2.65e-05	1	AAGGCTGGTTATGCT
1399	mamo-L	BGIBMGA002897	down	900	914	-	10.5484	9.52e-05	1	GAGGCTTATTGTTTT
1400	mamo-L	BGIBMGA002898	down	409	423	+	11.9274	2.69e-05	1	TAGGCATTCTTTTCT
1401	mamo-L	BGIBMGA002898	down	685	699	-	11.6774	3.44e-05	1	AAGGCTCACTTTTTT
1402	mamo-L	BGIBMGA002901	up	1226	1240	+	10.629	8.91e-05	1	TAGGCCTGCAGCGCC
1403	mamo-L	BGIBMGA002902	up	631	645	-	12.0806	2.31e-05	1	TAGGCTTGTGTAGGT
1404	mamo-L	BGIBMGA002904	down	280	294	+	11.7419	3.23e-05	1	AAGGCGGATGGTGGT
1405	mamo-L	BGIBMGA002907	down	1942	1956	-	10.5968	9.15e-05	1	TAGGCTAATTTTACC
1406	mamo-L	BGIBMGA002908	down	1761	1775	+	11.1452	5.7e-05	1	TAGGCCGGCTTATTT
1407	mamo-L	BGIBMGA002908	up	17	31	-	10.5968	9.15e-05	1	TAGGCTAATTTTACC
1408	mamo-L	BGIBMGA002911	up	1147	1161	-	12.9919	8.1e-06	1	TAGGCCGGTTTTGCA
1409	mamo-L	BGIBMGA002911	up	1280	1294	-	12.6774	1.17e-05	1	TAGGCTTACTATAGT
1410	mamo-L	BGIBMGA002914	up	409	423	+	10.8065	7.69e-05	1	TAGGCCTGCAGCGAT
1411	mamo-L	BGIBMGA002915	up	1285	1299	-	12.6855	1.16e-05	1	TAGGCTTTTTTTCCT
1412	mamo-L	BGIBMGA002918	up	1978	1992	+	12.9677	8.3e-06	1	TAGGCGTTTGATGCT
1413	mamo-L	BGIBMGA002923	up	309	323	+	12.0645	2.34e-05	1	TAGGCTGTTATTATT
1414	mamo-L	BGIBMGA002924	up	1580	1594	-	11.4032	4.49e-05	1	TAGGCTAATATTTTT
1415	mamo-L	BGIBMGA002924	up	1409	1423	+	11.1613	5.63e-05	1	GAGGCTGTGTATTTT
1416	mamo-L	BGIBMGA002924	up	1936	1950	+	10.7903	7.79e-05	1	TAGGCCTCTTTTGCG
1417	mamo-L	BGIBMGA002927	down	1695	1709	+	10.9516	6.78e-05	1	TAGGCTTTGTTGAAT
1418	mamo-L	BGIBMGA002931	up	712	726	-	10.9194	6.98e-05	1	TAGGCTACTTTTTTT
1419	mamo-L	BGIBMGA002933	up	223	237	+	13.0887	7.18e-06	1	TAGGCTTAGTTTAGC
1420	mamo-L	BGIBMGA002933	down	1749	1763	+	10.8145	7.63e-05	1	TAGGCTGTTAATTAT
1421	mamo-L	BGIBMGA002934	up	1223	1237	+	11.2581	5.14e-05	1	TAGGCTCCGGTTGCA
1422	mamo-L	BGIBMGA002938	down	1254	1268	+	10.6048	9.09e-05	1	TAGGCCTGAAATTTT
1423	mamo-L	BGIBMGA002943	up	1192	1206	-	11.1935	5.45e-05	1	TAGGCTTTGTTTACA
1424	mamo-L	BGIBMGA002945	down	1456	1470	-	13.9677	2.09e-06	1	TAGGCTATGGTTGTT
1425	mamo-L	BGIBMGA002954	down	1947	1961	-	13.4274	4.64e-06	1	TAGGCTCTGGTGGGT
1426	mamo-L	BGIBMGA002956	down	608	622	-	11.8065	3.03e-05	1	TAGGCGCTAATTGGT
1427	mamo-L	BGIBMGA002958	down	311	325	-	12.4032	1.61e-05	1	TAGGCTTTTGTTGTG
1428	mamo-L	BGIBMGA002961	down	1092	1106	-	10.7177	8.28e-05	1	TCGGCTGGGTTTGTC
1429	mamo-L	BGIBMGA002962	up	1058	1072	+	10.7823	7.84e-05	1	TAGGCTAGGGACGAT
1430	mamo-L	BGIBMGA002965	up	222	236	-	11.0161	6.4e-05	1	TAGGCCGCAGTTACT
1431	mamo-L	BGIBMGA002967	up	917	931	-	12.0484	2.38e-05	1	TAGGCCGATAATGAT
1432	mamo-L	BGIBMGA002970	down	1142	1156	-	10.5645	9.4e-05	1	GAGGCCTTTGTCGAT
1433	mamo-L	BGIBMGA002972	down	238	252	-	10.9194	6.98e-05	1	TAGGCTACTTTTTTT
1434	mamo-L	BGIBMGA002977	up	570	584	-	11.1048	5.92e-05	1	AAGGCCCAGGTGGCT
1435	mamo-L	BGIBMGA002978	up	599	613	-	10.5403	9.58e-05	1	TAGGCTGTATGGTGT
1436	mamo-L	BGIBMGA002979	up	256	270	-	10.5726	9.33e-05	1	TAGGCTAATATTTAT
1437	mamo-L	BGIBMGA002980	up	1222	1236	-	12.1452	2.15e-05	1	TAGGCCGGGGCTTCT
1438	mamo-L	BGIBMGA002980	up	1621	1635	+	11.3468	4.73e-05	1	GAGGCGGTGGTTAGT
1439	mamo-L	BGIBMGA002980	down	1546	1560	+	10.8548	7.38e-05	1	TAGGCATTCATTTTT
1440	mamo-L	BGIBMGA002981	down	1585	1599	+	14.2258	1.41e-06	1	TAGGCTTTGGTGGGT
1441	mamo-L	BGIBMGA002984	down	232	246	+	11.7661	3.16e-05	1	TAGGCCCTCGTGTTT
1442	mamo-L	BGIBMGA002986	down	1738	1752	-	11.6935	3.39e-05	1	TAGGCTGTTTGTTTC
1443	mamo-L	BGIBMGA002988	up	1219	1233	-	13.4274	4.64e-06	1	TAGGCTTGTTTTAGT
1444	mamo-L	BGIBMGA002992	down	1486	1500	+	13.2258	6.08e-06	1	TAGGCCATTGTTGTT
1445	mamo-L	BGIBMGA002992	down	1473	1487	-	11.2097	5.38e-05	1	TAGGCGTGTGATACT
1446	mamo-L	BGIBMGA002996	up	182	196	-	12.1855	2.06e-05	1	TAGGCTTTAATTTGT
1447	mamo-L	BGIBMGA002996	down	1650	1664	+	12.1048	2.24e-05	1	TAGGCATGCGATGTT
1448	mamo-L	BGIBMGA002997	down	791	805	+	10.9355	6.88e-05	1	TCGGCTTGTGTTGCT
1449	mamo-L	BGIBMGA002997	up	46	60	-	10.7742	7.89e-05	1	TAGGCTTGGTAGTAT
1450	mamo-L	BGIBMGA002999	up	1710	1724	+	10.6532	8.73e-05	1	TAGGCTTTCAGTGTA
1451	mamo-L	BGIBMGA002999	up	1048	1062	-	10.5323	9.63e-05	1	TAGGCGGCGGTTTGG
1452	mamo-L	BGIBMGA003000	down	1074	1088	+	10.9194	6.98e-05	1	TAGGCTACTTTTTTT
1453	mamo-L	BGIBMGA003002	down	1738	1752	-	12.2742	1.87e-05	1	TAGGCTCAATATGTT
1454	mamo-L	BGIBMGA003003	down	751	765	+	11.3871	4.55e-05	1	TAGGCCGATTATGTG
1455	mamo-L	BGIBMGA003005	up	573	587	-	10.8306	7.52e-05	1	TAGGCCCCCTTCGCC
1456	mamo-L	BGIBMGA003007	up	434	448	+	12.7258	1.11e-05	1	TAGGCGTGCTTTGTA
1457	mamo-L	BGIBMGA003007	up	882	896	+	12.7258	1.11e-05	1	TAGGCGTGCTTTGTA
1458	mamo-L	BGIBMGA003007	down	670	684	-	10.5	9.9e-05	1	GAGGCCCAGGTCGTC
1459	mamo-L	BGIBMGA003015	up	247	261	-	11.4355	4.34e-05	1	GAGGCTTGCGTTCTT
1460	mamo-L	BGIBMGA003024	up	1247	1261	+	12.2258	1.97e-05	1	TAGGCTGCGTTTGCA
1461	mamo-L	BGIBMGA003029	up	1647	1661	+	12.1371	2.17e-05	1	TAGGCTGTATGTGAT
1462	mamo-L	BGIBMGA003031	up	1492	1506	+	12.129	2.19e-05	1	TAGGCTGTGGACTCT
1463	mamo-L	BGIBMGA003033	down	498	512	+	10.7581	8e-05	1	TAGGCGGTTTCTTTT
1464	mamo-L	BGIBMGA003034	up	1006	1020	-	11.0081	6.45e-05	1	GAGGCGTGGTTTCGT
1465	mamo-L	BGIBMGA003035	up	1666	1680	-	11.3548	4.69e-05	1	TAGGCGGAATTTAGC
1466	mamo-L	BGIBMGA003037	up	895	909	-	10.8145	7.63e-05	1	AAGGCTTGGTTGTTT
1467	mamo-L	BGIBMGA003040	up	6	20	-	11.1855	5.5e-05	1	TAGGCGGAGGCGGCT
1468	mamo-L	BGIBMGA003041	up	1979	1993	-	10.5403	9.58e-05	1	TAGGCTTCCAATTCT
1469	mamo-L	BGIBMGA003043	up	1556	1570	+	13.7742	2.79e-06	1	TAGGCGGGTGGTGGT
1470	mamo-L	BGIBMGA003044	up	762	776	+	10.5726	9.33e-05	1	TAGGCTAATATTTAT
1471	mamo-L	BGIBMGA003045	up	1071	1085	-	13.3871	4.9e-06	1	TAGGCTGATGGTGAT
1472	mamo-L	BGIBMGA003045	up	1746	1760	+	12.75	1.08e-05	1	TAGGCGGTCGGCGGT
1473	mamo-L	BGIBMGA003046	up	74	88	-	11.8468	2.92e-05	1	TAGGCCGGGATTAAT
1474	mamo-L	BGIBMGA003046	down	1704	1718	-	10.9355	6.88e-05	1	GAGGCTTGTTTTACT
1475	mamo-L	BGIBMGA003047	up	1589	1603	-	12.6371	1.23e-05	1	TAGGCTGTTCTTGTT
1476	mamo-L	BGIBMGA003054	up	1666	1680	+	11.0081	6.45e-05	1	AAGGCCGGTTTCGAT
1477	mamo-L	BGIBMGA003055	up	378	392	-	11.2984	4.95e-05	1	TAGGCGTAATATTTT
1478	mamo-L	BGIBMGA003060	up	807	821	+	10.6452	8.79e-05	1	TAGGCTCACTTGGTG
1479	mamo-L	BGIBMGA003061	up	366	380	-	12.7339	1.1e-05	1	TAGGCCTTGGCTGTT
1480	mamo-L	BGIBMGA003061	down	671	685	+	11.4435	4.31e-05	1	TAGGCTCATGGGGCT
1481	mamo-L	BGIBMGA003066	down	464	478	-	11.3145	4.87e-05	1	AAGGCCTAATTTTGT
1482	mamo-L	BGIBMGA003073	down	988	1002	+	10.5968	9.15e-05	1	TGGGCCGTGTATGCT
1483	mamo-L	BGIBMGA003074	up	943	957	-	10.6532	8.73e-05	1	GAGGCGGGTGGTGGC
1484	mamo-L	BGIBMGA003076	up	1160	1174	-	11.1935	5.45e-05	1	GAGGCTGATGTCGCC
1485	mamo-L	BGIBMGA003080	up	1909	1923	+	12.5242	1.4e-05	1	GAGGCTTGGGTTTCT
1486	mamo-L	BGIBMGA003080	down	193	207	-	10.8871	7.17e-05	1	TAGGGTTGCTTTGCT
1487	mamo-L	BGIBMGA003081	up	229	243	+	11.6774	3.44e-05	1	TAGGCGGCGTTTTCC
1488	mamo-L	BGIBMGA003081	down	1808	1822	-	11.379	4.58e-05	1	TAGGCGTAGTTTTTG
1489	mamo-L	BGIBMGA003083	up	1113	1127	+	10.8871	7.17e-05	1	TAGGCCTGCTGTCTC
1490	mamo-L	BGIBMGA003084	up	13	27	+	11.9839	2.54e-05	1	AAGGCTTATTTTTTT
1491	mamo-L	BGIBMGA003085	down	639	653	+	11.8306	2.97e-05	1	TAGGCTTGGAGGGGT
1492	mamo-L	BGIBMGA003089	down	1276	1290	-	12.7339	1.1e-05	1	TAGGCAGAGTATGGT
1493	mamo-L	BGIBMGA003089	down	1806	1820	+	12.129	2.19e-05	1	TAGGCCGACGAGGAT
1494	mamo-L	BGIBMGA003089	down	1153	1167	+	10.6532	8.73e-05	1	TAGGCTGTGACGGGT
1495	mamo-L	BGIBMGA003090	up	154	168	+	12.129	2.19e-05	1	TAGGCCGACGAGGAT
1496	mamo-L	BGIBMGA003090	down	578	592	-	11.379	4.58e-05	1	TAGGCTGTAATTGGA
1497	mamo-L	BGIBMGA003095	up	679	693	+	10.8306	7.52e-05	1	AAGGCGGACTGCGGT
1498	mamo-L	BGIBMGA003097	up	118	132	+	10.5161	9.77e-05	1	TAGGCTATCAATGAT
1499	mamo-L	BGIBMGA003098	up	968	982	+	12.9919	8.1e-06	1	TAGGCCGGTTTTGCA
1500	mamo-L	BGIBMGA003098	down	280	294	-	11.3145	4.87e-05	1	TAGGCTTGGGAAGGT
1501	mamo-L	BGIBMGA003099	down	1491	1505	+	11.3145	4.87e-05	1	GAGGCCTAGTTTTCC
1502	mamo-L	BGIBMGA003099	up	882	896	+	10.6855	8.51e-05	1	TAGGCGTACTCTAGT
1503	mamo-L	BGIBMGA003100	down	419	433	+	11.6613	3.5e-05	1	TAGGCTGGTTAGTGT
1504	mamo-L	BGIBMGA003101	down	1518	1532	+	11.9355	2.67e-05	1	GAGGCGTGAGTTGGT
1505	mamo-L	BGIBMGA003101	up	1248	1262	+	11.6613	3.5e-05	1	TAGGCTGGTTAGTGT
1506	mamo-L	BGIBMGA003102	up	1274	1288	-	11.6048	3.7e-05	1	TAGGCACGGGGTGGT
1507	mamo-L	BGIBMGA003103	up	77	91	+	12.871	9.35e-06	1	AAGGCTTACGTTGAT
1508	mamo-L	BGIBMGA003103	down	731	745	+	10.8306	7.52e-05	1	TAGGCCCCCTTCGCC
1509	mamo-L	BGIBMGA003108	down	968	982	-	12.0323	2.42e-05	1	GAGGCCTAATTTGCT
1510	mamo-L	BGIBMGA003108	down	975	989	+	11.6129	3.66e-05	1	TAGGCCTCGTGCGGT
1511	mamo-L	BGIBMGA003108	up	522	536	-	10.5968	9.15e-05	1	GAGGCTAGTTTTTGT
1512	mamo-L	BGIBMGA003112	up	714	728	+	12.0806	2.31e-05	1	TAGGCCTTGTTCGGA
1513	mamo-L	BGIBMGA003113	up	1971	1985	+	13.3871	4.9e-06	1	TAGGCTGATGGTGAT
1514	mamo-L	BGIBMGA003113	up	1296	1310	-	12.75	1.08e-05	1	TAGGCGGTCGGCGGT
1515	mamo-L	BGIBMGA003115	up	376	390	+	11.5806	3.78e-05	1	GAGGCTGTGTTTATT
1516	mamo-L	BGIBMGA003116	down	1672	1686	-	10.629	8.91e-05	1	TAGGCCTGCAGCGCC
1517	mamo-L	BGIBMGA003121	down	1195	1209	+	10.5726	9.33e-05	1	TAGGCTAATATTTAT
1518	mamo-L	BGIBMGA003123	up	929	943	+	11.0081	6.45e-05	1	GAGGCGTGGTTTCGT
1519	mamo-L	BGIBMGA003124	up	1276	1290	+	11.5323	3.96e-05	1	TAGGCGTGAGGTGAT
1520	mamo-L	BGIBMGA003126	down	1063	1077	-	10.9597	6.73e-05	1	TAGGCTAAGGTTTCA
1521	mamo-L	BGIBMGA003127	up	1819	1833	-	10.9597	6.73e-05	1	TAGGCTAAGGTTTCA
1522	mamo-L	BGIBMGA003129	up	1097	1111	+	12.8306	9.76e-06	1	TAGGCAGTTTTTGCT
1523	mamo-L	BGIBMGA003134	down	1469	1483	-	11.3548	4.69e-05	1	GAGGCTTGCGTTGCA
1524	mamo-L	BGIBMGA003135	up	1880	1894	-	11.8065	3.03e-05	1	TAGGCGGTGTGTCGT
1525	mamo-L	BGIBMGA003137	down	1885	1899	+	11.4032	4.49e-05	1	AAGGCGGTTTTTGTC
1526	mamo-L	BGIBMGA003137	down	1864	1878	-	10.5323	9.63e-05	1	AAGGCTTGCGGTAGT
1527	mamo-L	BGIBMGA003138	up	794	808	-	11.4032	4.49e-05	1	TAGGCGGTTTGTAGT
1528	mamo-L	BGIBMGA003141	down	983	997	+	14.75	5.63e-07	1	TAGGCGTTGTTTGTT
1529	mamo-L	BGIBMGA003143	up	456	470	+	12.2258	1.97e-05	1	TAGGCTGCGTGTGAT
1530	mamo-L	BGIBMGA003149	down	1855	1869	-	10.8952	7.12e-05	1	AAGGCCGTTGATTGT
1531	mamo-L	BGIBMGA003150	down	1187	1201	-	13.3871	4.9e-06	1	TAGGCCGTGTATGAT
1532	mamo-L	BGIBMGA003151	down	1872	1886	-	12.0242	2.44e-05	1	TAGGCTTATGTTTTA
1533	mamo-L	BGIBMGA003155	up	1261	1275	-	12.7258	1.11e-05	1	TAGGCGTGCTTTGTA
1534	mamo-L	BGIBMGA003155	up	1709	1723	-	12.7258	1.11e-05	1	TAGGCGTGCTTTGTA
1535	mamo-L	BGIBMGA003156	up	293	307	+	11.8548	2.89e-05	1	TAGGCCCAGATTGAC
1536	mamo-L	BGIBMGA003159	up	158	172	+	10.8145	7.63e-05	1	TAGGCCGAATACTTT
1537	mamo-L	BGIBMGA003161	down	400	414	+	12.2742	1.87e-05	1	TAGGCTCAATATGTT
1538	mamo-L	BGIBMGA003161	up	1524	1538	+	12.2661	1.89e-05	1	TAGGCTGATGATACT
1539	mamo-L	BGIBMGA003165	down	760	774	-	10.9194	6.98e-05	1	TAGGCTACTTTTTTT
1540	mamo-L	BGIBMGA003166	up	1035	1049	+	12.4677	1.49e-05	1	TAGGCTTCTATTGCT
1541	mamo-L	BGIBMGA003168	up	969	983	-	10.5726	9.33e-05	1	TAGGCTAATATTTAT
1542	mamo-L	BGIBMGA003169	up	1551	1565	+	10.7742	7.89e-05	1	TAGGCTTGGTAGTAT
1543	mamo-L	BGIBMGA003176	up	773	787	+	12.4919	1.46e-05	1	TAGGCTGGGTATCTT
1544	mamo-L	BGIBMGA003176	down	868	882	+	10.621	8.97e-05	1	TAGGCCTGATTCGCA
1545	mamo-L	BGIBMGA003181	down	359	373	-	11.8065	3.03e-05	1	AAGGCGCTGTTTGCT
1546	mamo-L	BGIBMGA003184	down	1321	1335	+	11.5242	3.99e-05	1	TAGGCAGACGACGGT
1547	mamo-L	BGIBMGA003185	up	1062	1076	+	12.7258	1.11e-05	1	TAGGCTTGCGTTACC
1548	mamo-L	BGIBMGA003191	up	1620	1634	+	10.5403	9.58e-05	1	TAGGCTGTATGGTGT
1549	mamo-L	BGIBMGA003192	up	142	156	+	11.1048	5.92e-05	1	AAGGCCCAGGTGGCT
1550	mamo-L	BGIBMGA003198	down	1811	1825	+	11.2258	5.3e-05	1	TAGGCTATTTTCTGT
1551	mamo-L	BGIBMGA003199	up	1854	1868	+	11.9435	2.65e-05	1	TAGGCCTTGTTTTTA
1552	mamo-L	BGIBMGA003199	up	1798	1812	+	10.7339	8.17e-05	1	TAGGCTTATAATACT
1553	mamo-L	BGIBMGA003199	up	1210	1224	+	10.6613	8.67e-05	1	AAGGCTGGCGACGGC
1554	mamo-L	BGIBMGA003206	down	1516	1530	-	10.8387	7.47e-05	1	TAGGCCTTTTTGGTA
1555	mamo-L	BGIBMGA003208	up	991	1005	+	11.371	4.62e-05	1	TAGGCTGTATAGGCT
1556	mamo-L	BGIBMGA003214	down	349	363	+	11.2419	5.21e-05	1	AAGGCGGCTGTTGTT
1557	mamo-L	BGIBMGA003216	down	200	214	-	11.1935	5.45e-05	1	TAGGCTAACTTTTAC
1558	mamo-L	BGIBMGA003217	down	1520	1534	-	11.0484	6.23e-05	1	TAGGCACGTGGTGGT
1559	mamo-L	BGIBMGA003219	up	890	904	-	10.5565	9.46e-05	1	TAGGCTATAGTCTGT
1560	mamo-L	BGIBMGA003222	down	324	338	+	11.3952	4.52e-05	1	TAGGCCTTTAGTTGT
1561	mamo-L	BGIBMGA003224	up	266	280	+	12.2419	1.94e-05	1	TAGGCTTAATTTCTT
1562	mamo-L	BGIBMGA003226	down	1311	1325	-	10.8387	7.47e-05	1	TAGGCCCTCCTTGCC
1563	mamo-L	BGIBMGA003227	up	461	475	-	10.8387	7.47e-05	1	TAGGCCCTCCTTGCC
1564	mamo-L	BGIBMGA003230	down	235	249	-	12.0887	2.29e-05	1	TAGGCCGGCTAGGGC
1565	mamo-L	BGIBMGA003231	down	1689	1703	+	10.75	8.06e-05	1	GAGGCCGATTGTGCC
1566	mamo-L	BGIBMGA003231	down	34	48	-	10.6371	8.85e-05	1	TAGGCTTTAAATGCC
1567	mamo-L	BGIBMGA003233	up	682	696	+	10.7581	8e-05	1	TCGGCTTACGTTTGT
1568	mamo-L	BGIBMGA003233	up	1538	1552	+	10.6774	8.56e-05	1	GAGGCTGGCTTCGAC
1569	mamo-L	BGIBMGA003235	down	228	242	-	10.5726	9.33e-05	1	TAGGCTAATATTTAT
1570	mamo-L	BGIBMGA003243	up	716	730	-	11.129	5.79e-05	1	GAGGCTTACTGTGCC
1571	mamo-L	BGIBMGA003244	up	1234	1248	-	10.9194	6.98e-05	1	TAGGCTACTTTTTTT
1572	mamo-L	BGIBMGA003245	up	429	443	+	11.371	4.62e-05	1	TAGGCTGTATAGGCT
1573	mamo-L	BGIBMGA003245	up	1876	1890	+	11.371	4.62e-05	1	TAGGCTGTATAGGCT
1574	mamo-L	BGIBMGA003252	up	1182	1196	-	11.2823	5.03e-05	1	AAGGCGGTTTTTTTT
1575	mamo-L	BGIBMGA003253	down	1138	1152	-	13.4113	4.75e-06	1	GAGGCTTGTGTTGGT
1576	mamo-L	BGIBMGA003253	down	515	529	+	11.3145	4.87e-05	1	AAGGCTGGGGCTGCT
1577	mamo-L	BGIBMGA003254	down	1343	1357	-	11.2258	5.3e-05	1	TAGGCCTTTTTCCCT
1578	mamo-L	BGIBMGA003255	up	1519	1533	-	10.8306	7.52e-05	1	TAGGCCCCCTTCGCC
1579	mamo-L	BGIBMGA003256	down	71	85	+	12.2742	1.87e-05	1	TAGGCGAATGTTTGT
1580	mamo-L	BGIBMGA003257	down	1479	1493	+	11.1371	5.75e-05	1	AAGGCTTCAGTTGGT
1581	mamo-L	BGIBMGA003258	down	6	20	+	11.2177	5.34e-05	1	TAGGCTGGTAGTAGT
1582	mamo-L	BGIBMGA003258	down	1438	1452	-	10.5403	9.58e-05	1	TAGGCTGTATGGTGT
1583	mamo-L	BGIBMGA003259	down	1189	1203	-	13.1774	6.47e-06	1	TAGGCTTTGGGTGTC
1584	mamo-L	BGIBMGA003262	down	365	379	-	11.371	4.62e-05	1	TAGGCTAATATTTCT
1585	mamo-L	BGIBMGA003265	down	416	430	+	10.9597	6.73e-05	1	AAGGCTTTTGTTTAT
1586	mamo-L	BGIBMGA003266	up	1009	1023	+	10.5726	9.33e-05	1	TAGGCTAATATTTAT
1587	mamo-L	BGIBMGA003268	down	1230	1244	+	10.9194	6.98e-05	1	TAGGCTACTTTTTTT
1588	mamo-L	BGIBMGA003268	down	711	725	+	10.6048	9.09e-05	1	GAGGCTGAGTCTGGC
1589	mamo-L	BGIBMGA003272	down	624	638	-	11.1935	5.45e-05	1	TAGGCGCATGAGGGT
1590	mamo-L	BGIBMGA003272	up	1595	1609	-	10.8468	7.42e-05	1	AAGGCTTGTTTTCTT
1591	mamo-L	BGIBMGA003274	up	1886	1900	+	11	6.5e-05	1	TAGGCAGGTGGTGAT
1592	mamo-L	BGIBMGA003274	up	564	578	-	10.9032	7.07e-05	1	TAGGCGTTGATGTTT
1593	mamo-L	BGIBMGA003276	down	778	792	-	13.5887	3.68e-06	1	TAGGCCTTTTTTTTT
1594	mamo-L	BGIBMGA003276	down	59	73	+	12.871	9.35e-06	1	TAGGCTTTTTTTATT
1595	mamo-L	BGIBMGA003276	up	1140	1154	+	12.0645	2.34e-05	1	TAGGCGGGCTTCGGA
1596	mamo-L	BGIBMGA003281	up	965	979	+	13.7742	2.79e-06	1	TAGGCGGGTGGTGGT
1597	mamo-L	BGIBMGA003282	down	593	607	+	10.5726	9.33e-05	1	TAGGCCTAAAGTTCT
1598	mamo-L	BGIBMGA003284	down	1349	1363	+	12.2016	2.03e-05	1	TAGGCGCTCTTTAGT
1599	mamo-L	BGIBMGA003284	down	853	867	+	11.371	4.62e-05	1	TAGGCTAGTTTTCTT
1600	mamo-L	BGIBMGA003287	down	996	1010	+	10.9194	6.98e-05	1	TAGGCTACTTTTTTT
1601	mamo-L	BGIBMGA003287	up	1807	1821	-	10.7419	8.11e-05	1	AAGGCGCTGTTTTTT
1602	mamo-L	BGIBMGA003289	up	1608	1622	+	13.3145	5.41e-06	1	TAGGCTTAGATGGGT
1603	mamo-L	BGIBMGA003291	down	1028	1042	-	10.5726	9.33e-05	1	TAGGCTGATGGGATT
1604	mamo-L	BGIBMGA003293	down	185	199	+	11.3548	4.69e-05	1	AAGGCTGATGATGAT
1605	mamo-L	BGIBMGA003293	up	1515	1529	+	10.9194	6.98e-05	1	TAGGCTACTTTTTTT
1606	mamo-L	BGIBMGA003295	up	648	662	+	13.4677	4.39e-06	1	TAGGCTGATGATGAT
1607	mamo-L	BGIBMGA003296	down	139	153	+	11.5726	3.81e-05	1	TAGGCTGAGGTCTCA
1608	mamo-L	BGIBMGA003297	down	1851	1865	-	10.9516	6.78e-05	1	AAGGCTGAGTTTCAT
1609	mamo-L	BGIBMGA003302	up	6	20	+	12.3306	1.75e-05	1	TAGGCCGTGATTTCC
1610	mamo-L	BGIBMGA003302	up	1373	1387	+	11.9032	2.76e-05	1	TAGGCCGATTGTATT
1611	mamo-L	BGIBMGA003302	up	1576	1590	+	11.9032	2.76e-05	1	TAGGCCGATTGTATT
1612	mamo-L	BGIBMGA003303	up	214	228	-	11.7661	3.16e-05	1	TAGGCCGATCTTGCC
1613	mamo-L	BGIBMGA003303	up	1939	1953	+	10.9919	6.55e-05	1	TAGGCCGGTTTTACA
1614	mamo-L	BGIBMGA003304	up	1657	1671	-	11.8065	3.03e-05	1	TAGGCTAATGTTTAT
1615	mamo-L	BGIBMGA003305	down	1470	1484	-	11.4355	4.34e-05	1	AAGGCTTATTTGGTT
1616	mamo-L	BGIBMGA003307	down	144	158	-	13.0887	7.18e-06	1	TAGGCTGTGTCTGTT
1617	mamo-L	BGIBMGA003308	down	1658	1672	+	12.0323	2.42e-05	1	TAGGCACGGGTTGGC
1618	mamo-L	BGIBMGA003309	up	1210	1224	-	11.6371	3.58e-05	1	TAGGCGCTCGGTGTC
1619	mamo-L	BGIBMGA003309	down	574	588	+	11.4355	4.34e-05	1	AAGGCTTGCGGTTGT
1620	mamo-L	BGIBMGA003309	up	1560	1574	-	10.9435	6.83e-05	1	TAGGCCGGTTACAGT
1621	mamo-L	BGIBMGA003314	up	1635	1649	+	10.5968	9.15e-05	1	GAGGCTAGTTTTTGT
1622	mamo-L	BGIBMGA003315	up	1322	1336	-	10.9274	6.92e-05	1	TAGGCTGTGAACTTT
1623	mamo-L	BGIBMGA003319	down	1504	1518	-	12.6613	1.19e-05	1	TAGGCATAGTTTTGT
1624	mamo-L	BGIBMGA003320	down	1121	1135	+	13.0806	7.24e-06	1	TAGGCTTTGGTGGAT
1625	mamo-L	BGIBMGA003330	down	476	490	-	13.0968	7.11e-06	1	TAGGCTGAGGTCGAC
1626	mamo-L	BGIBMGA003330	up	735	749	-	11.1935	5.45e-05	1	TAGGCCGACGGTTCA
1627	mamo-L	BGIBMGA003332	up	166	180	-	11.1371	5.75e-05	1	AAGGCCTTCTTTTAT
1628	mamo-L	BGIBMGA003332	up	1884	1898	+	11	6.5e-05	1	TAGGCCGCGTTCATT
1629	mamo-L	BGIBMGA003334	up	483	497	-	11.5806	3.78e-05	1	TAGGCCCACGATTAT
1630	mamo-L	BGIBMGA003334	up	1211	1225	+	11.5161	4.02e-05	1	TAGCCCTACGTTGTT
1631	mamo-L	BGIBMGA003335	up	1860	1874	-	11.9516	2.63e-05	1	AAGGCTTAGTTTAGT
1632	mamo-L	BGIBMGA003336	down	1932	1946	-	10.9919	6.55e-05	1	GAGGCGGAGGGCGGT
1633	mamo-L	BGIBMGA003348	down	1004	1018	+	11	6.5e-05	1	TAGGCATGCGTGTGT
1634	mamo-L	BGIBMGA003349	up	1617	1631	-	10.5726	9.33e-05	1	TAGGCTAATTTCTGC
1635	mamo-L	BGIBMGA003351	down	1537	1551	+	10.75	8.06e-05	1	GAGGCCGATTGTGCC
1636	mamo-L	BGIBMGA003355	up	1801	1815	-	10.8226	7.58e-05	1	GAGGCGTAGTTTTCC
1637	mamo-L	BGIBMGA003356	down	1352	1366	-	11.7258	3.29e-05	1	TAGGCTTATTCTGAT
1638	mamo-L	BGIBMGA003356	up	24	38	-	10.8226	7.58e-05	1	AAGGCTGGTTTGGAT
1639	mamo-L	BGIBMGA003359	up	378	392	-	11.371	4.62e-05	1	TAGGCGGACTTCAGC
1640	mamo-L	BGIBMGA003360	up	202	216	+	10.75	8.06e-05	1	GAGGCTGAAGTTTAT
1641	mamo-L	BGIBMGA003362	up	1490	1504	-	11.9032	2.76e-05	1	AAGGCTTGTTTTTTT
1642	mamo-L	BGIBMGA003363	down	324	338	-	10.9113	7.02e-05	1	TAGGCTGTTGGTTGA
1643	mamo-L	BGIBMGA003364	down	1263	1277	+	12.7903	1.02e-05	1	TAGGCTTGTTCTGGT
1644	mamo-L	BGIBMGA003364	up	590	604	+	10.9194	6.98e-05	1	TAGGCTACTTTTTTT
1645	mamo-L	BGIBMGA003365	down	911	925	+	10.629	8.91e-05	1	TAGGCCTGCAGCGCC
1646	mamo-L	BGIBMGA003366	down	834	848	+	11.9032	2.76e-05	1	TAGGCGGTGGTCATT
1647	mamo-L	BGIBMGA003366	up	1653	1667	+	10.629	8.91e-05	1	TAGGCCTGCAGCGCC
1648	mamo-L	BGIBMGA003366	down	1870	1884	+	10.5726	9.33e-05	1	TCGGCGTTGGTTGCT
1649	mamo-L	BGIBMGA003368	up	1080	1094	+	11.7097	3.34e-05	1	TAGGCTAAATTTTTT
1650	mamo-L	BGIBMGA003372	down	605	619	+	10.5726	9.33e-05	1	TAGGCTAATATTTAT
1651	mamo-L	BGIBMGA003374	up	1729	1743	+	12.2742	1.87e-05	1	TAGGCATTCTTTTGT
1652	mamo-L	BGIBMGA003376	down	590	604	-	12.7823	1.03e-05	1	TAGGCCTTTGTTACT
1653	mamo-L	BGIBMGA003379	up	1360	1374	+	11.1855	5.5e-05	1	TAGGCTTATATTTAC
1654	mamo-L	BGIBMGA003381	down	1663	1677	+	11.2339	5.26e-05	1	TAGGCGGATATGGAT
1655	mamo-L	BGIBMGA003382	up	1478	1492	+	11.2339	5.26e-05	1	TAGGCGGATATGGAT
1656	mamo-L	BGIBMGA003382	down	535	549	-	10.621	8.97e-05	1	TCGGCGTGCTTTGCT
1657	mamo-L	BGIBMGA003383	up	339	353	+	11.2339	5.26e-05	1	TAGGCGGATATGGAT
1658	mamo-L	BGIBMGA003384	up	1909	1923	-	11.9597	2.61e-05	1	TAGGCTTCGATTTTT
1659	mamo-L	BGIBMGA003384	down	1442	1456	-	10.9435	6.83e-05	1	TAGGCGTTTTATTAT
1660	mamo-L	BGIBMGA003388	up	1159	1173	-	11.7258	3.29e-05	1	AAGGCTATGTTTGTT
1661	mamo-L	BGIBMGA003388	up	1742	1756	-	11.6532	3.53e-05	1	TAGGCAGACGATGAT
1662	mamo-L	BGIBMGA003388	up	69	83	+	11.25	5.18e-05	1	TAGGCCCATTTCAGT
1663	mamo-L	BGIBMGA003388	up	1167	1181	+	10.6129	9.03e-05	1	TAGCCTTGCGTTGCC
1664	mamo-L	BGIBMGA003389	up	1608	1622	-	10.8468	7.42e-05	1	TAGGCTTGTATTCCC
1665	mamo-L	BGIBMGA003392	up	282	296	+	11.0968	5.97e-05	1	TAGGCCATTTTTATT
1666	mamo-L	BGIBMGA003394	down	245	259	+	11.7258	3.29e-05	1	TAGGCTTATTCTGAT
1667	mamo-L	BGIBMGA003400	down	122	136	+	13.1048	7.05e-06	1	TAGGCTTAGGTGTCT
1668	mamo-L	BGIBMGA003402	down	676	690	+	12.6855	1.16e-05	1	TAGGCTTTTTTTCCT
1669	mamo-L	BGIBMGA003403	down	1975	1989	+	10.8306	7.52e-05	1	TAGGCCCCCTTCGCC
1670	mamo-L	BGIBMGA003407	up	1844	1858	+	11.6371	3.58e-05	1	TAGGCTTATTGTCTT
1671	mamo-L	BGIBMGA003407	down	1114	1128	+	11.2258	5.3e-05	1	TAGGCTTACAATACT
1672	mamo-L	BGIBMGA003407	down	190	204	+	10.9194	6.98e-05	1	TAGGCTACTTTTTTT
1673	mamo-L	BGIBMGA003409	down	381	395	+	11.7177	3.32e-05	1	AAGGCGTGCTTTTTT
1674	mamo-L	BGIBMGA003410	down	198	212	+	10.9194	6.98e-05	1	TAGGCTACTTTTTTT
1675	mamo-L	BGIBMGA003411	down	1800	1814	-	11.3226	4.83e-05	1	AAGGCCGAGAATGTT
1676	mamo-L	BGIBMGA003412	up	323	337	-	10.5	9.9e-05	1	GAGGCCCAGGTCGTC
1677	mamo-L	BGIBMGA003414	down	205	219	-	12.5081	1.43e-05	1	TAGGCTAATTTTTTT
1678	mamo-L	BGIBMGA003415	up	1079	1093	-	12.5081	1.43e-05	1	TAGGCTAATTTTTTT
1679	mamo-L	BGIBMGA003416	up	831	845	-	11.4597	4.25e-05	1	TAGGCTTACTATTAC
1680	mamo-L	BGIBMGA003419	up	413	427	-	11.371	4.62e-05	1	TAGGCGCATGTGGAT
1681	mamo-L	BGIBMGA003421	down	49	63	-	12.2097	2.01e-05	1	TAGGCTTGTTTTTAC
1682	mamo-L	BGIBMGA003423	down	1003	1017	-	12.5806	1.31e-05	1	TAGGCTTACATTATT
1683	mamo-L	BGIBMGA003425	up	27	41	+	11.5484	3.9e-05	1	GAGGCTTAAGTTGAT
1684	mamo-L	BGIBMGA003426	up	937	951	-	11.2258	5.3e-05	1	TAGGCCTTTTTCCCT
1685	mamo-L	BGIBMGA003426	up	1944	1958	+	10.5726	9.33e-05	1	TAGGCTAATATTTAT
1686	mamo-L	BGIBMGA003427	up	1605	1619	-	11.4516	4.28e-05	1	AAGGCCGGGCTTGGT
1687	mamo-L	BGIBMGA003429	down	1828	1842	+	11.121	5.84e-05	1	GAGGCTAACTTTGAT
1688	mamo-L	BGIBMGA003431	down	857	871	+	10.5968	9.15e-05	1	GAGGCTAGTTTTTGT
1689	mamo-L	BGIBMGA003432	up	1743	1757	+	10.5968	9.15e-05	1	GAGGCTAGTTTTTGT
1690	mamo-L	BGIBMGA003435	down	489	503	-	12.7016	1.14e-05	1	AAGGCGGATTTTGTT
1691	mamo-L	BGIBMGA003435	up	425	439	+	11.6371	3.58e-05	1	TAGGCGCTCGGTGTC
1692	mamo-L	BGIBMGA003435	up	75	89	+	10.9435	6.83e-05	1	TAGGCCGGTTACAGT
1693	mamo-L	BGIBMGA003436	up	1833	1847	-	12.7016	1.14e-05	1	AAGGCGGATTTTGTT
1694	mamo-L	BGIBMGA003436	down	1878	1892	-	11.3548	4.69e-05	1	AAGGCTGATGATGAT
1695	mamo-L	BGIBMGA003437	down	1031	1045	+	11.4355	4.34e-05	1	AAGGCTTATTTGGTT
1696	mamo-L	BGIBMGA003439	up	775	789	+	12.7258	1.11e-05	1	TAGGCGTGCTTTGTA
1697	mamo-L	BGIBMGA003439	down	1828	1842	-	10.621	8.97e-05	1	GAGGCTCAATTTGAT
1698	mamo-L	BGIBMGA003442	down	749	763	-	11.5726	3.81e-05	1	TAGGCTGAGGTCTCA
1699	mamo-L	BGIBMGA003442	down	1867	1881	-	11.2097	5.38e-05	1	AAGGCTGCGATTGCT
1700	mamo-L	BGIBMGA003444	down	1575	1589	+	10.9194	6.98e-05	1	TAGGCTACTTTTTTT
1701	mamo-L	BGIBMGA003452	down	681	695	+	10.5968	9.15e-05	1	TAGCCTGATTTTTGT
1702	mamo-L	BGIBMGA003453	up	646	660	+	10.5968	9.15e-05	1	TAGCCTGATTTTTGT
1703	mamo-L	BGIBMGA003456	up	890	904	+	12.3306	1.75e-05	1	TAGGCTTACTATACT
1704	mamo-L	BGIBMGA003457	down	48	62	+	12.2339	1.95e-05	1	GAGGCGGGAGTTGGT
1705	mamo-L	BGIBMGA003457	up	463	477	+	12.2097	2.01e-05	1	TAGGCCGTGTTGAGT
1706	mamo-L	BGIBMGA003462	down	1525	1539	+	10.6452	8.79e-05	1	GAGGCTGAGAATGAT
1707	mamo-L	BGIBMGA003463	up	531	545	-	10.6371	8.85e-05	1	TAGGCTAATTAGGTT
1708	mamo-L	BGIBMGA003465	down	1560	1574	-	11.4274	4.38e-05	1	TAGGCGCAGGTTATC
1709	mamo-L	BGIBMGA003466	up	590	604	+	12.7258	1.11e-05	1	TAGGCGTGCTTTGTA
1710	mamo-L	BGIBMGA003466	down	836	850	+	11.0968	5.97e-05	1	TAGGCTGAGATGGTA
1711	mamo-L	BGIBMGA003473	down	366	380	+	12.75	1.08e-05	1	TAGGCCGAGGGTCGT
1712	mamo-L	BGIBMGA003473	down	320	334	-	10.871	7.28e-05	1	TAGGGCTTGTTTGGT
1713	mamo-L	BGIBMGA003475	up	1	15	-	12.0484	2.38e-05	1	TAGGCTGACGGTAGC
1714	mamo-L	BGIBMGA003475	up	272	286	+	10.6371	8.85e-05	1	TAGGCGTTTGGTGGG
1715	mamo-L	BGIBMGA003477	down	282	296	-	11.25	5.18e-05	1	TAGGCTCTGGTAGCT
1716	mamo-L	BGIBMGA003478	up	241	255	-	11.25	5.18e-05	1	TAGGCTCTGGTAGCT
1717	mamo-L	BGIBMGA003480	up	545	559	-	14.621	7.29e-07	1	TAGGCTTAGTTTTCT
1718	mamo-L	BGIBMGA003480	down	1934	1948	-	11.2016	5.41e-05	1	GAGGCTGACTCTGTT
1719	mamo-L	BGIBMGA003488	down	1214	1228	+	10.6694	8.62e-05	1	TAGGCTGTTAATTTC
1720	mamo-L	BGIBMGA003507	up	1391	1405	+	11.3145	4.87e-05	1	TAGGCGTACTTTTTG
1721	mamo-L	BGIBMGA003516	down	351	365	+	14.2177	1.43e-06	1	TAGGCTGATTTCGTT
1722	mamo-L	BGIBMGA003517	up	1077	1091	+	10.5645	9.4e-05	1	TCGGCTTGGTTTGAT
1723	mamo-L	BGIBMGA003521	up	1599	1613	+	12.2903	1.83e-05	1	TAGGCTCCCTTTGCC
1724	mamo-L	BGIBMGA003522	up	582	596	-	10.5	9.9e-05	1	GAGGCCCAGGTCGTC
1725	mamo-L	BGIBMGA003527	down	1163	1177	-	11.7984	3.06e-05	1	TAGGCTTTGCTTTTT
1726	mamo-L	BGIBMGA003530	down	623	637	+	14.7177	5.94e-07	1	TAGGCGCAGGTTGGT
1727	mamo-L	BGIBMGA003531	down	1667	1681	+	12.5968	1.28e-05	1	AAGGCTTTCGTTTGT
1728	mamo-L	BGIBMGA003531	down	1779	1793	-	10.9597	6.73e-05	1	TAGGCGTGGTGTGCG
1729	mamo-L	BGIBMGA003535	up	128	142	+	13.4677	4.39e-06	1	TAGGCTTGGATTTTT
1730	mamo-L	BGIBMGA003536	up	657	671	+	10.8548	7.38e-05	1	GAGGCCTGTTTTTAT
1731	mamo-L	BGIBMGA003538	down	819	833	-	11.7984	3.06e-05	1	TAGGCCACTTTTGCT
1732	mamo-L	BGIBMGA003538	down	1044	1058	+	11.0887	6.01e-05	1	TAGGCCGCTTTTGCG
1733	mamo-L	BGIBMGA003539	down	561	575	-	10.4919	9.96e-05	1	TAGGCCGACATTATA
1734	mamo-L	BGIBMGA003541	down	792	806	+	10.5645	9.4e-05	1	TAGGCCTACTGGGGA
1735	mamo-L	BGIBMGA003543	down	1312	1326	+	10.7097	8.33e-05	1	GAGGCATATTTTGCT
1736	mamo-L	BGIBMGA003543	up	435	449	-	10.5645	9.4e-05	1	TAGGCGGGGTAGTGC
1737	mamo-L	BGIBMGA003550	down	1752	1766	+	12.2984	1.81e-05	1	TAGGCTGTGACTGGT
1738	mamo-L	BGIBMGA003550	down	819	833	+	11.5484	3.9e-05	1	TAGGCTTTTTATATT
1739	mamo-L	BGIBMGA003550	up	856	870	-	10.871	7.28e-05	1	AAGGCTGTTTGTTGT
1740	mamo-L	BGIBMGA003552	up	1747	1761	-	11.3952	4.52e-05	1	TAGGCTCATGATGAC
1741	mamo-L	BGIBMGA003552	up	1073	1087	+	10.8065	7.69e-05	1	TAGGCCGACATTAGA
1742	mamo-L	BGIBMGA003559	up	532	546	-	11.9919	2.52e-05	1	AAGGCTTAGTTGGTT
1743	mamo-L	BGIBMGA003562	down	1715	1729	-	11.5887	3.75e-05	1	GAGGCTGGTGTTGAC
1744	mamo-L	BGIBMGA003563	up	1786	1800	-	11.5887	3.75e-05	1	GAGGCTGGTGTTGAC
1745	mamo-L	BGIBMGA003567	down	915	929	+	12.3952	1.63e-05	1	TAGGCCGACTGTATT
1746	mamo-L	BGIBMGA003567	up	1706	1720	-	11.9355	2.67e-05	1	TAGGCGATAGTTGTT
1747	mamo-L	BGIBMGA003567	up	1564	1578	-	11.6532	3.53e-05	1	AAGGCTTTTATTGTT
1748	mamo-L	BGIBMGA003567	down	1801	1815	-	10.9194	6.98e-05	1	TAGGCTACTTTTTTT
1749	mamo-L	BGIBMGA003570	down	1095	1109	-	12.8065	1.01e-05	1	TAGGCTTACGTTACC
1750	mamo-L	BGIBMGA003576	up	1980	1994	-	10.5726	9.33e-05	1	TAGGCTAATATTTAT
1751	mamo-L	BGIBMGA003579	up	1225	1239	+	12.2419	1.94e-05	1	AAGGCCTGGTTTTCT
1752	mamo-L	BGIBMGA003580	down	1836	1850	+	10.621	8.97e-05	1	GAGGCGAACGTTTGT
1753	mamo-L	BGIBMGA003581	down	741	755	-	11.4597	4.25e-05	1	TAGGCGGGGTGGTGT
1754	mamo-L	BGIBMGA003582	up	1455	1469	+	10.7581	8e-05	1	TAGGCTGAGTGTAGA
1755	mamo-L	BGIBMGA003582	down	915	929	+	10.7419	8.11e-05	1	TAGGCTTTTTTTTAA
1756	mamo-L	BGIBMGA003591	down	270	284	-	14.2016	1.47e-06	1	TAGGCGGGGTGTGGT
1757	mamo-L	BGIBMGA003592	up	993	1007	-	14.2016	1.47e-06	1	TAGGCGGGGTGTGGT
1758	mamo-L	BGIBMGA003598	up	791	805	-	12.9919	8.1e-06	1	TAGGCCGGTTTTGCA
1759	mamo-L	BGIBMGA003598	down	1448	1462	+	11.4758	4.18e-05	1	AAGGCGGATGATGCT
1760	mamo-L	BGIBMGA003603	down	586	600	-	11.75	3.21e-05	1	AAGGCTCTCGTTGAT
1761	mamo-L	BGIBMGA003609	down	824	838	-	12.7419	1.09e-05	1	TAGGCGTGCTGTTGT
1762	mamo-L	BGIBMGA003609	up	1425	1439	+	12.4516	1.53e-05	1	TAGGCTGAAGTCTTT
1763	mamo-L	BGIBMGA003609	down	1093	1107	-	10.9194	6.98e-05	1	TAGGCTACTTTTTTT
1764	mamo-L	BGIBMGA003610	up	1563	1577	+	11.8306	2.97e-05	1	TAGGCTGTCTGGTGT
1765	mamo-L	BGIBMGA003612	up	1529	1543	+	11.5242	3.99e-05	1	TAGGCTGGCATCATT
1766	mamo-L	BGIBMGA003615	up	798	812	-	10.5968	9.15e-05	1	GAGGCTAGTTTTTGT
1767	mamo-L	BGIBMGA003617	down	404	418	+	13.3387	5.24e-06	1	TAGGCGGGCTTTGGA
1768	mamo-L	BGIBMGA003622	up	385	399	+	11.9032	2.76e-05	1	TAGGCCTGCAGTGCC
1769	mamo-L	BGIBMGA003623	up	1046	1060	+	11.8387	2.94e-05	1	AAGGCCGATTATGCT
1770	mamo-L	BGIBMGA003624	up	1969	1983	+	11.621	3.63e-05	1	AAGGCTTTCGTTTGC
1771	mamo-L	BGIBMGA003626	down	327	341	+	12.4274	1.57e-05	1	TAGGCTAGTTTTTTT
1772	mamo-L	BGIBMGA003636	up	254	268	-	10.9839	6.59e-05	1	TCGGCGGGGTTTGCT
1773	mamo-L	BGIBMGA003638	up	1472	1486	-	12.7177	1.12e-05	1	TAGGCTTAGTTCTGC
1774	mamo-L	BGIBMGA003641	up	426	440	+	11.3548	4.69e-05	1	AAGGCTGATGATGAT
1775	mamo-L	BGIBMGA003643	up	1014	1028	+	12.4113	1.6e-05	1	TAGGCCTATTACGTT
1776	mamo-L	BGIBMGA003643	up	1599	1613	-	12.0645	2.34e-05	1	TAGGCGGGCTTCGGA
1777	mamo-L	BGIBMGA003643	up	1749	1763	-	10.5645	9.4e-05	1	TAGGCTTATTACACT
1778	mamo-L	BGIBMGA003647	down	293	307	-	10.7097	8.33e-05	1	GAGGCATATTTTGCT
1779	mamo-L	BGIBMGA003649	down	658	672	-	12.2984	1.81e-05	1	TAGGCGTTGTATTCT
1780	mamo-L	BGIBMGA003651	down	704	718	+	10.4919	9.96e-05	1	TAGGCCGACATTATA
1781	mamo-L	BGIBMGA003661	up	1600	1614	-	11.4919	4.11e-05	1	TAGGCCTCTTTTTAT
1782	mamo-L	BGIBMGA003661	up	1606	1620	-	10.8387	7.47e-05	1	TAGGCTTAGGCCTCT
1783	mamo-L	BGIBMGA003678	up	1606	1620	-	10.5645	9.4e-05	1	TCGGCTTGGTTTGAT
1784	mamo-L	BGIBMGA003679	down	1609	1623	-	14.2177	1.43e-06	1	TAGGCTGATTTCGTT
1785	mamo-L	BGIBMGA003681	up	1066	1080	+	10.7016	8.39e-05	1	TAGGCCTAATTAGCT
1786	mamo-L	BGIBMGA003686	up	83	97	-	11.4758	4.18e-05	1	GAGGCCCAGGTCGTT
1787	mamo-L	BGIBMGA003688	up	545	559	-	11.0726	6.09e-05	1	TAGGCGTATGACGTC
1788	mamo-L	BGIBMGA003689	up	1420	1434	-	11.3145	4.87e-05	1	TAGGCGTACTTTTTG
1789	mamo-L	BGIBMGA003690	up	1961	1975	-	12.1371	2.17e-05	1	TAGGCTTTAATTGAT
1790	mamo-L	BGIBMGA003692	up	884	898	+	10.8226	7.58e-05	1	TAGGCAGACGTTCAT
1791	mamo-L	BGIBMGA003693	down	1736	1750	+	11.2097	5.38e-05	1	TAGGCTCGGCTTTCT
1792	mamo-L	BGIBMGA003696	up	1357	1371	+	12.1935	2.05e-05	1	TAGGCTTAGTGTCTT
1793	mamo-L	BGIBMGA003699	up	806	820	+	12.2661	1.89e-05	1	TAGGCCTAGGTCCTT
1794	mamo-L	BGIBMGA003699	down	462	476	-	10.7823	7.84e-05	1	GAGGCTTTTGTTTTC
1795	mamo-L	BGIBMGA003700	down	439	453	+	12.3145	1.79e-05	1	TAGGCTATTGTTTTT
1796	mamo-L	BGIBMGA003700	up	1785	1799	+	10.5403	9.58e-05	1	TAGGCTGTATGGTGT
1797	mamo-L	BGIBMGA003703	down	162	176	+	11.5323	3.96e-05	1	TAGGCTTAAATTTGC
1798	mamo-L	BGIBMGA003703	down	1174	1188	+	10.5	9.9e-05	1	TAGGCAGGGTGTTGC
1799	mamo-L	BGIBMGA003706	down	1357	1371	+	10.9677	6.68e-05	1	TAGGCTGGTTCTGAC
1800	mamo-L	BGIBMGA003708	up	1621	1635	-	10.8468	7.42e-05	1	TAGGCATCGTTTGCC
1801	mamo-L	BGIBMGA003708	up	1020	1034	+	10.629	8.91e-05	1	TAGGCCGTGAGCTCT
1802	mamo-L	BGIBMGA003714	down	1750	1764	+	10.5726	9.33e-05	1	TAGGCTAATATTTAT
1803	mamo-L	BGIBMGA003715	up	1905	1919	+	12.3145	1.79e-05	1	GAGGCGGGGGTCGGT
1804	mamo-L	BGIBMGA003715	down	101	115	-	11.4677	4.22e-05	1	GAGGCCGGCGGTGAT
1805	mamo-L	BGIBMGA003715	up	1029	1043	+	10.9194	6.98e-05	1	GAGGCTGTAGGTGCT
1806	mamo-L	BGIBMGA003716	up	68	82	-	11.4032	4.49e-05	1	TAGGCCGAGCTTTAT
1807	mamo-L	BGIBMGA003720	up	1601	1615	+	13.2177	6.14e-06	1	TAGGCTTCCGTTGCC
1808	mamo-L	BGIBMGA003720	up	1158	1172	+	11.5242	3.99e-05	1	TAGGCTTTTGTAGTT
1809	mamo-L	BGIBMGA003721	up	1860	1874	+	12.2661	1.89e-05	1	AAGGCTGTTATTGGT
1810	mamo-L	BGIBMGA003722	up	1744	1758	-	14.6371	7.08e-07	1	TAGGCGGGGGTTTGT
1811	mamo-L	BGIBMGA003723	up	186	200	-	14.6371	7.08e-07	1	TAGGCGGGGGTTTGT
1812	mamo-L	BGIBMGA003729	up	1637	1651	-	12.7258	1.11e-05	1	TAGGCGTGCTTTGTA
1813	mamo-L	BGIBMGA003730	down	1215	1229	+	12.1452	2.15e-05	1	TAGGCAGGTGGTGGT
1814	mamo-L	BGIBMGA003735	down	884	898	-	11.4032	4.49e-05	1	TAGGCGGTTTGTAGT
1815	mamo-L	BGIBMGA003736	up	1244	1258	+	12.0565	2.36e-05	1	TAGGCAGATTTTTCT
1816	mamo-L	BGIBMGA003736	down	1387	1401	+	11.6855	3.42e-05	1	TAGGCTTGTTTCCTT
1817	mamo-L	BGIBMGA003737	up	459	473	+	11.6855	3.42e-05	1	TAGGCTTGTTTCCTT
1818	mamo-L	BGIBMGA003739	down	1360	1374	-	11.2661	5.1e-05	1	TAGGCAGGTTTTCGT
1819	mamo-L	BGIBMGA003739	down	1705	1719	+	10.9194	6.98e-05	1	TAGGCTACTTTTTTT
1820	mamo-L	BGIBMGA003743	down	1275	1289	+	10.7742	7.89e-05	1	TAGGCCCTCGCTTTT
1821	mamo-L	BGIBMGA003743	up	665	679	+	10.5726	9.33e-05	1	TAGGCTAATATTTAT
1822	mamo-L	BGIBMGA003747	down	1966	1980	+	10.5	9.9e-05	1	GAGGCCCAGGTCGTC
1823	mamo-L	BGIBMGA003749	down	231	245	+	10.9516	6.78e-05	1	TAGGCATTCTATTGT
1824	mamo-L	BGIBMGA003754	down	1285	1299	+	10.5	9.9e-05	1	GAGGCCCAGGTCGTC
1825	mamo-L	BGIBMGA003755	up	149	163	-	14.2661	1.33e-06	1	TAGGCTTGTGTTGTC
1826	mamo-L	BGIBMGA003755	down	122	136	+	11.129	5.79e-05	1	TAGGCTGCAGATTGT
1827	mamo-L	BGIBMGA003756	down	585	599	+	10.5484	9.52e-05	1	TGGGCGGGCTGTGGT
1828	mamo-L	BGIBMGA003757	down	602	616	+	11.4839	4.15e-05	1	GAGGCTTACGGTTGT
1829	mamo-L	BGIBMGA003757	down	1675	1689	+	10.5968	9.15e-05	1	AAGGCTGTTAATGCT
1830	mamo-L	BGIBMGA003767	up	254	268	-	12.7258	1.11e-05	1	TAGGCGTGCTTTGTA
1831	mamo-L	BGIBMGA003768	up	1358	1372	-	11.4516	4.28e-05	1	TAGGCTAATGTTGGG
1832	mamo-L	BGIBMGA003775	up	648	662	+	10.6129	9.03e-05	1	TAGGCGTTCGTTATA
1833	mamo-L	BGIBMGA003777	down	208	222	+	12.7016	1.14e-05	1	TAGGCTTGCTTTTAC
1834	mamo-L	BGIBMGA003779	up	916	930	-	11.7258	3.29e-05	1	AAGGCTATGTTTGTT
1835	mamo-L	BGIBMGA003784	up	1098	1112	-	11.1371	5.75e-05	1	AAGGCCGGTGTTTCC
1836	mamo-L	BGIBMGA003786	up	1920	1934	-	11.7661	3.16e-05	1	TAGGCGTATATGGTT
1837	mamo-L	BGIBMGA003786	down	1307	1321	+	11.7097	3.34e-05	1	TAGGCGGTGATTGCA
1838	mamo-L	BGIBMGA003791	up	49	63	+	12.8065	1.01e-05	1	TAGGCGGGTTTTTAT
1839	mamo-L	BGIBMGA003793	down	1502	1516	-	10.5726	9.33e-05	1	TAGGCTAATATTTAT
1840	mamo-L	BGIBMGA003795	up	1584	1598	+	11.2097	5.38e-05	1	TAGGCCTGTTTGTTC
1841	mamo-L	BGIBMGA003798	up	354	368	-	10.7661	7.95e-05	1	AAGGCGGAAATTGCT
1842	mamo-L	BGIBMGA003802	up	460	474	+	11.2177	5.34e-05	1	GAGGCGCTTTTTGCT
1843	mamo-L	BGIBMGA003804	up	681	695	-	11.1935	5.45e-05	1	GAGGCCGAGGTGGCC
1844	mamo-L	BGIBMGA003807	down	996	1010	-	10.5726	9.33e-05	1	TAGGCTAATATTTAT
1845	mamo-L	BGIBMGA003811	up	494	508	+	11.3548	4.69e-05	1	AAGGCTGATGATGAT
1846	mamo-L	BGIBMGA003813	down	623	637	+	11.5645	3.84e-05	1	TAGGCGCATGACGGT
1847	mamo-L	BGIBMGA003813	up	1945	1959	-	10.9274	6.92e-05	1	TAGGCTAGTTACGTT
1848	mamo-L	BGIBMGA003815	down	677	691	+	12.9839	8.17e-06	1	TAGGCTTTTTTTGGA
1849	mamo-L	BGIBMGA003818	up	706	720	-	13.3226	5.34e-06	1	TAGGCTTAGAATGTT
1850	mamo-L	BGIBMGA003818	down	1322	1336	+	10.9194	6.98e-05	1	TAGGCTACTTTTTTT
1851	mamo-L	BGIBMGA003818	up	634	648	-	10.8065	7.69e-05	1	TAGGCCGTATTTTGG
1852	mamo-L	BGIBMGA003821	down	1051	1065	-	11	6.5e-05	1	TAGGCATGCGTGTGT
1853	mamo-L	BGIBMGA003822	up	1085	1099	-	10.9516	6.78e-05	1	AAGGCTTCGTTTTTT
1854	mamo-L	BGIBMGA003823	up	188	202	-	10.5968	9.15e-05	1	GAGGCTAGTTTTTGT
1855	mamo-L	BGIBMGA003824	down	1349	1363	+	10.629	8.91e-05	1	TAGGCCTGCAGCGCC
1856	mamo-L	BGIBMGA003828	down	1387	1401	+	10.9194	6.98e-05	1	TAGGCTACTTTTTTT
1857	mamo-L	BGIBMGA003834	down	1445	1459	+	11.7016	3.37e-05	1	TAGGCGGGTTTTGAA
1858	mamo-L	BGIBMGA003839	down	773	787	-	10.5645	9.4e-05	1	TAGGCTGTATGCTCT
1859	mamo-L	BGIBMGA003840	down	634	648	+	10.5726	9.33e-05	1	TAGGCTAATATTTAT
1860	mamo-L	BGIBMGA003841	down	1113	1127	+	11	6.5e-05	1	AAGGCTTGTTTTATT
1861	mamo-L	BGIBMGA003842	up	220	234	-	12.0161	2.46e-05	1	TAGGCTTTCTTCTTC
1862	mamo-L	BGIBMGA003843	up	68	82	-	11.4113	4.45e-05	1	TAGGCGGGGTTGGCA
1863	mamo-L	BGIBMGA003843	up	1815	1829	-	10.5726	9.33e-05	1	TAGGCTAATATTTAT
1864	mamo-L	BGIBMGA003845	down	1473	1487	+	13.0726	7.34e-06	1	TAGGCTGGCTTTAAT
1865	mamo-L	BGIBMGA003850	down	1079	1093	+	10.6532	8.73e-05	1	TAGGCGAAGTTTAAT
1866	mamo-L	BGIBMGA003855	down	847	861	+	13.3952	4.84e-06	1	TAGGCGTAGGTTGAC
1867	mamo-L	BGIBMGA003861	up	129	143	+	10.9839	6.59e-05	1	AAGGCGTTTTTTTTT
1868	mamo-L	BGIBMGA003864	down	270	284	+	12.9919	8.1e-06	1	TAGGCCGGTTTTGCA
1869	mamo-L	BGIBMGA003864	down	353	367	-	10.8065	7.69e-05	1	GAGGCCGTCGTGGCC
1870	mamo-L	BGIBMGA003867	up	1124	1138	-	11.9597	2.61e-05	1	AAGGCTGTTTTTTTT
1871	mamo-L	BGIBMGA003869	down	129	143	-	11.621	3.63e-05	1	TAGGCTGTGAAGGCT
1872	mamo-L	BGIBMGA003874	down	1156	1170	+	10.8871	7.17e-05	1	TAGGCTACTTTTTCT
1873	mamo-L	BGIBMGA003877	down	1402	1416	+	10.5968	9.15e-05	1	TAGGCGAGTGGTGTC
1874	mamo-L	BGIBMGA003877	down	1523	1537	-	10.5	9.9e-05	1	GAGGCCCAGGTCGTC
1875	mamo-L	BGIBMGA003878	up	645	659	+	11.0323	6.32e-05	1	TAGGCGTGTAATGTC
1876	mamo-L	BGIBMGA003878	down	1129	1143	-	10.75	8.06e-05	1	GAGGCCGATTGTGCC
1877	mamo-L	BGIBMGA003878	down	1693	1707	+	10.6532	8.73e-05	1	AAGGCTTTTTTCGAT
1878	mamo-L	BGIBMGA003881	up	290	304	+	11.5645	3.84e-05	1	TAGGCCCAGGGTTAT
1879	mamo-L	BGIBMGA003883	down	170	184	+	11.371	4.62e-05	1	TAGGCTGTATAGGCT
1880	mamo-L	BGIBMGA003883	down	179	193	+	11.0242	6.36e-05	1	TAGGCTTACGCTCTT
1881	mamo-L	BGIBMGA003884	down	1554	1568	-	10.4919	9.96e-05	1	TAGGCTGTGTCTGTG
1882	mamo-L	BGIBMGA003885	up	493	507	+	10.8548	7.38e-05	1	GAGGCCTGTTTTTAT
1883	mamo-L	BGIBMGA003886	down	846	860	+	10.9113	7.02e-05	1	TAGGCTTTGTGCCGT
1884	mamo-L	BGIBMGA003886	down	1582	1596	+	10.7581	8e-05	1	TAGGCAGATAATGTT
1885	mamo-L	BGIBMGA003886	up	1674	1688	-	10.5242	9.7e-05	1	AAGGCCTGTGATTTT
1886	mamo-L	BGIBMGA003888	up	814	828	+	10.7258	8.23e-05	1	TAGGCCGTTTTATGT
1887	mamo-L	BGIBMGA003904	down	182	196	+	11.8871	2.81e-05	1	TAGGCCTTATTTATT
1888	mamo-L	BGIBMGA003904	down	540	554	-	10.9839	6.59e-05	1	TAGGCGAAGTGTTTT
1889	mamo-L	BGIBMGA003905	up	602	616	-	11.379	4.58e-05	1	TAGGCGGATTGTACT
1890	mamo-L	BGIBMGA003906	up	1434	1448	-	10.5645	9.4e-05	1	TGGGCCTTGTGTGGT
1891	mamo-L	BGIBMGA003908	up	1870	1884	-	11.3065	4.91e-05	1	TAGGCTGACGAGCGT
1892	mamo-L	BGIBMGA003913	down	761	775	-	11.1452	5.7e-05	1	TAGGCTGTGATAGTT
1893	mamo-L	BGIBMGA003913	down	718	732	-	10.8468	7.42e-05	1	TAGGCTGGTAGCTGT
1894	mamo-L	BGIBMGA003914	up	657	671	+	11.25	5.18e-05	1	GAGGCGGTTTTTTTT
1895	mamo-L	BGIBMGA003914	down	1165	1179	+	11.1613	5.63e-05	1	TAGGCTAAGTAGGCT
1896	mamo-L	BGIBMGA003916	down	1838	1852	-	11.25	5.18e-05	1	TAGGCCCATTTCAGT
1897	mamo-L	BGIBMGA003917	up	1981	1995	+	12.5323	1.39e-05	1	AAGGCTGATGTTGTC
1898	mamo-L	BGIBMGA003919	down	1607	1621	+	11.2258	5.3e-05	1	TAGGCCTTTTTCCCT
1899	mamo-L	BGIBMGA003920	up	1680	1694	-	10.5726	9.33e-05	1	TAGGCTAATATTTAT
1900	mamo-L	BGIBMGA003922	down	1401	1415	+	11.25	5.18e-05	1	TAGGCCCATTTCAGT
1901	mamo-L	BGIBMGA003923	down	1358	1372	+	11.1452	5.7e-05	1	TAGGCTGTGATAGTT
1902	mamo-L	BGIBMGA003923	down	1401	1415	+	10.8468	7.42e-05	1	TAGGCTGGTAGCTGT
1903	mamo-L	BGIBMGA003924	up	962	976	-	10.5081	9.83e-05	1	AAGGCTCTCGTTTTC
1904	mamo-L	BGIBMGA003926	down	1431	1445	-	11.8952	2.79e-05	1	AAGGCCGTTTTTGTC
1905	mamo-L	BGIBMGA003927	up	105	119	+	10.5726	9.33e-05	1	TAGGCTAATATTTAT
1906	mamo-L	BGIBMGA003929	up	1823	1837	+	12.0484	2.38e-05	1	AAGGCTAAGTTTGTT
1907	mamo-L	BGIBMGA003930	down	1729	1743	+	12.0484	2.38e-05	1	AAGGCTAAGTTTGTT
1908	mamo-L	BGIBMGA003932	down	1048	1062	-	12.7258	1.11e-05	1	AAGGCTGATGTTTGT
1909	mamo-L	BGIBMGA003932	down	1482	1496	-	10.7903	7.79e-05	1	TAGGCGATGTTCTTT
1910	mamo-L	BGIBMGA003937	up	1553	1567	-	11.9355	2.67e-05	1	TAGGCGCGCAGTGGT
1911	mamo-L	BGIBMGA003938	up	1934	1948	+	10.879	7.22e-05	1	TAGGCGCGCGACTGT
1912	mamo-L	BGIBMGA003940	up	623	637	+	12.9839	8.17e-06	1	TAGGCTAGGTTTTTT
1913	mamo-L	BGIBMGA003941	down	1608	1622	-	11.129	5.79e-05	1	TAGGCTGGTGGTACC
1914	mamo-L	BGIBMGA003947	down	740	754	-	11.371	4.62e-05	1	TAGGCTGTATAGGCT
1915	mamo-L	BGIBMGA003951	down	1933	1947	+	11.121	5.84e-05	1	TAGGCTTAATTCATT
1916	mamo-L	BGIBMGA003952	down	1484	1498	-	12.1855	2.06e-05	1	TAGGCTATTTTTTTT
1917	mamo-L	BGIBMGA003954	down	1307	1321	+	11.371	4.62e-05	1	TAGGCTGTATAGGCT
1918	mamo-L	BGIBMGA003956	up	819	833	+	11.5726	3.81e-05	1	TAGGCTTTTTTTTTA
1919	mamo-L	BGIBMGA003956	up	1659	1673	+	10.9194	6.98e-05	1	TAGGCTACTTTTTTT
1920	mamo-L	BGIBMGA003956	up	1388	1402	+	10.6935	8.45e-05	1	AAGGCTGCTTTTTTT
1921	mamo-L	BGIBMGA003957	down	124	138	-	12.0968	2.26e-05	1	TAGGCTTGGTTGTAT
1922	mamo-L	BGIBMGA003959	down	1850	1864	+	10.5968	9.15e-05	1	GAGGCTAGTTTTTGT
1923	mamo-L	BGIBMGA003960	down	1935	1949	-	11.25	5.18e-05	1	AAGGCTGCGTTTTTT
1924	mamo-L	BGIBMGA003960	up	1949	1963	+	10.9032	7.07e-05	1	AAGGCTGTTTTTCTT
1925	mamo-L	BGIBMGA003961	down	1171	1185	-	12.5	1.44e-05	1	TAGGCTTAGGACTGT
1926	mamo-L	BGIBMGA003962	down	1861	1875	-	12.7258	1.11e-05	1	TAGGCTGTGTAGGCT
1927	mamo-L	BGIBMGA003962	down	1236	1250	-	11.2177	5.34e-05	1	TAGGCCTCATGTGTT
1928	mamo-L	BGIBMGA003964	up	1333	1347	-	13.4677	4.39e-06	1	TAGGCTGATGATGAT
1929	mamo-L	BGIBMGA003965	down	854	868	-	11.2903	4.99e-05	1	TAGGCATAGGTTGGG
1930	mamo-L	BGIBMGA003965	up	707	721	-	10.5323	9.63e-05	1	AAGGCCCAGGTCGTC
1931	mamo-L	BGIBMGA003966	up	1101	1115	+	11.6774	3.44e-05	1	TAGGCATGTTTTTCT
1932	mamo-L	BGIBMGA003969	down	1479	1493	+	13.7742	2.79e-06	1	TAGGCGGGTGGTGGT
1933	mamo-L	BGIBMGA003970	down	571	585	-	10.9194	6.98e-05	1	TAGGCTACTTTTTTT
1934	mamo-L	BGIBMGA003971	down	78	92	-	13.129	6.83e-06	1	TAGGCTGTCCTTGTT
1935	mamo-L	BGIBMGA003972	down	1762	1776	-	10.9597	6.73e-05	1	AAGGCTTTCGATTTT
1936	mamo-L	BGIBMGA003972	down	866	880	+	10.8548	7.38e-05	1	TAGGCTTACTACGCA
1937	mamo-L	BGIBMGA003974	up	424	438	-	10.6048	9.09e-05	1	AAGGCTGAAGTTTCC
1938	mamo-L	BGIBMGA003975	up	86	100	+	11	6.5e-05	1	TAGGCTTATAGTAGT
1939	mamo-L	BGIBMGA003976	up	244	258	+	10.7823	7.84e-05	1	AAGGCTGACAATGGC
1940	mamo-L	BGIBMGA003980	up	217	231	-	10.8226	7.58e-05	1	TAGGCAGTCTGTTCT
1941	mamo-L	BGIBMGA003980	down	62	76	+	10.5726	9.33e-05	1	TAGGCTAATATTTAT
1942	mamo-L	BGIBMGA003981	up	1875	1889	+	12.7581	1.07e-05	1	AAGGCTTTTTTTGTT
1943	mamo-L	BGIBMGA003981	down	160	174	+	10.5242	9.7e-05	1	TAGGCGTTGTATTAC
1944	mamo-L	BGIBMGA003982	down	1824	1838	+	11.1855	5.5e-05	1	TGGGCTTAGTTTGTC
1945	mamo-L	BGIBMGA003983	up	696	710	+	10.5968	9.15e-05	1	GAGGCCGTTGTCTTT
1946	mamo-L	BGIBMGA003990	down	1896	1910	+	11.5726	3.81e-05	1	TAGGCTTTAGTTGCG
1947	mamo-L	BGIBMGA003996	up	824	838	+	11.1613	5.63e-05	1	TAGGCGTTCAATTTT
1948	mamo-L	BGIBMGA004001	down	1588	1602	+	12.1371	2.17e-05	1	TAGGCTGTTGTAGGT
1949	mamo-L	BGIBMGA004001	down	27	41	+	11.1371	5.75e-05	1	TAGGCTGTCTTTTAG
1950	mamo-L	BGIBMGA004003	up	1059	1073	+	10.7823	7.84e-05	1	TAGGCCCGTGATCTT
1951	mamo-L	BGIBMGA004004	up	1603	1617	+	13.7742	2.79e-06	1	TAGGCTTTTTTTTTT
1952	mamo-L	BGIBMGA004005	down	1649	1663	-	10.5726	9.33e-05	1	TAGGCTAATATTTAT
1953	mamo-L	BGIBMGA004007	up	828	842	-	10.9194	6.98e-05	1	AAGGCTTGTATTGTC
1954	mamo-L	BGIBMGA004012	up	825	839	+	10.7177	8.28e-05	1	TAGGCTTAATTGACT
1955	mamo-L	BGIBMGA004013	up	95	109	-	10.9194	6.98e-05	1	TAGGCTACTTTTTTT
1956	mamo-L	BGIBMGA004016	down	1372	1386	-	12.1452	2.15e-05	1	TAGGCAGGTGGTGGT
1957	mamo-L	BGIBMGA004020	up	963	977	+	11.371	4.62e-05	1	TAGGCCTATAGTTCT
1958	mamo-L	BGIBMGA004021	down	1797	1811	-	10.6371	8.85e-05	1	AAGGCGTAAGTTTTT
1959	mamo-L	BGIBMGA004022	down	877	891	-	10.5726	9.33e-05	1	GAGGCCGACGGTGAC
1960	mamo-L	BGIBMGA004024	up	1727	1741	-	11.7339	3.26e-05	1	TAGGCCGTCGTCGTG
1961	mamo-L	BGIBMGA004028	up	383	397	-	11.0403	6.28e-05	1	AAGGCCCGTTTTGTC
1962	mamo-L	BGIBMGA004029	up	708	722	+	11.5403	3.93e-05	1	GAGGCGGATTTTTCT
1963	mamo-L	BGIBMGA004029	down	1143	1157	-	10.5	9.9e-05	1	AAGGCCATATTTGGT
1964	mamo-L	BGIBMGA004030	down	1819	1833	-	12.4677	1.49e-05	1	TAGGCTTCTATTGCT
1965	mamo-L	BGIBMGA004030	down	1552	1566	-	12.0645	2.34e-05	1	TAGGCGGGCTTCGGA
1966	mamo-L	BGIBMGA004032	up	1432	1446	-	11.3548	4.69e-05	1	AAGGCTGATGATGAT
1967	mamo-L	BGIBMGA004035	down	1073	1087	+	11.7903	3.08e-05	1	TAGGCTGAATTTTAC
1968	mamo-L	BGIBMGA004038	up	1032	1046	+	11.5323	3.96e-05	1	TAGGCGTGAGGTGAT
1969	mamo-L	BGIBMGA004039	up	862	876	+	11.0484	6.23e-05	1	AAGGCGGGCTGTGGC
1970	mamo-L	BGIBMGA004040	down	1043	1057	-	12.1935	2.05e-05	1	GAGGCTTTGTGTGGT
1971	mamo-L	BGIBMGA004044	down	738	752	-	10.7097	8.33e-05	1	TAGGCAAAGGTCGTT
1972	mamo-L	BGIBMGA004046	up	1533	1547	+	10.5242	9.7e-05	1	TAGGCTGCTTACTGT
1973	mamo-L	BGIBMGA004048	up	1272	1286	+	11.3065	4.91e-05	1	AAGGCGCACATTGGT
1974	mamo-L	BGIBMGA004048	down	883	897	-	10.8548	7.38e-05	1	GAGGCCTGTTTTTAT
1975	mamo-L	BGIBMGA004050	up	1524	1538	+	11.2984	4.95e-05	1	GAGGCCTAGGTCGTC
1976	mamo-L	BGIBMGA004051	down	1550	1564	-	10.8226	7.58e-05	1	TAGGCGTGATTTCGC
1977	mamo-L	BGIBMGA004065	down	140	154	+	11.8065	3.03e-05	1	AAGGCTTGTGATGTT
1978	mamo-L	BGIBMGA004070	up	910	924	-	11.2823	5.03e-05	1	AAGGCTTATGTTTAT
1979	mamo-L	BGIBMGA004072	down	1265	1279	-	10.6613	8.67e-05	1	AAGGCCGGTTATTCT
1980	mamo-L	BGIBMGA004073	up	1166	1180	-	10.6613	8.67e-05	1	AAGGCCGGTTATTCT
1981	mamo-L	BGIBMGA004076	down	1803	1817	-	10.8952	7.12e-05	1	TAGGCTGTAATCTTT
1982	mamo-L	BGIBMGA004087	up	1399	1413	+	12.6532	1.2e-05	1	TAGGCAGGGTATGGT
1983	mamo-L	BGIBMGA004087	down	1535	1549	-	12.5726	1.33e-05	1	TAGGCCCGGATTGCC
1984	mamo-L	BGIBMGA004087	down	195	209	-	12.4597	1.51e-05	1	TAGGCTGTCGGTTAT
1985	mamo-L	BGIBMGA004088	up	1395	1409	-	11.5484	3.9e-05	1	TAGGCCAATGTTATT
1986	mamo-L	BGIBMGA004090	down	1191	1205	+	11.3306	4.8e-05	1	TAGGCCTAGTTTACA
1987	mamo-L	BGIBMGA004093	up	1692	1706	-	12.2742	1.87e-05	1	TAGGCGAATGTTTGT
1988	mamo-L	BGIBMGA004096	up	394	408	+	11.0887	6.01e-05	1	TAGGCTTTATTTCAT
1989	mamo-L	BGIBMGA004098	up	268	282	-	11.371	4.62e-05	1	TAGGCCTATAGTTCT
1990	mamo-L	BGIBMGA004100	down	1264	1278	+	12.0645	2.34e-05	1	TAGGCGGGCTTCGGA
1991	mamo-L	BGIBMGA004104	down	1386	1400	+	11.0968	5.97e-05	1	TAGGCTGTAGGTATT
1992	mamo-L	BGIBMGA004108	up	1515	1529	+	11.6532	3.53e-05	1	TAGGCCTGCATTAGC
1993	mamo-L	BGIBMGA004112	up	1482	1496	-	12.0081	2.48e-05	1	TAGGCAGGTTTTTTT
1994	mamo-L	BGIBMGA004122	up	1149	1163	-	11	6.5e-05	1	TAGGCATGCGTGTGT
1995	mamo-L	BGIBMGA004127	up	453	467	-	11.1613	5.63e-05	1	TAGGCGTTCAATTTT
1996	mamo-L	BGIBMGA004128	down	832	846	-	10.5081	9.83e-05	1	TAGGCACAATTTTGT
1997	mamo-L	BGIBMGA004129	up	851	865	-	10.6855	8.51e-05	1	TCGGCGTGGTTTGCT
1998	mamo-L	BGIBMGA004132	up	331	345	+	10.5726	9.33e-05	1	TAGGCTAATATTTAT
[truncated: 5,128 more rows]
