# Supplementary material for: The BTB-ZF gene Bm-mamo regulates pigmentation in silkworm caterpillars
Source: eLife. 2024 Apr 8;12:RP90795. doi: 10.7554/eLife.90795 (PMC11001300; doi:10.7554/eLife.90795)
Supplement: Supplementary file 4. — The position weight matrix of the mamo-s protein was used to search for 2000 base pair regions upstream and downstream of the predicted silkworm gene. [file elife-90795-supp4.xlsx]

## Sheet: Sheet1
Supplementary Table S4. The binding site analysis of Bm-mamo-s
Number	motif_id	gene ID	up/down stream	start	stop	strand	score	p-value	q-value	matched_sequence
1	mamo-s	BGIBMGA000001	down	684	692	-	11.3303	4.96e-05	0.615	GTGGGTGGC
2	mamo-s	BGIBMGA000004	down	235	243	+	11.3303	4.96e-05	0.615	GTGGGTGGC
3	mamo-s	BGIBMGA000006	up	300	308	+	10.9358	7.3e-05	0.728	GCGGGTGGC
4	mamo-s	BGIBMGA000007	down	1840	1848	+	10.9358	7.3e-05	0.728	GCGGGTGGC
5	mamo-s	BGIBMGA000009	down	1398	1406	-	11.3303	4.96e-05	0.615	GTGGGTGGC
6	mamo-s	BGIBMGA000012	up	1435	1443	+	11.3303	4.96e-05	0.615	GTGGGTGGC
7	mamo-s	BGIBMGA000013	up	484	492	+	11.3303	4.96e-05	0.615	GTGGGTGGC
8	mamo-s	BGIBMGA000013	down	829	837	+	11.3303	4.96e-05	0.615	GTGGGTGGC
9	mamo-s	BGIBMGA000013	down	1549	1557	+	11.3303	4.96e-05	0.615	GTGGGTGGC
10	mamo-s	BGIBMGA000014	down	1388	1396	+	11.3303	4.96e-05	0.615	GTGGGTGGC
11	mamo-s	BGIBMGA000014	up	1872	1880	+	10.5413	9.42e-05	0.857	CAGCGTGTC
12	mamo-s	BGIBMGA000016	down	511	519	+	11.2844	5.18e-05	0.63	CTGCGTGCC
13	mamo-s	BGIBMGA000018	down	1291	1299	+	11.3303	4.96e-05	0.615	GTGGGTGGC
14	mamo-s	BGIBMGA000019	up	1023	1031	-	11.3303	4.96e-05	0.615	GTGGGTGGC
15	mamo-s	BGIBMGA000020	up	368	376	+	14.055	2.23e-06	0.615	GTGCGTGGC
16	mamo-s	BGIBMGA000020	down	251	259	+	11.3303	4.96e-05	0.615	GTGGGTGGC
17	mamo-s	BGIBMGA000021	up	1499	1507	+	11.3303	4.96e-05	0.615	GTGGGTGGC
18	mamo-s	BGIBMGA000024	up	1873	1881	-	11.1376	6.35e-05	0.709	TCGCGTGGC
19	mamo-s	BGIBMGA000025	up	1450	1458	+	14.055	2.23e-06	0.615	GTGCGTGGC
20	mamo-s	BGIBMGA000025	up	513	521	-	12.1284	2.16e-05	0.615	CAGCGTGGC
21	mamo-s	BGIBMGA000025	down	148	156	+	11.3303	4.96e-05	0.615	GTGGGTGGC
22	mamo-s	BGIBMGA000026	down	936	944	-	11.3303	4.96e-05	0.615	GTGGGTGGC
23	mamo-s	BGIBMGA000026	up	1571	1579	-	11.0826	6.84e-05	0.709	GTACGTGGC
24	mamo-s	BGIBMGA000027	down	1480	1488	-	10.5688	8.88e-05	0.824	GTGCGTGAC
25	mamo-s	BGIBMGA000028	down	312	320	-	11.3303	4.96e-05	0.615	GTGGGTGGC
26	mamo-s	BGIBMGA000028	up	591	599	-	11.3303	4.96e-05	0.615	GTGGGTGGC
27	mamo-s	BGIBMGA000030	up	487	495	-	11.3303	4.96e-05	0.615	GTGGGTGGC
28	mamo-s	BGIBMGA000033	down	391	399	-	12.0734	2.66e-05	0.615	GCGCGTGTC
29	mamo-s	BGIBMGA000036	up	1509	1517	+	11.3303	4.96e-05	0.615	GTGGGTGGC
30	mamo-s	BGIBMGA000036	up	1873	1881	-	11.1376	6.35e-05	0.709	TCGCGTGGC
31	mamo-s	BGIBMGA000038	up	1503	1511	+	11.3303	4.96e-05	0.615	GTGGGTGGC
32	mamo-s	BGIBMGA000039	up	285	293	+	11.3303	4.96e-05	0.615	GTGGGTGGC
33	mamo-s	BGIBMGA000041	down	1974	1982	-	11.7064	3.52e-05	0.615	GCGCGTGGT
34	mamo-s	BGIBMGA000041	up	42	50	-	11.3303	4.96e-05	0.615	GTGGGTGGC
35	mamo-s	BGIBMGA000044	up	1337	1345	-	10.5413	9.42e-05	0.857	CAGCGTGTC
36	mamo-s	BGIBMGA000045	up	1927	1935	-	11.1376	6.35e-05	0.709	TCGCGTGGC
37	mamo-s	BGIBMGA000048	down	1646	1654	+	12.1009	2.43e-05	0.615	GTGCGTGGT
38	mamo-s	BGIBMGA000048	up	1729	1737	+	11.7064	3.52e-05	0.615	GCGCGTGGT
39	mamo-s	BGIBMGA000048	up	994	1002	+	11.3303	4.96e-05	0.615	GTGGGTGGC
40	mamo-s	BGIBMGA000049	up	762	770	+	12.1009	2.43e-05	0.615	GTGCGTGGT
41	mamo-s	BGIBMGA000049	down	198	206	-	10.9358	7.3e-05	0.728	GCGGGTGGC
42	mamo-s	BGIBMGA000050	up	410	418	+	11.3303	4.96e-05	0.615	GTGGGTGGC
43	mamo-s	BGIBMGA000050	up	595	603	-	11.156	6.13e-05	0.705	GAGCGTGCC
44	mamo-s	BGIBMGA000051	up	811	819	+	11.3303	4.96e-05	0.615	GTGGGTGGC
45	mamo-s	BGIBMGA000051	up	1175	1183	+	11.3303	4.96e-05	0.615	GTGGGTGGC
46	mamo-s	BGIBMGA000054	down	1865	1873	-	10.7523	8.38e-05	0.797	GGGCGTGTC
47	mamo-s	BGIBMGA000059	down	1486	1494	+	11.3303	4.96e-05	0.615	GTGGGTGGC
48	mamo-s	BGIBMGA000062	down	667	675	+	11.3303	4.96e-05	0.615	GTGGGTGGC
49	mamo-s	BGIBMGA000062	down	250	258	-	10.5413	9.42e-05	0.857	GTGCGAGTC
50	mamo-s	BGIBMGA000064	down	1792	1800	+	13.6606	4.06e-06	0.615	GCGCGTGGC
51	mamo-s	BGIBMGA000064	down	1383	1391	-	11.3303	4.96e-05	0.615	GTGGGTGGC
52	mamo-s	BGIBMGA000065	up	827	835	+	11.0826	6.84e-05	0.709	GTACGTGGC
53	mamo-s	BGIBMGA000066	up	1508	1516	+	10.8073	7.89e-05	0.766	CCGCGTGGT
54	mamo-s	BGIBMGA000068	up	218	226	-	11.3303	4.96e-05	0.615	GTGGGTGGC
55	mamo-s	BGIBMGA000068	up	1204	1212	+	11.1743	5.9e-05	0.684	CCGCGTGTC
56	mamo-s	BGIBMGA000071	down	1845	1853	+	11.7064	3.52e-05	0.615	GCGCGTGGT
57	mamo-s	BGIBMGA000071	up	614	622	-	10.5413	9.42e-05	0.857	CAGCGTGTC
58	mamo-s	BGIBMGA000072	down	884	892	-	12.1835	1.71e-05	0.615	GTGCGTGCC
59	mamo-s	BGIBMGA000073	down	217	225	+	11.3303	4.96e-05	0.615	GTGGGTGGC
60	mamo-s	BGIBMGA000073	up	1812	1820	-	11.3303	4.96e-05	0.615	GTGGGTGGC
61	mamo-s	BGIBMGA000073	up	408	416	-	11.1743	5.9e-05	0.684	CCGCGTGTC
62	mamo-s	BGIBMGA000078	up	1694	1702	-	11.3303	4.96e-05	0.615	GTGGGTGGC
63	mamo-s	BGIBMGA000079	down	777	785	-	11.3303	4.96e-05	0.615	GTGGGTGGC
64	mamo-s	BGIBMGA000079	down	1317	1325	+	11.3303	4.96e-05	0.615	GTGGGTGGC
65	mamo-s	BGIBMGA000082	down	1971	1979	-	11.3303	4.96e-05	0.615	GTGGGTGGC
66	mamo-s	BGIBMGA000083	up	1214	1222	+	14.055	2.23e-06	0.615	GTGCGTGGC
67	mamo-s	BGIBMGA000083	down	147	155	-	11.0826	6.84e-05	0.709	GTACGTGGC
68	mamo-s	BGIBMGA000085	up	1828	1836	-	10.8073	7.89e-05	0.766	CCGCGTGGT
69	mamo-s	BGIBMGA000089	up	282	290	-	11.3303	4.96e-05	0.615	GTGGGTGGC
70	mamo-s	BGIBMGA000089	down	647	655	+	10.9358	7.3e-05	0.728	GCGGGTGGC
71	mamo-s	BGIBMGA000090	up	1530	1538	+	11.3303	4.96e-05	0.615	GTGGGTGGC
72	mamo-s	BGIBMGA000091	up	497	505	+	11.0826	6.84e-05	0.709	GTACGTGGC
73	mamo-s	BGIBMGA000092	down	1928	1936	-	10.8073	7.89e-05	0.766	CCGCGTGGT
74	mamo-s	BGIBMGA000093	up	1340	1348	+	11.3303	4.96e-05	0.615	GTGGGTGGC
75	mamo-s	BGIBMGA000094	down	1139	1147	-	11.3303	4.96e-05	0.615	GTGGGTGGC
76	mamo-s	BGIBMGA000094	up	1389	1397	+	11.3303	4.96e-05	0.615	GTGGGTGGC
77	mamo-s	BGIBMGA000095	up	220	228	-	12.3394	1.49e-05	0.615	GGGCGTGGC
78	mamo-s	BGIBMGA000095	down	875	883	-	10.9358	7.3e-05	0.728	GCGGGTGGC
79	mamo-s	BGIBMGA000097	down	386	394	-	13.0275	8.53e-06	0.615	GAGCGTGGC
80	mamo-s	BGIBMGA000098	down	1849	1857	+	12.1009	2.43e-05	0.615	GTGCGTGGT
81	mamo-s	BGIBMGA000104	down	1180	1188	+	11.3303	4.96e-05	0.615	GTGGGTGGC
82	mamo-s	BGIBMGA000106	up	1814	1822	+	11.3303	4.96e-05	0.615	GTGGGTGGC
83	mamo-s	BGIBMGA000108	down	900	908	+	10.9358	7.3e-05	0.728	GCGGGTGGC
84	mamo-s	BGIBMGA000109	down	1887	1895	-	11.3303	4.96e-05	0.615	GTGGGTGGC
85	mamo-s	BGIBMGA000110	up	1514	1522	+	11.3303	4.96e-05	0.615	GTGGGTGGC
86	mamo-s	BGIBMGA000113	down	294	302	-	11.3303	4.96e-05	0.615	GTGGGTGGC
87	mamo-s	BGIBMGA000114	down	1349	1357	-	11.7798	3.11e-05	0.615	ATGCGTGGC
88	mamo-s	BGIBMGA000115	down	167	175	-	11.3303	4.96e-05	0.615	GTGGGTGGC
89	mamo-s	BGIBMGA000115	down	1185	1193	-	10.7523	8.38e-05	0.797	AAGCGTGGC
90	mamo-s	BGIBMGA000116	down	191	199	+	11.3303	4.96e-05	0.615	GTGGGTGGC
91	mamo-s	BGIBMGA000116	down	484	492	-	10.5138	9.75e-05	0.865	GTGCGTGTT
92	mamo-s	BGIBMGA000117	up	1667	1675	+	12.3394	1.49e-05	0.615	GGGCGTGGC
93	mamo-s	BGIBMGA000117	up	1719	1727	+	11.3303	4.96e-05	0.615	GTGGGTGGC
94	mamo-s	BGIBMGA000119	down	542	550	-	11.3303	4.96e-05	0.615	GTGGGTGGC
95	mamo-s	BGIBMGA000119	up	379	387	+	11.0826	6.84e-05	0.709	GTACGTGGC
96	mamo-s	BGIBMGA000121	up	1198	1206	-	11.3303	4.96e-05	0.615	GTGGGTGGC
97	mamo-s	BGIBMGA000121	up	560	568	-	10.8349	7.66e-05	0.751	CCGCGAGGC
98	mamo-s	BGIBMGA000123	up	1786	1794	-	11.3303	4.96e-05	0.615	GTGGGTGGC
99	mamo-s	BGIBMGA000125	up	1718	1726	+	11.3303	4.96e-05	0.615	GTGGGTGGC
100	mamo-s	BGIBMGA000126	up	244	252	-	11.3303	4.96e-05	0.615	GTGGGTGGC
101	mamo-s	BGIBMGA000129	up	101	109	+	11.3303	4.96e-05	0.615	GTGGGTGGC
102	mamo-s	BGIBMGA000129	up	931	939	-	11.3303	4.96e-05	0.615	GTGGGTGGC
103	mamo-s	BGIBMGA000130	down	242	250	+	10.9358	7.3e-05	0.728	GCGGGTGGC
104	mamo-s	BGIBMGA000136	down	1327	1335	+	10.5688	8.88e-05	0.824	GTGCGTGAC
105	mamo-s	BGIBMGA000137	up	453	461	-	11.3303	4.96e-05	0.615	GTGGGTGGC
106	mamo-s	BGIBMGA000138	down	156	164	-	11.3303	4.96e-05	0.615	GTGGGTGGC
107	mamo-s	BGIBMGA000140	down	1577	1585	+	11.3303	4.96e-05	0.615	GTGGGTGGC
108	mamo-s	BGIBMGA000142	down	872	880	+	11.3303	4.96e-05	0.615	GTGGGTGGC
109	mamo-s	BGIBMGA000142	up	1004	1012	-	11.3303	4.96e-05	0.615	GTGGGTGGC
110	mamo-s	BGIBMGA000143	up	1902	1910	+	11.3303	4.96e-05	0.615	GTGGGTGGC
111	mamo-s	BGIBMGA000144	down	1674	1682	+	12.3394	1.49e-05	0.615	GGGCGTGGC
112	mamo-s	BGIBMGA000147	down	84	92	-	11.1009	6.57e-05	0.709	GAGCGAGGC
113	mamo-s	BGIBMGA000148	up	103	111	-	11.1009	6.57e-05	0.709	GAGCGAGGC
114	mamo-s	BGIBMGA000149	up	1176	1184	-	11.4404	4.51e-05	0.615	CGGCGTGGC
115	mamo-s	BGIBMGA000149	down	1286	1294	+	11.3303	4.96e-05	0.615	GTGGGTGGC
116	mamo-s	BGIBMGA000150	up	14	22	+	11.3303	4.96e-05	0.615	GTGGGTGGC
117	mamo-s	BGIBMGA000150	up	1294	1302	-	11.3303	4.96e-05	0.615	GTGGGTGGC
118	mamo-s	BGIBMGA000152	up	751	759	+	11.2844	5.18e-05	0.63	CTGCGTGCC
119	mamo-s	BGIBMGA000153	down	1184	1192	+	11.3303	4.96e-05	0.615	GTGGGTGGC
120	mamo-s	BGIBMGA000154	down	904	912	+	11.3303	4.96e-05	0.615	GTGGGTGGC
121	mamo-s	BGIBMGA000155	down	1733	1741	-	11.3303	4.96e-05	0.615	GTGGGTGGC
122	mamo-s	BGIBMGA000157	down	1258	1266	+	11.3303	4.96e-05	0.615	GTGGGTGGC
123	mamo-s	BGIBMGA000161	up	685	693	+	11.3303	4.96e-05	0.615	GTGGGTGGC
124	mamo-s	BGIBMGA000161	up	1074	1082	-	10.9358	7.3e-05	0.728	GCGGGTGGC
125	mamo-s	BGIBMGA000163	down	1258	1266	-	11.3303	4.96e-05	0.615	GTGGGTGGC
126	mamo-s	BGIBMGA000164	down	845	853	-	11.7798	3.11e-05	0.615	ATGCGTGGC
127	mamo-s	BGIBMGA000164	up	1257	1265	-	11.3303	4.96e-05	0.615	GTGGGTGGC
128	mamo-s	BGIBMGA000164	up	775	783	+	11.0734	7.12e-05	0.726	GAGCGTGGT
129	mamo-s	BGIBMGA000165	up	1585	1593	-	11.7798	3.11e-05	0.615	ATGCGTGGC
130	mamo-s	BGIBMGA000166	up	231	239	+	11.3303	4.96e-05	0.615	GTGGGTGGC
131	mamo-s	BGIBMGA000166	down	1349	1357	+	11.3303	4.96e-05	0.615	GTGGGTGGC
132	mamo-s	BGIBMGA000166	down	648	656	-	10.5688	8.88e-05	0.824	GTGCGTGAC
133	mamo-s	BGIBMGA000168	up	957	965	-	13.6606	4.06e-06	0.615	GCGCGTGGC
134	mamo-s	BGIBMGA000169	up	1432	1440	+	12.1284	2.16e-05	0.615	GTGCGAGGC
135	mamo-s	BGIBMGA000169	down	1971	1979	-	11.3303	4.96e-05	0.615	GTGGGTGGC
136	mamo-s	BGIBMGA000169	down	777	785	-	10.5688	8.88e-05	0.824	GTGCGTGAC
137	mamo-s	BGIBMGA000169	up	1237	1245	+	10.5138	9.75e-05	0.865	GTGCGTGTT
138	mamo-s	BGIBMGA000170	down	1647	1655	+	11.3303	4.96e-05	0.615	GTGGGTGGC
139	mamo-s	BGIBMGA000171	up	1408	1416	-	11.3303	4.96e-05	0.615	GTGGGTGGC
140	mamo-s	BGIBMGA000172	down	690	698	+	11.3303	4.96e-05	0.615	GTGGGTGGC
141	mamo-s	BGIBMGA000174	down	958	966	+	11.3303	4.96e-05	0.615	GTGGGTGGC
142	mamo-s	BGIBMGA000175	up	153	161	+	11.4404	4.51e-05	0.615	GAGCGTGTC
143	mamo-s	BGIBMGA000179	down	1816	1824	+	11.3303	4.96e-05	0.615	GTGGGTGGC
144	mamo-s	BGIBMGA000179	up	1988	1996	+	10.5413	9.42e-05	0.857	CAGCGTGTC
145	mamo-s	BGIBMGA000181	up	574	582	+	11.3303	4.96e-05	0.615	GTGGGTGGC
146	mamo-s	BGIBMGA000181	down	1597	1605	-	11.3303	4.96e-05	0.615	GTGGGTGGC
147	mamo-s	BGIBMGA000182	down	508	516	-	11.1376	6.35e-05	0.709	TCGCGTGGC
148	mamo-s	BGIBMGA000183	up	251	259	+	11.3303	4.96e-05	0.615	GTGGGTGGC
149	mamo-s	BGIBMGA000183	up	1236	1244	-	11.3303	4.96e-05	0.615	GTGGGTGGC
150	mamo-s	BGIBMGA000183	down	1374	1382	-	11.3303	4.96e-05	0.615	GTGGGTGGC
151	mamo-s	BGIBMGA000184	up	704	712	+	11.3303	4.96e-05	0.615	GTGGGTGGC
152	mamo-s	BGIBMGA000184	down	1106	1114	-	11.3303	4.96e-05	0.615	GTGGGTGGC
153	mamo-s	BGIBMGA000188	up	1089	1097	-	11.3303	4.96e-05	0.615	GTGGGTGGC
154	mamo-s	BGIBMGA000188	down	1769	1777	+	11.2018	5.68e-05	0.674	CTGCGTGGT
155	mamo-s	BGIBMGA000190	up	420	428	+	11.3303	4.96e-05	0.615	GTGGGTGGC
156	mamo-s	BGIBMGA000191	down	349	357	+	11.3303	4.96e-05	0.615	GTGGGTGGC
157	mamo-s	BGIBMGA000191	down	1959	1967	-	11.2844	5.18e-05	0.63	CTGCGTGCC
158	mamo-s	BGIBMGA000193	up	202	210	-	11.3303	4.96e-05	0.615	GTGGGTGGC
159	mamo-s	BGIBMGA000193	down	1257	1265	+	11.3303	4.96e-05	0.615	GTGGGTGGC
160	mamo-s	BGIBMGA000193	up	1611	1619	+	11.2844	5.18e-05	0.63	CTGCGTGCC
161	mamo-s	BGIBMGA000194	up	241	249	-	13.0275	8.53e-06	0.615	GAGCGTGGC
162	mamo-s	BGIBMGA000196	down	878	886	-	11.2018	5.68e-05	0.674	CTGCGTGGT
163	mamo-s	BGIBMGA000197	down	1387	1395	+	11.3303	4.96e-05	0.615	GTGGGTGGC
164	mamo-s	BGIBMGA000199	up	19	27	+	11.3303	4.96e-05	0.615	GTGGGTGGC
165	mamo-s	BGIBMGA000200	up	780	788	+	11.3853	4.74e-05	0.615	ACGCGTGGC
166	mamo-s	BGIBMGA000201	up	663	671	+	11.3303	4.96e-05	0.615	GTGGGTGGC
167	mamo-s	BGIBMGA000202	up	141	149	+	11.3303	4.96e-05	0.615	GTGGGTGGC
168	mamo-s	BGIBMGA000203	up	206	214	+	11.1009	6.57e-05	0.709	GAGCGAGGC
169	mamo-s	BGIBMGA000204	up	1035	1043	-	12.3394	1.49e-05	0.615	GGGCGTGGC
170	mamo-s	BGIBMGA000204	up	494	502	+	11.3303	4.96e-05	0.615	GTGGGTGGC
171	mamo-s	BGIBMGA000205	up	604	612	+	11.3303	4.96e-05	0.615	GTGGGTGGC
172	mamo-s	BGIBMGA000206	down	340	348	-	11.3303	4.96e-05	0.615	GTGGGTGGC
173	mamo-s	BGIBMGA000206	up	341	349	-	11.3303	4.96e-05	0.615	GTGGGTGGC
174	mamo-s	BGIBMGA000206	down	1814	1822	+	10.5138	9.75e-05	0.865	GTGCGTGTT
175	mamo-s	BGIBMGA000207	up	455	463	-	11.3303	4.96e-05	0.615	GTGGGTGGC
176	mamo-s	BGIBMGA000207	up	1929	1937	+	10.5138	9.75e-05	0.865	GTGCGTGTT
177	mamo-s	BGIBMGA000208	down	371	379	+	12.1284	2.16e-05	0.615	GTGCGAGGC
178	mamo-s	BGIBMGA000208	up	733	741	-	10.9358	7.3e-05	0.728	GCGGGTGGC
179	mamo-s	BGIBMGA000208	down	522	530	-	10.7523	8.38e-05	0.797	GGGCGTGTC
180	mamo-s	BGIBMGA000208	up	687	695	-	10.6881	8.61e-05	0.81	GCACGTGGC
181	mamo-s	BGIBMGA000210	up	21	29	-	11.3303	4.96e-05	0.615	GTGGGTGGC
182	mamo-s	BGIBMGA000212	down	831	839	+	10.5138	9.75e-05	0.865	GTGCGTGTT
183	mamo-s	BGIBMGA000215	up	193	201	-	11.3303	4.96e-05	0.615	GTGGGTGGC
184	mamo-s	BGIBMGA000219	up	1205	1213	-	10.9358	7.3e-05	0.728	GCGGGTGGC
185	mamo-s	BGIBMGA000222	down	868	876	+	11.7798	3.11e-05	0.615	ATGCGTGGC
186	mamo-s	BGIBMGA000223	up	1015	1023	+	11.3303	4.96e-05	0.615	GTGGGTGGC
187	mamo-s	BGIBMGA000223	up	1121	1129	-	10.5688	8.88e-05	0.824	GTGCGTGAC
188	mamo-s	BGIBMGA000224	up	1394	1402	-	11.1376	6.35e-05	0.709	TCGCGTGGC
189	mamo-s	BGIBMGA000225	up	69	77	+	11.3303	4.96e-05	0.615	GTGGGTGGC
190	mamo-s	BGIBMGA000225	down	922	930	+	11.3303	4.96e-05	0.615	GTGGGTGGC
191	mamo-s	BGIBMGA000228	up	1425	1433	-	11.3303	4.96e-05	0.615	GTGGGTGGC
192	mamo-s	BGIBMGA000232	down	658	666	-	13.6606	4.06e-06	0.615	GCGCGTGGC
193	mamo-s	BGIBMGA000232	up	1984	1992	+	11.5321	4.06e-05	0.615	TTGCGTGGC
194	mamo-s	BGIBMGA000232	down	1083	1091	+	11.3303	4.96e-05	0.615	GTGGGTGGC
195	mamo-s	BGIBMGA000234	down	911	919	+	11.3303	4.96e-05	0.615	GTGGGTGGC
196	mamo-s	BGIBMGA000234	up	1705	1713	-	11.2018	5.68e-05	0.674	CTGCGTGGT
197	mamo-s	BGIBMGA000235	up	920	928	+	11.3303	4.96e-05	0.615	GTGGGTGGC
198	mamo-s	BGIBMGA000235	down	1717	1725	+	11.3303	4.96e-05	0.615	GTGGGTGGC
199	mamo-s	BGIBMGA000237	up	355	363	-	11.2018	5.68e-05	0.674	CTGCGTGGT
200	mamo-s	BGIBMGA000241	down	1599	1607	+	11.3303	4.96e-05	0.615	GTGGGTGGC
201	mamo-s	BGIBMGA000241	down	1968	1976	+	11.3303	4.96e-05	0.615	GTGGGTGGC
202	mamo-s	BGIBMGA000242	up	729	737	-	14.055	2.23e-06	0.615	GTGCGTGGC
203	mamo-s	BGIBMGA000242	up	656	664	+	10.7523	8.38e-05	0.797	GGGCGTGTC
204	mamo-s	BGIBMGA000244	down	1248	1256	+	11.4404	4.51e-05	0.615	GAGCGTGTC
205	mamo-s	BGIBMGA000245	down	434	442	+	11.3303	4.96e-05	0.615	GTGGGTGGC
206	mamo-s	BGIBMGA000247	up	1096	1104	+	11.3303	4.96e-05	0.615	GTGGGTGGC
207	mamo-s	BGIBMGA000249	up	1335	1343	-	11.3303	4.96e-05	0.615	GTGGGTGGC
208	mamo-s	BGIBMGA000249	up	1854	1862	+	11.3303	4.96e-05	0.615	GTGGGTGGC
209	mamo-s	BGIBMGA000251	down	852	860	+	11.0826	6.84e-05	0.709	GTACGTGGC
210	mamo-s	BGIBMGA000252	down	708	716	-	11.3303	4.96e-05	0.615	GTGGGTGGC
211	mamo-s	BGIBMGA000254	down	401	409	-	11.3303	4.96e-05	0.615	GTGGGTGGC
212	mamo-s	BGIBMGA000255	up	1121	1129	-	11.3303	4.96e-05	0.615	GTGGGTGGC
213	mamo-s	BGIBMGA000257	down	748	756	+	11.3303	4.96e-05	0.615	GTGGGTGGC
214	mamo-s	BGIBMGA000259	down	576	584	+	11.3303	4.96e-05	0.615	GTGGGTGGC
215	mamo-s	BGIBMGA000260	down	215	223	-	11.3303	4.96e-05	0.615	GTGGGTGGC
216	mamo-s	BGIBMGA000260	down	1814	1822	-	10.5413	9.42e-05	0.857	CAGCGTGTC
217	mamo-s	BGIBMGA000266	down	780	788	+	11.3303	4.96e-05	0.615	GTGGGTGGC
218	mamo-s	BGIBMGA000268	down	391	399	-	11.3303	4.96e-05	0.615	GTGGGTGGC
219	mamo-s	BGIBMGA000268	down	1584	1592	+	11.3303	4.96e-05	0.615	GTGGGTGGC
220	mamo-s	BGIBMGA000271	up	877	885	-	11.7064	3.52e-05	0.615	GCGCGTGGT
221	mamo-s	BGIBMGA000273	up	715	723	+	11.3303	4.96e-05	0.615	GTGGGTGGC
222	mamo-s	BGIBMGA000275	up	1199	1207	+	11.1743	5.9e-05	0.684	CCGCGTGTC
223	mamo-s	BGIBMGA000278	up	138	146	+	11.3303	4.96e-05	0.615	GTGGGTGGC
224	mamo-s	BGIBMGA000279	down	1850	1858	-	11.3303	4.96e-05	0.615	GTGGGTGGC
225	mamo-s	BGIBMGA000280	down	1283	1291	-	12.3394	1.49e-05	0.615	GGGCGTGGC
226	mamo-s	BGIBMGA000280	down	1220	1228	+	11.3303	4.96e-05	0.615	GTGGGTGGC
227	mamo-s	BGIBMGA000280	up	1261	1269	-	11.3303	4.96e-05	0.615	GTGGGTGGC
228	mamo-s	BGIBMGA000280	down	1546	1554	+	11.0826	6.84e-05	0.709	GTACGTGGC
229	mamo-s	BGIBMGA000281	up	11	19	-	11.1743	5.9e-05	0.684	CCGCGTGTC
230	mamo-s	BGIBMGA000283	up	1189	1197	+	11.3303	4.96e-05	0.615	GTGGGTGGC
231	mamo-s	BGIBMGA000286	up	375	383	-	11.1743	5.9e-05	0.684	CCGCGTGTC
232	mamo-s	BGIBMGA000290	down	528	536	-	11.3303	4.96e-05	0.615	GTGGGTGGC
233	mamo-s	BGIBMGA000292	down	111	119	-	11.0826	6.84e-05	0.709	GTACGTGGC
234	mamo-s	BGIBMGA000294	down	647	655	-	11.3303	4.96e-05	0.615	GTGGGTGGC
235	mamo-s	BGIBMGA000296	up	1111	1119	-	13.156	6.3e-06	0.615	CTGCGTGGC
236	mamo-s	BGIBMGA000296	down	1752	1760	-	12.1284	2.16e-05	0.615	GTGCGAGGC
237	mamo-s	BGIBMGA000297	up	220	228	+	11.3303	4.96e-05	0.615	GTGGGTGGC
238	mamo-s	BGIBMGA000298	down	1344	1352	-	10.6881	8.61e-05	0.81	GCACGTGGC
239	mamo-s	BGIBMGA000301	up	732	740	-	10.7523	8.38e-05	0.797	AAGCGTGGC
240	mamo-s	BGIBMGA000302	up	391	399	-	12.1284	2.16e-05	0.615	CAGCGTGGC
241	mamo-s	BGIBMGA000305	down	1270	1278	-	11.3303	4.96e-05	0.615	GTGGGTGGC
242	mamo-s	BGIBMGA000306	down	1645	1653	-	11.3303	4.96e-05	0.615	GTGGGTGGC
243	mamo-s	BGIBMGA000308	up	459	467	+	11.3303	4.96e-05	0.615	GTGGGTGGC
244	mamo-s	BGIBMGA000313	down	773	781	-	11.3303	4.96e-05	0.615	GTGGGTGGC
245	mamo-s	BGIBMGA000315	down	861	869	+	11.3303	4.96e-05	0.615	GTGGGTGGC
246	mamo-s	BGIBMGA000320	down	1491	1499	-	11.7339	3.29e-05	0.615	GCGCGAGGC
247	mamo-s	BGIBMGA000320	up	1836	1844	+	10.5138	9.75e-05	0.865	GTGCGTGTT
248	mamo-s	BGIBMGA000321	up	472	480	-	12.1835	1.71e-05	0.615	GTGCGTGCC
249	mamo-s	BGIBMGA000321	up	1145	1153	-	11.0826	6.84e-05	0.709	GTACGTGGC
250	mamo-s	BGIBMGA000322	up	1328	1336	+	11.3303	4.96e-05	0.615	GTGGGTGGC
251	mamo-s	BGIBMGA000323	down	1778	1786	-	11.3303	4.96e-05	0.615	GTGGGTGGC
252	mamo-s	BGIBMGA000328	down	1606	1614	-	11.3303	4.96e-05	0.615	GTGGGTGGC
253	mamo-s	BGIBMGA000330	down	594	602	-	10.8899	7.48e-05	0.739	CCGCGTGCC
254	mamo-s	BGIBMGA000333	up	1740	1748	+	11.0826	6.84e-05	0.709	GTACGTGGC
255	mamo-s	BGIBMGA000336	down	1509	1517	+	11.3303	4.96e-05	0.615	GTGGGTGGC
256	mamo-s	BGIBMGA000336	up	53	61	+	10.5413	9.42e-05	0.857	CAGCGTGTC
257	mamo-s	BGIBMGA000339	up	483	491	+	11.3303	4.96e-05	0.615	GTGGGTGGC
258	mamo-s	BGIBMGA000341	down	779	787	-	12.1835	1.71e-05	0.615	GTGCGTGCC
259	mamo-s	BGIBMGA000348	up	1591	1599	+	11.3303	4.96e-05	0.615	GTGGGTGGC
260	mamo-s	BGIBMGA000353	up	1753	1761	-	11.0826	6.84e-05	0.709	GTACGTGGC
261	mamo-s	BGIBMGA000355	down	804	812	+	11.3303	4.96e-05	0.615	GTGGGTGGC
262	mamo-s	BGIBMGA000358	up	695	703	+	10.8899	7.48e-05	0.739	CCGCGTGCC
263	mamo-s	BGIBMGA000361	down	663	671	-	11.3303	4.96e-05	0.615	GTGGGTGGC
264	mamo-s	BGIBMGA000364	down	1098	1106	-	11.3303	4.96e-05	0.615	GTGGGTGGC
265	mamo-s	BGIBMGA000371	down	594	602	+	14.055	2.23e-06	0.615	GTGCGTGGC
266	mamo-s	BGIBMGA000375	up	234	242	-	10.5138	9.75e-05	0.865	GTGCGTGTT
267	mamo-s	BGIBMGA000377	up	723	731	-	11.3303	4.96e-05	0.615	GTGGGTGGC
268	mamo-s	BGIBMGA000377	down	1834	1842	-	10.8349	7.66e-05	0.751	CCGCGAGGC
269	mamo-s	BGIBMGA000384	up	1339	1347	+	11.3303	4.96e-05	0.615	GTGGGTGGC
270	mamo-s	BGIBMGA000384	down	1577	1585	+	11.1743	5.9e-05	0.684	CCGCGTGTC
271	mamo-s	BGIBMGA000384	down	1987	1995	-	11.0826	6.84e-05	0.709	GTACGTGGC
272	mamo-s	BGIBMGA000384	down	1747	1755	+	10.8899	7.48e-05	0.739	CCGCGTGCC
273	mamo-s	BGIBMGA000386	up	1035	1043	+	11.4404	4.51e-05	0.615	CGGCGTGGC
274	mamo-s	BGIBMGA000388	up	1725	1733	+	10.5688	8.88e-05	0.824	GTGCGTGAC
275	mamo-s	BGIBMGA000398	up	315	323	-	12.3394	1.49e-05	0.615	GGGCGTGGC
276	mamo-s	BGIBMGA000400	up	990	998	+	11.3303	4.96e-05	0.615	GTGGGTGGC
277	mamo-s	BGIBMGA000403	down	1547	1555	-	11.3303	4.96e-05	0.615	GTGGGTGGC
278	mamo-s	BGIBMGA000405	down	1060	1068	+	11.156	6.13e-05	0.705	GAGCGTGCC
279	mamo-s	BGIBMGA000409	up	739	747	+	11.3303	4.96e-05	0.615	GTGGGTGGC
280	mamo-s	BGIBMGA000411	up	294	302	-	10.7523	8.38e-05	0.797	AAGCGTGGC
281	mamo-s	BGIBMGA000411	down	179	187	-	10.5138	9.75e-05	0.865	GTGCGTGTT
282	mamo-s	BGIBMGA000412	up	38	46	-	10.5138	9.75e-05	0.865	GTGCGTGTT
283	mamo-s	BGIBMGA000413	down	286	294	+	11.5688	3.79e-05	0.615	CTGCGTGTC
284	mamo-s	BGIBMGA000417	down	726	734	-	11.3303	4.96e-05	0.615	GTGGGTGGC
285	mamo-s	BGIBMGA000419	up	1596	1604	+	11.3303	4.96e-05	0.615	GTGGGTGGC
286	mamo-s	BGIBMGA000419	down	1361	1369	-	10.9358	7.3e-05	0.728	GCGGGTGGC
287	mamo-s	BGIBMGA000420	down	1661	1669	+	11.3303	4.96e-05	0.615	GTGGGTGGC
288	mamo-s	BGIBMGA000420	up	634	642	-	10.9358	7.3e-05	0.728	GCGGGTGGC
289	mamo-s	BGIBMGA000421	up	99	107	-	11.0826	6.84e-05	0.709	GTACGTGGC
290	mamo-s	BGIBMGA000423	up	592	600	+	11.1376	6.35e-05	0.709	TCGCGTGGC
291	mamo-s	BGIBMGA000425	down	1207	1215	-	12.4679	1.31e-05	0.615	GTGCGTGTC
292	mamo-s	BGIBMGA000428	down	1611	1619	-	10.7523	8.38e-05	0.797	GGGCGTGTC
293	mamo-s	BGIBMGA000429	down	389	397	-	11.3303	4.96e-05	0.615	GTGGGTGGC
294	mamo-s	BGIBMGA000429	down	1235	1243	-	11.3303	4.96e-05	0.615	GTGGGTGGC
295	mamo-s	BGIBMGA000429	up	571	579	-	10.7523	8.38e-05	0.797	GGGCGTGTC
296	mamo-s	BGIBMGA000433	down	1592	1600	-	11.7798	3.11e-05	0.615	ATGCGTGGC
297	mamo-s	BGIBMGA000433	down	547	555	+	11.0734	7.12e-05	0.726	GAGCGTGGT
298	mamo-s	BGIBMGA000436	up	1316	1324	+	11.3303	4.96e-05	0.615	GTGGGTGGC
299	mamo-s	BGIBMGA000438	up	247	255	-	11.2844	5.18e-05	0.63	CTGCGTGCC
300	mamo-s	BGIBMGA000439	down	451	459	-	11.3303	4.96e-05	0.615	GTGGGTGGC
301	mamo-s	BGIBMGA000440	down	1886	1894	-	12.1284	2.16e-05	0.615	CAGCGTGGC
302	mamo-s	BGIBMGA000441	up	505	513	-	12.1284	2.16e-05	0.615	CAGCGTGGC
303	mamo-s	BGIBMGA000442	up	1087	1095	+	11.3303	4.96e-05	0.615	GTGGGTGGC
304	mamo-s	BGIBMGA000446	up	272	280	+	12.3394	1.49e-05	0.615	GGGCGTGGC
305	mamo-s	BGIBMGA000448	up	760	768	+	11.3303	4.96e-05	0.615	GTGGGTGGC
306	mamo-s	BGIBMGA000449	down	1092	1100	-	11.3303	4.96e-05	0.615	GTGGGTGGC
307	mamo-s	BGIBMGA000450	up	632	640	+	12.0734	2.66e-05	0.615	GCGCGTGTC
308	mamo-s	BGIBMGA000453	up	1322	1330	+	10.9358	7.3e-05	0.728	GCGGGTGGC
309	mamo-s	BGIBMGA000453	up	1038	1046	+	10.5413	9.42e-05	0.857	GTGCGAGTC
310	mamo-s	BGIBMGA000455	down	1647	1655	+	11.3303	4.96e-05	0.615	GTGGGTGGC
311	mamo-s	BGIBMGA000456	down	1885	1893	-	11.3303	4.96e-05	0.615	GTGGGTGGC
312	mamo-s	BGIBMGA000458	down	407	415	+	11.2018	5.68e-05	0.674	CTGCGTGGT
313	mamo-s	BGIBMGA000459	up	1179	1187	+	11.2018	5.68e-05	0.674	CTGCGTGGT
314	mamo-s	BGIBMGA000460	up	1243	1251	+	11.2018	5.68e-05	0.674	CTGCGTGGT
315	mamo-s	BGIBMGA000462	up	1957	1965	+	12.4679	1.31e-05	0.615	GTGCGTGTC
316	mamo-s	BGIBMGA000464	up	1390	1398	+	14.055	2.23e-06	0.615	GTGCGTGGC
317	mamo-s	BGIBMGA000465	down	1835	1843	+	11.3303	4.96e-05	0.615	GTGGGTGGC
318	mamo-s	BGIBMGA000466	down	1740	1748	+	14.055	2.23e-06	0.615	GTGCGTGGC
319	mamo-s	BGIBMGA000466	up	725	733	-	11.3303	4.96e-05	0.615	GTGGGTGGC
320	mamo-s	BGIBMGA000471	down	1570	1578	-	11.0826	6.84e-05	0.709	GTACGTGGC
321	mamo-s	BGIBMGA000472	up	1240	1248	-	11.3303	4.96e-05	0.615	GTGGGTGGC
322	mamo-s	BGIBMGA000473	down	518	526	-	11.3303	4.96e-05	0.615	GTGGGTGGC
323	mamo-s	BGIBMGA000475	up	647	655	+	11.0734	7.12e-05	0.726	GAGCGTGGT
324	mamo-s	BGIBMGA000476	up	824	832	+	11.3303	4.96e-05	0.615	GTGGGTGGC
325	mamo-s	BGIBMGA000478	down	187	195	+	11.2018	5.68e-05	0.674	CTGCGTGGT
326	mamo-s	BGIBMGA000484	up	1848	1856	-	11.2018	5.68e-05	0.674	CTGCGTGGT
327	mamo-s	BGIBMGA000487	up	742	750	+	13.6606	4.06e-06	0.615	GCGCGTGGC
328	mamo-s	BGIBMGA000487	up	1716	1724	+	11.7798	3.11e-05	0.615	ATGCGTGGC
329	mamo-s	BGIBMGA000488	down	585	593	+	12.4679	1.31e-05	0.615	GTGCGTGTC
330	mamo-s	BGIBMGA000489	down	8	16	+	11.789	2.84e-05	0.615	GCGCGTGCC
331	mamo-s	BGIBMGA000489	down	919	927	-	11.3303	4.96e-05	0.615	GTGGGTGGC
332	mamo-s	BGIBMGA000490	up	1543	1551	-	11.3303	4.96e-05	0.615	GTGGGTGGC
333	mamo-s	BGIBMGA000491	down	1763	1771	+	11.3303	4.96e-05	0.615	GTGGGTGGC
334	mamo-s	BGIBMGA000492	down	224	232	-	11.789	2.84e-05	0.615	GCGCGTGCC
335	mamo-s	BGIBMGA000495	down	1081	1089	-	11.3303	4.96e-05	0.615	GTGGGTGGC
336	mamo-s	BGIBMGA000495	down	1398	1406	+	11.3303	4.96e-05	0.615	GTGGGTGGC
337	mamo-s	BGIBMGA000496	down	1122	1130	-	13.156	6.3e-06	0.615	CTGCGTGGC
338	mamo-s	BGIBMGA000496	up	1500	1508	-	11.2294	5.41e-05	0.65	CTGCGAGGC
339	mamo-s	BGIBMGA000497	up	1786	1794	-	12.4679	1.31e-05	0.615	GTGCGTGTC
340	mamo-s	BGIBMGA000497	down	196	204	+	12.1835	1.71e-05	0.615	GTGCGTGCC
341	mamo-s	BGIBMGA000499	down	1120	1128	-	11.3303	4.96e-05	0.615	GTGGGTGGC
342	mamo-s	BGIBMGA000499	up	635	643	+	10.5138	9.75e-05	0.865	GTGCGTGTT
343	mamo-s	BGIBMGA000502	up	1232	1240	-	11.3303	4.96e-05	0.615	GTGGGTGGC
344	mamo-s	BGIBMGA000505	down	1370	1378	-	11.0734	7.12e-05	0.726	GAGCGTGGT
345	mamo-s	BGIBMGA000506	down	1132	1140	-	11.3853	4.74e-05	0.615	ACGCGTGGC
346	mamo-s	BGIBMGA000508	down	1909	1917	+	11.0826	6.84e-05	0.709	GTACGTGGC
347	mamo-s	BGIBMGA000510	up	386	394	+	11.3303	4.96e-05	0.615	GTGGGTGGC
348	mamo-s	BGIBMGA000513	down	473	481	-	11.3303	4.96e-05	0.615	GTGGGTGGC
349	mamo-s	BGIBMGA000513	down	793	801	-	11.3303	4.96e-05	0.615	GTGGGTGGC
350	mamo-s	BGIBMGA000517	down	995	1003	+	10.5138	9.75e-05	0.865	GTGCGTGTT
351	mamo-s	BGIBMGA000520	down	615	623	-	12.1284	2.16e-05	0.615	CAGCGTGGC
352	mamo-s	BGIBMGA000520	down	580	588	-	10.5688	8.88e-05	0.824	GTGCGTGAC
353	mamo-s	BGIBMGA000522	down	1388	1396	+	11.0826	6.84e-05	0.709	GTACGTGGC
354	mamo-s	BGIBMGA000526	down	1935	1943	+	11.7064	3.52e-05	0.615	GCGCGTGGT
355	mamo-s	BGIBMGA000527	down	1806	1814	-	12.1284	2.16e-05	0.615	CAGCGTGGC
356	mamo-s	BGIBMGA000528	up	285	293	+	11.3303	4.96e-05	0.615	GTGGGTGGC
357	mamo-s	BGIBMGA000535	down	1121	1129	-	11.3303	4.96e-05	0.615	GTGGGTGGC
358	mamo-s	BGIBMGA000536	down	1742	1750	-	10.6881	8.61e-05	0.81	GCACGTGGC
359	mamo-s	BGIBMGA000542	up	741	749	+	11.1743	5.9e-05	0.684	CCGCGTGTC
360	mamo-s	BGIBMGA000551	up	1826	1834	+	13.6606	4.06e-06	0.615	GCGCGTGGC
361	mamo-s	BGIBMGA000553	down	777	785	-	11.0826	6.84e-05	0.709	GTACGTGGC
362	mamo-s	BGIBMGA000554	down	179	187	-	11.1376	6.35e-05	0.709	TCGCGTGGC
363	mamo-s	BGIBMGA000556	down	910	918	+	12.1835	1.71e-05	0.615	GTGCGTGCC
364	mamo-s	BGIBMGA000556	down	1858	1866	+	11.3303	4.96e-05	0.615	GTGGGTGGC
365	mamo-s	BGIBMGA000559	up	411	419	-	10.5413	9.42e-05	0.857	GTGCGAGTC
366	mamo-s	BGIBMGA000561	down	899	907	+	11.1376	6.35e-05	0.709	TCGCGTGGC
367	mamo-s	BGIBMGA000562	down	103	111	+	11.7798	3.11e-05	0.615	ATGCGTGGC
368	mamo-s	BGIBMGA000566	down	72	80	+	11.3853	4.74e-05	0.615	ACGCGTGGC
369	mamo-s	BGIBMGA000571	up	1874	1882	-	11.789	2.84e-05	0.615	GCGCGTGCC
370	mamo-s	BGIBMGA000571	down	1071	1079	+	11.3303	4.96e-05	0.615	GTGGGTGGC
371	mamo-s	BGIBMGA000572	up	768	776	-	12.1835	1.71e-05	0.615	GTGCGTGCC
372	mamo-s	BGIBMGA000575	up	1727	1735	-	11.3303	4.96e-05	0.615	GTGGGTGGC
373	mamo-s	BGIBMGA000576	down	923	931	+	10.5138	9.75e-05	0.865	GTGCGTGTT
374	mamo-s	BGIBMGA000579	up	1559	1567	+	11.3303	4.96e-05	0.615	GTGGGTGGC
375	mamo-s	BGIBMGA000580	up	1246	1254	+	11.3303	4.96e-05	0.615	GTGGGTGGC
376	mamo-s	BGIBMGA000582	up	391	399	+	11.3303	4.96e-05	0.615	GTGGGTGGC
377	mamo-s	BGIBMGA000584	down	1892	1900	-	11.3303	4.96e-05	0.615	GTGGGTGGC
378	mamo-s	BGIBMGA000585	up	1081	1089	+	11.1376	6.35e-05	0.709	TCGCGTGGC
379	mamo-s	BGIBMGA000587	up	1840	1848	+	11.3303	4.96e-05	0.615	GTGGGTGGC
380	mamo-s	BGIBMGA000591	up	553	561	-	11.3303	4.96e-05	0.615	GTGGGTGGC
381	mamo-s	BGIBMGA000592	up	334	342	-	11.1743	5.9e-05	0.684	CCGCGTGTC
382	mamo-s	BGIBMGA000593	up	1524	1532	-	11.3303	4.96e-05	0.615	GTGGGTGGC
383	mamo-s	BGIBMGA000594	up	104	112	-	11.3303	4.96e-05	0.615	GTGGGTGGC
384	mamo-s	BGIBMGA000594	down	488	496	+	11.3303	4.96e-05	0.615	GTGGGTGGC
385	mamo-s	BGIBMGA000595	up	190	198	-	10.9358	7.3e-05	0.728	GCGGGTGGC
386	mamo-s	BGIBMGA000597	down	1648	1656	+	11.4404	4.51e-05	0.615	GAGCGTGTC
387	mamo-s	BGIBMGA000597	up	686	694	+	11.3303	4.96e-05	0.615	GTGGGTGGC
388	mamo-s	BGIBMGA000598	down	581	589	+	12.1284	2.16e-05	0.615	CAGCGTGGC
389	mamo-s	BGIBMGA000600	up	676	684	+	12.4679	1.31e-05	0.615	GTGCGTGTC
390	mamo-s	BGIBMGA000601	up	506	514	+	11.3303	4.96e-05	0.615	GTGGGTGGC
391	mamo-s	BGIBMGA000604	up	411	419	+	11.3303	4.96e-05	0.615	GTGGGTGGC
392	mamo-s	BGIBMGA000604	down	937	945	+	11.2294	5.41e-05	0.65	CTGCGAGGC
393	mamo-s	BGIBMGA000604	down	944	952	-	10.6881	8.61e-05	0.81	GCACGTGGC
394	mamo-s	BGIBMGA000605	up	921	929	+	11.2294	5.41e-05	0.65	CTGCGAGGC
395	mamo-s	BGIBMGA000605	up	928	936	-	10.6881	8.61e-05	0.81	GCACGTGGC
396	mamo-s	BGIBMGA000608	down	1663	1671	-	10.5138	9.75e-05	0.865	GTGCGTGTT
397	mamo-s	BGIBMGA000610	up	1209	1217	+	11.4404	4.51e-05	0.615	GAGCGTGTC
398	mamo-s	BGIBMGA000610	down	915	923	+	10.5688	8.88e-05	0.824	GTGCGTGAC
399	mamo-s	BGIBMGA000611	down	1663	1671	+	11.3303	4.96e-05	0.615	GTGGGTGGC
400	mamo-s	BGIBMGA000611	down	685	693	+	11.1009	6.57e-05	0.709	GAGCGAGGC
401	mamo-s	BGIBMGA000612	up	1803	1811	+	10.7523	8.38e-05	0.797	GGGCGTGTC
402	mamo-s	BGIBMGA000613	down	1717	1725	-	12.7615	1.04e-05	0.615	CCGCGTGGC
403	mamo-s	BGIBMGA000615	up	1778	1786	-	11.3303	4.96e-05	0.615	GTGGGTGGC
404	mamo-s	BGIBMGA000618	up	1737	1745	+	11.1376	6.35e-05	0.709	TCGCGTGGC
405	mamo-s	BGIBMGA000619	up	1580	1588	-	11.3303	4.96e-05	0.615	GTGGGTGGC
406	mamo-s	BGIBMGA000620	up	45	53	-	12.1009	2.43e-05	0.615	GTGCGTGGT
407	mamo-s	BGIBMGA000622	up	1664	1672	-	10.8899	7.48e-05	0.739	CCGCGTGCC
408	mamo-s	BGIBMGA000628	up	583	591	-	10.8073	7.89e-05	0.766	CCGCGTGGT
409	mamo-s	BGIBMGA000630	up	465	473	-	10.5688	8.88e-05	0.824	GTGCGTGAC
410	mamo-s	BGIBMGA000631	up	108	116	+	13.0275	8.53e-06	0.615	GAGCGTGGC
411	mamo-s	BGIBMGA000631	down	508	516	-	11.3303	4.96e-05	0.615	GTGGGTGGC
412	mamo-s	BGIBMGA000631	down	1519	1527	-	11.3303	4.96e-05	0.615	GTGGGTGGC
413	mamo-s	BGIBMGA000632	up	1259	1267	-	11.3303	4.96e-05	0.615	GTGGGTGGC
414	mamo-s	BGIBMGA000634	up	682	690	+	14.055	2.23e-06	0.615	GTGCGTGGC
415	mamo-s	BGIBMGA000635	down	1491	1499	+	11.3303	4.96e-05	0.615	GTGGGTGGC
416	mamo-s	BGIBMGA000636	up	267	275	-	11.3303	4.96e-05	0.615	GTGGGTGGC
417	mamo-s	BGIBMGA000637	down	1791	1799	-	11.4404	4.51e-05	0.615	GAGCGTGTC
418	mamo-s	BGIBMGA000640	down	1386	1394	-	11.4404	4.51e-05	0.615	GAGCGTGTC
419	mamo-s	BGIBMGA000640	up	538	546	-	11.3303	4.96e-05	0.615	GTGGGTGGC
420	mamo-s	BGIBMGA000641	down	1852	1860	+	12.0734	2.66e-05	0.615	GCGCGTGTC
421	mamo-s	BGIBMGA000644	up	1947	1955	+	10.6881	8.61e-05	0.81	GCACGTGGC
422	mamo-s	BGIBMGA000648	up	1686	1694	-	11.3303	4.96e-05	0.615	GTGGGTGGC
423	mamo-s	BGIBMGA000648	down	1757	1765	+	11.0826	6.84e-05	0.709	GTACGTGGC
424	mamo-s	BGIBMGA000649	down	1040	1048	-	11.3303	4.96e-05	0.615	GTGGGTGGC
425	mamo-s	BGIBMGA000649	down	564	572	+	11.0826	6.84e-05	0.709	GTACGTGGC
426	mamo-s	BGIBMGA000650	up	296	304	+	13.6606	4.06e-06	0.615	GCGCGTGGC
427	mamo-s	BGIBMGA000650	down	1657	1665	+	10.7523	8.38e-05	0.797	AAGCGTGGC
428	mamo-s	BGIBMGA000653	down	1122	1130	+	11.3303	4.96e-05	0.615	GTGGGTGGC
429	mamo-s	BGIBMGA000653	down	1748	1756	-	11.3303	4.96e-05	0.615	GTGGGTGGC
430	mamo-s	BGIBMGA000655	down	1945	1953	+	11.2018	5.68e-05	0.674	CTGCGTGGT
431	mamo-s	BGIBMGA000656	down	1212	1220	+	10.8899	7.48e-05	0.739	CCGCGTGCC
432	mamo-s	BGIBMGA000658	down	1847	1855	-	11.3303	4.96e-05	0.615	GTGGGTGGC
433	mamo-s	BGIBMGA000659	up	236	244	-	11.0826	6.84e-05	0.709	GTACGTGGC
434	mamo-s	BGIBMGA000660	down	1646	1654	+	11.0734	7.12e-05	0.726	GAGCGTGGT
435	mamo-s	BGIBMGA000660	up	1625	1633	+	10.5413	9.42e-05	0.857	GTGCGAGTC
436	mamo-s	BGIBMGA000662	down	1779	1787	+	11.0826	6.84e-05	0.709	GTACGTGGC
437	mamo-s	BGIBMGA000666	up	578	586	-	11.3303	4.96e-05	0.615	GTGGGTGGC
438	mamo-s	BGIBMGA000667	down	493	501	+	11.1376	6.35e-05	0.709	TCGCGTGGC
439	mamo-s	BGIBMGA000668	down	770	778	+	11.0826	6.84e-05	0.709	GTACGTGGC
440	mamo-s	BGIBMGA000674	up	689	697	+	14.055	2.23e-06	0.615	GTGCGTGGC
441	mamo-s	BGIBMGA000675	up	821	829	-	10.7523	8.38e-05	0.797	AAGCGTGGC
442	mamo-s	BGIBMGA000676	down	1404	1412	+	13.0275	8.53e-06	0.615	GAGCGTGGC
443	mamo-s	BGIBMGA000676	up	614	622	+	12.1835	1.71e-05	0.615	GTGCGTGCC
444	mamo-s	BGIBMGA000686	up	587	595	-	10.5138	9.75e-05	0.865	GTGCGTGTT
445	mamo-s	BGIBMGA000687	down	1360	1368	-	11.3303	4.96e-05	0.615	GTGGGTGGC
446	mamo-s	BGIBMGA000688	up	202	210	-	11.3303	4.96e-05	0.615	GTGGGTGGC
447	mamo-s	BGIBMGA000688	down	1377	1385	-	11.3303	4.96e-05	0.615	GTGGGTGGC
448	mamo-s	BGIBMGA000689	down	1147	1155	+	10.6881	8.61e-05	0.81	GCACGTGGC
449	mamo-s	BGIBMGA000691	up	1054	1062	-	10.5138	9.75e-05	0.865	GTGCGTGTT
450	mamo-s	BGIBMGA000692	down	1269	1277	+	12.1835	1.71e-05	0.615	GTGCGTGCC
451	mamo-s	BGIBMGA000692	down	696	704	+	11.3303	4.96e-05	0.615	GTGGGTGGC
452	mamo-s	BGIBMGA000693	up	1183	1191	+	12.1835	1.71e-05	0.615	GTGCGTGCC
453	mamo-s	BGIBMGA000693	up	610	618	+	11.3303	4.96e-05	0.615	GTGGGTGGC
454	mamo-s	BGIBMGA000695	down	1317	1325	-	11.3303	4.96e-05	0.615	GTGGGTGGC
455	mamo-s	BGIBMGA000696	down	1097	1105	+	10.5413	9.42e-05	0.857	CAGCGTGTC
456	mamo-s	BGIBMGA000697	up	1513	1521	-	11.0826	6.84e-05	0.709	GTACGTGGC
457	mamo-s	BGIBMGA000698	up	74	82	+	11.5321	4.06e-05	0.615	TTGCGTGGC
458	mamo-s	BGIBMGA000698	up	194	202	-	11.3303	4.96e-05	0.615	GTGGGTGGC
459	mamo-s	BGIBMGA000698	down	1429	1437	+	11.3303	4.96e-05	0.615	GTGGGTGGC
460	mamo-s	BGIBMGA000699	up	440	448	+	12.1009	2.43e-05	0.615	GTGCGTGGT
461	mamo-s	BGIBMGA000699	up	349	357	+	11.5321	4.06e-05	0.615	TTGCGTGGC
462	mamo-s	BGIBMGA000701	up	384	392	-	11.2018	5.68e-05	0.674	CTGCGTGGT
463	mamo-s	BGIBMGA000702	down	426	434	-	11.3303	4.96e-05	0.615	GTGGGTGGC
464	mamo-s	BGIBMGA000703	up	1124	1132	-	11.3303	4.96e-05	0.615	GTGGGTGGC
465	mamo-s	BGIBMGA000704	down	1467	1475	-	14.055	2.23e-06	0.615	GTGCGTGGC
466	mamo-s	BGIBMGA000705	down	1318	1326	-	12.3394	1.49e-05	0.615	GGGCGTGGC
467	mamo-s	BGIBMGA000705	up	1372	1380	-	11.2018	5.68e-05	0.674	CTGCGTGGT
468	mamo-s	BGIBMGA000708	up	391	399	-	11.3303	4.96e-05	0.615	GTGGGTGGC
469	mamo-s	BGIBMGA000714	down	61	69	+	10.7523	8.38e-05	0.797	AAGCGTGGC
470	mamo-s	BGIBMGA000715	down	1216	1224	+	11.3303	4.96e-05	0.615	GTGGGTGGC
471	mamo-s	BGIBMGA000716	up	1623	1631	-	11.789	2.84e-05	0.615	GCGCGTGCC
472	mamo-s	BGIBMGA000718	down	1700	1708	-	11.3303	4.96e-05	0.615	GTGGGTGGC
473	mamo-s	BGIBMGA000718	up	1316	1324	+	10.5413	9.42e-05	0.857	GTGCGAGTC
474	mamo-s	BGIBMGA000720	down	1857	1865	-	10.5688	8.88e-05	0.824	GTGCGTGAC
475	mamo-s	BGIBMGA000721	up	810	818	+	11.0826	6.84e-05	0.709	GTACGTGGC
476	mamo-s	BGIBMGA000721	down	564	572	+	11.0734	7.12e-05	0.726	GAGCGTGGT
477	mamo-s	BGIBMGA000722	down	288	296	-	11.3303	4.96e-05	0.615	GTGGGTGGC
478	mamo-s	BGIBMGA000725	up	1983	1991	-	14.055	2.23e-06	0.615	GTGCGTGGC
479	mamo-s	BGIBMGA000726	up	1972	1980	+	11.7064	3.52e-05	0.615	GCGCGTGGT
480	mamo-s	BGIBMGA000726	up	1208	1216	+	11.3303	4.96e-05	0.615	GTGGGTGGC
481	mamo-s	BGIBMGA000726	down	1398	1406	-	11.3303	4.96e-05	0.615	GTGGGTGGC
482	mamo-s	BGIBMGA000728	down	1107	1115	+	11.3303	4.96e-05	0.615	GTGGGTGGC
483	mamo-s	BGIBMGA000729	up	1052	1060	+	11.789	2.84e-05	0.615	GCGCGTGCC
484	mamo-s	BGIBMGA000729	down	290	298	-	11.0826	6.84e-05	0.709	GTACGTGGC
485	mamo-s	BGIBMGA000734	up	375	383	-	11.3303	4.96e-05	0.615	GTGGGTGGC
486	mamo-s	BGIBMGA000734	down	381	389	-	11.3303	4.96e-05	0.615	GTGGGTGGC
487	mamo-s	BGIBMGA000734	down	1157	1165	+	11.3303	4.96e-05	0.615	GTGGGTGGC
488	mamo-s	BGIBMGA000734	up	1429	1437	-	11.2018	5.68e-05	0.674	CTGCGTGGT
489	mamo-s	BGIBMGA000737	up	916	924	+	13.156	6.3e-06	0.615	CTGCGTGGC
490	mamo-s	BGIBMGA000737	down	401	409	-	11.3303	4.96e-05	0.615	GTGGGTGGC
491	mamo-s	BGIBMGA000737	up	815	823	-	11.3303	4.96e-05	0.615	GTGGGTGGC
492	mamo-s	BGIBMGA000739	down	1762	1770	+	11.3303	4.96e-05	0.615	GTGGGTGGC
493	mamo-s	BGIBMGA000740	up	1680	1688	-	11.0826	6.84e-05	0.709	GTACGTGGC
494	mamo-s	BGIBMGA000741	up	213	221	-	11.3303	4.96e-05	0.615	GTGGGTGGC
495	mamo-s	BGIBMGA000741	down	1720	1728	-	11.3303	4.96e-05	0.615	GTGGGTGGC
496	mamo-s	BGIBMGA000741	up	823	831	-	11.0734	7.12e-05	0.726	GAGCGTGGT
497	mamo-s	BGIBMGA000741	down	1544	1552	-	10.7523	8.38e-05	0.797	AAGCGTGGC
498	mamo-s	BGIBMGA000743	down	1173	1181	+	11.3303	4.96e-05	0.615	GTGGGTGGC
499	mamo-s	BGIBMGA000745	down	254	262	+	11.0826	6.84e-05	0.709	GTACGTGGC
500	mamo-s	BGIBMGA000746	up	1550	1558	+	11.3303	4.96e-05	0.615	GTGGGTGGC
501	mamo-s	BGIBMGA000748	down	1029	1037	+	10.8073	7.89e-05	0.766	CCGCGTGGT
502	mamo-s	BGIBMGA000749	up	1728	1736	+	11.3303	4.96e-05	0.615	GTGGGTGGC
503	mamo-s	BGIBMGA000749	down	1696	1704	+	11.2294	5.41e-05	0.65	CTGCGAGGC
504	mamo-s	BGIBMGA000750	down	65	73	+	12.1835	1.71e-05	0.615	GTGCGTGCC
505	mamo-s	BGIBMGA000750	down	888	896	-	11.3303	4.96e-05	0.615	GTGGGTGGC
506	mamo-s	BGIBMGA000750	down	1603	1611	-	11.3303	4.96e-05	0.615	GTGGGTGGC
507	mamo-s	BGIBMGA000750	down	557	565	-	10.9358	7.3e-05	0.728	GCGGGTGGC
508	mamo-s	BGIBMGA000751	up	1935	1943	+	12.4679	1.31e-05	0.615	GTGCGTGTC
509	mamo-s	BGIBMGA000751	down	297	305	+	11.3303	4.96e-05	0.615	GTGGGTGGC
510	mamo-s	BGIBMGA000751	up	595	603	+	11.3303	4.96e-05	0.615	GTGGGTGGC
511	mamo-s	BGIBMGA000754	up	627	635	-	11.0826	6.84e-05	0.709	GTACGTGGC
512	mamo-s	BGIBMGA000756	down	1530	1538	+	10.5413	9.42e-05	0.857	GTGCGAGTC
513	mamo-s	BGIBMGA000758	down	1956	1964	+	11.3853	4.74e-05	0.615	ACGCGTGGC
514	mamo-s	BGIBMGA000760	down	948	956	+	11.3303	4.96e-05	0.615	GTGGGTGGC
515	mamo-s	BGIBMGA000762	up	652	660	+	11.3303	4.96e-05	0.615	GTGGGTGGC
516	mamo-s	BGIBMGA000762	up	1819	1827	+	11.3303	4.96e-05	0.615	GTGGGTGGC
517	mamo-s	BGIBMGA000763	up	1877	1885	+	11.3303	4.96e-05	0.615	GTGGGTGGC
518	mamo-s	BGIBMGA000763	up	1506	1514	+	10.8073	7.89e-05	0.766	CCGCGTGGT
519	mamo-s	BGIBMGA000764	down	1377	1385	-	12.7615	1.04e-05	0.615	CCGCGTGGC
520	mamo-s	BGIBMGA000764	down	801	809	-	11.3303	4.96e-05	0.615	GTGGGTGGC
521	mamo-s	BGIBMGA000764	up	1340	1348	+	11.3303	4.96e-05	0.615	GTGGGTGGC
522	mamo-s	BGIBMGA000764	up	1552	1560	-	11.3303	4.96e-05	0.615	GTGGGTGGC
523	mamo-s	BGIBMGA000764	down	1556	1564	+	10.5413	9.42e-05	0.857	GTGCGAGTC
524	mamo-s	BGIBMGA000765	down	1595	1603	-	10.5138	9.75e-05	0.865	GTGCGTGTT
525	mamo-s	BGIBMGA000767	down	1926	1934	+	14.055	2.23e-06	0.615	GTGCGTGGC
526	mamo-s	BGIBMGA000767	down	1694	1702	-	11.1009	6.57e-05	0.709	GAGCGAGGC
527	mamo-s	BGIBMGA000767	up	142	150	-	10.7523	8.38e-05	0.797	AAGCGTGGC
528	mamo-s	BGIBMGA000769	up	1619	1627	-	11.3303	4.96e-05	0.615	GTGGGTGGC
529	mamo-s	BGIBMGA000771	down	1039	1047	-	11.2294	5.41e-05	0.65	CTGCGAGGC
530	mamo-s	BGIBMGA000775	up	552	560	+	11.3303	4.96e-05	0.615	GTGGGTGGC
531	mamo-s	BGIBMGA000776	down	362	370	-	11.3303	4.96e-05	0.615	GTGGGTGGC
532	mamo-s	BGIBMGA000777	up	938	946	+	11.3303	4.96e-05	0.615	GTGGGTGGC
533	mamo-s	BGIBMGA000778	down	654	662	+	11.3303	4.96e-05	0.615	GTGGGTGGC
534	mamo-s	BGIBMGA000779	down	58	66	-	13.6606	4.06e-06	0.615	GCGCGTGGC
535	mamo-s	BGIBMGA000779	down	321	329	-	11.7339	3.29e-05	0.615	GCGCGAGGC
536	mamo-s	BGIBMGA000781	down	990	998	-	10.9358	7.3e-05	0.728	GCGGGTGGC
537	mamo-s	BGIBMGA000782	down	1858	1866	+	11.3303	4.96e-05	0.615	GTGGGTGGC
538	mamo-s	BGIBMGA000783	down	719	727	-	11.1009	6.57e-05	0.709	GAGCGAGGC
539	mamo-s	BGIBMGA000783	up	1674	1682	+	10.5138	9.75e-05	0.865	GTGCGTGTT
540	mamo-s	BGIBMGA000784	down	541	549	+	11.789	2.84e-05	0.615	GCGCGTGCC
541	mamo-s	BGIBMGA000784	down	952	960	+	11.5321	4.06e-05	0.615	TTGCGTGGC
542	mamo-s	BGIBMGA000784	up	241	249	-	10.5138	9.75e-05	0.865	GTGCGTGTT
543	mamo-s	BGIBMGA000786	down	1526	1534	-	11.3303	4.96e-05	0.615	GTGGGTGGC
544	mamo-s	BGIBMGA000787	up	231	239	+	12.4679	1.31e-05	0.615	GTGCGTGTC
545	mamo-s	BGIBMGA000787	down	768	776	-	11.3303	4.96e-05	0.615	GTGGGTGGC
546	mamo-s	BGIBMGA000787	up	1740	1748	-	11.3303	4.96e-05	0.615	GTGGGTGGC
547	mamo-s	BGIBMGA000787	down	338	346	+	11.2844	5.18e-05	0.63	CTGCGTGCC
548	mamo-s	BGIBMGA000788	up	632	640	+	11.3303	4.96e-05	0.615	GTGGGTGGC
549	mamo-s	BGIBMGA000790	up	1752	1760	+	11.0826	6.84e-05	0.709	GTACGTGGC
550	mamo-s	BGIBMGA000791	down	197	205	+	12.1284	2.16e-05	0.615	CAGCGTGGC
551	mamo-s	BGIBMGA000791	down	1639	1647	-	11.156	6.13e-05	0.705	GAGCGTGCC
552	mamo-s	BGIBMGA000797	up	1361	1369	+	11.3853	4.74e-05	0.615	ACGCGTGGC
553	mamo-s	BGIBMGA000798	down	34	42	-	13.6606	4.06e-06	0.615	GCGCGTGGC
554	mamo-s	BGIBMGA000799	up	1306	1314	+	11.3303	4.96e-05	0.615	GTGGGTGGC
555	mamo-s	BGIBMGA000800	down	1389	1397	+	11.7339	3.29e-05	0.615	GCGCGAGGC
556	mamo-s	BGIBMGA000800	up	959	967	+	11.3303	4.96e-05	0.615	GTGGGTGGC
557	mamo-s	BGIBMGA000800	up	143	151	-	11.0826	6.84e-05	0.709	GTACGTGGC
558	mamo-s	BGIBMGA000801	down	501	509	+	11.0826	6.84e-05	0.709	GTACGTGGC
559	mamo-s	BGIBMGA000802	down	129	137	+	11.3303	4.96e-05	0.615	GTGGGTGGC
560	mamo-s	BGIBMGA000802	down	1543	1551	+	11.3303	4.96e-05	0.615	GTGGGTGGC
561	mamo-s	BGIBMGA000806	up	1844	1852	+	11.3303	4.96e-05	0.615	GTGGGTGGC
562	mamo-s	BGIBMGA000807	down	1254	1262	+	11.0734	7.12e-05	0.726	GAGCGTGGT
563	mamo-s	BGIBMGA000809	down	354	362	-	11.3303	4.96e-05	0.615	GTGGGTGGC
564	mamo-s	BGIBMGA000810	up	1359	1367	+	11.789	2.84e-05	0.615	GCGCGTGCC
565	mamo-s	BGIBMGA000811	up	1767	1775	+	12.0734	2.66e-05	0.615	GCGCGTGTC
566	mamo-s	BGIBMGA000811	up	141	149	-	11.3303	4.96e-05	0.615	GTGGGTGGC
567	mamo-s	BGIBMGA000811	up	1584	1592	+	11.3303	4.96e-05	0.615	GTGGGTGGC
568	mamo-s	BGIBMGA000813	down	1847	1855	+	13.156	6.3e-06	0.615	CTGCGTGGC
569	mamo-s	BGIBMGA000813	down	648	656	-	11.3303	4.96e-05	0.615	GTGGGTGGC
570	mamo-s	BGIBMGA000813	down	1941	1949	-	10.7523	8.38e-05	0.797	GGGCGTGTC
571	mamo-s	BGIBMGA000814	down	1254	1262	-	11.3303	4.96e-05	0.615	GTGGGTGGC
572	mamo-s	BGIBMGA000815	up	800	808	+	11.3303	4.96e-05	0.615	GTGGGTGGC
573	mamo-s	BGIBMGA000815	down	1065	1073	-	10.8899	7.48e-05	0.739	CCGCGTGCC
574	mamo-s	BGIBMGA000816	down	1348	1356	+	11.3303	4.96e-05	0.615	GTGGGTGGC
575	mamo-s	BGIBMGA000820	up	1849	1857	-	11.0734	7.12e-05	0.726	GAGCGTGGT
576	mamo-s	BGIBMGA000821	up	1742	1750	+	11.3303	4.96e-05	0.615	GTGGGTGGC
577	mamo-s	BGIBMGA000821	up	1162	1170	+	10.5688	8.88e-05	0.824	GTGCGTGAC
578	mamo-s	BGIBMGA000823	down	358	366	-	14.055	2.23e-06	0.615	GTGCGTGGC
579	mamo-s	BGIBMGA000824	down	1042	1050	+	11.3303	4.96e-05	0.615	GTGGGTGGC
580	mamo-s	BGIBMGA000824	down	1757	1765	+	11.3303	4.96e-05	0.615	GTGGGTGGC
581	mamo-s	BGIBMGA000824	down	648	656	+	11.2018	5.68e-05	0.674	CTGCGTGGT
582	mamo-s	BGIBMGA000825	down	1888	1896	+	12.1009	2.43e-05	0.615	GTGCGTGGT
583	mamo-s	BGIBMGA000827	down	1079	1087	-	11.3303	4.96e-05	0.615	GTGGGTGGC
584	mamo-s	BGIBMGA000828	down	1562	1570	-	11.5321	4.06e-05	0.615	TTGCGTGGC
585	mamo-s	BGIBMGA000828	down	1063	1071	-	11.4404	4.51e-05	0.615	GAGCGTGTC
586	mamo-s	BGIBMGA000828	down	612	620	+	11.3303	4.96e-05	0.615	GTGGGTGGC
587	mamo-s	BGIBMGA000828	down	1421	1429	+	11.3303	4.96e-05	0.615	GTGGGTGGC
588	mamo-s	BGIBMGA000830	down	1969	1977	+	11.7339	3.29e-05	0.615	GCGCGAGGC
589	mamo-s	BGIBMGA000830	down	1992	2000	-	11.2018	5.68e-05	0.674	CTGCGTGGT
590	mamo-s	BGIBMGA000831	up	152	160	+	14.055	2.23e-06	0.615	GTGCGTGGC
591	mamo-s	BGIBMGA000831	down	125	133	+	11.1009	6.57e-05	0.709	GAGCGAGGC
592	mamo-s	BGIBMGA000833	down	1399	1407	-	10.5138	9.75e-05	0.865	GTGCGTGTT
593	mamo-s	BGIBMGA000835	up	1254	1262	+	11.3303	4.96e-05	0.615	GTGGGTGGC
594	mamo-s	BGIBMGA000835	up	445	453	-	11.0826	6.84e-05	0.709	GTACGTGGC
595	mamo-s	BGIBMGA000835	up	1729	1737	-	11.0826	6.84e-05	0.709	GTACGTGGC
596	mamo-s	BGIBMGA000836	up	1017	1025	-	11.3303	4.96e-05	0.615	GTGGGTGGC
597	mamo-s	BGIBMGA000836	up	542	550	+	11.0826	6.84e-05	0.709	GTACGTGGC
598	mamo-s	BGIBMGA000836	up	1826	1834	+	11.0826	6.84e-05	0.709	GTACGTGGC
599	mamo-s	BGIBMGA000837	up	471	479	-	13.156	6.3e-06	0.615	CTGCGTGGC
600	mamo-s	BGIBMGA000837	up	1114	1122	+	11.3303	4.96e-05	0.615	GTGGGTGGC
601	mamo-s	BGIBMGA000838	down	1971	1979	-	11.7339	3.29e-05	0.615	GCGCGAGGC
602	mamo-s	BGIBMGA000838	down	1948	1956	+	11.5321	4.06e-05	0.615	TTGCGTGGC
603	mamo-s	BGIBMGA000838	up	10	18	+	11.3303	4.96e-05	0.615	GTGGGTGGC
604	mamo-s	BGIBMGA000838	up	1918	1926	-	11.156	6.13e-05	0.705	GAGCGTGCC
605	mamo-s	BGIBMGA000839	down	498	506	+	11.3303	4.96e-05	0.615	GTGGGTGGC
606	mamo-s	BGIBMGA000840	down	1628	1636	+	11.3303	4.96e-05	0.615	GTGGGTGGC
607	mamo-s	BGIBMGA000841	up	454	462	+	11.3303	4.96e-05	0.615	GTGGGTGGC
608	mamo-s	BGIBMGA000841	up	1661	1669	-	11.3303	4.96e-05	0.615	GTGGGTGGC
609	mamo-s	BGIBMGA000841	up	210	218	+	10.9358	7.3e-05	0.728	GCGGGTGGC
610	mamo-s	BGIBMGA000842	down	458	466	+	11.0826	6.84e-05	0.709	GTACGTGGC
611	mamo-s	BGIBMGA000844	up	387	395	+	11.3303	4.96e-05	0.615	GTGGGTGGC
612	mamo-s	BGIBMGA000849	down	893	901	-	11.3303	4.96e-05	0.615	GTGGGTGGC
613	mamo-s	BGIBMGA000849	up	1266	1274	+	11.3303	4.96e-05	0.615	GTGGGTGGC
614	mamo-s	BGIBMGA000850	up	1852	1860	-	11.3303	4.96e-05	0.615	GTGGGTGGC
615	mamo-s	BGIBMGA000852	down	405	413	+	11.4404	4.51e-05	0.615	CGGCGTGGC
616	mamo-s	BGIBMGA000852	down	421	429	+	11.3303	4.96e-05	0.615	GTGGGTGGC
617	mamo-s	BGIBMGA000853	up	1958	1966	+	11.4404	4.51e-05	0.615	CGGCGTGGC
618	mamo-s	BGIBMGA000853	up	1974	1982	+	11.3303	4.96e-05	0.615	GTGGGTGGC
619	mamo-s	BGIBMGA000854	up	631	639	+	11.3303	4.96e-05	0.615	GTGGGTGGC
620	mamo-s	BGIBMGA000859	up	1646	1654	-	12.4679	1.31e-05	0.615	GTGCGTGTC
621	mamo-s	BGIBMGA000860	up	1707	1715	+	11.0826	6.84e-05	0.709	GTACGTGGC
622	mamo-s	BGIBMGA000863	up	1376	1384	+	11.3303	4.96e-05	0.615	GTGGGTGGC
623	mamo-s	BGIBMGA000865	up	260	268	+	14.055	2.23e-06	0.615	GTGCGTGGC
624	mamo-s	BGIBMGA000865	down	486	494	+	11.3303	4.96e-05	0.615	GTGGGTGGC
625	mamo-s	BGIBMGA000866	down	820	828	-	11.3303	4.96e-05	0.615	GTGGGTGGC
626	mamo-s	BGIBMGA000867	down	381	389	-	11.3303	4.96e-05	0.615	GTGGGTGGC
627	mamo-s	BGIBMGA000868	up	1776	1784	-	11.3303	4.96e-05	0.615	GTGGGTGGC
628	mamo-s	BGIBMGA000869	down	1050	1058	+	11.3303	4.96e-05	0.615	GTGGGTGGC
629	mamo-s	BGIBMGA000870	down	1229	1237	-	11.3303	4.96e-05	0.615	GTGGGTGGC
630	mamo-s	BGIBMGA000871	up	927	935	-	11.1009	6.57e-05	0.709	GAGCGAGGC
631	mamo-s	BGIBMGA000871	down	661	669	+	10.5688	8.88e-05	0.824	GTGCGTGAC
632	mamo-s	BGIBMGA000872	down	1711	1719	-	11.3303	4.96e-05	0.615	GTGGGTGGC
633	mamo-s	BGIBMGA000873	down	363	371	-	11.3303	4.96e-05	0.615	GTGGGTGGC
634	mamo-s	BGIBMGA000875	up	1229	1237	+	11.3303	4.96e-05	0.615	GTGGGTGGC
635	mamo-s	BGIBMGA000876	down	1646	1654	-	11.3303	4.96e-05	0.615	GTGGGTGGC
636	mamo-s	BGIBMGA000877	up	1893	1901	+	11.7339	3.29e-05	0.615	GCGCGAGGC
637	mamo-s	BGIBMGA000877	down	818	826	-	11.3303	4.96e-05	0.615	GTGGGTGGC
638	mamo-s	BGIBMGA000878	down	1902	1910	-	11.789	2.84e-05	0.615	GCGCGTGCC
639	mamo-s	BGIBMGA000881	up	1216	1224	-	11.3303	4.96e-05	0.615	GTGGGTGGC
640	mamo-s	BGIBMGA000883	up	1348	1356	-	11.0826	6.84e-05	0.709	GTACGTGGC
641	mamo-s	BGIBMGA000885	down	1236	1244	+	11.3303	4.96e-05	0.615	GTGGGTGGC
642	mamo-s	BGIBMGA000886	down	1050	1058	+	11.3303	4.96e-05	0.615	GTGGGTGGC
643	mamo-s	BGIBMGA000889	down	1151	1159	+	11.3303	4.96e-05	0.615	GTGGGTGGC
644	mamo-s	BGIBMGA000894	down	964	972	+	11.3303	4.96e-05	0.615	GTGGGTGGC
645	mamo-s	BGIBMGA000894	down	604	612	+	10.7523	8.38e-05	0.797	GGGCGTGTC
646	mamo-s	BGIBMGA000895	down	570	578	+	11.7339	3.29e-05	0.615	GCGCGAGGC
647	mamo-s	BGIBMGA000898	down	1702	1710	-	13.156	6.3e-06	0.615	CTGCGTGGC
648	mamo-s	BGIBMGA000898	down	1850	1858	+	13.156	6.3e-06	0.615	CTGCGTGGC
649	mamo-s	BGIBMGA000899	up	1509	1517	-	13.156	6.3e-06	0.615	CTGCGTGGC
650	mamo-s	BGIBMGA000899	up	1657	1665	+	13.156	6.3e-06	0.615	CTGCGTGGC
651	mamo-s	BGIBMGA000899	down	1343	1351	+	11.3303	4.96e-05	0.615	GTGGGTGGC
652	mamo-s	BGIBMGA000901	up	566	574	+	12.1009	2.43e-05	0.615	GTGCGTGGT
653	mamo-s	BGIBMGA000902	up	121	129	+	11.3303	4.96e-05	0.615	GTGGGTGGC
654	mamo-s	BGIBMGA000902	down	8	16	+	10.8899	7.48e-05	0.739	CCGCGTGCC
655	mamo-s	BGIBMGA000904	up	948	956	+	11.1743	5.9e-05	0.684	CCGCGTGTC
656	mamo-s	BGIBMGA000904	down	1299	1307	-	11.0826	6.84e-05	0.709	GTACGTGGC
657	mamo-s	BGIBMGA000906	up	663	671	-	11.3303	4.96e-05	0.615	GTGGGTGGC
658	mamo-s	BGIBMGA000906	down	33	41	+	10.5413	9.42e-05	0.857	GTGCGAGTC
659	mamo-s	BGIBMGA000908	down	531	539	-	10.5138	9.75e-05	0.865	GTGCGTGTT
660	mamo-s	BGIBMGA000912	up	833	841	+	11.3303	4.96e-05	0.615	GTGGGTGGC
661	mamo-s	BGIBMGA000912	down	1757	1765	+	11.1009	6.57e-05	0.709	GAGCGAGGC
662	mamo-s	BGIBMGA000913	up	900	908	+	10.7523	8.38e-05	0.797	GGGCGTGTC
663	mamo-s	BGIBMGA000917	down	1639	1647	-	11.3303	4.96e-05	0.615	GTGGGTGGC
664	mamo-s	BGIBMGA000918	down	1872	1880	+	10.5138	9.75e-05	0.865	GTGCGTGTT
665	mamo-s	BGIBMGA000920	down	776	784	-	11.3303	4.96e-05	0.615	GTGGGTGGC
666	mamo-s	BGIBMGA000924	up	729	737	-	11.0826	6.84e-05	0.709	GTACGTGGC
667	mamo-s	BGIBMGA000924	up	45	53	+	11.0734	7.12e-05	0.726	GAGCGTGGT
668	mamo-s	BGIBMGA000926	up	1291	1299	-	11.3853	4.74e-05	0.615	ACGCGTGGC
669	mamo-s	BGIBMGA000929	up	365	373	+	11.3303	4.96e-05	0.615	GTGGGTGGC
670	mamo-s	BGIBMGA000931	down	1806	1814	-	11.1009	6.57e-05	0.709	GAGCGAGGC
671	mamo-s	BGIBMGA000934	down	1376	1384	+	11.3303	4.96e-05	0.615	GTGGGTGGC
672	mamo-s	BGIBMGA000935	down	1529	1537	+	11.0826	6.84e-05	0.709	GTACGTGGC
673	mamo-s	BGIBMGA000937	up	744	752	-	11.3303	4.96e-05	0.615	GTGGGTGGC
674	mamo-s	BGIBMGA000948	up	687	695	-	11.3303	4.96e-05	0.615	GTGGGTGGC
675	mamo-s	BGIBMGA000949	down	1073	1081	-	12.1284	2.16e-05	0.615	GTGCGAGGC
676	mamo-s	BGIBMGA000950	up	371	379	-	11.3303	4.96e-05	0.615	GTGGGTGGC
677	mamo-s	BGIBMGA000951	up	196	204	+	10.8349	7.66e-05	0.751	CCGCGAGGC
678	mamo-s	BGIBMGA000952	down	1683	1691	+	12.1009	2.43e-05	0.615	GTGCGTGGT
679	mamo-s	BGIBMGA000955	up	391	399	-	14.055	2.23e-06	0.615	GTGCGTGGC
680	mamo-s	BGIBMGA000960	down	761	769	-	11.3303	4.96e-05	0.615	GTGGGTGGC
681	mamo-s	BGIBMGA000963	up	1220	1228	+	11.2844	5.18e-05	0.63	CTGCGTGCC
682	mamo-s	BGIBMGA000966	down	580	588	+	11.2294	5.41e-05	0.65	CTGCGAGGC
683	mamo-s	BGIBMGA000967	up	845	853	-	11.5321	4.06e-05	0.615	TTGCGTGGC
684	mamo-s	BGIBMGA000969	down	1	9	-	11.7798	3.11e-05	0.615	ATGCGTGGC
685	mamo-s	BGIBMGA000969	down	1427	1435	+	10.7523	8.38e-05	0.797	AAGCGTGGC
686	mamo-s	BGIBMGA000969	up	180	188	+	10.5138	9.75e-05	0.865	GTGCGTGTT
687	mamo-s	BGIBMGA000971	down	1362	1370	+	11.3303	4.96e-05	0.615	GTGGGTGGC
688	mamo-s	BGIBMGA000971	down	342	350	-	11.2018	5.68e-05	0.674	CTGCGTGGT
689	mamo-s	BGIBMGA000972	up	1668	1676	-	11.3303	4.96e-05	0.615	GTGGGTGGC
690	mamo-s	BGIBMGA000984	up	1710	1718	-	11.3303	4.96e-05	0.615	GTGGGTGGC
691	mamo-s	BGIBMGA000986	down	334	342	-	11.3303	4.96e-05	0.615	GTGGGTGGC
692	mamo-s	BGIBMGA000987	up	1405	1413	+	11.3303	4.96e-05	0.615	GTGGGTGGC
693	mamo-s	BGIBMGA000988	up	140	148	+	12.1835	1.71e-05	0.615	GTGCGTGCC
694	mamo-s	BGIBMGA000988	down	1744	1752	-	10.5413	9.42e-05	0.857	GTGCGAGTC
695	mamo-s	BGIBMGA000989	up	96	104	-	11.3303	4.96e-05	0.615	GTGGGTGGC
696	mamo-s	BGIBMGA000990	down	1179	1187	-	12.1284	2.16e-05	0.615	CAGCGTGGC
697	mamo-s	BGIBMGA000993	down	1087	1095	-	11.3303	4.96e-05	0.615	GTGGGTGGC
698	mamo-s	BGIBMGA000994	down	1492	1500	-	11.3303	4.96e-05	0.615	GTGGGTGGC
699	mamo-s	BGIBMGA000995	down	1980	1988	+	11.0826	6.84e-05	0.709	GTACGTGGC
700	mamo-s	BGIBMGA000995	down	1416	1424	-	10.7523	8.38e-05	0.797	GGGCGTGTC
701	mamo-s	BGIBMGA000999	up	1558	1566	-	11.3303	4.96e-05	0.615	GTGGGTGGC
702	mamo-s	BGIBMGA001000	up	1704	1712	-	11.789	2.84e-05	0.615	GCGCGTGCC
703	mamo-s	BGIBMGA001001	up	1862	1870	-	11.789	2.84e-05	0.615	GCGCGTGCC
704	mamo-s	BGIBMGA001002	up	1835	1843	-	11.789	2.84e-05	0.615	GCGCGTGCC
705	mamo-s	BGIBMGA001003	up	1518	1526	-	11.5321	4.06e-05	0.615	TTGCGTGGC
706	mamo-s	BGIBMGA001003	down	745	753	-	11.3303	4.96e-05	0.615	GTGGGTGGC
707	mamo-s	BGIBMGA001006	up	1377	1385	+	11.3303	4.96e-05	0.615	GTGGGTGGC
708	mamo-s	BGIBMGA001006	up	2	10	-	11.2018	5.68e-05	0.674	CTGCGTGGT
709	mamo-s	BGIBMGA001006	up	670	678	-	10.8899	7.48e-05	0.739	CCGCGTGCC
710	mamo-s	BGIBMGA001007	up	446	454	-	11.789	2.84e-05	0.615	GCGCGTGCC
711	mamo-s	BGIBMGA001007	down	1441	1449	+	10.5688	8.88e-05	0.824	GTGCGTGAC
712	mamo-s	BGIBMGA001008	up	139	147	+	10.5688	8.88e-05	0.824	GTGCGTGAC
713	mamo-s	BGIBMGA001009	up	1578	1586	+	11.3303	4.96e-05	0.615	GTGGGTGGC
714	mamo-s	BGIBMGA001009	down	964	972	+	10.9358	7.3e-05	0.728	GCGGGTGGC
715	mamo-s	BGIBMGA001011	down	1768	1776	+	12.4679	1.31e-05	0.615	GTGCGTGTC
716	mamo-s	BGIBMGA001011	down	1624	1632	-	11.1376	6.35e-05	0.709	TCGCGTGGC
717	mamo-s	BGIBMGA001011	up	443	451	-	11.0734	7.12e-05	0.726	GAGCGTGGT
718	mamo-s	BGIBMGA001015	up	398	406	+	11.1009	6.57e-05	0.709	GAGCGAGGC
719	mamo-s	BGIBMGA001016	down	1675	1683	+	11.0734	7.12e-05	0.726	GAGCGTGGT
720	mamo-s	BGIBMGA001017	up	783	791	+	11.3303	4.96e-05	0.615	GTGGGTGGC
721	mamo-s	BGIBMGA001017	down	1432	1440	-	10.7523	8.38e-05	0.797	GGGCGTGTC
722	mamo-s	BGIBMGA001018	up	1435	1443	-	11.3303	4.96e-05	0.615	GTGGGTGGC
723	mamo-s	BGIBMGA001029	down	1818	1826	+	12.0734	2.66e-05	0.615	GCGCGTGTC
724	mamo-s	BGIBMGA001032	down	1958	1966	-	11.3303	4.96e-05	0.615	GTGGGTGGC
725	mamo-s	BGIBMGA001034	down	1394	1402	+	11.0826	6.84e-05	0.709	GTACGTGGC
726	mamo-s	BGIBMGA001034	down	779	787	-	10.6881	8.61e-05	0.81	GCACGTGGC
727	mamo-s	BGIBMGA001036	down	1027	1035	+	11.3303	4.96e-05	0.615	GTGGGTGGC
728	mamo-s	BGIBMGA001036	down	1850	1858	+	11.3303	4.96e-05	0.615	GTGGGTGGC
729	mamo-s	BGIBMGA001042	up	1282	1290	-	11.5688	3.79e-05	0.615	CTGCGTGTC
730	mamo-s	BGIBMGA001043	down	217	225	-	11.3303	4.96e-05	0.615	GTGGGTGGC
731	mamo-s	BGIBMGA001043	up	953	961	+	11.3303	4.96e-05	0.615	GTGGGTGGC
732	mamo-s	BGIBMGA001044	up	1028	1036	-	11.3303	4.96e-05	0.615	GTGGGTGGC
733	mamo-s	BGIBMGA001046	up	70	78	-	11.7339	3.29e-05	0.615	GCGCGAGGC
734	mamo-s	BGIBMGA001046	up	1112	1120	-	11.3303	4.96e-05	0.615	GTGGGTGGC
735	mamo-s	BGIBMGA001046	down	1298	1306	-	11.3303	4.96e-05	0.615	GTGGGTGGC
736	mamo-s	BGIBMGA001046	up	47	55	+	11.2018	5.68e-05	0.674	CTGCGTGGT
737	mamo-s	BGIBMGA001047	up	658	666	+	11.3303	4.96e-05	0.615	GTGGGTGGC
738	mamo-s	BGIBMGA001048	down	395	403	-	11.7064	3.52e-05	0.615	GCGCGTGGT
739	mamo-s	BGIBMGA001051	down	413	421	-	11.3303	4.96e-05	0.615	GTGGGTGGC
740	mamo-s	BGIBMGA001051	down	798	806	-	11.1743	5.9e-05	0.684	CCGCGTGTC
741	mamo-s	BGIBMGA001051	up	743	751	+	11.0826	6.84e-05	0.709	GTACGTGGC
742	mamo-s	BGIBMGA001052	down	573	581	+	12.0734	2.66e-05	0.615	GCGCGTGTC
743	mamo-s	BGIBMGA001052	down	1678	1686	+	11.1743	5.9e-05	0.684	CCGCGTGTC
744	mamo-s	BGIBMGA001053	down	1526	1534	+	12.1009	2.43e-05	0.615	GTGCGTGGT
745	mamo-s	BGIBMGA001054	down	961	969	-	11.0826	6.84e-05	0.709	GTACGTGGC
746	mamo-s	BGIBMGA001056	down	119	127	-	11.3303	4.96e-05	0.615	GTGGGTGGC
747	mamo-s	BGIBMGA001056	up	1331	1339	+	10.8349	7.66e-05	0.751	CCGCGAGGC
748	mamo-s	BGIBMGA001057	up	1780	1788	-	11.3303	4.96e-05	0.615	GTGGGTGGC
749	mamo-s	BGIBMGA001058	up	1581	1589	-	13.156	6.3e-06	0.615	CTGCGTGGC
750	mamo-s	BGIBMGA001058	up	138	146	+	11.3303	4.96e-05	0.615	GTGGGTGGC
751	mamo-s	BGIBMGA001058	up	1699	1707	+	10.9358	7.3e-05	0.728	GCGGGTGGC
752	mamo-s	BGIBMGA001058	down	1211	1219	-	10.7523	8.38e-05	0.797	AAGCGTGGC
753	mamo-s	BGIBMGA001059	down	756	764	+	14.055	2.23e-06	0.615	GTGCGTGGC
754	mamo-s	BGIBMGA001059	down	1832	1840	+	11.1009	6.57e-05	0.709	GAGCGAGGC
755	mamo-s	BGIBMGA001062	down	1067	1075	+	11.3303	4.96e-05	0.615	GTGGGTGGC
756	mamo-s	BGIBMGA001062	down	1396	1404	-	11.2844	5.18e-05	0.63	CTGCGTGCC
757	mamo-s	BGIBMGA001062	down	1796	1804	-	10.9358	7.3e-05	0.728	GCGGGTGGC
758	mamo-s	BGIBMGA001066	down	929	937	+	11.3303	4.96e-05	0.615	GTGGGTGGC
759	mamo-s	BGIBMGA001066	up	1107	1115	-	11.3303	4.96e-05	0.615	GTGGGTGGC
760	mamo-s	BGIBMGA001066	up	1565	1573	-	11.3303	4.96e-05	0.615	GTGGGTGGC
761	mamo-s	BGIBMGA001067	down	1012	1020	+	12.3394	1.49e-05	0.615	GGGCGTGGC
762	mamo-s	BGIBMGA001067	up	692	700	+	11.3853	4.74e-05	0.615	ACGCGTGGC
763	mamo-s	BGIBMGA001068	down	407	415	+	12.4679	1.31e-05	0.615	GTGCGTGTC
764	mamo-s	BGIBMGA001068	up	53	61	+	12.3394	1.49e-05	0.615	GGGCGTGGC
765	mamo-s	BGIBMGA001068	down	1276	1284	+	10.5688	8.88e-05	0.824	GTGCGTGAC
766	mamo-s	BGIBMGA001072	down	137	145	+	10.8349	7.66e-05	0.751	CCGCGAGGC
767	mamo-s	BGIBMGA001073	up	126	134	+	10.8349	7.66e-05	0.751	CCGCGAGGC
768	mamo-s	BGIBMGA001074	down	1553	1561	-	10.6881	8.61e-05	0.81	GCACGTGGC
769	mamo-s	BGIBMGA001075	up	1341	1349	-	13.6606	4.06e-06	0.615	GCGCGTGGC
770	mamo-s	BGIBMGA001075	down	592	600	+	11.2294	5.41e-05	0.65	CTGCGAGGC
771	mamo-s	BGIBMGA001079	down	67	75	+	11.7339	3.29e-05	0.615	GCGCGAGGC
772	mamo-s	BGIBMGA001079	down	1377	1385	-	10.9358	7.3e-05	0.728	GCGGGTGGC
773	mamo-s	BGIBMGA001079	up	1761	1769	+	10.8073	7.89e-05	0.766	CCGCGTGGT
774	mamo-s	BGIBMGA001083	up	1721	1729	+	11.5321	4.06e-05	0.615	TTGCGTGGC
775	mamo-s	BGIBMGA001085	down	181	189	+	10.7523	8.38e-05	0.797	AAGCGTGGC
776	mamo-s	BGIBMGA001086	up	960	968	-	11.3303	4.96e-05	0.615	GTGGGTGGC
777	mamo-s	BGIBMGA001087	up	39	47	+	13.0275	8.53e-06	0.615	GAGCGTGGC
778	mamo-s	BGIBMGA001087	down	773	781	-	11.2294	5.41e-05	0.65	CTGCGAGGC
779	mamo-s	BGIBMGA001088	up	1440	1448	-	11.0826	6.84e-05	0.709	GTACGTGGC
780	mamo-s	BGIBMGA001090	down	1498	1506	-	13.0275	8.53e-06	0.615	GAGCGTGGC
781	mamo-s	BGIBMGA001090	down	1560	1568	-	12.1284	2.16e-05	0.615	GTGCGAGGC
782	mamo-s	BGIBMGA001092	down	721	729	-	11.3303	4.96e-05	0.615	GTGGGTGGC
783	mamo-s	BGIBMGA001093	down	1449	1457	-	10.5688	8.88e-05	0.824	GTGCGTGAC
784	mamo-s	BGIBMGA001094	down	290	298	+	11.3303	4.96e-05	0.615	GTGGGTGGC
785	mamo-s	BGIBMGA001094	down	1718	1726	+	11.3303	4.96e-05	0.615	GTGGGTGGC
786	mamo-s	BGIBMGA001095	up	1061	1069	+	11.4404	4.51e-05	0.615	GAGCGTGTC
787	mamo-s	BGIBMGA001100	down	1314	1322	+	11.0826	6.84e-05	0.709	GTACGTGGC
788	mamo-s	BGIBMGA001103	down	724	732	-	11.3303	4.96e-05	0.615	GTGGGTGGC
789	mamo-s	BGIBMGA001103	down	1070	1078	-	11.1009	6.57e-05	0.709	GAGCGAGGC
790	mamo-s	BGIBMGA001105	up	172	180	-	10.8349	7.66e-05	0.751	CCGCGAGGC
791	mamo-s	BGIBMGA001106	down	149	157	+	11.0826	6.84e-05	0.709	GTACGTGGC
792	mamo-s	BGIBMGA001107	down	50	58	-	10.5138	9.75e-05	0.865	GTGCGTGTT
793	mamo-s	BGIBMGA001108	down	794	802	+	11.3303	4.96e-05	0.615	GTGGGTGGC
794	mamo-s	BGIBMGA001108	down	1779	1787	+	11.3303	4.96e-05	0.615	GTGGGTGGC
795	mamo-s	BGIBMGA001108	up	601	609	+	10.8073	7.89e-05	0.766	CCGCGTGGT
796	mamo-s	BGIBMGA001111	down	1420	1428	+	11.7064	3.52e-05	0.615	GCGCGTGGT
797	mamo-s	BGIBMGA001112	down	404	412	+	14.055	2.23e-06	0.615	GTGCGTGGC
798	mamo-s	BGIBMGA001112	down	707	715	+	12.7615	1.04e-05	0.615	CCGCGTGGC
799	mamo-s	BGIBMGA001112	up	1349	1357	+	11.4404	4.51e-05	0.615	CGGCGTGGC
800	mamo-s	BGIBMGA001112	up	1889	1897	+	11.3303	4.96e-05	0.615	GTGGGTGGC
801	mamo-s	BGIBMGA001115	up	880	888	-	11.4404	4.51e-05	0.615	GAGCGTGTC
802	mamo-s	BGIBMGA001116	up	399	407	+	11.3303	4.96e-05	0.615	GTGGGTGGC
803	mamo-s	BGIBMGA001117	up	1347	1355	-	10.6881	8.61e-05	0.81	GCACGTGGC
804	mamo-s	BGIBMGA001120	up	1045	1053	+	11.3303	4.96e-05	0.615	GTGGGTGGC
805	mamo-s	BGIBMGA001121	up	1479	1487	-	10.8073	7.89e-05	0.766	CCGCGTGGT
806	mamo-s	BGIBMGA001122	down	1471	1479	+	11.5688	3.79e-05	0.615	CTGCGTGTC
807	mamo-s	BGIBMGA001122	up	1213	1221	+	11.3303	4.96e-05	0.615	GTGGGTGGC
808	mamo-s	BGIBMGA001123	down	800	808	+	11.4404	4.51e-05	0.615	CGGCGTGGC
809	mamo-s	BGIBMGA001124	down	1171	1179	-	11.3303	4.96e-05	0.615	GTGGGTGGC
810	mamo-s	BGIBMGA001125	down	1207	1215	-	11.4404	4.51e-05	0.615	CGGCGTGGC
811	mamo-s	BGIBMGA001129	up	112	120	-	11.3303	4.96e-05	0.615	GTGGGTGGC
812	mamo-s	BGIBMGA001133	down	971	979	-	12.1835	1.71e-05	0.615	GTGCGTGCC
813	mamo-s	BGIBMGA001134	down	1490	1498	+	11.3303	4.96e-05	0.615	GTGGGTGGC
814	mamo-s	BGIBMGA001136	down	1322	1330	+	11.3303	4.96e-05	0.615	GTGGGTGGC
815	mamo-s	BGIBMGA001141	up	707	715	+	11.3303	4.96e-05	0.615	GTGGGTGGC
816	mamo-s	BGIBMGA001142	up	1252	1260	-	11.0826	6.84e-05	0.709	GTACGTGGC
817	mamo-s	BGIBMGA001142	up	585	593	+	11.0734	7.12e-05	0.726	GAGCGTGGT
818	mamo-s	BGIBMGA001145	up	397	405	+	10.7523	8.38e-05	0.797	GGGCGTGTC
819	mamo-s	BGIBMGA001146	down	1844	1852	-	11.3303	4.96e-05	0.615	GTGGGTGGC
820	mamo-s	BGIBMGA001149	up	1288	1296	+	11.2018	5.68e-05	0.674	CTGCGTGGT
821	mamo-s	BGIBMGA001150	up	1494	1502	-	11.3303	4.96e-05	0.615	GTGGGTGGC
822	mamo-s	BGIBMGA001150	up	1691	1699	-	11.3303	4.96e-05	0.615	GTGGGTGGC
823	mamo-s	BGIBMGA001151	down	576	584	+	11.3303	4.96e-05	0.615	GTGGGTGGC
824	mamo-s	BGIBMGA001152	up	1106	1114	+	11.3303	4.96e-05	0.615	GTGGGTGGC
825	mamo-s	BGIBMGA001153	up	834	842	+	12.1835	1.71e-05	0.615	GTGCGTGCC
826	mamo-s	BGIBMGA001154	down	1061	1069	-	11.0826	6.84e-05	0.709	GTACGTGGC
827	mamo-s	BGIBMGA001154	down	1625	1633	+	10.7523	8.38e-05	0.797	GGGCGTGTC
828	mamo-s	BGIBMGA001157	up	778	786	-	12.1284	2.16e-05	0.615	CAGCGTGGC
829	mamo-s	BGIBMGA001159	down	1390	1398	+	12.1284	2.16e-05	0.615	CAGCGTGGC
830	mamo-s	BGIBMGA001160	up	419	427	+	11.3303	4.96e-05	0.615	GTGGGTGGC
831	mamo-s	BGIBMGA001160	down	1652	1660	+	11.3303	4.96e-05	0.615	GTGGGTGGC
832	mamo-s	BGIBMGA001162	down	1445	1453	+	11.3303	4.96e-05	0.615	GTGGGTGGC
833	mamo-s	BGIBMGA001163	down	751	759	-	11.3303	4.96e-05	0.615	GTGGGTGGC
834	mamo-s	BGIBMGA001167	down	1301	1309	-	11.3303	4.96e-05	0.615	GTGGGTGGC
835	mamo-s	BGIBMGA001167	up	194	202	+	11.2844	5.18e-05	0.63	CTGCGTGCC
836	mamo-s	BGIBMGA001168	down	1257	1265	-	11.2294	5.41e-05	0.65	CTGCGAGGC
837	mamo-s	BGIBMGA001170	up	400	408	-	11.3303	4.96e-05	0.615	GTGGGTGGC
838	mamo-s	BGIBMGA001171	down	1964	1972	+	11.3303	4.96e-05	0.615	GTGGGTGGC
839	mamo-s	BGIBMGA001176	up	149	157	+	12.1284	2.16e-05	0.615	GTGCGAGGC
840	mamo-s	BGIBMGA001176	down	397	405	+	11.2018	5.68e-05	0.674	CTGCGTGGT
841	mamo-s	BGIBMGA001176	down	1382	1390	+	11.1009	6.57e-05	0.709	GAGCGAGGC
842	mamo-s	BGIBMGA001178	down	93	101	-	11.3303	4.96e-05	0.615	GTGGGTGGC
843	mamo-s	BGIBMGA001179	down	945	953	-	11.3303	4.96e-05	0.615	GTGGGTGGC
844	mamo-s	BGIBMGA001180	up	1786	1794	-	13.6606	4.06e-06	0.615	GCGCGTGGC
845	mamo-s	BGIBMGA001180	up	679	687	-	11.3303	4.96e-05	0.615	GTGGGTGGC
846	mamo-s	BGIBMGA001181	down	1691	1699	+	11.4404	4.51e-05	0.615	CGGCGTGGC
847	mamo-s	BGIBMGA001182	up	1427	1435	-	11.0734	7.12e-05	0.726	GAGCGTGGT
848	mamo-s	BGIBMGA001182	up	258	266	-	10.5138	9.75e-05	0.865	GTGCGTGTT
849	mamo-s	BGIBMGA001184	up	1553	1561	-	11.3303	4.96e-05	0.615	GTGGGTGGC
850	mamo-s	BGIBMGA001186	down	998	1006	-	11.4404	4.51e-05	0.615	CGGCGTGGC
851	mamo-s	BGIBMGA001186	down	1695	1703	+	11.0734	7.12e-05	0.726	GAGCGTGGT
852	mamo-s	BGIBMGA001186	down	182	190	-	10.6881	8.61e-05	0.81	GCACGTGGC
853	mamo-s	BGIBMGA001192	up	1345	1353	-	14.055	2.23e-06	0.615	GTGCGTGGC
854	mamo-s	BGIBMGA001193	down	1459	1467	+	11.1009	6.57e-05	0.709	GAGCGAGGC
855	mamo-s	BGIBMGA001195	down	1781	1789	+	12.1284	2.16e-05	0.615	GTGCGAGGC
856	mamo-s	BGIBMGA001195	up	1648	1656	+	11.3303	4.96e-05	0.615	GTGGGTGGC
857	mamo-s	BGIBMGA001196	down	884	892	+	12.1284	2.16e-05	0.615	GTGCGAGGC
858	mamo-s	BGIBMGA001196	up	1015	1023	+	11.3303	4.96e-05	0.615	GTGGGTGGC
859	mamo-s	BGIBMGA001198	down	1504	1512	-	11.0734	7.12e-05	0.726	GAGCGTGGT
860	mamo-s	BGIBMGA001200	up	1160	1168	+	11.3303	4.96e-05	0.615	GTGGGTGGC
861	mamo-s	BGIBMGA001203	down	1877	1885	+	11.0826	6.84e-05	0.709	GTACGTGGC
862	mamo-s	BGIBMGA001204	down	232	240	+	11.3303	4.96e-05	0.615	GTGGGTGGC
863	mamo-s	BGIBMGA001206	down	980	988	+	11.1009	6.57e-05	0.709	GAGCGAGGC
864	mamo-s	BGIBMGA001213	down	1779	1787	-	11.3303	4.96e-05	0.615	GTGGGTGGC
865	mamo-s	BGIBMGA001217	up	121	129	+	11.3303	4.96e-05	0.615	GTGGGTGGC
866	mamo-s	BGIBMGA001219	down	867	875	-	11.3303	4.96e-05	0.615	GTGGGTGGC
867	mamo-s	BGIBMGA001219	down	116	124	+	11.1009	6.57e-05	0.709	GAGCGAGGC
868	mamo-s	BGIBMGA001221	up	1691	1699	-	11.3303	4.96e-05	0.615	GTGGGTGGC
869	mamo-s	BGIBMGA001221	down	1303	1311	+	10.5138	9.75e-05	0.865	GTGCGTGTT
870	mamo-s	BGIBMGA001222	down	1091	1099	-	13.0275	8.53e-06	0.615	GAGCGTGGC
871	mamo-s	BGIBMGA001222	down	763	771	-	10.8349	7.66e-05	0.751	CCGCGAGGC
872	mamo-s	BGIBMGA001224	down	1342	1350	-	14.055	2.23e-06	0.615	GTGCGTGGC
873	mamo-s	BGIBMGA001224	up	492	500	-	11.3303	4.96e-05	0.615	GTGGGTGGC
874	mamo-s	BGIBMGA001224	up	1262	1270	-	11.3303	4.96e-05	0.615	GTGGGTGGC
875	mamo-s	BGIBMGA001225	down	393	401	-	11.3303	4.96e-05	0.615	GTGGGTGGC
876	mamo-s	BGIBMGA001226	up	558	566	+	11.3303	4.96e-05	0.615	GTGGGTGGC
877	mamo-s	BGIBMGA001226	up	1301	1309	-	11.3303	4.96e-05	0.615	GTGGGTGGC
878	mamo-s	BGIBMGA001226	down	44	52	-	11.2294	5.41e-05	0.65	CTGCGAGGC
879	mamo-s	BGIBMGA001227	down	424	432	+	11.3303	4.96e-05	0.615	GTGGGTGGC
880	mamo-s	BGIBMGA001228	down	493	501	-	11.3303	4.96e-05	0.615	GTGGGTGGC
881	mamo-s	BGIBMGA001229	down	669	677	-	11.3303	4.96e-05	0.615	GTGGGTGGC
882	mamo-s	BGIBMGA001230	up	1958	1966	+	12.1284	2.16e-05	0.615	GTGCGAGGC
883	mamo-s	BGIBMGA001231	down	1803	1811	+	12.1835	1.71e-05	0.615	GTGCGTGCC
884	mamo-s	BGIBMGA001231	down	1243	1251	+	11.3303	4.96e-05	0.615	GTGGGTGGC
885	mamo-s	BGIBMGA001232	up	269	277	+	12.1835	1.71e-05	0.615	GTGCGTGCC
886	mamo-s	BGIBMGA001234	up	1265	1273	-	11.5688	3.79e-05	0.615	CTGCGTGTC
887	mamo-s	BGIBMGA001234	up	1045	1053	-	11.3303	4.96e-05	0.615	GTGGGTGGC
888	mamo-s	BGIBMGA001235	up	1348	1356	-	11.3303	4.96e-05	0.615	GTGGGTGGC
889	mamo-s	BGIBMGA001238	down	1269	1277	-	11.3303	4.96e-05	0.615	GTGGGTGGC
890	mamo-s	BGIBMGA001239	down	635	643	+	11.1743	5.9e-05	0.684	CCGCGTGTC
891	mamo-s	BGIBMGA001240	up	1195	1203	+	11.1743	5.9e-05	0.684	CCGCGTGTC
892	mamo-s	BGIBMGA001242	down	1762	1770	-	11.3303	4.96e-05	0.615	GTGGGTGGC
893	mamo-s	BGIBMGA001244	down	160	168	+	14.055	2.23e-06	0.615	GTGCGTGGC
894	mamo-s	BGIBMGA001244	down	937	945	+	11.3303	4.96e-05	0.615	GTGGGTGGC
895	mamo-s	BGIBMGA001245	down	362	370	+	11.3303	4.96e-05	0.615	GTGGGTGGC
896	mamo-s	BGIBMGA001247	down	1729	1737	-	11.7339	3.29e-05	0.615	GCGCGAGGC
897	mamo-s	BGIBMGA001248	down	530	538	-	11.5321	4.06e-05	0.615	TTGCGTGGC
898	mamo-s	BGIBMGA001249	up	117	125	-	11.5321	4.06e-05	0.615	TTGCGTGGC
899	mamo-s	BGIBMGA001250	up	788	796	+	10.5413	9.42e-05	0.857	CAGCGTGTC
900	mamo-s	BGIBMGA001251	up	1958	1966	+	11.4404	4.51e-05	0.615	CGGCGTGGC
901	mamo-s	BGIBMGA001251	up	1968	1976	-	11.1376	6.35e-05	0.709	TCGCGTGGC
902	mamo-s	BGIBMGA001254	up	930	938	+	10.5138	9.75e-05	0.865	GTGCGTGTT
903	mamo-s	BGIBMGA001257	down	1441	1449	+	11.3303	4.96e-05	0.615	GTGGGTGGC
904	mamo-s	BGIBMGA001258	down	1341	1349	+	12.4679	1.31e-05	0.615	GTGCGTGTC
905	mamo-s	BGIBMGA001258	up	205	213	+	11.3303	4.96e-05	0.615	GTGGGTGGC
906	mamo-s	BGIBMGA001260	up	831	839	+	11.3853	4.74e-05	0.615	ACGCGTGGC
907	mamo-s	BGIBMGA001260	down	1213	1221	-	11.3303	4.96e-05	0.615	GTGGGTGGC
908	mamo-s	BGIBMGA001261	up	1372	1380	+	10.8899	7.48e-05	0.739	CCGCGTGCC
909	mamo-s	BGIBMGA001264	down	1096	1104	+	11.3303	4.96e-05	0.615	GTGGGTGGC
910	mamo-s	BGIBMGA001265	down	795	803	+	11.0826	6.84e-05	0.709	GTACGTGGC
911	mamo-s	BGIBMGA001266	down	1921	1929	-	11.7339	3.29e-05	0.615	GCGCGAGGC
912	mamo-s	BGIBMGA001266	down	1727	1735	-	11.5321	4.06e-05	0.615	TTGCGTGGC
913	mamo-s	BGIBMGA001266	up	486	494	+	11.3303	4.96e-05	0.615	GTGGGTGGC
914	mamo-s	BGIBMGA001268	down	1454	1462	+	11.3303	4.96e-05	0.615	GTGGGTGGC
915	mamo-s	BGIBMGA001269	up	832	840	-	11.7339	3.29e-05	0.615	GCGCGAGGC
916	mamo-s	BGIBMGA001269	up	475	483	+	11.3303	4.96e-05	0.615	GTGGGTGGC
917	mamo-s	BGIBMGA001269	down	1451	1459	+	11.3303	4.96e-05	0.615	GTGGGTGGC
918	mamo-s	BGIBMGA001270	up	574	582	-	11.3303	4.96e-05	0.615	GTGGGTGGC
919	mamo-s	BGIBMGA001271	down	1735	1743	-	10.5688	8.88e-05	0.824	GTGCGTGAC
920	mamo-s	BGIBMGA001272	down	570	578	+	11.3303	4.96e-05	0.615	GTGGGTGGC
921	mamo-s	BGIBMGA001272	up	1083	1091	-	11.3303	4.96e-05	0.615	GTGGGTGGC
922	mamo-s	BGIBMGA001273	down	641	649	-	11.3303	4.96e-05	0.615	GTGGGTGGC
923	mamo-s	BGIBMGA001273	up	1770	1778	+	11.3303	4.96e-05	0.615	GTGGGTGGC
924	mamo-s	BGIBMGA001276	down	1926	1934	-	11.3303	4.96e-05	0.615	GTGGGTGGC
925	mamo-s	BGIBMGA001277	down	1457	1465	+	11.4404	4.51e-05	0.615	GAGCGTGTC
926	mamo-s	BGIBMGA001277	up	369	377	-	11.3303	4.96e-05	0.615	GTGGGTGGC
927	mamo-s	BGIBMGA001278	down	1171	1179	-	12.1835	1.71e-05	0.615	GTGCGTGCC
928	mamo-s	BGIBMGA001278	down	1536	1544	-	11.3303	4.96e-05	0.615	GTGGGTGGC
929	mamo-s	BGIBMGA001278	down	1040	1048	-	11.1009	6.57e-05	0.709	GAGCGAGGC
930	mamo-s	BGIBMGA001278	down	449	457	+	11.0826	6.84e-05	0.709	GTACGTGGC
931	mamo-s	BGIBMGA001279	down	693	701	-	11.3303	4.96e-05	0.615	GTGGGTGGC
932	mamo-s	BGIBMGA001279	down	1833	1841	+	11.1743	5.9e-05	0.684	CCGCGTGTC
933	mamo-s	BGIBMGA001280	down	1784	1792	-	11.3303	4.96e-05	0.615	GTGGGTGGC
934	mamo-s	BGIBMGA001280	up	1117	1125	+	11.1743	5.9e-05	0.684	CCGCGTGTC
935	mamo-s	BGIBMGA001281	up	632	640	-	14.055	2.23e-06	0.615	GTGCGTGGC
936	mamo-s	BGIBMGA001282	up	692	700	+	11.3303	4.96e-05	0.615	GTGGGTGGC
937	mamo-s	BGIBMGA001283	down	1241	1249	+	13.6606	4.06e-06	0.615	GCGCGTGGC
938	mamo-s	BGIBMGA001283	down	1488	1496	+	13.6606	4.06e-06	0.615	GCGCGTGGC
939	mamo-s	BGIBMGA001283	down	797	805	-	11.3303	4.96e-05	0.615	GTGGGTGGC
940	mamo-s	BGIBMGA001289	down	1403	1411	-	11.3303	4.96e-05	0.615	GTGGGTGGC
941	mamo-s	BGIBMGA001292	up	1073	1081	+	11.3303	4.96e-05	0.615	GTGGGTGGC
942	mamo-s	BGIBMGA001293	down	1327	1335	+	11.3303	4.96e-05	0.615	GTGGGTGGC
943	mamo-s	BGIBMGA001293	up	1790	1798	+	11.3303	4.96e-05	0.615	GTGGGTGGC
944	mamo-s	BGIBMGA001294	up	1811	1819	+	11.3303	4.96e-05	0.615	GTGGGTGGC
945	mamo-s	BGIBMGA001295	down	1422	1430	-	10.5688	8.88e-05	0.824	GTGCGTGAC
946	mamo-s	BGIBMGA001296	down	1628	1636	-	11.3303	4.96e-05	0.615	GTGGGTGGC
947	mamo-s	BGIBMGA001298	up	732	740	+	11.3303	4.96e-05	0.615	GTGGGTGGC
948	mamo-s	BGIBMGA001298	down	1616	1624	-	11.0826	6.84e-05	0.709	GTACGTGGC
949	mamo-s	BGIBMGA001299	up	1803	1811	+	11.0826	6.84e-05	0.709	GTACGTGGC
950	mamo-s	BGIBMGA001300	up	1585	1593	-	11.3303	4.96e-05	0.615	GTGGGTGGC
951	mamo-s	BGIBMGA001301	up	438	446	+	13.6606	4.06e-06	0.615	GCGCGTGGC
952	mamo-s	BGIBMGA001301	up	394	402	+	11.3853	4.74e-05	0.615	ACGCGTGGC
953	mamo-s	BGIBMGA001302	up	333	341	+	11.0826	6.84e-05	0.709	GTACGTGGC
954	mamo-s	BGIBMGA001304	down	153	161	+	13.0275	8.53e-06	0.615	GAGCGTGGC
955	mamo-s	BGIBMGA001304	up	669	677	+	11.3303	4.96e-05	0.615	GTGGGTGGC
956	mamo-s	BGIBMGA001305	down	230	238	+	11.3303	4.96e-05	0.615	GTGGGTGGC
957	mamo-s	BGIBMGA001305	down	1116	1124	+	11.3303	4.96e-05	0.615	GTGGGTGGC
958	mamo-s	BGIBMGA001305	up	1221	1229	+	11.3303	4.96e-05	0.615	GTGGGTGGC
959	mamo-s	BGIBMGA001307	up	1511	1519	+	11.3303	4.96e-05	0.615	GTGGGTGGC
960	mamo-s	BGIBMGA001308	up	681	689	+	10.9358	7.3e-05	0.728	GCGGGTGGC
961	mamo-s	BGIBMGA001312	up	873	881	+	11.3303	4.96e-05	0.615	GTGGGTGGC
962	mamo-s	BGIBMGA001313	down	852	860	+	10.5413	9.42e-05	0.857	CAGCGTGTC
963	mamo-s	BGIBMGA001314	up	200	208	+	10.5413	9.42e-05	0.857	CAGCGTGTC
964	mamo-s	BGIBMGA001315	down	741	749	-	11.3303	4.96e-05	0.615	GTGGGTGGC
965	mamo-s	BGIBMGA001317	up	358	366	-	11.3303	4.96e-05	0.615	GTGGGTGGC
966	mamo-s	BGIBMGA001317	down	1268	1276	-	11.3303	4.96e-05	0.615	GTGGGTGGC
967	mamo-s	BGIBMGA001318	up	715	723	-	11.3303	4.96e-05	0.615	GTGGGTGGC
968	mamo-s	BGIBMGA001320	up	1254	1262	-	11.3303	4.96e-05	0.615	GTGGGTGGC
969	mamo-s	BGIBMGA001322	down	1805	1813	+	11.3303	4.96e-05	0.615	GTGGGTGGC
970	mamo-s	BGIBMGA001323	up	1307	1315	-	11.156	6.13e-05	0.705	GAGCGTGCC
971	mamo-s	BGIBMGA001327	up	201	209	-	11.3303	4.96e-05	0.615	GTGGGTGGC
972	mamo-s	BGIBMGA001328	up	887	895	+	11.3303	4.96e-05	0.615	GTGGGTGGC
973	mamo-s	BGIBMGA001333	up	486	494	-	11.3303	4.96e-05	0.615	GTGGGTGGC
974	mamo-s	BGIBMGA001334	up	1878	1886	-	11.7798	3.11e-05	0.615	ATGCGTGGC
975	mamo-s	BGIBMGA001335	down	1253	1261	-	11.3303	4.96e-05	0.615	GTGGGTGGC
976	mamo-s	BGIBMGA001338	up	1837	1845	+	11.3303	4.96e-05	0.615	GTGGGTGGC
977	mamo-s	BGIBMGA001338	up	1653	1661	-	11.0734	7.12e-05	0.726	GAGCGTGGT
978	mamo-s	BGIBMGA001338	down	1894	1902	+	10.8349	7.66e-05	0.751	CCGCGAGGC
979	mamo-s	BGIBMGA001339	down	1100	1108	-	11.0826	6.84e-05	0.709	GTACGTGGC
980	mamo-s	BGIBMGA001342	up	1933	1941	-	11.789	2.84e-05	0.615	GCGCGTGCC
981	mamo-s	BGIBMGA001342	up	362	370	-	11.3303	4.96e-05	0.615	GTGGGTGGC
982	mamo-s	BGIBMGA001344	down	97	105	-	11.3303	4.96e-05	0.615	GTGGGTGGC
983	mamo-s	BGIBMGA001345	up	153	161	+	11.789	2.84e-05	0.615	GCGCGTGCC
984	mamo-s	BGIBMGA001345	down	1746	1754	+	10.7523	8.38e-05	0.797	GGGCGTGTC
985	mamo-s	BGIBMGA001346	up	1873	1881	+	11.7798	3.11e-05	0.615	ATGCGTGGC
986	mamo-s	BGIBMGA001347	down	796	804	+	10.8349	7.66e-05	0.751	CCGCGAGGC
987	mamo-s	BGIBMGA001348	down	933	941	-	13.6606	4.06e-06	0.615	GCGCGTGGC
988	mamo-s	BGIBMGA001348	down	1763	1771	-	13.0275	8.53e-06	0.615	GAGCGTGGC
989	mamo-s	BGIBMGA001348	down	137	145	-	11.5688	3.79e-05	0.615	CTGCGTGTC
990	mamo-s	BGIBMGA001348	down	1173	1181	-	11.0826	6.84e-05	0.709	GTACGTGGC
991	mamo-s	BGIBMGA001349	up	1345	1353	-	13.6606	4.06e-06	0.615	GCGCGTGGC
992	mamo-s	BGIBMGA001349	up	549	557	-	11.5688	3.79e-05	0.615	CTGCGTGTC
993	mamo-s	BGIBMGA001349	up	1585	1593	-	11.0826	6.84e-05	0.709	GTACGTGGC
994	mamo-s	BGIBMGA001350	down	332	340	+	10.5413	9.42e-05	0.857	CAGCGTGTC
995	mamo-s	BGIBMGA001354	down	1712	1720	-	12.0734	2.66e-05	0.615	GCGCGTGTC
996	mamo-s	BGIBMGA001356	down	767	775	+	11.3303	4.96e-05	0.615	GTGGGTGGC
997	mamo-s	BGIBMGA001356	down	1762	1770	+	11.3303	4.96e-05	0.615	GTGGGTGGC
998	mamo-s	BGIBMGA001356	up	1761	1769	-	11.3303	4.96e-05	0.615	GTGGGTGGC
999	mamo-s	BGIBMGA001357	down	1832	1840	+	11.3303	4.96e-05	0.615	GTGGGTGGC
1000	mamo-s	BGIBMGA001357	up	1879	1887	+	11.3303	4.96e-05	0.615	GTGGGTGGC
1001	mamo-s	BGIBMGA001357	down	1286	1294	+	11.2844	5.18e-05	0.63	CTGCGTGCC
1002	mamo-s	BGIBMGA001361	up	886	894	-	11.1743	5.9e-05	0.684	CCGCGTGTC
1003	mamo-s	BGIBMGA001364	down	1145	1153	+	11.3303	4.96e-05	0.615	GTGGGTGGC
1004	mamo-s	BGIBMGA001365	up	60	68	-	12.4679	1.31e-05	0.615	GTGCGTGTC
1005	mamo-s	BGIBMGA001365	down	1712	1720	+	12.0734	2.66e-05	0.615	GCGCGTGTC
1006	mamo-s	BGIBMGA001365	up	1522	1530	+	11.3303	4.96e-05	0.615	GTGGGTGGC
1007	mamo-s	BGIBMGA001367	up	623	631	-	11.3303	4.96e-05	0.615	GTGGGTGGC
1008	mamo-s	BGIBMGA001368	down	1713	1721	-	11.3303	4.96e-05	0.615	GTGGGTGGC
1009	mamo-s	BGIBMGA001368	up	759	767	-	11.2018	5.68e-05	0.674	CTGCGTGGT
1010	mamo-s	BGIBMGA001368	down	295	303	+	11.0826	6.84e-05	0.709	GTACGTGGC
1011	mamo-s	BGIBMGA001370	up	1698	1706	-	11.3853	4.74e-05	0.615	ACGCGTGGC
1012	mamo-s	BGIBMGA001370	down	990	998	-	11.1376	6.35e-05	0.709	TCGCGTGGC
1013	mamo-s	BGIBMGA001371	down	1123	1131	+	12.1284	2.16e-05	0.615	CAGCGTGGC
1014	mamo-s	BGIBMGA001372	down	1680	1688	-	11.5321	4.06e-05	0.615	TTGCGTGGC
1015	mamo-s	BGIBMGA001373	up	336	344	+	11.3303	4.96e-05	0.615	GTGGGTGGC
1016	mamo-s	BGIBMGA001373	up	481	489	-	10.8899	7.48e-05	0.739	CCGCGTGCC
1017	mamo-s	BGIBMGA001375	down	1550	1558	+	11.3303	4.96e-05	0.615	GTGGGTGGC
1018	mamo-s	BGIBMGA001376	up	167	175	-	11.3303	4.96e-05	0.615	GTGGGTGGC
1019	mamo-s	BGIBMGA001377	up	24	32	+	11.3303	4.96e-05	0.615	GTGGGTGGC
1020	mamo-s	BGIBMGA001378	down	334	342	-	11.3303	4.96e-05	0.615	GTGGGTGGC
1021	mamo-s	BGIBMGA001379	up	374	382	-	11.3303	4.96e-05	0.615	GTGGGTGGC
1022	mamo-s	BGIBMGA001379	down	283	291	-	10.9358	7.3e-05	0.728	GCGGGTGGC
1023	mamo-s	BGIBMGA001380	down	519	527	-	11.4404	4.51e-05	0.615	GAGCGTGTC
1024	mamo-s	BGIBMGA001380	up	1933	1941	+	11.4404	4.51e-05	0.615	GAGCGTGTC
1025	mamo-s	BGIBMGA001381	up	1820	1828	-	12.0734	2.66e-05	0.615	GCGCGTGTC
1026	mamo-s	BGIBMGA001381	down	234	242	-	10.7523	8.38e-05	0.797	GGGCGTGTC
1027	mamo-s	BGIBMGA001383	up	556	564	-	11.1376	6.35e-05	0.709	TCGCGTGGC
1028	mamo-s	BGIBMGA001384	down	276	284	-	12.4679	1.31e-05	0.615	GTGCGTGTC
1029	mamo-s	BGIBMGA001388	up	790	798	+	14.055	2.23e-06	0.615	GTGCGTGGC
1030	mamo-s	BGIBMGA001389	down	163	171	-	11.3303	4.96e-05	0.615	GTGGGTGGC
1031	mamo-s	BGIBMGA001389	down	1286	1294	+	11.3303	4.96e-05	0.615	GTGGGTGGC
1032	mamo-s	BGIBMGA001391	up	285	293	+	11.3853	4.74e-05	0.615	ACGCGTGGC
1033	mamo-s	BGIBMGA001391	up	1012	1020	-	11.3303	4.96e-05	0.615	GTGGGTGGC
1034	mamo-s	BGIBMGA001392	up	360	368	+	11.3303	4.96e-05	0.615	GTGGGTGGC
1035	mamo-s	BGIBMGA001392	up	1698	1706	-	11.3303	4.96e-05	0.615	GTGGGTGGC
1036	mamo-s	BGIBMGA001392	up	242	250	+	10.8073	7.89e-05	0.766	CCGCGTGGT
1037	mamo-s	BGIBMGA001393	down	307	315	+	11.3303	4.96e-05	0.615	GTGGGTGGC
1038	mamo-s	BGIBMGA001394	up	52	60	+	11.3303	4.96e-05	0.615	GTGGGTGGC
1039	mamo-s	BGIBMGA001394	down	985	993	+	11.3303	4.96e-05	0.615	GTGGGTGGC
1040	mamo-s	BGIBMGA001395	up	759	767	-	13.0275	8.53e-06	0.615	GAGCGTGGC
1041	mamo-s	BGIBMGA001395	down	219	227	-	11.3303	4.96e-05	0.615	GTGGGTGGC
1042	mamo-s	BGIBMGA001396	up	499	507	+	11.5321	4.06e-05	0.615	TTGCGTGGC
1043	mamo-s	BGIBMGA001396	down	1063	1071	+	11.3303	4.96e-05	0.615	GTGGGTGGC
1044	mamo-s	BGIBMGA001402	down	1348	1356	+	11.5688	3.79e-05	0.615	CTGCGTGTC
1045	mamo-s	BGIBMGA001402	down	1538	1546	+	11.5688	3.79e-05	0.615	CTGCGTGTC
1046	mamo-s	BGIBMGA001402	down	1918	1926	+	11.5688	3.79e-05	0.615	CTGCGTGTC
1047	mamo-s	BGIBMGA001403	down	484	492	+	11.3303	4.96e-05	0.615	GTGGGTGGC
1048	mamo-s	BGIBMGA001404	up	1109	1117	-	11.5321	4.06e-05	0.615	TTGCGTGGC
1049	mamo-s	BGIBMGA001404	down	1419	1427	-	11.3303	4.96e-05	0.615	GTGGGTGGC
1050	mamo-s	BGIBMGA001405	down	985	993	-	10.8899	7.48e-05	0.739	CCGCGTGCC
1051	mamo-s	BGIBMGA001407	up	1844	1852	+	11.3303	4.96e-05	0.615	GTGGGTGGC
1052	mamo-s	BGIBMGA001408	up	1141	1149	+	10.8899	7.48e-05	0.739	CCGCGTGCC
1053	mamo-s	BGIBMGA001409	down	1805	1813	-	12.4679	1.31e-05	0.615	GTGCGTGTC
1054	mamo-s	BGIBMGA001409	up	887	895	+	11.0826	6.84e-05	0.709	GTACGTGGC
1055	mamo-s	BGIBMGA001410	up	1636	1644	-	11.3303	4.96e-05	0.615	GTGGGTGGC
1056	mamo-s	BGIBMGA001410	down	654	662	-	11.0826	6.84e-05	0.709	GTACGTGGC
1057	mamo-s	BGIBMGA001412	down	497	505	+	11.3303	4.96e-05	0.615	GTGGGTGGC
1058	mamo-s	BGIBMGA001412	down	1266	1274	+	11.3303	4.96e-05	0.615	GTGGGTGGC
1059	mamo-s	BGIBMGA001413	down	1263	1271	-	11.3303	4.96e-05	0.615	GTGGGTGGC
1060	mamo-s	BGIBMGA001415	down	1500	1508	-	11.3303	4.96e-05	0.615	GTGGGTGGC
1061	mamo-s	BGIBMGA001415	down	1839	1847	+	10.5138	9.75e-05	0.865	GTGCGTGTT
1062	mamo-s	BGIBMGA001416	up	930	938	+	11.3303	4.96e-05	0.615	GTGGGTGGC
1063	mamo-s	BGIBMGA001417	up	873	881	+	11.3303	4.96e-05	0.615	GTGGGTGGC
1064	mamo-s	BGIBMGA001419	up	244	252	-	11.3303	4.96e-05	0.615	GTGGGTGGC
1065	mamo-s	BGIBMGA001419	down	1362	1370	-	11.3303	4.96e-05	0.615	GTGGGTGGC
1066	mamo-s	BGIBMGA001419	down	1469	1477	-	10.9358	7.3e-05	0.728	GCGGGTGGC
1067	mamo-s	BGIBMGA001420	down	1832	1840	-	11.3303	4.96e-05	0.615	GTGGGTGGC
1068	mamo-s	BGIBMGA001421	down	1434	1442	-	11.4404	4.51e-05	0.615	CGGCGTGGC
1069	mamo-s	BGIBMGA001424	down	1780	1788	-	11.3303	4.96e-05	0.615	GTGGGTGGC
1070	mamo-s	BGIBMGA001432	up	236	244	+	10.7523	8.38e-05	0.797	AAGCGTGGC
1071	mamo-s	BGIBMGA001438	down	878	886	-	11.3303	4.96e-05	0.615	GTGGGTGGC
1072	mamo-s	BGIBMGA001438	up	1107	1115	+	11.3303	4.96e-05	0.615	GTGGGTGGC
1073	mamo-s	BGIBMGA001438	down	1897	1905	+	10.7523	8.38e-05	0.797	GGGCGTGTC
1074	mamo-s	BGIBMGA001439	down	1408	1416	+	11.3303	4.96e-05	0.615	GTGGGTGGC
1075	mamo-s	BGIBMGA001440	down	201	209	-	11.7339	3.29e-05	0.615	GCGCGAGGC
1076	mamo-s	BGIBMGA001440	down	279	287	-	11.7339	3.29e-05	0.615	GCGCGAGGC
1077	mamo-s	BGIBMGA001440	up	1932	1940	+	11.5688	3.79e-05	0.615	CTGCGTGTC
1078	mamo-s	BGIBMGA001440	up	1215	1223	-	11.3303	4.96e-05	0.615	GTGGGTGGC
1079	mamo-s	BGIBMGA001440	down	1886	1894	+	11.3303	4.96e-05	0.615	GTGGGTGGC
1080	mamo-s	BGIBMGA001443	up	36	44	+	11.3303	4.96e-05	0.615	GTGGGTGGC
1081	mamo-s	BGIBMGA001444	up	850	858	-	11.3303	4.96e-05	0.615	GTGGGTGGC
1082	mamo-s	BGIBMGA001444	up	1331	1339	+	11.3303	4.96e-05	0.615	GTGGGTGGC
1083	mamo-s	BGIBMGA001445	down	1546	1554	-	11.3303	4.96e-05	0.615	GTGGGTGGC
1084	mamo-s	BGIBMGA001445	down	1290	1298	+	10.5138	9.75e-05	0.865	GTGCGTGTT
1085	mamo-s	BGIBMGA001446	up	90	98	-	11.3303	4.96e-05	0.615	GTGGGTGGC
1086	mamo-s	BGIBMGA001446	down	1656	1664	+	11.3303	4.96e-05	0.615	GTGGGTGGC
1087	mamo-s	BGIBMGA001447	down	1146	1154	-	11.1743	5.9e-05	0.684	CCGCGTGTC
1088	mamo-s	BGIBMGA001447	up	1745	1753	-	10.8899	7.48e-05	0.739	CCGCGTGCC
1089	mamo-s	BGIBMGA001448	up	300	308	+	11.3303	4.96e-05	0.615	GTGGGTGGC
1090	mamo-s	BGIBMGA001448	down	1691	1699	-	11.3303	4.96e-05	0.615	GTGGGTGGC
1091	mamo-s	BGIBMGA001449	up	483	491	-	11.3303	4.96e-05	0.615	GTGGGTGGC
1092	mamo-s	BGIBMGA001449	up	719	727	+	11.3303	4.96e-05	0.615	GTGGGTGGC
1093	mamo-s	BGIBMGA001451	down	216	224	-	11.3303	4.96e-05	0.615	GTGGGTGGC
1094	mamo-s	BGIBMGA001451	up	268	276	-	10.6881	8.61e-05	0.81	GCACGTGGC
1095	mamo-s	BGIBMGA001451	down	592	600	-	10.5138	9.75e-05	0.865	GTGCGTGTT
1096	mamo-s	BGIBMGA001453	down	669	677	+	11.3303	4.96e-05	0.615	GTGGGTGGC
1097	mamo-s	BGIBMGA001453	up	1470	1478	+	11.3303	4.96e-05	0.615	GTGGGTGGC
1098	mamo-s	BGIBMGA001455	up	1146	1154	-	11.0826	6.84e-05	0.709	GTACGTGGC
1099	mamo-s	BGIBMGA001456	up	715	723	-	12.4679	1.31e-05	0.615	GTGCGTGTC
1100	mamo-s	BGIBMGA001456	up	834	842	-	12.4679	1.31e-05	0.615	GTGCGTGTC
1101	mamo-s	BGIBMGA001456	up	680	688	+	11.4404	4.51e-05	0.615	CGGCGTGGC
1102	mamo-s	BGIBMGA001456	down	1459	1467	-	11.3303	4.96e-05	0.615	GTGGGTGGC
1103	mamo-s	BGIBMGA001456	down	1597	1605	-	11.1009	6.57e-05	0.709	GAGCGAGGC
1104	mamo-s	BGIBMGA001456	down	1730	1738	-	11.1009	6.57e-05	0.709	GAGCGAGGC
1105	mamo-s	BGIBMGA001456	down	1834	1842	+	10.5138	9.75e-05	0.865	GTGCGTGTT
1106	mamo-s	BGIBMGA001457	up	1232	1240	+	11.3303	4.96e-05	0.615	GTGGGTGGC
1107	mamo-s	BGIBMGA001461	down	1774	1782	-	11.3303	4.96e-05	0.615	GTGGGTGGC
1108	mamo-s	BGIBMGA001462	down	920	928	-	11.3303	4.96e-05	0.615	GTGGGTGGC
1109	mamo-s	BGIBMGA001464	down	1203	1211	-	11.0826	6.84e-05	0.709	GTACGTGGC
1110	mamo-s	BGIBMGA001466	up	1412	1420	+	11.3303	4.96e-05	0.615	GTGGGTGGC
1111	mamo-s	BGIBMGA001469	up	860	868	-	11.3303	4.96e-05	0.615	GTGGGTGGC
1112	mamo-s	BGIBMGA001470	up	555	563	-	11.3303	4.96e-05	0.615	GTGGGTGGC
1113	mamo-s	BGIBMGA001472	up	1081	1089	+	11.1743	5.9e-05	0.684	CCGCGTGTC
1114	mamo-s	BGIBMGA001473	up	285	293	-	11.3303	4.96e-05	0.615	GTGGGTGGC
1115	mamo-s	BGIBMGA001474	down	951	959	+	11.0826	6.84e-05	0.709	GTACGTGGC
1116	mamo-s	BGIBMGA001477	down	625	633	+	10.5688	8.88e-05	0.824	GTGCGTGAC
1117	mamo-s	BGIBMGA001479	down	1819	1827	+	11.3303	4.96e-05	0.615	GTGGGTGGC
1118	mamo-s	BGIBMGA001479	down	1167	1175	-	11.2844	5.18e-05	0.63	CTGCGTGCC
1119	mamo-s	BGIBMGA001479	down	1382	1390	-	10.7523	8.38e-05	0.797	AAGCGTGGC
1120	mamo-s	BGIBMGA001480	down	389	397	+	13.0275	8.53e-06	0.615	GAGCGTGGC
1121	mamo-s	BGIBMGA001480	down	951	959	+	11.3303	4.96e-05	0.615	GTGGGTGGC
1122	mamo-s	BGIBMGA001480	up	1249	1257	-	11.3303	4.96e-05	0.615	GTGGGTGGC
1123	mamo-s	BGIBMGA001482	down	1691	1699	-	11.3303	4.96e-05	0.615	GTGGGTGGC
1124	mamo-s	BGIBMGA001484	down	1414	1422	+	10.5138	9.75e-05	0.865	GTGCGTGTT
1125	mamo-s	BGIBMGA001485	down	170	178	+	12.1009	2.43e-05	0.615	GTGCGTGGT
1126	mamo-s	BGIBMGA001485	up	1787	1795	-	12.1009	2.43e-05	0.615	GTGCGTGGT
1127	mamo-s	BGIBMGA001485	down	1798	1806	-	11.5321	4.06e-05	0.615	TTGCGTGGC
1128	mamo-s	BGIBMGA001485	up	1172	1180	+	11.3303	4.96e-05	0.615	GTGGGTGGC
1129	mamo-s	BGIBMGA001486	down	1858	1866	-	14.055	2.23e-06	0.615	GTGCGTGGC
1130	mamo-s	BGIBMGA001486	up	675	683	+	11.3303	4.96e-05	0.615	GTGGGTGGC
1131	mamo-s	BGIBMGA001486	up	1279	1287	+	11.3303	4.96e-05	0.615	GTGGGTGGC
1132	mamo-s	BGIBMGA001487	up	406	414	+	11.3303	4.96e-05	0.615	GTGGGTGGC
1133	mamo-s	BGIBMGA001493	up	928	936	+	11.3303	4.96e-05	0.615	GTGGGTGGC
1134	mamo-s	BGIBMGA001495	down	497	505	-	11.0734	7.12e-05	0.726	GAGCGTGGT
1135	mamo-s	BGIBMGA001496	up	1242	1250	-	10.8073	7.89e-05	0.766	CCGCGTGGT
1136	mamo-s	BGIBMGA001498	down	1751	1759	-	10.8349	7.66e-05	0.751	CCGCGAGGC
1137	mamo-s	BGIBMGA001499	up	853	861	-	11.3303	4.96e-05	0.615	GTGGGTGGC
1138	mamo-s	BGIBMGA001502	up	340	348	-	11.3303	4.96e-05	0.615	GTGGGTGGC
1139	mamo-s	BGIBMGA001502	down	383	391	+	11.3303	4.96e-05	0.615	GTGGGTGGC
1140	mamo-s	BGIBMGA001502	up	1024	1032	-	11.3303	4.96e-05	0.615	GTGGGTGGC
1141	mamo-s	BGIBMGA001504	down	435	443	-	11.7064	3.52e-05	0.615	GCGCGTGGT
1142	mamo-s	BGIBMGA001504	down	1755	1763	-	10.5413	9.42e-05	0.857	CAGCGTGTC
1143	mamo-s	BGIBMGA001506	up	1624	1632	+	11.0826	6.84e-05	0.709	GTACGTGGC
1144	mamo-s	BGIBMGA001508	down	299	307	+	12.3394	1.49e-05	0.615	GGGCGTGGC
1145	mamo-s	BGIBMGA001510	up	1095	1103	+	13.156	6.3e-06	0.615	CTGCGTGGC
1146	mamo-s	BGIBMGA001510	up	699	707	-	11.3303	4.96e-05	0.615	GTGGGTGGC
1147	mamo-s	BGIBMGA001510	up	1237	1245	+	11.3303	4.96e-05	0.615	GTGGGTGGC
1148	mamo-s	BGIBMGA001511	up	976	984	+	11.3303	4.96e-05	0.615	GTGGGTGGC
1149	mamo-s	BGIBMGA001512	up	1740	1748	-	11.3303	4.96e-05	0.615	GTGGGTGGC
1150	mamo-s	BGIBMGA001513	down	1123	1131	-	11.3303	4.96e-05	0.615	GTGGGTGGC
1151	mamo-s	BGIBMGA001515	up	1360	1368	-	11.3303	4.96e-05	0.615	GTGGGTGGC
1152	mamo-s	BGIBMGA001516	up	621	629	+	11.3303	4.96e-05	0.615	GTGGGTGGC
1153	mamo-s	BGIBMGA001518	up	384	392	+	11.3303	4.96e-05	0.615	GTGGGTGGC
1154	mamo-s	BGIBMGA001519	down	1553	1561	-	11.4404	4.51e-05	0.615	CGGCGTGGC
1155	mamo-s	BGIBMGA001519	down	746	754	+	11.3303	4.96e-05	0.615	GTGGGTGGC
1156	mamo-s	BGIBMGA001519	down	1143	1151	+	11.2294	5.41e-05	0.65	CTGCGAGGC
1157	mamo-s	BGIBMGA001522	down	1055	1063	+	11.3303	4.96e-05	0.615	GTGGGTGGC
1158	mamo-s	BGIBMGA001522	up	411	419	-	11.0734	7.12e-05	0.726	GAGCGTGGT
1159	mamo-s	BGIBMGA001524	up	1055	1063	-	11.3303	4.96e-05	0.615	GTGGGTGGC
1160	mamo-s	BGIBMGA001524	up	217	225	-	10.9358	7.3e-05	0.728	GCGGGTGGC
1161	mamo-s	BGIBMGA001525	down	1453	1461	-	11.3303	4.96e-05	0.615	GTGGGTGGC
1162	mamo-s	BGIBMGA001526	down	74	82	+	11.0734	7.12e-05	0.726	GAGCGTGGT
1163	mamo-s	BGIBMGA001527	up	1686	1694	+	11.2018	5.68e-05	0.674	CTGCGTGGT
1164	mamo-s	BGIBMGA001529	up	1542	1550	-	11.7064	3.52e-05	0.615	GCGCGTGGT
1165	mamo-s	BGIBMGA001530	up	1714	1722	-	11.3303	4.96e-05	0.615	GTGGGTGGC
1166	mamo-s	BGIBMGA001531	up	1615	1623	+	11.3303	4.96e-05	0.615	GTGGGTGGC
1167	mamo-s	BGIBMGA001531	up	276	284	-	11.0826	6.84e-05	0.709	GTACGTGGC
1168	mamo-s	BGIBMGA001534	up	206	214	+	11.3303	4.96e-05	0.615	GTGGGTGGC
1169	mamo-s	BGIBMGA001534	up	1395	1403	-	11.3303	4.96e-05	0.615	GTGGGTGGC
1170	mamo-s	BGIBMGA001541	down	1019	1027	-	11.3303	4.96e-05	0.615	GTGGGTGGC
1171	mamo-s	BGIBMGA001544	up	1505	1513	-	12.1284	2.16e-05	0.615	GTGCGAGGC
1172	mamo-s	BGIBMGA001545	up	1742	1750	+	11.3303	4.96e-05	0.615	GTGGGTGGC
1173	mamo-s	BGIBMGA001552	up	716	724	+	11.3303	4.96e-05	0.615	GTGGGTGGC
1174	mamo-s	BGIBMGA001552	up	1610	1618	+	11.3303	4.96e-05	0.615	GTGGGTGGC
1175	mamo-s	BGIBMGA001554	down	852	860	+	11.2844	5.18e-05	0.63	CTGCGTGCC
1176	mamo-s	BGIBMGA001555	down	341	349	+	11.0734	7.12e-05	0.726	GAGCGTGGT
1177	mamo-s	BGIBMGA001556	down	1854	1862	-	11.3303	4.96e-05	0.615	GTGGGTGGC
1178	mamo-s	BGIBMGA001557	down	280	288	+	11.1376	6.35e-05	0.709	TCGCGTGGC
1179	mamo-s	BGIBMGA001559	up	330	338	-	12.7615	1.04e-05	0.615	CCGCGTGGC
1180	mamo-s	BGIBMGA001559	up	757	765	+	10.5138	9.75e-05	0.865	GTGCGTGTT
1181	mamo-s	BGIBMGA001561	down	1524	1532	+	11.3303	4.96e-05	0.615	GTGGGTGGC
1182	mamo-s	BGIBMGA001561	down	731	739	+	11.0826	6.84e-05	0.709	GTACGTGGC
1183	mamo-s	BGIBMGA001562	down	348	356	-	11.7798	3.11e-05	0.615	ATGCGTGGC
1184	mamo-s	BGIBMGA001562	up	569	577	+	11.3303	4.96e-05	0.615	GTGGGTGGC
1185	mamo-s	BGIBMGA001562	up	904	912	-	11.3303	4.96e-05	0.615	GTGGGTGGC
1186	mamo-s	BGIBMGA001562	up	1090	1098	-	11.3303	4.96e-05	0.615	GTGGGTGGC
1187	mamo-s	BGIBMGA001562	down	1918	1926	+	11.3303	4.96e-05	0.615	GTGGGTGGC
1188	mamo-s	BGIBMGA001564	down	1600	1608	-	11.0826	6.84e-05	0.709	GTACGTGGC
1189	mamo-s	BGIBMGA001565	up	1857	1865	+	11.7339	3.29e-05	0.615	GCGCGAGGC
1190	mamo-s	BGIBMGA001565	up	257	265	+	11.3303	4.96e-05	0.615	GTGGGTGGC
1191	mamo-s	BGIBMGA001566	down	1664	1672	-	12.0734	2.66e-05	0.615	GCGCGTGTC
1192	mamo-s	BGIBMGA001566	down	264	272	-	11.3303	4.96e-05	0.615	GTGGGTGGC
1193	mamo-s	BGIBMGA001568	up	78	86	+	11.3303	4.96e-05	0.615	GTGGGTGGC
1194	mamo-s	BGIBMGA001573	down	1106	1114	+	11.3303	4.96e-05	0.615	GTGGGTGGC
1195	mamo-s	BGIBMGA001574	down	820	828	-	11.3303	4.96e-05	0.615	GTGGGTGGC
1196	mamo-s	BGIBMGA001577	down	646	654	-	11.5688	3.79e-05	0.615	CTGCGTGTC
1197	mamo-s	BGIBMGA001577	down	1216	1224	-	11.5688	3.79e-05	0.615	CTGCGTGTC
1198	mamo-s	BGIBMGA001578	down	1572	1580	-	11.3303	4.96e-05	0.615	GTGGGTGGC
1199	mamo-s	BGIBMGA001579	down	1448	1456	+	10.5138	9.75e-05	0.865	GTGCGTGTT
1200	mamo-s	BGIBMGA001580	up	1014	1022	-	11.3303	4.96e-05	0.615	GTGGGTGGC
1201	mamo-s	BGIBMGA001580	down	1066	1074	-	11.3303	4.96e-05	0.615	GTGGGTGGC
1202	mamo-s	BGIBMGA001581	down	609	617	-	11.3303	4.96e-05	0.615	GTGGGTGGC
1203	mamo-s	BGIBMGA001582	up	1820	1828	+	11.3303	4.96e-05	0.615	GTGGGTGGC
1204	mamo-s	BGIBMGA001583	down	1621	1629	+	14.055	2.23e-06	0.615	GTGCGTGGC
1205	mamo-s	BGIBMGA001583	down	1174	1182	+	11.3303	4.96e-05	0.615	GTGGGTGGC
1206	mamo-s	BGIBMGA001584	up	1905	1913	+	11.1009	6.57e-05	0.709	GAGCGAGGC
1207	mamo-s	BGIBMGA001584	up	1061	1069	+	10.8073	7.89e-05	0.766	CCGCGTGGT
1208	mamo-s	BGIBMGA001584	down	1551	1559	+	10.5413	9.42e-05	0.857	GTGCGAGTC
1209	mamo-s	BGIBMGA001585	down	1221	1229	-	11.3303	4.96e-05	0.615	GTGGGTGGC
1210	mamo-s	BGIBMGA001585	down	1440	1448	+	11.3303	4.96e-05	0.615	GTGGGTGGC
1211	mamo-s	BGIBMGA001586	down	1705	1713	-	11.3303	4.96e-05	0.615	GTGGGTGGC
1212	mamo-s	BGIBMGA001587	down	1080	1088	-	11.7339	3.29e-05	0.615	GCGCGAGGC
1213	mamo-s	BGIBMGA001587	down	430	438	-	11.3303	4.96e-05	0.615	GTGGGTGGC
1214	mamo-s	BGIBMGA001589	down	925	933	+	11.3303	4.96e-05	0.615	GTGGGTGGC
1215	mamo-s	BGIBMGA001592	up	872	880	-	10.5688	8.88e-05	0.824	GTGCGTGAC
1216	mamo-s	BGIBMGA001594	up	1504	1512	-	11.3303	4.96e-05	0.615	GTGGGTGGC
1217	mamo-s	BGIBMGA001595	up	54	62	+	13.0275	8.53e-06	0.615	GAGCGTGGC
1218	mamo-s	BGIBMGA001595	down	1934	1942	-	11.7339	3.29e-05	0.615	GCGCGAGGC
1219	mamo-s	BGIBMGA001595	down	1911	1919	+	11.5321	4.06e-05	0.615	TTGCGTGGC
1220	mamo-s	BGIBMGA001595	down	873	881	-	11.3303	4.96e-05	0.615	GTGGGTGGC
1221	mamo-s	BGIBMGA001596	down	978	986	-	11.3303	4.96e-05	0.615	GTGGGTGGC
1222	mamo-s	BGIBMGA001597	down	735	743	+	11.3303	4.96e-05	0.615	GTGGGTGGC
1223	mamo-s	BGIBMGA001598	up	302	310	+	11.5321	4.06e-05	0.615	TTGCGTGGC
1224	mamo-s	BGIBMGA001598	up	1552	1560	+	11.0826	6.84e-05	0.709	GTACGTGGC
1225	mamo-s	BGIBMGA001599	up	1533	1541	+	11.3303	4.96e-05	0.615	GTGGGTGGC
1226	mamo-s	BGIBMGA001600	up	198	206	+	11.3303	4.96e-05	0.615	GTGGGTGGC
1227	mamo-s	BGIBMGA001600	down	510	518	+	11.3303	4.96e-05	0.615	GTGGGTGGC
1228	mamo-s	BGIBMGA001600	down	1260	1268	+	11.3303	4.96e-05	0.615	GTGGGTGGC
1229	mamo-s	BGIBMGA001602	up	413	421	-	14.055	2.23e-06	0.615	GTGCGTGGC
1230	mamo-s	BGIBMGA001606	down	636	644	-	11.3303	4.96e-05	0.615	GTGGGTGGC
1231	mamo-s	BGIBMGA001606	down	1835	1843	+	11.3303	4.96e-05	0.615	GTGGGTGGC
1232	mamo-s	BGIBMGA001607	up	137	145	+	11.3303	4.96e-05	0.615	GTGGGTGGC
1233	mamo-s	BGIBMGA001610	up	783	791	+	13.0275	8.53e-06	0.615	GAGCGTGGC
1234	mamo-s	BGIBMGA001613	up	155	163	+	11.3303	4.96e-05	0.615	GTGGGTGGC
1235	mamo-s	BGIBMGA001613	up	663	671	-	11.3303	4.96e-05	0.615	GTGGGTGGC
1236	mamo-s	BGIBMGA001614	down	1370	1378	-	11.3303	4.96e-05	0.615	GTGGGTGGC
1237	mamo-s	BGIBMGA001615	up	1984	1992	-	10.5138	9.75e-05	0.865	GTGCGTGTT
1238	mamo-s	BGIBMGA001617	down	820	828	-	11.3303	4.96e-05	0.615	GTGGGTGGC
1239	mamo-s	BGIBMGA001618	up	1059	1067	+	11.3303	4.96e-05	0.615	GTGGGTGGC
1240	mamo-s	BGIBMGA001618	down	1405	1413	+	10.5138	9.75e-05	0.865	GTGCGTGTT
1241	mamo-s	BGIBMGA001619	up	670	678	+	11.789	2.84e-05	0.615	GCGCGTGCC
1242	mamo-s	BGIBMGA001624	up	1107	1115	-	11.7064	3.52e-05	0.615	GCGCGTGGT
1243	mamo-s	BGIBMGA001627	up	1959	1967	+	13.6606	4.06e-06	0.615	GCGCGTGGC
1244	mamo-s	BGIBMGA001631	down	1096	1104	+	11.3303	4.96e-05	0.615	GTGGGTGGC
1245	mamo-s	BGIBMGA001631	up	1800	1808	-	11.3303	4.96e-05	0.615	GTGGGTGGC
1246	mamo-s	BGIBMGA001631	down	848	856	-	11.1009	6.57e-05	0.709	GAGCGAGGC
1247	mamo-s	BGIBMGA001634	up	212	220	+	11.3303	4.96e-05	0.615	GTGGGTGGC
1248	mamo-s	BGIBMGA001635	down	987	995	-	11.3303	4.96e-05	0.615	GTGGGTGGC
1249	mamo-s	BGIBMGA001636	up	1077	1085	-	11.3303	4.96e-05	0.615	GTGGGTGGC
1250	mamo-s	BGIBMGA001637	up	961	969	-	11.3303	4.96e-05	0.615	GTGGGTGGC
1251	mamo-s	BGIBMGA001640	up	938	946	-	11.3303	4.96e-05	0.615	GTGGGTGGC
1252	mamo-s	BGIBMGA001640	down	1178	1186	+	11.3303	4.96e-05	0.615	GTGGGTGGC
1253	mamo-s	BGIBMGA001641	down	465	473	+	11.3303	4.96e-05	0.615	GTGGGTGGC
1254	mamo-s	BGIBMGA001641	up	1261	1269	-	11.2844	5.18e-05	0.63	CTGCGTGCC
1255	mamo-s	BGIBMGA001641	up	918	926	+	11.0826	6.84e-05	0.709	GTACGTGGC
1256	mamo-s	BGIBMGA001642	up	1888	1896	+	11.3303	4.96e-05	0.615	GTGGGTGGC
1257	mamo-s	BGIBMGA001644	up	1704	1712	+	13.156	6.3e-06	0.615	CTGCGTGGC
1258	mamo-s	BGIBMGA001645	down	1905	1913	-	11.3303	4.96e-05	0.615	GTGGGTGGC
1259	mamo-s	BGIBMGA001646	up	596	604	-	11.3303	4.96e-05	0.615	GTGGGTGGC
1260	mamo-s	BGIBMGA001647	up	804	812	+	11.3303	4.96e-05	0.615	GTGGGTGGC
1261	mamo-s	BGIBMGA001648	up	1226	1234	-	11.3303	4.96e-05	0.615	GTGGGTGGC
1262	mamo-s	BGIBMGA001649	down	1250	1258	-	11.789	2.84e-05	0.615	GCGCGTGCC
1263	mamo-s	BGIBMGA001649	down	1965	1973	-	11.3853	4.74e-05	0.615	ACGCGTGGC
1264	mamo-s	BGIBMGA001650	up	1489	1497	+	11.3303	4.96e-05	0.615	GTGGGTGGC
1265	mamo-s	BGIBMGA001651	up	564	572	-	11.3303	4.96e-05	0.615	GTGGGTGGC
1266	mamo-s	BGIBMGA001651	up	1530	1538	+	11.3303	4.96e-05	0.615	GTGGGTGGC
1267	mamo-s	BGIBMGA001651	up	199	207	+	10.7523	8.38e-05	0.797	AAGCGTGGC
1268	mamo-s	BGIBMGA001652	up	1225	1233	+	11.3303	4.96e-05	0.615	GTGGGTGGC
1269	mamo-s	BGIBMGA001652	up	684	692	+	11.0826	6.84e-05	0.709	GTACGTGGC
1270	mamo-s	BGIBMGA001655	up	784	792	-	11.3303	4.96e-05	0.615	GTGGGTGGC
1271	mamo-s	BGIBMGA001656	up	1989	1997	-	10.5413	9.42e-05	0.857	GTGCGAGTC
1272	mamo-s	BGIBMGA001657	down	1419	1427	+	11.3303	4.96e-05	0.615	GTGGGTGGC
1273	mamo-s	BGIBMGA001658	down	688	696	-	11.3303	4.96e-05	0.615	GTGGGTGGC
1274	mamo-s	BGIBMGA001659	down	1219	1227	+	14.055	2.23e-06	0.615	GTGCGTGGC
1275	mamo-s	BGIBMGA001659	down	479	487	+	11.3303	4.96e-05	0.615	GTGGGTGGC
1276	mamo-s	BGIBMGA001659	down	1563	1571	+	10.5138	9.75e-05	0.865	GTGCGTGTT
1277	mamo-s	BGIBMGA001660	down	586	594	-	11.0826	6.84e-05	0.709	GTACGTGGC
1278	mamo-s	BGIBMGA001661	up	1013	1021	-	11.3303	4.96e-05	0.615	GTGGGTGGC
1279	mamo-s	BGIBMGA001662	up	502	510	+	12.1284	2.16e-05	0.615	GTGCGAGGC
1280	mamo-s	BGIBMGA001663	down	798	806	-	11.7798	3.11e-05	0.615	ATGCGTGGC
1281	mamo-s	BGIBMGA001664	down	1835	1843	+	11.0826	6.84e-05	0.709	GTACGTGGC
1282	mamo-s	BGIBMGA001665	down	445	453	-	11.3303	4.96e-05	0.615	GTGGGTGGC
1283	mamo-s	BGIBMGA001665	down	913	921	+	11.3303	4.96e-05	0.615	GTGGGTGGC
1284	mamo-s	BGIBMGA001666	up	897	905	-	11.3303	4.96e-05	0.615	GTGGGTGGC
1285	mamo-s	BGIBMGA001666	down	1246	1254	-	11.3303	4.96e-05	0.615	GTGGGTGGC
1286	mamo-s	BGIBMGA001666	up	1365	1373	+	11.3303	4.96e-05	0.615	GTGGGTGGC
1287	mamo-s	BGIBMGA001668	up	1429	1437	+	11.156	6.13e-05	0.705	GAGCGTGCC
1288	mamo-s	BGIBMGA001670	down	389	397	-	11.3303	4.96e-05	0.615	GTGGGTGGC
1289	mamo-s	BGIBMGA001670	up	929	937	+	10.8073	7.89e-05	0.766	CCGCGTGGT
1290	mamo-s	BGIBMGA001670	up	206	214	+	10.5138	9.75e-05	0.865	GTGCGTGTT
1291	mamo-s	BGIBMGA001671	down	289	297	-	10.9358	7.3e-05	0.728	GCGGGTGGC
1292	mamo-s	BGIBMGA001674	up	1023	1031	-	11.7798	3.11e-05	0.615	ATGCGTGGC
1293	mamo-s	BGIBMGA001675	down	1332	1340	-	12.1284	2.16e-05	0.615	CAGCGTGGC
1294	mamo-s	BGIBMGA001676	up	940	948	-	11.3303	4.96e-05	0.615	GTGGGTGGC
1295	mamo-s	BGIBMGA001678	down	1337	1345	-	14.055	2.23e-06	0.615	GTGCGTGGC
1296	mamo-s	BGIBMGA001679	down	1551	1559	+	11.3303	4.96e-05	0.615	GTGGGTGGC
1297	mamo-s	BGIBMGA001680	down	1688	1696	-	11.3303	4.96e-05	0.615	GTGGGTGGC
1298	mamo-s	BGIBMGA001683	down	1342	1350	-	11.3303	4.96e-05	0.615	GTGGGTGGC
1299	mamo-s	BGIBMGA001683	up	1734	1742	+	11.3303	4.96e-05	0.615	GTGGGTGGC
1300	mamo-s	BGIBMGA001683	down	1544	1552	+	10.8899	7.48e-05	0.739	CCGCGTGCC
1301	mamo-s	BGIBMGA001685	down	1632	1640	+	11.3303	4.96e-05	0.615	GTGGGTGGC
1302	mamo-s	BGIBMGA001685	down	456	464	+	11.0826	6.84e-05	0.709	GTACGTGGC
1303	mamo-s	BGIBMGA001686	down	1644	1652	+	11.0826	6.84e-05	0.709	GTACGTGGC
1304	mamo-s	BGIBMGA001686	down	791	799	+	11.0734	7.12e-05	0.726	GAGCGTGGT
1305	mamo-s	BGIBMGA001687	down	464	472	+	11.4404	4.51e-05	0.615	CGGCGTGGC
1306	mamo-s	BGIBMGA001687	up	1685	1693	+	11.3303	4.96e-05	0.615	GTGGGTGGC
1307	mamo-s	BGIBMGA001687	down	453	461	-	11.2018	5.68e-05	0.674	CTGCGTGGT
1308	mamo-s	BGIBMGA001688	down	1764	1772	+	11.3303	4.96e-05	0.615	GTGGGTGGC
1309	mamo-s	BGIBMGA001689	up	1062	1070	+	11.3303	4.96e-05	0.615	GTGGGTGGC
1310	mamo-s	BGIBMGA001691	down	1182	1190	-	11.3303	4.96e-05	0.615	GTGGGTGGC
1311	mamo-s	BGIBMGA001691	up	1263	1271	-	11.3303	4.96e-05	0.615	GTGGGTGGC
1312	mamo-s	BGIBMGA001693	down	590	598	-	11.789	2.84e-05	0.615	GCGCGTGCC
1313	mamo-s	BGIBMGA001693	down	1686	1694	-	11.3303	4.96e-05	0.615	GTGGGTGGC
1314	mamo-s	BGIBMGA001695	up	538	546	-	11.3303	4.96e-05	0.615	GTGGGTGGC
1315	mamo-s	BGIBMGA001697	down	1814	1822	-	11.0826	6.84e-05	0.709	GTACGTGGC
1316	mamo-s	BGIBMGA001700	up	64	72	+	12.0734	2.66e-05	0.615	GCGCGTGTC
1317	mamo-s	BGIBMGA001700	down	1123	1131	+	11.3303	4.96e-05	0.615	GTGGGTGGC
1318	mamo-s	BGIBMGA001701	up	52	60	+	11.3303	4.96e-05	0.615	GTGGGTGGC
1319	mamo-s	BGIBMGA001703	down	1276	1284	-	11.5688	3.79e-05	0.615	CTGCGTGTC
1320	mamo-s	BGIBMGA001703	up	564	572	-	10.8899	7.48e-05	0.739	CCGCGTGCC
1321	mamo-s	BGIBMGA001705	down	480	488	-	11.3303	4.96e-05	0.615	GTGGGTGGC
1322	mamo-s	BGIBMGA001705	down	141	149	-	11.0826	6.84e-05	0.709	GTACGTGGC
1323	mamo-s	BGIBMGA001707	down	1428	1436	+	11.4404	4.51e-05	0.615	CGGCGTGGC
1324	mamo-s	BGIBMGA001707	up	120	128	+	11.3303	4.96e-05	0.615	GTGGGTGGC
1325	mamo-s	BGIBMGA001708	up	881	889	+	13.6606	4.06e-06	0.615	GCGCGTGGC
1326	mamo-s	BGIBMGA001710	up	1545	1553	+	11.1743	5.9e-05	0.684	CCGCGTGTC
1327	mamo-s	BGIBMGA001712	up	1263	1271	+	11.3303	4.96e-05	0.615	GTGGGTGGC
1328	mamo-s	BGIBMGA001712	down	1931	1939	+	11.3303	4.96e-05	0.615	GTGGGTGGC
1329	mamo-s	BGIBMGA001712	down	1417	1425	-	11.0826	6.84e-05	0.709	GTACGTGGC
1330	mamo-s	BGIBMGA001713	down	661	669	-	11.4404	4.51e-05	0.615	GAGCGTGTC
1331	mamo-s	BGIBMGA001713	up	1226	1234	+	11.4404	4.51e-05	0.615	GAGCGTGTC
1332	mamo-s	BGIBMGA001714	down	41	49	-	10.7523	8.38e-05	0.797	GGGCGTGTC
1333	mamo-s	BGIBMGA001720	up	166	174	-	11.3303	4.96e-05	0.615	GTGGGTGGC
1334	mamo-s	BGIBMGA001721	up	1488	1496	+	13.0275	8.53e-06	0.615	GAGCGTGGC
1335	mamo-s	BGIBMGA001721	up	158	166	+	11.3303	4.96e-05	0.615	GTGGGTGGC
1336	mamo-s	BGIBMGA001722	down	1986	1994	-	11.3303	4.96e-05	0.615	GTGGGTGGC
1337	mamo-s	BGIBMGA001723	down	1844	1852	-	11.3303	4.96e-05	0.615	GTGGGTGGC
1338	mamo-s	BGIBMGA001727	down	358	366	+	11.3303	4.96e-05	0.615	GTGGGTGGC
1339	mamo-s	BGIBMGA001727	down	691	699	-	11.0826	6.84e-05	0.709	GTACGTGGC
1340	mamo-s	BGIBMGA001727	up	1576	1584	+	11.0826	6.84e-05	0.709	GTACGTGGC
1341	mamo-s	BGIBMGA001727	up	1104	1112	+	10.5138	9.75e-05	0.865	GTGCGTGTT
1342	mamo-s	BGIBMGA001728	down	1821	1829	-	11.3303	4.96e-05	0.615	GTGGGTGGC
1343	mamo-s	BGIBMGA001729	down	1696	1704	+	12.1009	2.43e-05	0.615	GTGCGTGGT
1344	mamo-s	BGIBMGA001729	down	306	314	+	11.3303	4.96e-05	0.615	GTGGGTGGC
1345	mamo-s	BGIBMGA001730	up	1322	1330	-	11.2844	5.18e-05	0.63	CTGCGTGCC
1346	mamo-s	BGIBMGA001731	down	1609	1617	+	11.789	2.84e-05	0.615	GCGCGTGCC
1347	mamo-s	BGIBMGA001731	down	62	70	+	11.3303	4.96e-05	0.615	GTGGGTGGC
1348	mamo-s	BGIBMGA001731	down	513	521	+	11.3303	4.96e-05	0.615	GTGGGTGGC
1349	mamo-s	BGIBMGA001732	down	478	486	-	11.3303	4.96e-05	0.615	GTGGGTGGC
1350	mamo-s	BGIBMGA001733	down	1524	1532	-	12.0734	2.66e-05	0.615	GCGCGTGTC
1351	mamo-s	BGIBMGA001736	up	287	295	-	11.3303	4.96e-05	0.615	GTGGGTGGC
1352	mamo-s	BGIBMGA001736	down	1166	1174	+	11.3303	4.96e-05	0.615	GTGGGTGGC
1353	mamo-s	BGIBMGA001737	down	636	644	-	11.3303	4.96e-05	0.615	GTGGGTGGC
1354	mamo-s	BGIBMGA001737	down	965	973	-	11.3303	4.96e-05	0.615	GTGGGTGGC
1355	mamo-s	BGIBMGA001740	up	1280	1288	+	11.3303	4.96e-05	0.615	GTGGGTGGC
1356	mamo-s	BGIBMGA001741	down	956	964	-	11.3303	4.96e-05	0.615	GTGGGTGGC
1357	mamo-s	BGIBMGA001742	up	879	887	+	10.5138	9.75e-05	0.865	GTGCGTGTT
1358	mamo-s	BGIBMGA001743	up	1778	1786	+	11.2844	5.18e-05	0.63	CTGCGTGCC
1359	mamo-s	BGIBMGA001743	down	1826	1834	+	10.5138	9.75e-05	0.865	GTGCGTGTT
1360	mamo-s	BGIBMGA001744	down	387	395	+	11.3303	4.96e-05	0.615	GTGGGTGGC
1361	mamo-s	BGIBMGA001744	up	1185	1193	+	11.0826	6.84e-05	0.709	GTACGTGGC
1362	mamo-s	BGIBMGA001744	down	185	193	-	10.8899	7.48e-05	0.739	CCGCGTGCC
1363	mamo-s	BGIBMGA001744	up	896	904	+	10.5413	9.42e-05	0.857	CAGCGTGTC
1364	mamo-s	BGIBMGA001745	down	307	315	+	11.3303	4.96e-05	0.615	GTGGGTGGC
1365	mamo-s	BGIBMGA001745	up	1807	1815	-	11.3303	4.96e-05	0.615	GTGGGTGGC
1366	mamo-s	BGIBMGA001745	up	884	892	+	11.0734	7.12e-05	0.726	GAGCGTGGT
1367	mamo-s	BGIBMGA001748	down	757	765	+	11.3303	4.96e-05	0.615	GTGGGTGGC
1368	mamo-s	BGIBMGA001748	down	1730	1738	+	11.3303	4.96e-05	0.615	GTGGGTGGC
1369	mamo-s	BGIBMGA001750	down	933	941	+	11.2844	5.18e-05	0.63	CTGCGTGCC
1370	mamo-s	BGIBMGA001752	down	1595	1603	+	14.055	2.23e-06	0.615	GTGCGTGGC
1371	mamo-s	BGIBMGA001754	up	483	491	-	11.5688	3.79e-05	0.615	CTGCGTGTC
1372	mamo-s	BGIBMGA001755	down	1175	1183	+	11.3303	4.96e-05	0.615	GTGGGTGGC
1373	mamo-s	BGIBMGA001756	down	971	979	-	13.6606	4.06e-06	0.615	GCGCGTGGC
1374	mamo-s	BGIBMGA001757	up	1601	1609	+	11.3303	4.96e-05	0.615	GTGGGTGGC
1375	mamo-s	BGIBMGA001758	up	1525	1533	-	11.3303	4.96e-05	0.615	GTGGGTGGC
1376	mamo-s	BGIBMGA001760	down	446	454	-	11.0826	6.84e-05	0.709	GTACGTGGC
1377	mamo-s	BGIBMGA001761	down	138	146	-	11.3303	4.96e-05	0.615	GTGGGTGGC
1378	mamo-s	BGIBMGA001761	up	1123	1131	+	11.3303	4.96e-05	0.615	GTGGGTGGC
1379	mamo-s	BGIBMGA001761	down	1226	1234	-	11.3303	4.96e-05	0.615	GTGGGTGGC
1380	mamo-s	BGIBMGA001761	up	1710	1718	+	11.0826	6.84e-05	0.709	GTACGTGGC
1381	mamo-s	BGIBMGA001762	down	1129	1137	-	11.3303	4.96e-05	0.615	GTGGGTGGC
1382	mamo-s	BGIBMGA001763	up	1471	1479	+	12.0734	2.66e-05	0.615	GCGCGTGTC
1383	mamo-s	BGIBMGA001764	down	1719	1727	+	11.3303	4.96e-05	0.615	GTGGGTGGC
1384	mamo-s	BGIBMGA001765	up	1780	1788	+	11.7064	3.52e-05	0.615	GCGCGTGGT
1385	mamo-s	BGIBMGA001766	down	524	532	-	11.3303	4.96e-05	0.615	GTGGGTGGC
1386	mamo-s	BGIBMGA001766	up	957	965	-	10.8073	7.89e-05	0.766	CCGCGTGGT
1387	mamo-s	BGIBMGA001766	up	1680	1688	-	10.5138	9.75e-05	0.865	GTGCGTGTT
1388	mamo-s	BGIBMGA001767	up	1228	1236	-	11.4404	4.51e-05	0.615	CGGCGTGGC
1389	mamo-s	BGIBMGA001768	up	191	199	-	11.156	6.13e-05	0.705	GAGCGTGCC
1390	mamo-s	BGIBMGA001769	down	1471	1479	-	12.4679	1.31e-05	0.615	GTGCGTGTC
1391	mamo-s	BGIBMGA001769	up	362	370	-	11.3303	4.96e-05	0.615	GTGGGTGGC
1392	mamo-s	BGIBMGA001770	down	1733	1741	+	10.5413	9.42e-05	0.857	CAGCGTGTC
1393	mamo-s	BGIBMGA001771	down	350	358	-	11.5688	3.79e-05	0.615	CTGCGTGTC
1394	mamo-s	BGIBMGA001771	down	1654	1662	-	11.3303	4.96e-05	0.615	GTGGGTGGC
1395	mamo-s	BGIBMGA001772	up	454	462	-	11.3303	4.96e-05	0.615	GTGGGTGGC
1396	mamo-s	BGIBMGA001772	down	670	678	+	11.3303	4.96e-05	0.615	GTGGGTGGC
1397	mamo-s	BGIBMGA001773	down	1801	1809	+	11.3303	4.96e-05	0.615	GTGGGTGGC
1398	mamo-s	BGIBMGA001777	up	195	203	+	12.3394	1.49e-05	0.615	GGGCGTGGC
1399	mamo-s	BGIBMGA001777	up	864	872	-	11.3303	4.96e-05	0.615	GTGGGTGGC
1400	mamo-s	BGIBMGA001778	down	167	175	-	11.2294	5.41e-05	0.65	CTGCGAGGC
1401	mamo-s	BGIBMGA001779	down	1067	1075	-	11.3303	4.96e-05	0.615	GTGGGTGGC
1402	mamo-s	BGIBMGA001781	up	154	162	+	11.3303	4.96e-05	0.615	GTGGGTGGC
1403	mamo-s	BGIBMGA001781	down	1971	1979	+	11.3303	4.96e-05	0.615	GTGGGTGGC
1404	mamo-s	BGIBMGA001782	down	876	884	+	11.3303	4.96e-05	0.615	GTGGGTGGC
1405	mamo-s	BGIBMGA001782	down	498	506	-	11.1009	6.57e-05	0.709	GAGCGAGGC
1406	mamo-s	BGIBMGA001784	up	1725	1733	+	10.8349	7.66e-05	0.751	CCGCGAGGC
1407	mamo-s	BGIBMGA001785	up	974	982	-	12.4679	1.31e-05	0.615	GTGCGTGTC
1408	mamo-s	BGIBMGA001785	down	1020	1028	+	11.3303	4.96e-05	0.615	GTGGGTGGC
1409	mamo-s	BGIBMGA001789	down	514	522	+	12.7615	1.04e-05	0.615	CCGCGTGGC
1410	mamo-s	BGIBMGA001790	up	1599	1607	-	11.1009	6.57e-05	0.709	GAGCGAGGC
1411	mamo-s	BGIBMGA001791	up	1259	1267	+	11.3303	4.96e-05	0.615	GTGGGTGGC
1412	mamo-s	BGIBMGA001792	up	38	46	-	11.7798	3.11e-05	0.615	ATGCGTGGC
1413	mamo-s	BGIBMGA001793	up	194	202	+	10.5413	9.42e-05	0.857	CAGCGTGTC
1414	mamo-s	BGIBMGA001795	down	1317	1325	-	11.3303	4.96e-05	0.615	GTGGGTGGC
1415	mamo-s	BGIBMGA001797	down	1387	1395	-	11.3303	4.96e-05	0.615	GTGGGTGGC
1416	mamo-s	BGIBMGA001799	down	526	534	+	11.3303	4.96e-05	0.615	GTGGGTGGC
1417	mamo-s	BGIBMGA001803	up	1318	1326	-	11.3303	4.96e-05	0.615	GTGGGTGGC
1418	mamo-s	BGIBMGA001805	down	524	532	+	11.3303	4.96e-05	0.615	GTGGGTGGC
1419	mamo-s	BGIBMGA001808	down	1798	1806	-	11.3303	4.96e-05	0.615	GTGGGTGGC
1420	mamo-s	BGIBMGA001808	down	1712	1720	+	10.5413	9.42e-05	0.857	CAGCGTGTC
1421	mamo-s	BGIBMGA001809	up	1650	1658	-	11.3303	4.96e-05	0.615	GTGGGTGGC
1422	mamo-s	BGIBMGA001809	up	1564	1572	+	10.5413	9.42e-05	0.857	CAGCGTGTC
1423	mamo-s	BGIBMGA001810	down	1350	1358	+	11.7064	3.52e-05	0.615	GCGCGTGGT
1424	mamo-s	BGIBMGA001810	up	406	414	-	11.3303	4.96e-05	0.615	GTGGGTGGC
1425	mamo-s	BGIBMGA001813	up	55	63	+	11.3303	4.96e-05	0.615	GTGGGTGGC
1426	mamo-s	BGIBMGA001814	up	920	928	+	11.3303	4.96e-05	0.615	GTGGGTGGC
1427	mamo-s	BGIBMGA001814	down	378	386	+	11.0826	6.84e-05	0.709	GTACGTGGC
1428	mamo-s	BGIBMGA001815	down	1238	1246	+	11.3303	4.96e-05	0.615	GTGGGTGGC
1429	mamo-s	BGIBMGA001816	down	933	941	+	11.0734	7.12e-05	0.726	GAGCGTGGT
1430	mamo-s	BGIBMGA001816	up	1214	1222	+	11.0734	7.12e-05	0.726	GAGCGTGGT
1431	mamo-s	BGIBMGA001817	up	1130	1138	-	11.0734	7.12e-05	0.726	GAGCGTGGT
1432	mamo-s	BGIBMGA001818	up	1495	1503	-	11.3303	4.96e-05	0.615	GTGGGTGGC
1433	mamo-s	BGIBMGA001819	down	630	638	+	11.3303	4.96e-05	0.615	GTGGGTGGC
1434	mamo-s	BGIBMGA001819	down	843	851	-	11.3303	4.96e-05	0.615	GTGGGTGGC
1435	mamo-s	BGIBMGA001819	up	241	249	-	11.0826	6.84e-05	0.709	GTACGTGGC
1436	mamo-s	BGIBMGA001820	down	1522	1530	-	11.3303	4.96e-05	0.615	GTGGGTGGC
1437	mamo-s	BGIBMGA001824	up	750	758	+	11.3303	4.96e-05	0.615	GTGGGTGGC
1438	mamo-s	BGIBMGA001826	up	930	938	-	11.3303	4.96e-05	0.615	GTGGGTGGC
1439	mamo-s	BGIBMGA001827	up	142	150	-	11.3303	4.96e-05	0.615	GTGGGTGGC
1440	mamo-s	BGIBMGA001829	down	213	221	-	11.3303	4.96e-05	0.615	GTGGGTGGC
1441	mamo-s	BGIBMGA001836	up	493	501	-	11.3303	4.96e-05	0.615	GTGGGTGGC
1442	mamo-s	BGIBMGA001836	down	746	754	-	11.3303	4.96e-05	0.615	GTGGGTGGC
1443	mamo-s	BGIBMGA001837	up	878	886	-	11.3303	4.96e-05	0.615	GTGGGTGGC
1444	mamo-s	BGIBMGA001839	up	1049	1057	-	12.1009	2.43e-05	0.615	GTGCGTGGT
1445	mamo-s	BGIBMGA001841	up	372	380	+	13.6606	4.06e-06	0.615	GCGCGTGGC
1446	mamo-s	BGIBMGA001841	down	1729	1737	-	11.3303	4.96e-05	0.615	GTGGGTGGC
1447	mamo-s	BGIBMGA001842	down	1827	1835	-	11.3303	4.96e-05	0.615	GTGGGTGGC
1448	mamo-s	BGIBMGA001843	up	1756	1764	+	11.0826	6.84e-05	0.709	GTACGTGGC
1449	mamo-s	BGIBMGA001845	up	1651	1659	-	11.3303	4.96e-05	0.615	GTGGGTGGC
1450	mamo-s	BGIBMGA001846	up	1090	1098	+	11.3303	4.96e-05	0.615	GTGGGTGGC
1451	mamo-s	BGIBMGA001849	down	300	308	-	11.7064	3.52e-05	0.615	GCGCGTGGT
1452	mamo-s	BGIBMGA001849	up	468	476	+	11.2018	5.68e-05	0.674	CTGCGTGGT
1453	mamo-s	BGIBMGA001850	up	1610	1618	+	11.3303	4.96e-05	0.615	GTGGGTGGC
1454	mamo-s	BGIBMGA001851	up	698	706	-	11.3303	4.96e-05	0.615	GTGGGTGGC
1455	mamo-s	BGIBMGA001851	down	1518	1526	-	11.3303	4.96e-05	0.615	GTGGGTGGC
1456	mamo-s	BGIBMGA001858	up	1081	1089	+	12.7615	1.04e-05	0.615	CCGCGTGGC
1457	mamo-s	BGIBMGA001859	down	848	856	+	11.3303	4.96e-05	0.615	GTGGGTGGC
1458	mamo-s	BGIBMGA001863	up	1126	1134	-	11.3303	4.96e-05	0.615	GTGGGTGGC
1459	mamo-s	BGIBMGA001863	down	1708	1716	+	11.3303	4.96e-05	0.615	GTGGGTGGC
1460	mamo-s	BGIBMGA001864	down	1936	1944	-	11.3303	4.96e-05	0.615	GTGGGTGGC
1461	mamo-s	BGIBMGA001866	up	609	617	+	12.1009	2.43e-05	0.615	GTGCGTGGT
1462	mamo-s	BGIBMGA001870	down	878	886	+	11.3303	4.96e-05	0.615	GTGGGTGGC
1463	mamo-s	BGIBMGA001873	up	302	310	+	11.3303	4.96e-05	0.615	GTGGGTGGC
1464	mamo-s	BGIBMGA001874	up	1682	1690	-	11.3303	4.96e-05	0.615	GTGGGTGGC
1465	mamo-s	BGIBMGA001875	down	291	299	-	11.3303	4.96e-05	0.615	GTGGGTGGC
1466	mamo-s	BGIBMGA001876	down	334	342	-	11.7798	3.11e-05	0.615	ATGCGTGGC
1467	mamo-s	BGIBMGA001876	down	1588	1596	+	11.3303	4.96e-05	0.615	GTGGGTGGC
1468	mamo-s	BGIBMGA001878	up	971	979	-	11.0826	6.84e-05	0.709	GTACGTGGC
1469	mamo-s	BGIBMGA001880	up	796	804	-	11.3303	4.96e-05	0.615	GTGGGTGGC
1470	mamo-s	BGIBMGA001882	up	1590	1598	-	11.3303	4.96e-05	0.615	GTGGGTGGC
1471	mamo-s	BGIBMGA001883	down	260	268	+	13.0275	8.53e-06	0.615	GAGCGTGGC
1472	mamo-s	BGIBMGA001884	up	766	774	+	13.0275	8.53e-06	0.615	GAGCGTGGC
1473	mamo-s	BGIBMGA001886	down	1618	1626	+	11.2294	5.41e-05	0.65	CTGCGAGGC
1474	mamo-s	BGIBMGA001888	up	765	773	+	11.7798	3.11e-05	0.615	ATGCGTGGC
1475	mamo-s	BGIBMGA001888	up	461	469	+	11.3303	4.96e-05	0.615	GTGGGTGGC
1476	mamo-s	BGIBMGA001890	up	1572	1580	-	10.5138	9.75e-05	0.865	GTGCGTGTT
1477	mamo-s	BGIBMGA001891	down	940	948	-	11.3303	4.96e-05	0.615	GTGGGTGGC
1478	mamo-s	BGIBMGA001893	up	124	132	+	11.3303	4.96e-05	0.615	GTGGGTGGC
1479	mamo-s	BGIBMGA001896	up	1670	1678	-	11.3303	4.96e-05	0.615	GTGGGTGGC
1480	mamo-s	BGIBMGA001899	up	802	810	+	14.055	2.23e-06	0.615	GTGCGTGGC
1481	mamo-s	BGIBMGA001901	up	1496	1504	+	11.3303	4.96e-05	0.615	GTGGGTGGC
1482	mamo-s	BGIBMGA001901	up	863	871	+	10.9358	7.3e-05	0.728	GCGGGTGGC
1483	mamo-s	BGIBMGA001902	down	1140	1148	+	11.3303	4.96e-05	0.615	GTGGGTGGC
1484	mamo-s	BGIBMGA001905	down	1621	1629	-	11.3303	4.96e-05	0.615	GTGGGTGGC
1485	mamo-s	BGIBMGA001908	up	144	152	-	13.6606	4.06e-06	0.615	GCGCGTGGC
1486	mamo-s	BGIBMGA001911	up	817	825	-	10.5413	9.42e-05	0.857	GTGCGAGTC
1487	mamo-s	BGIBMGA001912	down	1692	1700	-	11.4404	4.51e-05	0.615	CGGCGTGGC
1488	mamo-s	BGIBMGA001912	down	1801	1809	+	11.0826	6.84e-05	0.709	GTACGTGGC
1489	mamo-s	BGIBMGA001913	up	743	751	+	11.3303	4.96e-05	0.615	GTGGGTGGC
1490	mamo-s	BGIBMGA001913	up	1008	1016	+	11.3303	4.96e-05	0.615	GTGGGTGGC
1491	mamo-s	BGIBMGA001915	up	353	361	-	11.4404	4.51e-05	0.615	CGGCGTGGC
1492	mamo-s	BGIBMGA001915	up	521	529	-	11.4404	4.51e-05	0.615	CGGCGTGGC
1493	mamo-s	BGIBMGA001916	down	1088	1096	+	11.3303	4.96e-05	0.615	GTGGGTGGC
1494	mamo-s	BGIBMGA001917	down	1737	1745	+	11.3303	4.96e-05	0.615	GTGGGTGGC
1495	mamo-s	BGIBMGA001923	up	1825	1833	+	11.3303	4.96e-05	0.615	GTGGGTGGC
1496	mamo-s	BGIBMGA001926	up	1312	1320	+	12.7615	1.04e-05	0.615	CCGCGTGGC
1497	mamo-s	BGIBMGA001930	down	274	282	-	11.4404	4.51e-05	0.615	CGGCGTGGC
1498	mamo-s	BGIBMGA001930	down	795	803	+	11.3303	4.96e-05	0.615	GTGGGTGGC
1499	mamo-s	BGIBMGA001930	down	1146	1154	-	10.6881	8.61e-05	0.81	GCACGTGGC
1500	mamo-s	BGIBMGA001933	up	1129	1137	-	10.5138	9.75e-05	0.865	GTGCGTGTT
1501	mamo-s	BGIBMGA001934	up	1219	1227	-	13.6606	4.06e-06	0.615	GCGCGTGGC
1502	mamo-s	BGIBMGA001935	up	1793	1801	-	11.7798	3.11e-05	0.615	ATGCGTGGC
1503	mamo-s	BGIBMGA001936	down	1874	1882	+	11.1743	5.9e-05	0.684	CCGCGTGTC
1504	mamo-s	BGIBMGA001938	down	1991	1999	-	11.2294	5.41e-05	0.65	CTGCGAGGC
1505	mamo-s	BGIBMGA001938	down	424	432	-	10.5138	9.75e-05	0.865	GTGCGTGTT
1506	mamo-s	BGIBMGA001941	down	1936	1944	+	12.0734	2.66e-05	0.615	GCGCGTGTC
1507	mamo-s	BGIBMGA001941	down	849	857	-	11.3303	4.96e-05	0.615	GTGGGTGGC
1508	mamo-s	BGIBMGA001942	up	1701	1709	-	11.1009	6.57e-05	0.709	GAGCGAGGC
1509	mamo-s	BGIBMGA001943	down	1608	1616	+	12.1284	2.16e-05	0.615	CAGCGTGGC
1510	mamo-s	BGIBMGA001943	up	1565	1573	+	11.3303	4.96e-05	0.615	GTGGGTGGC
1511	mamo-s	BGIBMGA001944	down	537	545	+	11.3303	4.96e-05	0.615	GTGGGTGGC
1512	mamo-s	BGIBMGA001944	down	698	706	+	11.3303	4.96e-05	0.615	GTGGGTGGC
1513	mamo-s	BGIBMGA001944	down	1054	1062	-	11.0826	6.84e-05	0.709	GTACGTGGC
1514	mamo-s	BGIBMGA001945	up	263	271	-	11.3303	4.96e-05	0.615	GTGGGTGGC
1515	mamo-s	BGIBMGA001946	up	1300	1308	+	11.3853	4.74e-05	0.615	ACGCGTGGC
1516	mamo-s	BGIBMGA001948	down	1972	1980	-	11.156	6.13e-05	0.705	GAGCGTGCC
1517	mamo-s	BGIBMGA001950	down	803	811	+	12.7615	1.04e-05	0.615	CCGCGTGGC
1518	mamo-s	BGIBMGA001952	down	243	251	+	11.3303	4.96e-05	0.615	GTGGGTGGC
1519	mamo-s	BGIBMGA001953	down	1454	1462	+	11.7339	3.29e-05	0.615	GCGCGAGGC
1520	mamo-s	BGIBMGA001953	up	56	64	+	11.3303	4.96e-05	0.615	GTGGGTGGC
1521	mamo-s	BGIBMGA001953	down	326	334	+	11.156	6.13e-05	0.705	GAGCGTGCC
1522	mamo-s	BGIBMGA001957	down	53	61	+	11.3303	4.96e-05	0.615	GTGGGTGGC
1523	mamo-s	BGIBMGA001958	down	1323	1331	+	11.3303	4.96e-05	0.615	GTGGGTGGC
1524	mamo-s	BGIBMGA001959	up	901	909	+	11.3303	4.96e-05	0.615	GTGGGTGGC
1525	mamo-s	BGIBMGA001960	down	473	481	-	11.3303	4.96e-05	0.615	GTGGGTGGC
1526	mamo-s	BGIBMGA001960	down	1576	1584	-	11.3303	4.96e-05	0.615	GTGGGTGGC
1527	mamo-s	BGIBMGA001960	down	1950	1958	+	11.3303	4.96e-05	0.615	GTGGGTGGC
1528	mamo-s	BGIBMGA001961	up	1939	1947	+	12.4679	1.31e-05	0.615	GTGCGTGTC
1529	mamo-s	BGIBMGA001961	down	274	282	+	11.3303	4.96e-05	0.615	GTGGGTGGC
1530	mamo-s	BGIBMGA001961	down	1709	1717	+	11.3303	4.96e-05	0.615	GTGGGTGGC
1531	mamo-s	BGIBMGA001961	up	283	291	+	11.0826	6.84e-05	0.709	GTACGTGGC
1532	mamo-s	BGIBMGA001964	up	212	220	+	10.5138	9.75e-05	0.865	GTGCGTGTT
1533	mamo-s	BGIBMGA001968	up	1297	1305	+	11.3303	4.96e-05	0.615	GTGGGTGGC
1534	mamo-s	BGIBMGA001970	down	698	706	-	13.6606	4.06e-06	0.615	GCGCGTGGC
1535	mamo-s	BGIBMGA001970	up	304	312	-	11.3303	4.96e-05	0.615	GTGGGTGGC
1536	mamo-s	BGIBMGA001972	up	101	109	+	11.3303	4.96e-05	0.615	GTGGGTGGC
1537	mamo-s	BGIBMGA001972	down	1788	1796	-	10.8073	7.89e-05	0.766	CCGCGTGGT
1538	mamo-s	BGIBMGA001973	up	419	427	+	11.3303	4.96e-05	0.615	GTGGGTGGC
1539	mamo-s	BGIBMGA001974	down	1297	1305	-	14.055	2.23e-06	0.615	GTGCGTGGC
1540	mamo-s	BGIBMGA001974	up	572	580	+	10.9358	7.3e-05	0.728	GCGGGTGGC
1541	mamo-s	BGIBMGA001975	up	1505	1513	-	11.2018	5.68e-05	0.674	CTGCGTGGT
1542	mamo-s	BGIBMGA001977	down	1545	1553	+	11.3303	4.96e-05	0.615	GTGGGTGGC
1543	mamo-s	BGIBMGA001978	up	1498	1506	-	11.3303	4.96e-05	0.615	GTGGGTGGC
1544	mamo-s	BGIBMGA001980	up	1139	1147	+	11.2018	5.68e-05	0.674	CTGCGTGGT
1545	mamo-s	BGIBMGA001982	down	1131	1139	-	11.7798	3.11e-05	0.615	ATGCGTGGC
1546	mamo-s	BGIBMGA001983	up	998	1006	+	10.5138	9.75e-05	0.865	GTGCGTGTT
1547	mamo-s	BGIBMGA001984	down	1455	1463	-	12.1284	2.16e-05	0.615	GTGCGAGGC
1548	mamo-s	BGIBMGA001984	down	739	747	-	11.3303	4.96e-05	0.615	GTGGGTGGC
1549	mamo-s	BGIBMGA001985	down	198	206	+	12.4679	1.31e-05	0.615	GTGCGTGTC
1550	mamo-s	BGIBMGA001986	up	660	668	+	11.3303	4.96e-05	0.615	GTGGGTGGC
1551	mamo-s	BGIBMGA001987	up	1327	1335	+	12.0734	2.66e-05	0.615	GCGCGTGTC
1552	mamo-s	BGIBMGA001988	down	207	215	+	11.3303	4.96e-05	0.615	GTGGGTGGC
1553	mamo-s	BGIBMGA001988	up	805	813	+	11.3303	4.96e-05	0.615	GTGGGTGGC
1554	mamo-s	BGIBMGA001988	up	1828	1836	+	11.2844	5.18e-05	0.63	CTGCGTGCC
1555	mamo-s	BGIBMGA001988	up	359	367	-	11.0826	6.84e-05	0.709	GTACGTGGC
1556	mamo-s	BGIBMGA001990	up	435	443	-	11.3303	4.96e-05	0.615	GTGGGTGGC
1557	mamo-s	BGIBMGA001990	down	841	849	-	11.3303	4.96e-05	0.615	GTGGGTGGC
1558	mamo-s	BGIBMGA001990	up	954	962	-	10.8073	7.89e-05	0.766	CCGCGTGGT
1559	mamo-s	BGIBMGA001991	up	492	500	+	11.3303	4.96e-05	0.615	GTGGGTGGC
1560	mamo-s	BGIBMGA001992	up	1397	1405	-	11.3303	4.96e-05	0.615	GTGGGTGGC
1561	mamo-s	BGIBMGA001994	down	452	460	+	12.1009	2.43e-05	0.615	GTGCGTGGT
1562	mamo-s	BGIBMGA001994	down	445	453	+	11.2018	5.68e-05	0.674	CTGCGTGGT
1563	mamo-s	BGIBMGA001994	up	481	489	+	10.5138	9.75e-05	0.865	GTGCGTGTT
1564	mamo-s	BGIBMGA001996	up	230	238	-	11.3303	4.96e-05	0.615	GTGGGTGGC
1565	mamo-s	BGIBMGA001996	up	1802	1810	+	11.3303	4.96e-05	0.615	GTGGGTGGC
1566	mamo-s	BGIBMGA001996	down	1128	1136	+	10.9358	7.3e-05	0.728	GCGGGTGGC
1567	mamo-s	BGIBMGA002002	down	41	49	-	11.1743	5.9e-05	0.684	CCGCGTGTC
1568	mamo-s	BGIBMGA002003	up	985	993	+	11.1743	5.9e-05	0.684	CCGCGTGTC
1569	mamo-s	BGIBMGA002004	up	681	689	-	12.4679	1.31e-05	0.615	GTGCGTGTC
1570	mamo-s	BGIBMGA002004	up	646	654	+	11.4404	4.51e-05	0.615	CGGCGTGGC
1571	mamo-s	BGIBMGA002004	down	1952	1960	-	10.7523	8.38e-05	0.797	GGGCGTGTC
1572	mamo-s	BGIBMGA002005	up	535	543	-	10.7523	8.38e-05	0.797	GGGCGTGTC
1573	mamo-s	BGIBMGA002007	up	738	746	+	11.3303	4.96e-05	0.615	GTGGGTGGC
1574	mamo-s	BGIBMGA002009	up	1760	1768	-	13.156	6.3e-06	0.615	CTGCGTGGC
1575	mamo-s	BGIBMGA002011	up	570	578	-	11.0826	6.84e-05	0.709	GTACGTGGC
1576	mamo-s	BGIBMGA002012	down	1503	1511	-	11.1376	6.35e-05	0.709	TCGCGTGGC
1577	mamo-s	BGIBMGA002016	up	1195	1203	+	12.1835	1.71e-05	0.615	GTGCGTGCC
1578	mamo-s	BGIBMGA002016	up	812	820	+	11.3303	4.96e-05	0.615	GTGGGTGGC
1579	mamo-s	BGIBMGA002017	down	706	714	-	13.0275	8.53e-06	0.615	GAGCGTGGC
1580	mamo-s	BGIBMGA002017	down	673	681	+	12.1835	1.71e-05	0.615	GTGCGTGCC
1581	mamo-s	BGIBMGA002022	up	1837	1845	-	13.156	6.3e-06	0.615	CTGCGTGGC
1582	mamo-s	BGIBMGA002022	down	13	21	-	10.7523	8.38e-05	0.797	AAGCGTGGC
1583	mamo-s	BGIBMGA002022	up	728	736	-	10.7523	8.38e-05	0.797	AAGCGTGGC
1584	mamo-s	BGIBMGA002025	up	1723	1731	+	11.3303	4.96e-05	0.615	GTGGGTGGC
1585	mamo-s	BGIBMGA002026	up	281	289	+	11.5321	4.06e-05	0.615	TTGCGTGGC
1586	mamo-s	BGIBMGA002029	up	719	727	-	11.3303	4.96e-05	0.615	GTGGGTGGC
1587	mamo-s	BGIBMGA002030	up	316	324	+	11.7798	3.11e-05	0.615	ATGCGTGGC
1588	mamo-s	BGIBMGA002030	down	803	811	-	11.3303	4.96e-05	0.615	GTGGGTGGC
1589	mamo-s	BGIBMGA002030	down	1605	1613	-	11.3303	4.96e-05	0.615	GTGGGTGGC
1590	mamo-s	BGIBMGA002031	up	1063	1071	+	14.055	2.23e-06	0.615	GTGCGTGGC
1591	mamo-s	BGIBMGA002031	down	624	632	+	10.8073	7.89e-05	0.766	CCGCGTGGT
1592	mamo-s	BGIBMGA002034	up	512	520	-	12.1009	2.43e-05	0.615	GTGCGTGGT
1593	mamo-s	BGIBMGA002037	up	1629	1637	-	11.3303	4.96e-05	0.615	GTGGGTGGC
1594	mamo-s	BGIBMGA002038	down	509	517	-	12.1835	1.71e-05	0.615	GTGCGTGCC
1595	mamo-s	BGIBMGA002038	up	114	122	+	11.3303	4.96e-05	0.615	GTGGGTGGC
1596	mamo-s	BGIBMGA002038	down	1312	1320	+	11.3303	4.96e-05	0.615	GTGGGTGGC
1597	mamo-s	BGIBMGA002038	down	1633	1641	+	11.3303	4.96e-05	0.615	GTGGGTGGC
1598	mamo-s	BGIBMGA002039	up	477	485	+	11.7064	3.52e-05	0.615	GCGCGTGGT
1599	mamo-s	BGIBMGA002039	down	1368	1376	-	10.5138	9.75e-05	0.865	GTGCGTGTT
1600	mamo-s	BGIBMGA002044	down	1803	1811	+	11.2294	5.41e-05	0.65	CTGCGAGGC
1601	mamo-s	BGIBMGA002044	up	106	114	-	11.0826	6.84e-05	0.709	GTACGTGGC
1602	mamo-s	BGIBMGA002047	down	8	16	+	11.7339	3.29e-05	0.615	GCGCGAGGC
1603	mamo-s	BGIBMGA002047	up	378	386	+	11.1743	5.9e-05	0.684	CCGCGTGTC
1604	mamo-s	BGIBMGA002049	down	1277	1285	+	11.3303	4.96e-05	0.615	GTGGGTGGC
1605	mamo-s	BGIBMGA002049	down	1340	1348	-	10.9358	7.3e-05	0.728	GCGGGTGGC
1606	mamo-s	BGIBMGA002050	up	879	887	-	10.7523	8.38e-05	0.797	AAGCGTGGC
1607	mamo-s	BGIBMGA002051	down	185	193	+	12.1284	2.16e-05	0.615	GTGCGAGGC
1608	mamo-s	BGIBMGA002053	up	158	166	-	10.9358	7.3e-05	0.728	GCGGGTGGC
1609	mamo-s	BGIBMGA002055	down	1441	1449	-	11.3303	4.96e-05	0.615	GTGGGTGGC
1610	mamo-s	BGIBMGA002056	down	1069	1077	+	10.8349	7.66e-05	0.751	CCGCGAGGC
1611	mamo-s	BGIBMGA002056	up	1067	1075	-	10.6881	8.61e-05	0.81	GCACGTGGC
1612	mamo-s	BGIBMGA002057	down	1369	1377	-	13.0275	8.53e-06	0.615	GAGCGTGGC
1613	mamo-s	BGIBMGA002060	down	205	213	+	12.1284	2.16e-05	0.615	CAGCGTGGC
1614	mamo-s	BGIBMGA002061	up	1709	1717	+	12.1284	2.16e-05	0.615	CAGCGTGGC
1615	mamo-s	BGIBMGA002063	up	1015	1023	+	12.3394	1.49e-05	0.615	GGGCGTGGC
1616	mamo-s	BGIBMGA002064	up	1853	1861	-	11.4404	4.51e-05	0.615	GAGCGTGTC
1617	mamo-s	BGIBMGA002065	up	4	12	+	10.5138	9.75e-05	0.865	GTGCGTGTT
1618	mamo-s	BGIBMGA002068	up	822	830	-	11.3303	4.96e-05	0.615	GTGGGTGGC
1619	mamo-s	BGIBMGA002069	down	542	550	-	12.1835	1.71e-05	0.615	GTGCGTGCC
1620	mamo-s	BGIBMGA002070	up	486	494	-	12.1835	1.71e-05	0.615	GTGCGTGCC
1621	mamo-s	BGIBMGA002071	down	1038	1046	+	11.0826	6.84e-05	0.709	GTACGTGGC
1622	mamo-s	BGIBMGA002071	down	1802	1810	-	10.5138	9.75e-05	0.865	GTGCGTGTT
1623	mamo-s	BGIBMGA002072	up	1787	1795	-	11.3303	4.96e-05	0.615	GTGGGTGGC
1624	mamo-s	BGIBMGA002075	down	776	784	-	12.1835	1.71e-05	0.615	GTGCGTGCC
1625	mamo-s	BGIBMGA002075	up	930	938	+	11.7064	3.52e-05	0.615	GCGCGTGGT
1626	mamo-s	BGIBMGA002075	down	475	483	+	11.0826	6.84e-05	0.709	GTACGTGGC
1627	mamo-s	BGIBMGA002075	up	452	460	+	10.5688	8.88e-05	0.824	GTGCGTGAC
1628	mamo-s	BGIBMGA002077	down	1580	1588	-	12.7615	1.04e-05	0.615	CCGCGTGGC
1629	mamo-s	BGIBMGA002077	down	225	233	+	11.3303	4.96e-05	0.615	GTGGGTGGC
1630	mamo-s	BGIBMGA002077	up	1479	1487	+	11.3303	4.96e-05	0.615	GTGGGTGGC
1631	mamo-s	BGIBMGA002079	up	979	987	+	13.6606	4.06e-06	0.615	GCGCGTGGC
1632	mamo-s	BGIBMGA002080	down	1354	1362	+	11.3303	4.96e-05	0.615	GTGGGTGGC
1633	mamo-s	BGIBMGA002082	down	1531	1539	+	12.0734	2.66e-05	0.615	GCGCGTGTC
1634	mamo-s	BGIBMGA002082	down	840	848	-	11.3303	4.96e-05	0.615	GTGGGTGGC
1635	mamo-s	BGIBMGA002083	up	148	156	+	11.3303	4.96e-05	0.615	GTGGGTGGC
1636	mamo-s	BGIBMGA002083	up	1644	1652	-	11.3303	4.96e-05	0.615	GTGGGTGGC
1637	mamo-s	BGIBMGA002084	up	622	630	+	12.1284	2.16e-05	0.615	GTGCGAGGC
1638	mamo-s	BGIBMGA002085	down	1441	1449	-	11.7064	3.52e-05	0.615	GCGCGTGGT
1639	mamo-s	BGIBMGA002085	down	216	224	-	11.3303	4.96e-05	0.615	GTGGGTGGC
1640	mamo-s	BGIBMGA002085	up	642	650	+	11.3303	4.96e-05	0.615	GTGGGTGGC
1641	mamo-s	BGIBMGA002085	up	1038	1046	+	11.3303	4.96e-05	0.615	GTGGGTGGC
1642	mamo-s	BGIBMGA002086	down	430	438	-	11.3303	4.96e-05	0.615	GTGGGTGGC
1643	mamo-s	BGIBMGA002086	up	663	671	-	10.8073	7.89e-05	0.766	CCGCGTGGT
1644	mamo-s	BGIBMGA002090	up	1925	1933	-	12.1284	2.16e-05	0.615	CAGCGTGGC
1645	mamo-s	BGIBMGA002090	up	1787	1795	+	11.3303	4.96e-05	0.615	GTGGGTGGC
1646	mamo-s	BGIBMGA002092	down	1992	2000	-	11.0734	7.12e-05	0.726	GAGCGTGGT
1647	mamo-s	BGIBMGA002092	up	304	312	-	10.8899	7.48e-05	0.739	CCGCGTGCC
1648	mamo-s	BGIBMGA002093	up	212	220	-	10.5138	9.75e-05	0.865	GTGCGTGTT
1649	mamo-s	BGIBMGA002096	up	767	775	-	11.3303	4.96e-05	0.615	GTGGGTGGC
1650	mamo-s	BGIBMGA002097	down	1603	1611	-	11.3303	4.96e-05	0.615	GTGGGTGGC
1651	mamo-s	BGIBMGA002100	up	1914	1922	+	11.4404	4.51e-05	0.615	CGGCGTGGC
1652	mamo-s	BGIBMGA002101	up	462	470	-	11.3303	4.96e-05	0.615	GTGGGTGGC
1653	mamo-s	BGIBMGA002101	down	475	483	+	11.3303	4.96e-05	0.615	GTGGGTGGC
1654	mamo-s	BGIBMGA002102	down	196	204	-	11.3303	4.96e-05	0.615	GTGGGTGGC
1655	mamo-s	BGIBMGA002102	up	783	791	+	11.3303	4.96e-05	0.615	GTGGGTGGC
1656	mamo-s	BGIBMGA002103	up	127	135	+	11.3303	4.96e-05	0.615	GTGGGTGGC
1657	mamo-s	BGIBMGA002106	up	1117	1125	-	11.3303	4.96e-05	0.615	GTGGGTGGC
1658	mamo-s	BGIBMGA002110	down	295	303	-	11.3303	4.96e-05	0.615	GTGGGTGGC
1659	mamo-s	BGIBMGA002110	up	1856	1864	-	11.3303	4.96e-05	0.615	GTGGGTGGC
1660	mamo-s	BGIBMGA002111	down	1697	1705	-	11.3303	4.96e-05	0.615	GTGGGTGGC
1661	mamo-s	BGIBMGA002111	down	1966	1974	-	11.3303	4.96e-05	0.615	GTGGGTGGC
1662	mamo-s	BGIBMGA002115	down	774	782	-	10.5138	9.75e-05	0.865	GTGCGTGTT
1663	mamo-s	BGIBMGA002119	up	1897	1905	-	11.3303	4.96e-05	0.615	GTGGGTGGC
1664	mamo-s	BGIBMGA002119	down	346	354	+	10.5413	9.42e-05	0.857	CAGCGTGTC
1665	mamo-s	BGIBMGA002124	down	353	361	+	11.3303	4.96e-05	0.615	GTGGGTGGC
1666	mamo-s	BGIBMGA002124	down	1214	1222	+	11.3303	4.96e-05	0.615	GTGGGTGGC
1667	mamo-s	BGIBMGA002124	up	1231	1239	+	11.3303	4.96e-05	0.615	GTGGGTGGC
1668	mamo-s	BGIBMGA002126	up	1004	1012	-	11.3303	4.96e-05	0.615	GTGGGTGGC
1669	mamo-s	BGIBMGA002126	down	1898	1906	-	11.3303	4.96e-05	0.615	GTGGGTGGC
1670	mamo-s	BGIBMGA002127	up	966	974	+	11.0826	6.84e-05	0.709	GTACGTGGC
1671	mamo-s	BGIBMGA002132	up	1370	1378	+	11.3303	4.96e-05	0.615	GTGGGTGGC
1672	mamo-s	BGIBMGA002132	down	1875	1883	+	10.7523	8.38e-05	0.797	GGGCGTGTC
1673	mamo-s	BGIBMGA002133	down	298	306	+	11.3303	4.96e-05	0.615	GTGGGTGGC
1674	mamo-s	BGIBMGA002137	up	47	55	+	11.3303	4.96e-05	0.615	GTGGGTGGC
1675	mamo-s	BGIBMGA002138	up	93	101	-	11.3303	4.96e-05	0.615	GTGGGTGGC
1676	mamo-s	BGIBMGA002139	down	1015	1023	+	11.3303	4.96e-05	0.615	GTGGGTGGC
1677	mamo-s	BGIBMGA002139	down	832	840	+	10.7523	8.38e-05	0.797	GGGCGTGTC
1678	mamo-s	BGIBMGA002141	up	25	33	+	12.1009	2.43e-05	0.615	GTGCGTGGT
1679	mamo-s	BGIBMGA002141	up	299	307	-	11.3303	4.96e-05	0.615	GTGGGTGGC
1680	mamo-s	BGIBMGA002142	down	1489	1497	-	10.5688	8.88e-05	0.824	GTGCGTGAC
1681	mamo-s	BGIBMGA002144	down	1155	1163	-	13.0275	8.53e-06	0.615	GAGCGTGGC
1682	mamo-s	BGIBMGA002147	up	1001	1009	+	11.3303	4.96e-05	0.615	GTGGGTGGC
1683	mamo-s	BGIBMGA002149	down	380	388	+	11.3303	4.96e-05	0.615	GTGGGTGGC
1684	mamo-s	BGIBMGA002150	up	746	754	+	11.4404	4.51e-05	0.615	GAGCGTGTC
1685	mamo-s	BGIBMGA002150	down	555	563	+	11.3303	4.96e-05	0.615	GTGGGTGGC
1686	mamo-s	BGIBMGA002151	down	1144	1152	+	11.0826	6.84e-05	0.709	GTACGTGGC
1687	mamo-s	BGIBMGA002153	down	239	247	-	11.3303	4.96e-05	0.615	GTGGGTGGC
1688	mamo-s	BGIBMGA002153	down	860	868	+	11.3303	4.96e-05	0.615	GTGGGTGGC
1689	mamo-s	BGIBMGA002154	up	1614	1622	+	11.4404	4.51e-05	0.615	CGGCGTGGC
1690	mamo-s	BGIBMGA002156	up	1493	1501	-	11.3303	4.96e-05	0.615	GTGGGTGGC
1691	mamo-s	BGIBMGA002156	down	725	733	-	11.0734	7.12e-05	0.726	GAGCGTGGT
1692	mamo-s	BGIBMGA002157	up	1761	1769	-	11.789	2.84e-05	0.615	GCGCGTGCC
1693	mamo-s	BGIBMGA002157	down	456	464	+	11.4404	4.51e-05	0.615	CGGCGTGGC
1694	mamo-s	BGIBMGA002158	up	392	400	+	11.4404	4.51e-05	0.615	CGGCGTGGC
1695	mamo-s	BGIBMGA002158	up	1464	1472	-	11.0734	7.12e-05	0.726	GAGCGTGGT
1696	mamo-s	BGIBMGA002161	up	596	604	+	11.1743	5.9e-05	0.684	CCGCGTGTC
1697	mamo-s	BGIBMGA002163	down	1457	1465	+	12.1009	2.43e-05	0.615	GTGCGTGGT
1698	mamo-s	BGIBMGA002163	down	625	633	+	11.4404	4.51e-05	0.615	CGGCGTGGC
1699	mamo-s	BGIBMGA002163	up	355	363	-	11.3303	4.96e-05	0.615	GTGGGTGGC
1700	mamo-s	BGIBMGA002163	up	1016	1024	+	11.3303	4.96e-05	0.615	GTGGGTGGC
1701	mamo-s	BGIBMGA002165	up	1	9	-	11.3303	4.96e-05	0.615	GTGGGTGGC
1702	mamo-s	BGIBMGA002166	up	1145	1153	+	11.3303	4.96e-05	0.615	GTGGGTGGC
1703	mamo-s	BGIBMGA002167	up	592	600	+	11.3303	4.96e-05	0.615	GTGGGTGGC
1704	mamo-s	BGIBMGA002168	down	42	50	+	12.1835	1.71e-05	0.615	GTGCGTGCC
1705	mamo-s	BGIBMGA002168	up	1234	1242	+	11.789	2.84e-05	0.615	GCGCGTGCC
1706	mamo-s	BGIBMGA002169	down	686	694	+	11.3303	4.96e-05	0.615	GTGGGTGGC
1707	mamo-s	BGIBMGA002169	down	1421	1429	+	11.3303	4.96e-05	0.615	GTGGGTGGC
1708	mamo-s	BGIBMGA002170	up	291	299	-	10.7523	8.38e-05	0.797	GGGCGTGTC
1709	mamo-s	BGIBMGA002171	down	877	885	-	11.3303	4.96e-05	0.615	GTGGGTGGC
1710	mamo-s	BGIBMGA002173	up	1528	1536	+	10.9358	7.3e-05	0.728	GCGGGTGGC
1711	mamo-s	BGIBMGA002174	up	71	79	+	11.3303	4.96e-05	0.615	GTGGGTGGC
1712	mamo-s	BGIBMGA002174	down	1368	1376	-	11.3303	4.96e-05	0.615	GTGGGTGGC
1713	mamo-s	BGIBMGA002175	up	1793	1801	-	11.4404	4.51e-05	0.615	CGGCGTGGC
1714	mamo-s	BGIBMGA002175	up	1468	1476	-	11.3303	4.96e-05	0.615	GTGGGTGGC
1715	mamo-s	BGIBMGA002177	down	1714	1722	+	11.3303	4.96e-05	0.615	GTGGGTGGC
1716	mamo-s	BGIBMGA002179	down	5	13	+	13.0275	8.53e-06	0.615	GAGCGTGGC
1717	mamo-s	BGIBMGA002180	down	1311	1319	+	11.4404	4.51e-05	0.615	GAGCGTGTC
1718	mamo-s	BGIBMGA002180	down	348	356	+	11.3303	4.96e-05	0.615	GTGGGTGGC
1719	mamo-s	BGIBMGA002181	down	380	388	-	11.3303	4.96e-05	0.615	GTGGGTGGC
1720	mamo-s	BGIBMGA002181	up	1414	1422	-	11.3303	4.96e-05	0.615	GTGGGTGGC
1721	mamo-s	BGIBMGA002182	down	382	390	-	11.3303	4.96e-05	0.615	GTGGGTGGC
1722	mamo-s	BGIBMGA002182	up	297	305	+	11.0826	6.84e-05	0.709	GTACGTGGC
1723	mamo-s	BGIBMGA002183	up	1416	1424	-	12.1009	2.43e-05	0.615	GTGCGTGGT
1724	mamo-s	BGIBMGA002183	down	397	405	-	10.5138	9.75e-05	0.865	GTGCGTGTT
1725	mamo-s	BGIBMGA002184	up	962	970	+	11.3303	4.96e-05	0.615	GTGGGTGGC
1726	mamo-s	BGIBMGA002184	down	1433	1441	+	11.3303	4.96e-05	0.615	GTGGGTGGC
1727	mamo-s	BGIBMGA002185	down	1897	1905	+	12.7615	1.04e-05	0.615	CCGCGTGGC
1728	mamo-s	BGIBMGA002185	up	1088	1096	+	11.3303	4.96e-05	0.615	GTGGGTGGC
1729	mamo-s	BGIBMGA002186	down	379	387	-	11.2018	5.68e-05	0.674	CTGCGTGGT
1730	mamo-s	BGIBMGA002187	up	108	116	-	11.0826	6.84e-05	0.709	GTACGTGGC
1731	mamo-s	BGIBMGA002188	down	44	52	-	12.1009	2.43e-05	0.615	GTGCGTGGT
1732	mamo-s	BGIBMGA002188	down	876	884	-	11.4404	4.51e-05	0.615	CGGCGTGGC
1733	mamo-s	BGIBMGA002189	up	599	607	-	11.3303	4.96e-05	0.615	GTGGGTGGC
1734	mamo-s	BGIBMGA002191	down	1388	1396	-	13.6606	4.06e-06	0.615	GCGCGTGGC
1735	mamo-s	BGIBMGA002193	down	1976	1984	+	13.0275	8.53e-06	0.615	GAGCGTGGC
1736	mamo-s	BGIBMGA002193	up	1497	1505	+	11.0826	6.84e-05	0.709	GTACGTGGC
1737	mamo-s	BGIBMGA002193	down	869	877	+	11.0734	7.12e-05	0.726	GAGCGTGGT
1738	mamo-s	BGIBMGA002194	down	867	875	-	11.1009	6.57e-05	0.709	GAGCGAGGC
1739	mamo-s	BGIBMGA002196	up	1172	1180	+	11.4404	4.51e-05	0.615	CGGCGTGGC
1740	mamo-s	BGIBMGA002197	down	1475	1483	-	11.789	2.84e-05	0.615	GCGCGTGCC
1741	mamo-s	BGIBMGA002197	up	1158	1166	-	11.3303	4.96e-05	0.615	GTGGGTGGC
1742	mamo-s	BGIBMGA002197	down	781	789	+	11.2844	5.18e-05	0.63	CTGCGTGCC
1743	mamo-s	BGIBMGA002197	up	1966	1974	+	11.156	6.13e-05	0.705	GAGCGTGCC
1744	mamo-s	BGIBMGA002198	down	1760	1768	-	11.3303	4.96e-05	0.615	GTGGGTGGC
1745	mamo-s	BGIBMGA002199	down	190	198	+	11.3303	4.96e-05	0.615	GTGGGTGGC
1746	mamo-s	BGIBMGA002199	up	313	321	-	11.3303	4.96e-05	0.615	GTGGGTGGC
1747	mamo-s	BGIBMGA002201	down	513	521	-	13.0275	8.53e-06	0.615	GAGCGTGGC
1748	mamo-s	BGIBMGA002204	up	1213	1221	-	12.0734	2.66e-05	0.615	GCGCGTGTC
1749	mamo-s	BGIBMGA002205	up	1142	1150	+	11.3303	4.96e-05	0.615	GTGGGTGGC
1750	mamo-s	BGIBMGA002205	down	1127	1135	-	11.0826	6.84e-05	0.709	GTACGTGGC
1751	mamo-s	BGIBMGA002206	down	1829	1837	-	11.0826	6.84e-05	0.709	GTACGTGGC
1752	mamo-s	BGIBMGA002209	down	479	487	-	11.3303	4.96e-05	0.615	GTGGGTGGC
1753	mamo-s	BGIBMGA002210	down	1600	1608	-	11.3303	4.96e-05	0.615	GTGGGTGGC
1754	mamo-s	BGIBMGA002211	down	1613	1621	-	11.3303	4.96e-05	0.615	GTGGGTGGC
1755	mamo-s	BGIBMGA002212	down	1822	1830	+	11.3303	4.96e-05	0.615	GTGGGTGGC
1756	mamo-s	BGIBMGA002213	down	1930	1938	-	12.4679	1.31e-05	0.615	GTGCGTGTC
1757	mamo-s	BGIBMGA002213	down	798	806	+	12.3394	1.49e-05	0.615	GGGCGTGGC
1758	mamo-s	BGIBMGA002213	up	108	116	+	11.3303	4.96e-05	0.615	GTGGGTGGC
1759	mamo-s	BGIBMGA002213	down	23	31	-	10.6881	8.61e-05	0.81	GCACGTGGC
1760	mamo-s	BGIBMGA002214	up	1498	1506	+	11.3303	4.96e-05	0.615	GTGGGTGGC
1761	mamo-s	BGIBMGA002216	up	1286	1294	+	11.789	2.84e-05	0.615	GCGCGTGCC
1762	mamo-s	BGIBMGA002220	down	1211	1219	-	11.7339	3.29e-05	0.615	GCGCGAGGC
1763	mamo-s	BGIBMGA002220	down	835	843	+	11.0734	7.12e-05	0.726	GAGCGTGGT
1764	mamo-s	BGIBMGA002221	up	724	732	-	11.789	2.84e-05	0.615	GCGCGTGCC
1765	mamo-s	BGIBMGA002221	up	1647	1655	+	11.0734	7.12e-05	0.726	GAGCGTGGT
1766	mamo-s	BGIBMGA002222	up	1784	1792	-	11.3303	4.96e-05	0.615	GTGGGTGGC
1767	mamo-s	BGIBMGA002222	down	1871	1879	+	11.0826	6.84e-05	0.709	GTACGTGGC
1768	mamo-s	BGIBMGA002226	down	907	915	+	13.0275	8.53e-06	0.615	GAGCGTGGC
1769	mamo-s	BGIBMGA002228	down	1801	1809	-	11.3303	4.96e-05	0.615	GTGGGTGGC
1770	mamo-s	BGIBMGA002229	down	219	227	+	11.0826	6.84e-05	0.709	GTACGTGGC
1771	mamo-s	BGIBMGA002231	up	1664	1672	-	10.5413	9.42e-05	0.857	CAGCGTGTC
1772	mamo-s	BGIBMGA002232	down	1239	1247	-	11.3303	4.96e-05	0.615	GTGGGTGGC
1773	mamo-s	BGIBMGA002232	down	130	138	+	10.8349	7.66e-05	0.751	CCGCGAGGC
1774	mamo-s	BGIBMGA002233	down	1855	1863	+	12.1009	2.43e-05	0.615	GTGCGTGGT
1775	mamo-s	BGIBMGA002233	down	752	760	-	11.3303	4.96e-05	0.615	GTGGGTGGC
1776	mamo-s	BGIBMGA002234	up	197	205	+	11.3303	4.96e-05	0.615	GTGGGTGGC
1777	mamo-s	BGIBMGA002238	up	512	520	-	10.8899	7.48e-05	0.739	CCGCGTGCC
1778	mamo-s	BGIBMGA002239	up	1769	1777	-	11.3303	4.96e-05	0.615	GTGGGTGGC
1779	mamo-s	BGIBMGA002240	down	230	238	+	10.7523	8.38e-05	0.797	AAGCGTGGC
1780	mamo-s	BGIBMGA002240	up	1719	1727	+	10.7523	8.38e-05	0.797	AAGCGTGGC
1781	mamo-s	BGIBMGA002244	up	621	629	-	11.2844	5.18e-05	0.63	CTGCGTGCC
1782	mamo-s	BGIBMGA002248	down	334	342	+	11.3303	4.96e-05	0.615	GTGGGTGGC
1783	mamo-s	BGIBMGA002249	down	256	264	-	11.3303	4.96e-05	0.615	GTGGGTGGC
1784	mamo-s	BGIBMGA002251	down	242	250	+	11.0826	6.84e-05	0.709	GTACGTGGC
1785	mamo-s	BGIBMGA002254	up	1474	1482	-	11.3303	4.96e-05	0.615	GTGGGTGGC
1786	mamo-s	BGIBMGA002254	up	471	479	-	11.2844	5.18e-05	0.63	CTGCGTGCC
1787	mamo-s	BGIBMGA002254	down	627	635	-	11.1743	5.9e-05	0.684	CCGCGTGTC
1788	mamo-s	BGIBMGA002254	up	52	60	-	11.0826	6.84e-05	0.709	GTACGTGGC
1789	mamo-s	BGIBMGA002255	down	1358	1366	+	11.3303	4.96e-05	0.615	GTGGGTGGC
1790	mamo-s	BGIBMGA002255	up	1424	1432	-	11.3303	4.96e-05	0.615	GTGGGTGGC
1791	mamo-s	BGIBMGA002255	down	1901	1909	-	11.3303	4.96e-05	0.615	GTGGGTGGC
1792	mamo-s	BGIBMGA002255	down	1010	1018	+	11.0826	6.84e-05	0.709	GTACGTGGC
1793	mamo-s	BGIBMGA002255	up	1664	1672	-	10.5413	9.42e-05	0.857	CAGCGTGTC
1794	mamo-s	BGIBMGA002255	up	1034	1042	+	10.5138	9.75e-05	0.865	GTGCGTGTT
1795	mamo-s	BGIBMGA002256	down	320	328	+	11.3303	4.96e-05	0.615	GTGGGTGGC
1796	mamo-s	BGIBMGA002256	down	1509	1517	+	11.3303	4.96e-05	0.615	GTGGGTGGC
1797	mamo-s	BGIBMGA002257	up	1599	1607	+	11.3303	4.96e-05	0.615	GTGGGTGGC
1798	mamo-s	BGIBMGA002263	up	1599	1607	+	13.0275	8.53e-06	0.615	GAGCGTGGC
1799	mamo-s	BGIBMGA002264	up	563	571	+	10.8349	7.66e-05	0.751	CCGCGAGGC
1800	mamo-s	BGIBMGA002265	down	1294	1302	+	12.1835	1.71e-05	0.615	GTGCGTGCC
1801	mamo-s	BGIBMGA002266	up	96	104	-	13.6606	4.06e-06	0.615	GCGCGTGGC
1802	mamo-s	BGIBMGA002266	up	437	445	-	11.3303	4.96e-05	0.615	GTGGGTGGC
1803	mamo-s	BGIBMGA002266	up	1637	1645	-	11.0826	6.84e-05	0.709	GTACGTGGC
1804	mamo-s	BGIBMGA002267	down	1351	1359	-	11.1009	6.57e-05	0.709	GAGCGAGGC
1805	mamo-s	BGIBMGA002269	up	87	95	+	11.2844	5.18e-05	0.63	CTGCGTGCC
1806	mamo-s	BGIBMGA002269	up	1172	1180	-	10.5688	8.88e-05	0.824	GTGCGTGAC
1807	mamo-s	BGIBMGA002270	down	1913	1921	-	11.3303	4.96e-05	0.615	GTGGGTGGC
1808	mamo-s	BGIBMGA002271	down	1663	1671	+	11.3303	4.96e-05	0.615	GTGGGTGGC
1809	mamo-s	BGIBMGA002271	up	1754	1762	+	11.3303	4.96e-05	0.615	GTGGGTGGC
1810	mamo-s	BGIBMGA002272	down	896	904	+	11.4404	4.51e-05	0.615	CGGCGTGGC
1811	mamo-s	BGIBMGA002274	up	1632	1640	+	11.3303	4.96e-05	0.615	GTGGGTGGC
1812	mamo-s	BGIBMGA002275	up	1520	1528	+	14.055	2.23e-06	0.615	GTGCGTGGC
1813	mamo-s	BGIBMGA002276	down	1408	1416	+	11.3303	4.96e-05	0.615	GTGGGTGGC
1814	mamo-s	BGIBMGA002276	down	955	963	-	10.5138	9.75e-05	0.865	GTGCGTGTT
1815	mamo-s	BGIBMGA002277	up	509	517	+	11.3303	4.96e-05	0.615	GTGGGTGGC
1816	mamo-s	BGIBMGA002278	up	820	828	-	11.3303	4.96e-05	0.615	GTGGGTGGC
1817	mamo-s	BGIBMGA002278	up	664	672	+	10.5413	9.42e-05	0.857	CAGCGTGTC
1818	mamo-s	BGIBMGA002279	up	342	350	-	11.0826	6.84e-05	0.709	GTACGTGGC
1819	mamo-s	BGIBMGA002280	down	1364	1372	+	11.3303	4.96e-05	0.615	GTGGGTGGC
1820	mamo-s	BGIBMGA002281	down	1184	1192	-	11.3303	4.96e-05	0.615	GTGGGTGGC
1821	mamo-s	BGIBMGA002281	up	1750	1758	-	11.3303	4.96e-05	0.615	GTGGGTGGC
1822	mamo-s	BGIBMGA002282	down	1510	1518	-	10.9358	7.3e-05	0.728	GCGGGTGGC
1823	mamo-s	BGIBMGA002283	down	1044	1052	+	11.3303	4.96e-05	0.615	GTGGGTGGC
1824	mamo-s	BGIBMGA002284	up	1598	1606	-	11.7798	3.11e-05	0.615	ATGCGTGGC
1825	mamo-s	BGIBMGA002284	up	248	256	+	11.3303	4.96e-05	0.615	GTGGGTGGC
1826	mamo-s	BGIBMGA002285	down	1454	1462	-	11.3303	4.96e-05	0.615	GTGGGTGGC
1827	mamo-s	BGIBMGA002287	up	341	349	+	11.3303	4.96e-05	0.615	GTGGGTGGC
1828	mamo-s	BGIBMGA002287	down	1385	1393	-	10.7523	8.38e-05	0.797	AAGCGTGGC
1829	mamo-s	BGIBMGA002289	up	1280	1288	+	11.2844	5.18e-05	0.63	CTGCGTGCC
1830	mamo-s	BGIBMGA002290	up	404	412	+	11.3303	4.96e-05	0.615	GTGGGTGGC
1831	mamo-s	BGIBMGA002290	down	926	934	+	11.3303	4.96e-05	0.615	GTGGGTGGC
1832	mamo-s	BGIBMGA002290	up	1678	1686	-	11.3303	4.96e-05	0.615	GTGGGTGGC
1833	mamo-s	BGIBMGA002290	down	1897	1905	+	11.3303	4.96e-05	0.615	GTGGGTGGC
1834	mamo-s	BGIBMGA002291	down	1144	1152	-	11.3303	4.96e-05	0.615	GTGGGTGGC
1835	mamo-s	BGIBMGA002292	up	1898	1906	+	11.4404	4.51e-05	0.615	CGGCGTGGC
1836	mamo-s	BGIBMGA002298	up	1722	1730	+	11.3303	4.96e-05	0.615	GTGGGTGGC
1837	mamo-s	BGIBMGA002301	up	1846	1854	-	11.7064	3.52e-05	0.615	GCGCGTGGT
1838	mamo-s	BGIBMGA002301	up	159	167	+	11.5688	3.79e-05	0.615	CTGCGTGTC
1839	mamo-s	BGIBMGA002301	down	149	157	+	11.3303	4.96e-05	0.615	GTGGGTGGC
1840	mamo-s	BGIBMGA002301	up	436	444	-	11.3303	4.96e-05	0.615	GTGGGTGGC
1841	mamo-s	BGIBMGA002303	down	1842	1850	+	12.7615	1.04e-05	0.615	CCGCGTGGC
1842	mamo-s	BGIBMGA002304	down	1570	1578	-	11.4404	4.51e-05	0.615	CGGCGTGGC
1843	mamo-s	BGIBMGA002305	down	1474	1482	-	11.3303	4.96e-05	0.615	GTGGGTGGC
1844	mamo-s	BGIBMGA002305	down	243	251	-	11.2844	5.18e-05	0.63	CTGCGTGCC
1845	mamo-s	BGIBMGA002305	up	1704	1712	+	10.5688	8.88e-05	0.824	GTGCGTGAC
1846	mamo-s	BGIBMGA002306	up	467	475	+	11.3303	4.96e-05	0.615	GTGGGTGGC
1847	mamo-s	BGIBMGA002306	down	1080	1088	+	11.3303	4.96e-05	0.615	GTGGGTGGC
1848	mamo-s	BGIBMGA002306	down	624	632	-	11.1743	5.9e-05	0.684	CCGCGTGTC
1849	mamo-s	BGIBMGA002307	up	1043	1051	+	11.2294	5.41e-05	0.65	CTGCGAGGC
1850	mamo-s	BGIBMGA002307	down	1797	1805	-	11.0826	6.84e-05	0.709	GTACGTGGC
1851	mamo-s	BGIBMGA002308	up	743	751	+	11.3303	4.96e-05	0.615	GTGGGTGGC
1852	mamo-s	BGIBMGA002308	down	1932	1940	+	11.3303	4.96e-05	0.615	GTGGGTGGC
1853	mamo-s	BGIBMGA002309	up	743	751	+	11.0826	6.84e-05	0.709	GTACGTGGC
1854	mamo-s	BGIBMGA002311	up	337	345	+	11.3303	4.96e-05	0.615	GTGGGTGGC
1855	mamo-s	BGIBMGA002311	down	1425	1433	-	11.3303	4.96e-05	0.615	GTGGGTGGC
1856	mamo-s	BGIBMGA002312	up	988	996	-	11.3303	4.96e-05	0.615	GTGGGTGGC
1857	mamo-s	BGIBMGA002313	up	1575	1583	+	14.055	2.23e-06	0.615	GTGCGTGGC
1858	mamo-s	BGIBMGA002313	up	684	692	+	11.3303	4.96e-05	0.615	GTGGGTGGC
1859	mamo-s	BGIBMGA002313	up	1076	1084	-	11.3303	4.96e-05	0.615	GTGGGTGGC
1860	mamo-s	BGIBMGA002314	down	1220	1228	-	11.3303	4.96e-05	0.615	GTGGGTGGC
1861	mamo-s	BGIBMGA002316	up	1828	1836	-	11.3303	4.96e-05	0.615	GTGGGTGGC
1862	mamo-s	BGIBMGA002317	up	351	359	+	11.3303	4.96e-05	0.615	GTGGGTGGC
1863	mamo-s	BGIBMGA002318	down	1299	1307	-	11.3303	4.96e-05	0.615	GTGGGTGGC
1864	mamo-s	BGIBMGA002319	down	578	586	-	11.0826	6.84e-05	0.709	GTACGTGGC
1865	mamo-s	BGIBMGA002320	up	654	662	-	11.3303	4.96e-05	0.615	GTGGGTGGC
1866	mamo-s	BGIBMGA002320	up	1475	1483	-	11.3303	4.96e-05	0.615	GTGGGTGGC
1867	mamo-s	BGIBMGA002321	up	372	380	+	11.3303	4.96e-05	0.615	GTGGGTGGC
1868	mamo-s	BGIBMGA002321	up	1406	1414	-	10.5688	8.88e-05	0.824	GTGCGTGAC
1869	mamo-s	BGIBMGA002323	up	1708	1716	-	11.0826	6.84e-05	0.709	GTACGTGGC
1870	mamo-s	BGIBMGA002324	up	684	692	+	11.3303	4.96e-05	0.615	GTGGGTGGC
1871	mamo-s	BGIBMGA002325	up	672	680	+	12.7615	1.04e-05	0.615	CCGCGTGGC
1872	mamo-s	BGIBMGA002325	up	435	443	-	11.3853	4.74e-05	0.615	ACGCGTGGC
1873	mamo-s	BGIBMGA002326	up	1590	1598	-	11.3303	4.96e-05	0.615	GTGGGTGGC
1874	mamo-s	BGIBMGA002328	down	712	720	+	11.3303	4.96e-05	0.615	GTGGGTGGC
1875	mamo-s	BGIBMGA002329	down	1036	1044	-	11.7064	3.52e-05	0.615	GCGCGTGGT
1876	mamo-s	BGIBMGA002329	down	626	634	-	11.3303	4.96e-05	0.615	GTGGGTGGC
1877	mamo-s	BGIBMGA002331	down	1737	1745	-	11.4404	4.51e-05	0.615	GAGCGTGTC
1878	mamo-s	BGIBMGA002331	up	635	643	-	11.0826	6.84e-05	0.709	GTACGTGGC
1879	mamo-s	BGIBMGA002332	down	1575	1583	-	12.1009	2.43e-05	0.615	GTGCGTGGT
1880	mamo-s	BGIBMGA002332	down	512	520	+	11.3303	4.96e-05	0.615	GTGGGTGGC
1881	mamo-s	BGIBMGA002333	down	191	199	-	11.3303	4.96e-05	0.615	GTGGGTGGC
1882	mamo-s	BGIBMGA002333	up	973	981	-	11.3303	4.96e-05	0.615	GTGGGTGGC
1883	mamo-s	BGIBMGA002333	up	1458	1466	+	11.3303	4.96e-05	0.615	GTGGGTGGC
1884	mamo-s	BGIBMGA002334	down	152	160	-	11.3303	4.96e-05	0.615	GTGGGTGGC
1885	mamo-s	BGIBMGA002334	up	1013	1021	-	11.3303	4.96e-05	0.615	GTGGGTGGC
1886	mamo-s	BGIBMGA002334	up	1718	1726	+	11.3303	4.96e-05	0.615	GTGGGTGGC
1887	mamo-s	BGIBMGA002335	up	1341	1349	-	11.0826	6.84e-05	0.709	GTACGTGGC
1888	mamo-s	BGIBMGA002336	down	571	579	+	11.3303	4.96e-05	0.615	GTGGGTGGC
1889	mamo-s	BGIBMGA002337	down	1598	1606	+	11.3303	4.96e-05	0.615	GTGGGTGGC
1890	mamo-s	BGIBMGA002338	down	181	189	+	11.3303	4.96e-05	0.615	GTGGGTGGC
1891	mamo-s	BGIBMGA002338	down	1748	1756	+	10.7523	8.38e-05	0.797	AAGCGTGGC
1892	mamo-s	BGIBMGA002339	down	680	688	-	14.055	2.23e-06	0.615	GTGCGTGGC
1893	mamo-s	BGIBMGA002339	up	1899	1907	+	10.8899	7.48e-05	0.739	CCGCGTGCC
1894	mamo-s	BGIBMGA002343	up	598	606	+	11.3303	4.96e-05	0.615	GTGGGTGGC
1895	mamo-s	BGIBMGA002344	up	126	134	+	11.3303	4.96e-05	0.615	GTGGGTGGC
1896	mamo-s	BGIBMGA002344	down	1260	1268	+	11.3303	4.96e-05	0.615	GTGGGTGGC
1897	mamo-s	BGIBMGA002345	up	1651	1659	-	12.1009	2.43e-05	0.615	GTGCGTGGT
1898	mamo-s	BGIBMGA002348	down	416	424	-	11.2844	5.18e-05	0.63	CTGCGTGCC
1899	mamo-s	BGIBMGA002350	down	1063	1071	+	10.7523	8.38e-05	0.797	GGGCGTGTC
1900	mamo-s	BGIBMGA002351	down	986	994	+	11.3303	4.96e-05	0.615	GTGGGTGGC
1901	mamo-s	BGIBMGA002354	up	100	108	-	10.7523	8.38e-05	0.797	AAGCGTGGC
1902	mamo-s	BGIBMGA002355	down	1521	1529	-	11.3303	4.96e-05	0.615	GTGGGTGGC
1903	mamo-s	BGIBMGA002356	down	292	300	-	12.3394	1.49e-05	0.615	GGGCGTGGC
1904	mamo-s	BGIBMGA002356	up	263	271	-	10.5413	9.42e-05	0.857	GTGCGAGTC
1905	mamo-s	BGIBMGA002357	down	111	119	-	11.3303	4.96e-05	0.615	GTGGGTGGC
1906	mamo-s	BGIBMGA002358	up	577	585	-	11.1743	5.9e-05	0.684	CCGCGTGTC
1907	mamo-s	BGIBMGA002358	up	1622	1630	+	11.1376	6.35e-05	0.709	TCGCGTGGC
1908	mamo-s	BGIBMGA002359	down	1661	1669	-	11.3303	4.96e-05	0.615	GTGGGTGGC
1909	mamo-s	BGIBMGA002360	up	592	600	+	11.3303	4.96e-05	0.615	GTGGGTGGC
1910	mamo-s	BGIBMGA002362	down	662	670	+	13.156	6.3e-06	0.615	CTGCGTGGC
1911	mamo-s	BGIBMGA002363	up	896	904	-	11.3303	4.96e-05	0.615	GTGGGTGGC
1912	mamo-s	BGIBMGA002363	down	1792	1800	+	11.3303	4.96e-05	0.615	GTGGGTGGC
1913	mamo-s	BGIBMGA002364	up	1979	1987	+	10.5688	8.88e-05	0.824	GTGCGTGAC
1914	mamo-s	BGIBMGA002365	down	1488	1496	+	11.3303	4.96e-05	0.615	GTGGGTGGC
1915	mamo-s	BGIBMGA002366	up	810	818	+	11.3303	4.96e-05	0.615	GTGGGTGGC
1916	mamo-s	BGIBMGA002367	down	279	287	+	11.2294	5.41e-05	0.65	CTGCGAGGC
1917	mamo-s	BGIBMGA002368	up	131	139	+	11.1743	5.9e-05	0.684	CCGCGTGTC
1918	mamo-s	BGIBMGA002368	down	1104	1112	+	11.0826	6.84e-05	0.709	GTACGTGGC
1919	mamo-s	BGIBMGA002369	up	346	354	-	11.3303	4.96e-05	0.615	GTGGGTGGC
1920	mamo-s	BGIBMGA002369	down	378	386	-	11.0826	6.84e-05	0.709	GTACGTGGC
1921	mamo-s	BGIBMGA002369	down	1228	1236	+	10.5413	9.42e-05	0.857	CAGCGTGTC
1922	mamo-s	BGIBMGA002371	down	1728	1736	-	13.6606	4.06e-06	0.615	GCGCGTGGC
1923	mamo-s	BGIBMGA002375	up	1435	1443	+	11.3303	4.96e-05	0.615	GTGGGTGGC
1924	mamo-s	BGIBMGA002376	up	1191	1199	-	11.3303	4.96e-05	0.615	GTGGGTGGC
1925	mamo-s	BGIBMGA002377	down	174	182	+	11.5688	3.79e-05	0.615	CTGCGTGTC
1926	mamo-s	BGIBMGA002380	down	1207	1215	-	11.3303	4.96e-05	0.615	GTGGGTGGC
1927	mamo-s	BGIBMGA002382	up	1133	1141	+	11.0734	7.12e-05	0.726	GAGCGTGGT
1928	mamo-s	BGIBMGA002385	up	396	404	-	11.3303	4.96e-05	0.615	GTGGGTGGC
1929	mamo-s	BGIBMGA002385	up	1099	1107	-	11.3303	4.96e-05	0.615	GTGGGTGGC
1930	mamo-s	BGIBMGA002387	up	512	520	-	13.6606	4.06e-06	0.615	GCGCGTGGC
1931	mamo-s	BGIBMGA002388	down	875	883	+	11.3303	4.96e-05	0.615	GTGGGTGGC
1932	mamo-s	BGIBMGA002389	down	1105	1113	-	11.0826	6.84e-05	0.709	GTACGTGGC
1933	mamo-s	BGIBMGA002390	up	692	700	-	11.3303	4.96e-05	0.615	GTGGGTGGC
1934	mamo-s	BGIBMGA002390	down	1075	1083	+	11.3303	4.96e-05	0.615	GTGGGTGGC
1935	mamo-s	BGIBMGA002391	up	1018	1026	-	11.3303	4.96e-05	0.615	GTGGGTGGC
1936	mamo-s	BGIBMGA002391	up	1765	1773	+	11.3303	4.96e-05	0.615	GTGGGTGGC
1937	mamo-s	BGIBMGA002394	up	411	419	+	12.1009	2.43e-05	0.615	GTGCGTGGT
1938	mamo-s	BGIBMGA002394	down	1206	1214	+	11.789	2.84e-05	0.615	GCGCGTGCC
1939	mamo-s	BGIBMGA002395	up	1340	1348	-	11.3303	4.96e-05	0.615	GTGGGTGGC
1940	mamo-s	BGIBMGA002396	down	1205	1213	+	11.3303	4.96e-05	0.615	GTGGGTGGC
1941	mamo-s	BGIBMGA002397	up	1782	1790	+	11.3303	4.96e-05	0.615	GTGGGTGGC
1942	mamo-s	BGIBMGA002399	up	1983	1991	-	11.7339	3.29e-05	0.615	GCGCGAGGC
1943	mamo-s	BGIBMGA002400	up	211	219	+	11.0734	7.12e-05	0.726	GAGCGTGGT
1944	mamo-s	BGIBMGA002401	up	98	106	-	11.3303	4.96e-05	0.615	GTGGGTGGC
1945	mamo-s	BGIBMGA002401	down	306	314	+	11.3303	4.96e-05	0.615	GTGGGTGGC
1946	mamo-s	BGIBMGA002401	up	460	468	+	11.3303	4.96e-05	0.615	GTGGGTGGC
1947	mamo-s	BGIBMGA002403	down	1668	1676	-	12.0734	2.66e-05	0.615	GCGCGTGTC
1948	mamo-s	BGIBMGA002404	up	145	153	-	11.4404	4.51e-05	0.615	CGGCGTGGC
1949	mamo-s	BGIBMGA002407	up	256	264	+	11.3303	4.96e-05	0.615	GTGGGTGGC
1950	mamo-s	BGIBMGA002411	up	1135	1143	-	11.3303	4.96e-05	0.615	GTGGGTGGC
1951	mamo-s	BGIBMGA002415	down	1155	1163	-	11.3303	4.96e-05	0.615	GTGGGTGGC
1952	mamo-s	BGIBMGA002418	up	1354	1362	-	11.3303	4.96e-05	0.615	GTGGGTGGC
1953	mamo-s	BGIBMGA002418	down	1667	1675	-	11.3303	4.96e-05	0.615	GTGGGTGGC
1954	mamo-s	BGIBMGA002419	up	464	472	+	11.3303	4.96e-05	0.615	GTGGGTGGC
1955	mamo-s	BGIBMGA002420	up	1576	1584	-	11.3303	4.96e-05	0.615	GTGGGTGGC
1956	mamo-s	BGIBMGA002421	up	434	442	-	11.3303	4.96e-05	0.615	GTGGGTGGC
1957	mamo-s	BGIBMGA002422	up	1615	1623	-	11.3303	4.96e-05	0.615	GTGGGTGGC
1958	mamo-s	BGIBMGA002422	down	1546	1554	-	11.1376	6.35e-05	0.709	TCGCGTGGC
1959	mamo-s	BGIBMGA002425	down	486	494	-	11.4404	4.51e-05	0.615	CGGCGTGGC
1960	mamo-s	BGIBMGA002426	down	1826	1834	-	11.5321	4.06e-05	0.615	TTGCGTGGC
1961	mamo-s	BGIBMGA002426	down	1267	1275	-	10.5138	9.75e-05	0.865	GTGCGTGTT
1962	mamo-s	BGIBMGA002427	down	825	833	-	10.5138	9.75e-05	0.865	GTGCGTGTT
1963	mamo-s	BGIBMGA002430	up	848	856	-	11.5321	4.06e-05	0.615	TTGCGTGGC
1964	mamo-s	BGIBMGA002430	down	1567	1575	+	11.3303	4.96e-05	0.615	GTGGGTGGC
1965	mamo-s	BGIBMGA002432	up	867	875	-	11.3303	4.96e-05	0.615	GTGGGTGGC
1966	mamo-s	BGIBMGA002432	down	1660	1668	+	11.3303	4.96e-05	0.615	GTGGGTGGC
1967	mamo-s	BGIBMGA002432	up	1868	1876	+	11.156	6.13e-05	0.705	GAGCGTGCC
1968	mamo-s	BGIBMGA002433	up	994	1002	+	11.2294	5.41e-05	0.65	CTGCGAGGC
1969	mamo-s	BGIBMGA002433	down	519	527	-	11.1009	6.57e-05	0.709	GAGCGAGGC
1970	mamo-s	BGIBMGA002435	up	1267	1275	-	12.0734	2.66e-05	0.615	GCGCGTGTC
1971	mamo-s	BGIBMGA002435	down	1518	1526	-	11.3303	4.96e-05	0.615	GTGGGTGGC
1972	mamo-s	BGIBMGA002436	down	1505	1513	+	11.3853	4.74e-05	0.615	ACGCGTGGC
1973	mamo-s	BGIBMGA002437	up	1213	1221	+	11.3853	4.74e-05	0.615	ACGCGTGGC
1974	mamo-s	BGIBMGA002438	up	966	974	+	11.3303	4.96e-05	0.615	GTGGGTGGC
1975	mamo-s	BGIBMGA002441	down	1501	1509	-	11.7798	3.11e-05	0.615	ATGCGTGGC
1976	mamo-s	BGIBMGA002441	up	1708	1716	-	11.3303	4.96e-05	0.615	GTGGGTGGC
1977	mamo-s	BGIBMGA002442	up	261	269	+	11.3303	4.96e-05	0.615	GTGGGTGGC
1978	mamo-s	BGIBMGA002445	up	1470	1478	-	12.1835	1.71e-05	0.615	GTGCGTGCC
1979	mamo-s	BGIBMGA002446	up	1401	1409	+	11.3303	4.96e-05	0.615	GTGGGTGGC
1980	mamo-s	BGIBMGA002447	up	625	633	-	12.1284	2.16e-05	0.615	CAGCGTGGC
1981	mamo-s	BGIBMGA002448	up	963	971	+	11.3303	4.96e-05	0.615	GTGGGTGGC
1982	mamo-s	BGIBMGA002448	down	1656	1664	-	11.3303	4.96e-05	0.615	GTGGGTGGC
1983	mamo-s	BGIBMGA002450	up	883	891	-	10.5413	9.42e-05	0.857	CAGCGTGTC
1984	mamo-s	BGIBMGA002452	up	398	406	+	11.5688	3.79e-05	0.615	CTGCGTGTC
1985	mamo-s	BGIBMGA002455	up	1482	1490	+	10.9358	7.3e-05	0.728	GCGGGTGGC
1986	mamo-s	BGIBMGA002456	down	1550	1558	-	10.5413	9.42e-05	0.857	GTGCGAGTC
1987	mamo-s	BGIBMGA002458	up	433	441	+	11.1743	5.9e-05	0.684	CCGCGTGTC
1988	mamo-s	BGIBMGA002461	up	743	751	-	11.1743	5.9e-05	0.684	CCGCGTGTC
1989	mamo-s	BGIBMGA002462	up	1607	1615	-	11.3303	4.96e-05	0.615	GTGGGTGGC
1990	mamo-s	BGIBMGA002463	down	129	137	-	11.3303	4.96e-05	0.615	GTGGGTGGC
1991	mamo-s	BGIBMGA002463	down	1246	1254	-	11.0826	6.84e-05	0.709	GTACGTGGC
1992	mamo-s	BGIBMGA002464	down	606	614	-	11.3303	4.96e-05	0.615	GTGGGTGGC
1993	mamo-s	BGIBMGA002465	up	1136	1144	-	11.0826	6.84e-05	0.709	GTACGTGGC
1994	mamo-s	BGIBMGA002466	down	1919	1927	+	11.1009	6.57e-05	0.709	GAGCGAGGC
1995	mamo-s	BGIBMGA002467	down	477	485	-	11.0826	6.84e-05	0.709	GTACGTGGC
1996	mamo-s	BGIBMGA002468	up	447	455	+	12.1284	2.16e-05	0.615	GTGCGAGGC
1997	mamo-s	BGIBMGA002468	up	849	857	+	11.1376	6.35e-05	0.709	TCGCGTGGC
1998	mamo-s	BGIBMGA002469	down	268	276	-	11.3303	4.96e-05	0.615	GTGGGTGGC
[truncated: 10,554 more rows]
