# Supplementary material for: The BTB-ZF gene Bm-mamo regulates pigmentation in silkworm caterpillars
Source: eLife. 2024 Apr 8;12:RP90795. doi: 10.7554/eLife.90795 (PMC11001300; doi:10.7554/eLife.90795)
Supplement: Supplementary file 5. [file elife-90795-supp5.xlsx]

## Sheet: Sheet1
Supplementary Table S5. Differentially expressed genes between bd/bd and +/bd individulas
Number	classification	Gene_id	readcount_bd/bd	readcount_+/bd	log2.Fold_change.	pvalue	qvalue	Signature	Blast against nr database
									E-value	Best hit
1	Cuticular protein	BGIBMGA000324	348.707	40.5488	3.1043	1.1629e-52	3.7028e-50	TRUE	7e-65	ref|NP_001037001.1| cuticular protein RR-1 motif 46 precursor [Bombyx mori]
2		BGIBMGA000326	4.38323	29.3063	-2.7411	7.4631e-07	3.9881e-05	TRUE	1e-69	ref|NP_001166710.1| cuticular protein RR-1 motif 44 precursor [Bombyx mori]
3		BGIBMGA000328	388.188	29.9481	3.6962	4.8524e-69	2.0043e-66	TRUE	3e-97	ref|NP_001166712.1| cuticular protein RR-1 motif 42 precursor [Bombyx mori]
4		BGIBMGA000329	2149.25	458.752	2.228	1.7962e-205	1.5251e-202	TRUE	1e-126	tpd|FAA00544.1| TPA: putative cuticle protein [Bombyx mori]
5		BGIBMGA000333	2378.36	363.964	2.7081	1.7692e-296	2.7039e-293	TRUE	1e-108	ref|NP_001036828.1| larval cuticle protein LCP-22 precursor [Bombyx mori]
6		BGIBMGA000341	342.884	97.2124	1.8185	2.6736e-25	4.4902e-23	TRUE	2e-46	ref|NP_001166722.1| cuticular protein RR-1 motif 28 precursor [Bombyx mori]
7		BGIBMGA000520	72.2113	25.4559	1.5042	5.6876e-05	0.0020996	TRUE	2e-58	ref|NP_001036950.1| cuticular protein tweedle motif 2 precursor [Bombyx mori]
8		BGIBMGA002384	1017.07	438.739	1.213	3.2473e-34	6.99e-32	TRUE	6e-93	ref|NP_001166790.1| cuticular protein glycine-rich 13 precursor [Bombyx mori]
9		BGIBMGA002548	1005.52	112.353	3.1618	2.7804e-151	1.7706e-148	TRUE	5e-50	ref|NP_001036835.1| cuticular protein RR-1 motif 4 precursor [Bombyx mori]
10		BGIBMGA002549	1671.13	243.625	2.7781	1.3266e-215	1.1926e-212	TRUE	3e-61	ref|NP_001166743.1| cuticular protein RR-1 motif 5 precursor [Bombyx mori]
11		BGIBMGA005259	274.672	55.4277	2.309	3.2753e-29	6.0309e-27	TRUE	4e-35	ref|NP_001036951.1| cuticular protein tweedle motif 3 [Bombyx mori]
12		BGIBMGA005277	2831.28	69.4986	5.3483	0	0	TRUE	3e-87	tpd|FAA00504.1| TPA: putative cuticle protein [Bombyx mori]
13		BGIBMGA005278	369.631	53.6689	2.7839	2.8627e-49	8.4136e-47	TRUE	3e-51	ref|NP_001166744.1| cuticular protein RR-1 motif 3 precursor [Bombyx mori]
14		BGIBMGA008255	2642.03	421.27	2.6488	0	0	TRUE	/	No hits
15		BGIBMGA011761	90.4161	37.2212	1.2805	0.00012032	0.0041321	TRUE	1e-16	ref|NP_001166758.1| cuticular protein hypothetical 19 precursor [Bombyx mori]
16		BGIBMGA011765	1789	63.2713	4.8215	0	0	TRUE	0.003	ref|NP_001166753.1| cuticular protein hypothetical 24 precursor [Bombyx mori]
17		BGIBMGA011766	1440.9	301.335	2.2575	4.7063e-141	2.6639e-138	TRUE	1e-07	ref|XP_045887395.1| flocculation protein FLO11-like [Micropterus dolomieu]
18		BGIBMGA012601	381.917	1253.18	-1.7143	1.9537e-142	1.1484e-139	TRUE	1e-168	ref|NP_001166737.1| cuticular protein RR-1 motif 11 precursor [Bombyx mori]
19		Novel01073	221.177	61.964	1.8357	3.9885e-17	4.549e-15	TRUE	1e-56	ref|NP_001157379.1|cuticular protein CPFL family 1 precursor [Bombyx mori]
20	Antibacterial peptide	BGIBMGA000021	221.721	69.8313	1.6668	9.2957e-15	9.2853e-13	TRUE	8e-37	ref|NP_001037460.1| cecropin-B precursor [Bombyx mori]
21		BGIBMGA000023	82.4815	25.6936	1.6827	1.8819e-06	9.5552e-05	TRUE	8e-37	ref|NP_001037460.1| cecropin-B precursor [Bombyx mori]
22		BGIBMGA000024	56.886	18.0877	1.6531	9.7881e-05	0.0034628	TRUE	8e-37	ref|NP_001037460.1| cecropin-B precursor [Bombyx mori]
23		BGIBMGA000039	25.2116	3.58902	2.8124	0.00010558	0.0037181	TRUE	2e-20	ref|NP_001091844.1| antibacterial peptide enbocin 2 precursor [Bombyx mori]
24		BGIBMGA002739	188.127	47.1326	1.9969	9.2826e-17	1.0355e-14	TRUE	7e-142	ref|XP_004926758.1| attacin-like [Bombyx mori]
25		BGIBMGA002747	127.082	32.1823	1.9814	1.1187e-11	9.4461e-10	TRUE	1e-142	ref|NP_001037006.1| attacin precursor [Bombyx mori]
26		BGIBMGA005658	98.5106	11.5039	3.0982	5.1287e-16	5.4432e-14	TRUE	1e-125	ref|NP_001037683.1| gloverin 2 precursor [Bombyx mori]
27		BGIBMGA005948	267.665	67.2881	1.992	4.2779e-23	6.2865e-21	TRUE	1e-103	ref|NP_001165397.1| C-type lectin 4 precursor [Bombyx mori]
28		BGIBMGA006280	224.6	88.6321	1.3415	2.1084e-10	1.5952e-08	TRUE	1e-22	ref|NP_001037462.1| cecropin-A precursor [Bombyx mori]
29		BGIBMGA006694	25.7875	65.8382	-1.3523	4.2345e-07	2.3113e-05	TRUE	0	ref|NP_001104817.1| hemocytin [Bombyx mori]
30		BGIBMGA006775	184.959	39.4316	2.2298	2.8565e-19	3.7312e-17	TRUE	1e-98	ref|NP_001119732.1| lebocin-3 precursor [Bombyx mori]
31		BGIBMGA011607	101.23	271.387	-1.4227	3.2869e-26	5.6442e-24	TRUE	0	ref|NP_001128672.1| beta-1,3-glucan recognition protein 3 precursor [Bombyx mori]
32		BGIBMGA013803	273.744	77.9363	1.8125	2.0494e-20	2.7474e-18	TRUE	1e-125	ref|NP_001093312.1| gloverin 3 precursor [Bombyx mori]
33		BGIBMGA013863	227	32.6577	2.7972	4.2967e-31	8.6403e-29	TRUE	1e-118	ref|NP_001036930.1| gloverin 1 precursor [Bombyx mori]
34		BGIBMGA014285	112.236	31.5168	1.8323	2.1796e-09	1.5073e-07	TRUE	1e-22	ref|NP_001037462.1| cecropin-A precursor [Bombyx mori]
35		Novel01661	191.678	94.0275	1.0275	1.0292e-05	0.00044558	TRUE	0	ref|NP_001036879.1|nimrod B precursor [Bombyx mori]
36		Novel02143	103.534	16.5665	2.6438	4.1069e-14	3.9788e-12	TRUE	9e-27	ref|NP_001037392.1|cecropin precursor [Bombyx mori]
37	Enzyme	BGIBMGA000291	5.663	24.9092	-2.137	5.2612e-05	0.0019564	TRUE	0	ref|XP_004931946.1| elongation of very long chain fatty acids protein AAEL008004 [Bombyx mori]
38		BGIBMGA000301	109.677	26.1214	2.07	6.5663e-11	5.2267e-09	TRUE	0	ref|XP_021207482.2| pancreatic triacylglycerol lipase isoform X2 [Bombyx mori]
39		BGIBMGA000402	19.1966	52.4804	-1.4509	2.4489e-06	0.00012231	TRUE	0	ref|KOB74522.1| putative multiple inositol polyphosphate phosphatase [Operophtera brumata]
40		BGIBMGA000424	22.428	62.1542	-1.4705	2.3438e-07	1.3169e-05	TRUE	3e-131	ref|XP_028030207.1| elongation of very long chain fatty acids protein AAEL008004-like [Bombyx mandarina]
41		BGIBMGA001333	178.465	65.3866	1.4486	1.0234e-09	7.309e-08	TRUE	0	ref|NP_001037382.1| uricase [Bombyx mori]
42		BGIBMGA001891	132.617	25.0993	2.4015	1.0866e-15	1.1375e-13	TRUE	0	ref|NP_001153673.1| carboxypeptidase B-like precursor [Bombyx mori]
43		BGIBMGA001968	118.219	20.3694	2.537	3.8622e-15	3.9351e-13	TRUE	2e-95	ref|XP_021208460.1| A disintegrin and metalloproteinase with thrombospondin motifs adt-2 isoform X2 [Bombyx mori]
44		BGIBMGA002432	23.0999	77.556	-1.7474	1.6719e-10	1.284e-08	TRUE	0	ref|XP_004931128.1| V-type proton ATPase 116 kDa subunit a1 [Bombyx mori]
45		BGIBMGA002457	9.24637	32.9429	-1.833	1.8845e-05	0.00075791	TRUE	0	ref|XP_004931115.1| retinal dehydrogenase 1 [Bombyx mori]
46		BGIBMGA002592	79.186	160.246	-1.017	3.6915e-11	2.985e-09	TRUE	9e-131	gb|AWK60411.1| prolyl oligopeptidase variant 1 [Bombyx mori]
47		BGIBMGA003461	923.773	352.223	1.3911	1.051e-40	2.5098e-38	TRUE	0	ref|XP_021206214.2| proclotting enzyme [Bombyx mori]
48		BGIBMGA004176	38.1693	6.91658	2.4643	1.1954e-05	0.0005075	TRUE	0	ref|XP_037873557.1| alpha-protein kinase 1 [Bombyx mori]
49		BGIBMGA004421	180.192	86.6593	1.0561	1.0219e-05	0.00044367	TRUE	9e-173	ref|XP_028029511.1| uncharacterized peptidase C1-like protein F26E4.3 [Bombyx mandarina]
50		BGIBMGA004655	21.0523	48.7013	-1.21	4.834e-05	0.0018107	TRUE	0	ref|XP_037870080.1| fatty acid synthase [Bombyx mori]
51		BGIBMGA005052	105.805	46.7998	1.1768	0.00013985	0.0047496	TRUE	1e-166	ref|NP_001036900.1| ecdysteroid-phosphate phosphatase [Bombyx mori]
52		BGIBMGA005320	136.712	34.987	1.9662	2.568e-12	2.2818e-10	TRUE	0	ref|XP_028039390.1| carboxypeptidase D-like isoform X2 [Bombyx mandarina]
53		BGIBMGA005321	53.2706	13.9758	1.9304	1.6738e-05	0.00068517	TRUE	3e-31	ref|XP_037868240.1| carboxypeptidase D isoform X1 [Bombyx mori]
54		BGIBMGA005695	135.944	65.1252	1.0617	0.00011545	0.0039921	TRUE	0	gb|AGN90922.1| acid lipase-1 [Bombyx mori]
55		BGIBMGA005785	169.922	70.1878	1.2756	1.5103e-07	8.8437e-06	TRUE	0	ref|XP_004923866.1| myrosinase 1 [Bombyx mori]
56		BGIBMGA006456	19.6765	51.9813	-1.4015	4.3695e-06	0.00020921	TRUE	0	ref|NP_001040411.1| carboxylesterase clade H, member 1 precursor [Bombyx mori]
57		BGIBMGA006745	79.9219	27.1197	1.5593	1.1919e-05	0.0005075	TRUE	0	dbj|BAG70891.1| laccase 2A [Bombyx mori]
58		BGIBMGA006816	165.827	339.269	-1.0328	2.4718e-22	3.4979e-20	TRUE	0	ref|XP_028041682.1| CAD protein isoform X1 [Bombyx mandarina]
59		BGIBMGA006874	1491.7	3830.48	-1.3606	0	0	TRUE	0	ref|XP_028042303.1| probable chitinase 10 [Bombyx mandarina]
60		BGIBMGA006885	104.526	43.1395	1.2768	3.7478e-05	0.0014428	TRUE	0	ref|XP_028031881.1| atrial natriuretic peptide-converting enzyme [Bombyx mandarina]
61		BGIBMGA008029	41.4647	91.9359	-1.1487	6.4296e-08	3.9305e-06	TRUE	1e-157	ref|XP_037868821.1| allantoicase [Bombyx mori]
62		BGIBMGA008709	8184.89	2064.44	1.9872	0	0	TRUE	0	ref|NP_001108407.1| chitinase precursor [Bombyx mori]
63		BGIBMGA008815	6.27089	25.4083	-2.0186	7.4315e-05	0.0026914	TRUE	7e-124	pdb|6KTH_A| Chain A, Juvenile hormone diol kinase [Bombyx mori]
64		BGIBMGA009184	214.522	57.5193	1.899	1.5553e-17	1.8285e-15	TRUE	0	gb|ADA67926.1| putative peptidase [Bombyx mori]
65		BGIBMGA009518	329.734	662.946	-1.0076	7.7729e-41	1.8856e-38	TRUE	5e-77	ref|XP_012552702.2| alpha-N-acetylgalactosaminidase isoform X2 [Bombyx mori]
66		BGIBMGA009614	361.44	177.383	1.0269	1.4208e-09	1.0006e-07	TRUE	5e-154	ref|XP_012545939.1| lysosomal thiol reductase IP30 isoform X2 [Bombyx mori]
67		BGIBMGA009743	251.22	58.0185	2.1144	9.4284e-24	1.4703e-21	TRUE	0	ref|XP_004933269.3| serine protease filzig [Bombyx mori]
68		BGIBMGA009744	122.314	33.2519	1.8791	1.7751e-10	1.3565e-08	TRUE	0	ref|XP_004933271.1| decaprenyl-diphosphate synthase subunit 2 [Bombyx mori]
69		BGIBMGA009750	484.331	198.489	1.2869	3.6417e-19	4.677e-17	TRUE	0	ref|XP_012551872.2| serine proteinase stubble [Bombyx mori]
70		BGIBMGA010214	6243.09	2291.91	1.4457	1.5412e-285	2.1413e-282	TRUE	0	ref|NP_001139703.1| serine protease inhibitor 10 precursor [Bombyx mori]
71		BGIBMGA010240	2602.07	706.632	1.8806	8.3194e-191	6.3572e-188	TRUE	0	dbj|BAB13481.1| chitinase precursor [Bombyx mori]
72		BGIBMGA010439	284.27	66.3136	2.0999	2.1254e-26	3.6913e-24	TRUE	5e-99	ref|NP_001037448.1| lysozyme precursor [Bombyx mori]
73		BGIBMGA010681	12.9257	40.7151	-1.6553	7.2255e-06	0.00032671	TRUE	0	ref|NP_001037018.1| acyl-CoA desaturase [Bombyx mori]
74		BGIBMGA010763	306.41	692.3	-1.1759	3.1653e-51	9.8724e-49	TRUE	0	gb|AFK85028.1| aminopeptidase N-12 [Bombyx mori]
75		BGIBMGA010764	199.357	422.22	-1.0826	5.8525e-29	1.0648e-26	TRUE	0	gb|AFK85028.1| aminopeptidase N-12 [Bombyx mori]
76		BGIBMGA011342	571.835	267.18	1.0978	2.2171e-16	2.4203e-14	TRUE	0	ref|NP_001037464.2| fibroinase precursor [Bombyx mori]
77		BGIBMGA012526	156.164	72.018	1.1166	1.2369e-05	0.00052076	TRUE	0	ref|XP_004925227.1| alanine--glyoxylate aminotransferase 2-like [Bombyx mori]
78		BGIBMGA012831	766.617	244.315	1.6498	2.9649e-46	8.2388e-44	TRUE	0	ref|XP_004928930.1| aldo-keto reductase AKR2E4 isoform X1 [Bombyx mori]
79		BGIBMGA012862	21.1803	57.2816	-1.4354	1.0015e-06	5.2777e-05	TRUE	2e-27	ref|XP_037872352.1| glucose dehydrogenase [FAD, quinone] [Bombyx mori]
80		BGIBMGA012863	87.9205	215.389	-1.2927	5.543e-19	7.0011e-17	TRUE	0	ref|XP_037872352.1| glucose dehydrogenase [FAD, quinone] [Bombyx mori]
81		BGIBMGA012997	58.3257	1.4974	5.2836	4.2545e-14	4.0894e-12	TRUE	0	ref|XP_004928920.1| glucose dehydrogenase [FAD, quinone]-like isoform X1 [Bombyx mori]
82		BGIBMGA013009	202.236	510.948	-1.3371	1.6347e-44	4.383e-42	TRUE	0	ref|XP_028043358.1| glucose dehydrogenase [FAD, quinone]-like [Bombyx mandarina]
83		BGIBMGA013737	29.0189	101.752	-1.81	8.2883e-14	7.8192e-12	TRUE	0	ref|XP_028030680.1| CLIP domain-containing serine protease 2-like [Bombyx mandarina]
84		BGIBMGA013816	80.8177	295.345	-1.8697	2.2523e-38	5.1377e-36	TRUE	0	ref|XP_028035390.1| hydroxylysine kinase isoform X1 [Bombyx mandarina]
85		BGIBMGA014198	416.886	199.107	1.0661	1.17e-11	9.8251e-10	TRUE	0	ref|XP_004927708.1| apyrase [Bombyx mori]
86		BGIBMGA014292	3013.1	589.335	2.3541	0	0	TRUE	1e-13	ref|KAG1657830.1| Heparan-alpha-glucosaminide N-acetyltransferase [Nymphon striatum]
87		BGIBMGA014453	35.0018	165.57	-2.2419	1.1664e-26	2.0489e-24	TRUE	0	gb|ADQ89807.1| aldo-keto reductase [Bombyx mori]
88		Novel00038	53.0466	108.597	-1.0337	3.7559e-08	2.3918e-06	TRUE	9e-34	gi|AWK60411.1| prolyl oligopeptidase variant 1 [Bombyx mori]
89		Novel00078	23.1639	49.6282	-1.0993	0.00011113	0.0038688	TRUE	1e-65	ref|XP_037868821.1|allantoicase [Bombyx mori]
90	Transcription factor	BGIBMGA000319	27.0352	110.071	-2.0255	1.4335e-16	1.5875e-14	TRUE	0	ref|XP_021207484.2| PR domain zinc finger protein 1 isoform X2 [Bombyx mori]
91		BGIBMGA000987	9.31036	40.4299	-2.1185	2.9248e-07	1.6137e-05	TRUE	9e-14	ref|AFI61405.1| OVO protein [Bombyx mori]
92		BGIBMGA000988	60.6613	262.711	-2.1146	5.5393e-39	1.3024e-36	TRUE	0	gb|XP_021204666.2| protein ovo isoform X1 [Bombyx mori]
93		BGIBMGA003874	62.133	20.7735	1.5806	9.2415e-05	0.0032922	TRUE	2e-142	ref|XP_012544801.1| hepatic leukemia factor isoform X11 [Bombyx mori]
94		BGIBMGA007065	1602.82	410.954	1.9636	9.415e-127	4.9617e-124	TRUE	1e-144	ref|XP_012551266.1| zinc finger protein hangover isoform X2 [Bombyx mori]
95	Transporter protein	BGIBMGA002430	7.10275	33.9174	-2.2556	1.2223e-06	6.3325e-05	TRUE	0	ref|XP_021206944.1| synaptic vesicle glycoprotein 2B isoform X1 [Bombyx mori]
96		BGIBMGA013242	19.6765	1.14088	4.1083	3.7626e-05	0.0014448	TRUE	0	ref|NP_001243989.1| major facilitator superfamily protein [Bombyx mori]
97		BGIBMGA013572	6.39887	28.0704	-2.1332	1.7984e-05	0.00072711	TRUE	0	ref|XP_004925280.1| lysosome membrane protein 2 isoform X2 [Bombyx mori]
98		BGIBMGA013576	152.293	70.3542	1.1141	1.6634e-05	0.00068337	TRUE	0	ref|XP_004925273.3| organic cation/carnitine transporter 7 [Bombyx mori]
99		BGIBMGA013656	151.749	59.6822	1.3463	1.5976e-07	9.3193e-06	TRUE	0	ref|XP_037874017.1| solute carrier family 2, facilitated glucose transporter member 6 [Bombyx mori]
100		BGIBMGA011016	91.4719	231.004	-1.3365	5.0693e-21	6.9173e-19	TRUE	0	ref|XP_004921746.1| organic cation transporter protein [Bombyx mori]
101	Cytochrome	BGIBMGA001162	117.675	466.548	-1.9872	1.3205e-63	4.9221e-61	TRUE	0	dbj|BAM73799.1| cytochrome P450 [Bombyx mori]
102		BGIBMGA001753	7.16674	96.642	-3.7533	6.0528e-24	9.5366e-22	TRUE	0	dbj|BAH47267.1| cytochrome P450 [Bombyx mori]
103		BGIBMGA006916	173.793	56.9964	1.6084	3.0564e-11	2.4979e-09	TRUE	0	ref|NP_001077078.1| cytochrome P450 18a1 [Bombyx mori]
104		BGIBMGA009522	163.811	67.5971	1.277	2.4448e-07	1.3686e-05	TRUE	0	dbj|BAM73845.1| cytochrome P450, partial [Bombyx mori]
105		BGIBMGA009523	203.548	60.1576	1.7586	7.1932e-15	7.2325e-13	TRUE	0	ref|NP_001274759.1| probable cytochrome P450 49a1-like [Bombyx mori]
106	other	BGIBMGA000010	591.224	148.433	1.9939	4.6733e-49	1.3476e-46	TRUE	1e-131	ref|NP_001129360.1| osiris 9 precursor [Bombyx mori]
107		BGIBMGA000012	1814.82	263.971	2.7814	2.5999e-234	2.8382e-231	TRUE	1e-136	ref|XP_004926115.1| uncharacterized protein LOC101741151 [Bombyx mori]
108		BGIBMGA000013	57.4299	10.8146	2.4088	1.246e-07	7.3526e-06	TRUE	1e-96	gi|389610551|dbj|BAM18887.1| osiris 9A [Papilio polytes]
109		BGIBMGA000025	74.2589	13.1439	2.4982	7.0749e-10	5.1489e-08	TRUE	0	ref|XP_004926131.1| uncharacterized protein LOC101743499 [Bombyx mori]
110		BGIBMGA000045	1239.4	157.608	2.9752	6.1495e-174	4.4754e-171	TRUE	1e-111	ref|XP_004926113.1| uncharacterized protein LOC101740865 [Bombyx mori]
111		BGIBMGA000590	368.767	179.76	1.0366	6.3829e-10	4.6675e-08	TRUE	6e-66	ref|NP_001108476.1| pleiotrophin-like protein precursor [Bombyx mori
112		BGIBMGA000691	2567.74	1262.93	1.0237	3.0423e-58	1.0108e-55	TRUE	0	ref|XP_012549077.2| collagen alpha-2(I) chain [Bombyx mori]
113		BGIBMGA000884	209.723	78.1978	1.4233	7.6423e-11	6.0205e-09	TRUE	1e-94	ref|XP_037870846.1| lipopolysaccharide-induced tumor necrosis factor-alpha factor homolog isoform X1 [Bombyx mori]
114		BGIBMGA001325	34.9058	82.7851	-1.2459	6.8733e-08	4.1684e-06	TRUE	1e-148	ref|NP_001036945.1| juvenile hormone binding protein an-0128 precursor [Bombyx mori]
115		BGIBMGA001452	54.4224	8.91312	2.6102	5.5129e-08	3.3973e-06	TRUE	1e-129	ref|XP_012548820.1| flocculation protein FLO11 isoform X2 [Bombyx mori]
116		BGIBMGA001713	214.906	104.747	1.0368	2.3717e-06	0.00011884	TRUE	0	ref|XP_037870105.1| protein toll isoform X3 [Bombyx mori]
117		BGIBMGA001899	333.029	110.451	1.5922	8.0081e-20	1.0642e-17	TRUE	0	ref|XP_012552045.1| uncharacterized protein LOC101743429 [Bombyx mori]
118		BGIBMGA002168	233.143	96.2855	1.2758	7.6301e-10	5.5266e-08	TRUE	0	ref|XP_004924462.1| ichor [Bombyx mori]
119		BGIBMGA002561	13.3097	68.429	-2.3621	1.7491e-12	1.5724e-10	TRUE	/	No hits
120		BGIBMGA002562	28.0271	167.115	-2.5759	1.4777e-30	2.8587e-28	TRUE	3e-43	ref|XP_037867253.1| spidroin-1 isoform X2 [Bombyx mori]
121		BGIBMGA002566	21.1163	47.0613	-1.1562	0.00010293	0.0036329	TRUE	9e-17	ref|XP_037867173.1| glycine-rich cell wall structural protein [Bombyx mori]
122		BGIBMGA002567	35.4178	127.256	-1.8452	3.1763e-17	3.6775e-15	TRUE	/	No hits
123		BGIBMGA002624	394.586	78.3166	2.333	8.1707e-42	2.0471e-39	TRUE	0	ref|KAI8438262.1| hypothetical protein MSG28_010859 [Choristoneura fumiferana]
124		BGIBMGA002668	155.557	20.7973	2.903	9.5222e-23	1.386e-20	TRUE	4e-114	ref|XP_004932345.1| uncharacterized protein LOC101736422 [Bombyx mori]
125		BGIBMGA002696	28.475	58.7791	-1.0456	4.5642e-05	0.0017223	TRUE	0	ref|XP_037866855.1| adhesive plaque matrix protein isoform X2 [Bombyx mori]
126		BGIBMGA003122	149.958	45.8253	1.7103	7.0774e-11	5.6043e-09	TRUE	0	ref|XP_012550007.2| leucine-rich repeat and fibronectin type III domain-containing protein 1-like protein [Bombyx mori]
127		BGIBMGA003274	129.481	33.6322	1.9448	1.4603e-11	1.2196e-09	TRUE	4e-127	ref|XP_037873326.1| uncharacterized protein LOC101741103 [Bombyx mori]
128		BGIBMGA003481	84.6251	242.009	-1.5159	2.8013e-25	4.6535e-23	TRUE	0	ref|NP_001036961.1| wing disc-specific protein [Bombyx mori]
129		BGIBMGA003510	271.024	73.3015	1.8865	1.6054e-21	2.2305e-19	TRUE	0	ref|XP_012549213.2| uncharacterized protein LOC101739696 [Bombyx mori]
130		BGIBMGA003773	100.046	8.08123	3.63	9.1918e-19	1.1329e-16	TRUE	8e-97	ref|CAH0726225.1| unnamed protein product [Brenthis ino]
131		BGIBMGA004035	384.156	785.234	-1.0314	2.0219e-49	6.059e-47	TRUE	1e-78	ref|NP_001037066.1| chemosensory protein precursor [Bombyx mori]
132		BGIBMGA004040	37.7533	217.504	-2.5264	1.3947e-38	3.2296e-36	TRUE	2e-88	ref|NP_001037067.1| chemosensory protein 8 precursor [Bombyx mori]
133		BGIBMGA004045	66.0364	165.713	-1.3274	2.113e-15	2.1819e-13	TRUE	7e-87	ref|NP_001037052.1| chemosensory protein 4 precursor [Bombyx mori]
134		BGIBMGA004063	0	16.2813	-7.9912	4.3176e-05	0.0016333	TRUE	0	ref|XP_028032517.1| uncharacterized protein LOC114244806 [Bombyx mandarina]
135		BGIBMGA004073	16.5091	80.7172	-2.2896	4.6267e-14	4.4193e-12	TRUE	/	No hits
136		BGIBMGA004378	108.461	26.9533	2.0086	2.2692e-10	1.7e-08	TRUE	0	ref|XP_004922581.2| retinaldehyde-binding protein 1 isoform X1 [Bombyx mori]
137		BGIBMGA004397	28.6989	81.4303	-1.5046	1.988e-09	1.381e-07	TRUE	0	ref|NP_001266309.1| low molecular mass 30 kDa lipoprotein 19G1-like precursor [Bombyx mori]
138		BGIBMGA004398	24.4117	52.1952	-1.0963	7.5894e-05	0.0027356	TRUE	1e-178	ref|NP_001266375.1| low molecular 30 kDa lipoprotein PBMHPC-19-like precursor [Bombyx mori]
139		BGIBMGA004613	174.369	56.8538	1.6168	2.2895e-11	1.8913e-09	TRUE	1e-174	ref|XP_026180192.1| heat shock 70 kDa protein 1-like [Mastacembelus armatus]
140		BGIBMGA004614	210.971	63.5089	1.732	5.3689e-15	5.434e-13	TRUE	0	ref|OWR50327.1| HSP70 protein [Danaus plexippus plexippus]
141		BGIBMGA004906	503.719	203.338	1.3087	1.6647e-20	2.2514e-18	TRUE	0	ref|CAH4036867.1| unnamed protein product [Pieris brassicae]
142		BGIBMGA005119	266.545	96.3568	1.4679	4.1134e-14	3.9788e-12	TRUE	0	ref|XP_012545066.1| balbiani ring protein 3 isoform X2 [Bombyx mori]
143		BGIBMGA005823	258.034	67.3594	1.9376	2.0412e-21	2.8104e-19	TRUE	1e-114	ref|NP_001276564.1| alpha-crystallin B chain-like precursor [Bombyx mori]
144		BGIBMGA006288	737.534	178.405	2.0476	2.7417e-63	9.9766e-61	TRUE	0	ref|XP_012553311.1| uncharacterized protein LOC101739351 [Bombyx mori]
145		BGIBMGA006315	131.305	61.0133	1.1057	7.3439e-05	0.0026659	TRUE	0	ref|XP_004923549.1| uncharacterized protein LOC101740768 [Bombyx mori]
146		BGIBMGA006730	3698.71	1159.09	1.674	6.3426e-222	6.0584e-219	TRUE	1e-79	ref|XP_004930398.1| uncharacterized protein LOC101746207 [Bombyx mori]
147		BGIBMGA006731	1789.35	465.051	1.944	4.8437e-139	2.6438e-136	TRUE	1e-83	ref|XP_004930399.1| uncharacterized protein LOC101746349 [Bombyx mori]
148		BGIBMGA006742	109.837	37.0786	1.5667	2.5194e-07	1.4052e-05	TRUE	5e-95	ref|XP_028038519.1| troponin C-like [Bombyx mandarina]
149		BGIBMGA007040	37.0175	7.10673	2.3809	2.5564e-05	0.001007	TRUE	1e-82	ref|XP_004932476.1| uncharacterized protein LOC101738364 [Bombyx mori]
150		BGIBMGA007250	7.42269	37.5539	-2.339	1.9979e-07	1.1351e-05	TRUE	0	ref|XP_037872693.1| mucin-22 [Bombyx mori]
151		BGIBMGA007388	46.4878	152.521	-1.7141	7.8986e-19	9.8142e-17	TRUE	0	ref|XP_012543959.1| Ig-like and fibronectin type-III domain-containing protein 1 isoform X1 [Bombyx mori]
152		BGIBMGA007827	152.517	65.9809	1.2089	2.5422e-06	0.00012614	TRUE	3e-23	ref|KAF9795210.1| hypothetical protein SFRURICE_004582 [Spodoptera frugiperda]
153		BGIBMGA007828	417.366	177.906	1.2302	2.2313e-15	2.2887e-13	TRUE	1e-151	ref|XP_004928543.1| uncharacterized protein LOC101740597 [Bombyx mori]
154		BGIBMGA007829	853.418	359.306	1.248	1.1866e-30	2.325e-28	TRUE	0	ref|XP_004928543.1| uncharacterized protein LOC101740597 [Bombyx mori]
155		BGIBMGA008091	138.152	60.1101	1.2006	8.778e-06	0.00038773	TRUE	3e-178	ref|XP_004925664.1| uncharacterized protein LOC101736398 [Bombyx mori]
156		BGIBMGA008346	782.806	189.933	2.0432	7.6618e-67	3.0024e-64	TRUE	1e-146	ref|XP_004928246.1| PREDICTED: uncharacterized protein LOC101745570 isoform X1 [Bombyx mori]
157		BGIBMGA008575	1023.15	510.282	1.0036	3.3788e-23	5.0626e-21	TRUE	0	ref|XP_037873351.1| uncharacterized protein LOC101738605 [Bombyx mori]
158		BGIBMGA008841	171.298	47.5129	1.8501	9.1436e-14	8.5731e-12	TRUE	0	ref|NP_001243947.1| spatzle-like protein [Bombyx mori]
159		BGIBMGA009108	0	19.6326	-8.2612	9.5948e-06	0.00042017	TRUE	3e-10	emb|CAG4956167.1| unnamed protein product [Parnassius apollo]
160		BGIBMGA010029	4.70317	29.5203	-2.65	9.963e-07	5.2687e-05	TRUE	0	ref|XP_004923319.2| mucin-5AC [Bombyx mori]
161		BGIBMGA010716	56.982	13.9758	2.0276	3.6382e-06	0.00017764	TRUE	0	ref|NP_001129362.1| osiris 19 precursor [Bombyx mori]
162		BGIBMGA010779	927.069	434.532	1.0932	2.3252e-25	3.9485e-23	TRUE	0	ref|XP_012551662.2| protein Skeletor, isoforms D/E isoform X1 [Bombyx mori]
163		BGIBMGA011094	514.341	224.468	1.1962	1.2819e-17	1.5187e-15	TRUE	0	ref|XP_004921750.1| proline-rich extensin-like protein EPR1 [Bombyx mori]
164		BGIBMGA011298	222.777	110.309	1.0141	2.8186e-06	0.00013941	TRUE	0	ref|XP_004930684.1| uncharacterized protein LOC101740799 [Bombyx mori]
165		BGIBMGA011399	237.078	80.7647	1.5536	5.6014e-14	5.3172e-12	TRUE	2e-51	ref|XP_004930780.1| uncharacterized protein LOC101741978 [Bombyx mori]
166		BGIBMGA011666	67.6361	20.417	1.728	9.9824e-06	0.00043465	TRUE	0	ref|XP_037870070.1| uncharacterized protein LOC105842372 isoform X5 [Bombyx mori]
167		BGIBMGA011901	21.1803	0	7.4775	7.857e-06	0.00035317	TRUE	0	ref|NP_001166287.1| sericin 2 isoform 1 precursor [Bombyx mori]
168		BGIBMGA011904	247.06	29.544	3.0639	2.664e-37	5.9874e-35	TRUE	0	ref|XP_037869958.1|extensin-2 isoform X2 [Bombyx mori]
169		BGIBMGA012419	5.15109	27.7614	-2.4301	5.2321e-06	0.00024528	TRUE	2e-129	ref|XP_021203323.1| uncharacterized protein LOC110385097 [Bombyx mori]
170		BGIBMGA012957	69.7157	24.8854	1.4862	9.2128e-05	0.0032897	TRUE	9e-77	ref|CAH2093933.1| unnamed protein product [Euphydryas editha]
171		BGIBMGA012958	241.269	85.2332	1.5012	2.0695e-13	1.9169e-11	TRUE	3e-127	ref|XP_028035292.1| uncharacterized protein LOC114246796 isoform X1 [Bombyx mandarina]
172		BGIBMGA012968	405.401	156.396	1.3741	2.2789e-18	2.7642e-16	TRUE	0	ref|XP_028035271.1| neurogenic locus notch homolog protein 1 [Bombyx mandarina]
173		BGIBMGA013017	109.293	46.5621	1.231	4.9268e-05	0.001841	TRUE	0	ref|NP_001040355.1| cellular retinaldehyde-binding protein [Bombyx mori]
174		BGIBMGA013026	61.9731	12.2407	2.34	7.4406e-08	4.4947e-06	TRUE	0	ref|XP_012548192.1| uncharacterized protein LOC105842064 isoform X2 [Bombyx mori]
175		BGIBMGA013041	109.709	48.2497	1.1851	9.3425e-05	0.0033205	TRUE	5e-47	ref|XP_004928949.1| somatomedin-B and thrombospondin type-1 domain-containing protein [Bombyx mori]
176		BGIBMGA013042	489.322	217.789	1.1679	4.5038e-16	4.8134e-14	TRUE	8e-93	ref|XP_004928949.1| somatomedin-B and thrombospondin type-1 domain-containing protein [Bombyx mori]
177		BGIBMGA013078	13.2137	58.6127	-2.1492	4.9279e-10	3.6383e-08	TRUE	1e-119	ref|XP_021205411.1| uncharacterized protein LOC101739604 isoform X2 [Bombyx mori]
178		BGIBMGA013376	434.899	124.261	1.8073	2.47e-31	5.0333e-29	TRUE	0	ref|XP_037876760.1|uncharacterized protein LOC101743303 isoform X1 [Bombyx mori]
179		BGIBMGA013377	78.9941	19.2523	2.0367	4.4481e-08	2.7747e-06	TRUE	6e-131	ref|XP_037876763.1| uncharacterized protein LOC101743303 isoform X4 [Bombyx mori]
180		BGIBMGA013448	1256.77	530.295	1.2449	4.0823e-44	1.0757e-41	TRUE	0	ref|NP_001040421.1| SPARC precursor [Bombyx mori]
181		BGIBMGA013655	705.636	220.071	1.681	4.2129e-44	1.0913e-41	TRUE	0	ref|XP_004927378.1| agrin [Bombyx mori]
182		BGIBMGA013881	103.982	36.936	1.4932	1.6091e-06	8.2247e-05	TRUE	2e-128	ref|XP_028035368.1| uncharacterized protein LOC114246851 [Bombyx mandarina]
183		BGIBMGA013949	142.663	14.8077	3.2682	1.0108e-23	1.5604e-21	TRUE	0	ref|XP_004933585.1| PREDICTED: flocculation protein FLO11-like [Bombyx mori]
184		BGIBMGA014039	3559.4	1639.97	1.118	3.5713e-97	1.7057e-94	TRUE	0	ref|XP_037877659.1| collagen, type IV isoform X1 [Bombyx mori]
185		BGIBMGA014040	2639.28	1247.91	1.0806	2.216e-67	8.9122e-65	TRUE	0	ref|XP_028043402.1| collagen alpha-2(IV) chain [Bombyx mandarina]
186		BGIBMGA014559	67.796	18.6819	1.8596	2.4961e-06	0.00012426	TRUE	0	ref|XP_037867691.1| protein PFC0760c [Bombyx mori]
187		BGIBMGA014618	116.555	32.6577	1.8355	1.0166e-09	7.2943e-08	TRUE	1e-173	ref|XP_015193124.1| PREDICTED: heat shock cognate 70 kDa protein [Lepisosteus oculatus]
188		Novel00049	793.524	2131.66	-1.4256	2.6543e-194	2.135e-191	TRUE	1.6	ref|XP_010237988.1|PREDICTED: nucleoporin nup189-like [Brachypodium distachyon]
189		Novel01771	595.031	168.85	1.8172	1.2731e-42	3.2428e-40	TRUE	0	ref|XP_004929514.1|glucose dehydrogenase [FAD, quinone] [Bombyx mori]
190		Novel01918	8.4785	33.0617	-1.9633	8.5091e-06	0.00037914	TRUE	/	No hits
191		Novel02144	139.687	39.1702	1.8344	2.359e-11	1.9383e-09	TRUE	0.0001	gi|238623776|dbj|BAH66362.1|olfactory receptor [Bombyx mori]
