# Supplementary material for: The BTB-ZF gene Bm-mamo regulates pigmentation in silkworm caterpillars
Source: eLife. 2024 Apr 8;12:RP90795. doi: 10.7554/eLife.90795 (PMC11001300; doi:10.7554/eLife.90795)
Supplement: Supplementary file 6. [file elife-90795-supp6.xlsx]

## Sheet: Sheet1
Supplementary Table S6. The ortholog of 19 cuticular protein genes.
Name	Family	Gene in SilkDB	Gene in Silkbase	Gene in D.melanogaster	Gene in Danaus plexippus	Accession number of Papilio xuthus
BmorCPR2	RR-1	BGIBMGA005277	KWMTBOMO12562	Cuticular protein 67Fb	DPOGS204934	NP_001299352.1
BmorCPR3	RR-1	BGIBMGA005278	KWMTBOMO04385	Cuticular protein 65Ec	DPOGS204935	NP_001299389.1
BmorCPR4	RR-1	BGIBMGA002548	KWMTBOMO05376	Cuticular protein 65Av	DPOGS210226	NP_001299425.1
BmorCPR5	RR-1	BGIBMGA002549	KWMTBOMO05377	Cuticular protein 65Av	DPOGS21022	NP_001299125.1
BmorCPR11	RR-1	BGIBMGA012601	KWMTBOMO11214	Cuticular protein 65Eb	DPOGS209413	XP_013163146.1
BmorCPR28	RR-1	BGIBMGA000341	KWMTBOMO13158	Adult cuticle protein 65Aa	DPOGS207987	NP_001299546.1
BmorCPR38	RR-1	BGIBMGA000333	KWMTBOMO13146	Cuticular protein 67Fb	DPOGS207981	NP_001299095.1
BmorCPR41	RR-1	BGIBMGA000329	KWMTBOMO13141	Cuticular protein 49Ab	DPOGS207978	NP_001299345.1
BmorCPR42	RR-1	BGIBMGA000328	KWMTBOMO13140	Cuticular protein 67Fb	DPOGS207976	NP_001299352.1
BmorCPR44	RR-1	BGIBMGA000326	KWMTBOMO13138	Cuticular protein 49Aa	DPOGS207976	KPI97901.1
BmorCPR46	RR-1	BGIBMGA000324	KWMTBOMO13135	Cuticular protein 11B	DPOGS207973	NP_001298836.1
BmorCPH19	CPH	BGIBMGA011761	KWMTBOMO06685		DPOGS204868	NP_001298992.1
BmorCPH24	CPH	BGIBMGA011765	KWMTBOMO06675
BmorCPH25	CPH	BGIBMGA011766	KWMTBOMO06674
BmorCPT2	CPT	BGIBMGA000520	KWMTBOMO00354	TweedleE	DPOGS206032	KPI91969.1
BmorCPT3	CPT	BGIBMGA005259	KWMTBOMO04356	TweedleE	DPOGS206331	KPI91969.1
BmorCPG4	CPG	BGIBMGA008255	KWMTBOMO10672	CG32564		BAG30773.1
BmorCPG13	CPG	BGIBMGA002384	KWMTBOMO05344	Vajk4	DPOGS210253	KPJ05455.1
BmorCPFL1	CPFL	Novel01073	KWMTBOMO00895
