# Supplementary material for: The BTB-ZF gene Bm-mamo regulates pigmentation in silkworm caterpillars
Source: eLife. 2024 Apr 8;12:RP90795. doi: 10.7554/eLife.90795 (PMC11001300; doi:10.7554/eLife.90795)
Supplement: Supplementary file 7. — Futahashi R, et al. Comprehensive microarray-based analysis for stage-specific larval camouflage pattern-associated genes in the swallowtail butterfly, Papilio xuthus. BMC Biol. 2012;10:46. Published 2012 May 31. doi:10.1186/1741-7007-10-46 [file elife-90795-supp7.xlsx]

## Sheet: Sheet1
Supplementary Table S7. The genes encoding cuticular proteins with high expression in the black epidermal region of papilio xuthus caterpillars
Name of Bombyx mori	Family	Gene number in SilkDB	Name of Papilio xuthu	Accession number of Papilio xuthus	Gene in Danaus plexippus	Gene in Drosophila melanogaster
BmorCPR67	RR-2	BGIBMGA010145	PxutCPR67Bc	AB264688	DPGLEAN07212	Ccp84Ad
BmorCPR71	RR-2	BGIBMGA010142	PxutCPR71	AB264671	DPGLEAN07212	Ccp84Ad
BmorCPR76	RR-2	BGIBMGA001486	PxutCPR76b	AK401331	DPGLEAN07395	Ccp84Ad
BmorCPR79	RR-2	BGIBMGA000285	PxutCPR79	AK401617	DPGLEAN16380	Cuticular protein 76Bd
BmorCPR99	RR-2	BGIBMGA000265	PxutCPR97Bb	AK401509	DPGLEAN08085	CG34461
BmorCPR107	RR-2	BGIBMGA000259	PxutCPR107	AK401841	DPGLEAN16484	Cuticular protein 62Bc
BmorCPR129	RR-2	BGIBMGA000246	PxutCPR129	AK401839	DPGLEAN07718	CG34461
BmorCPG4	CPG	BGIBMGA008255	PxutCPG4	AB264698	DPGLEAN07899	CG1368
BmorCPG27	CPG	BGIBMGA008213	PxutCPG3	AB264657	DPGLEAN07900	CG15597
BmorCPG38	CPG	BGIBMGA008396	PxutCPG38	AK403802	DPGLEAN10638	CG16885
BmorCPT4	CPT	BGIBMGA006826	PxutCPT4	AK401206	DPGLEAN11147	TweedleE
BmorCPFL4	CPFL	BGIBMGA011455	PxutCPFL6Ba	AK402093	DPGLEAN19242	CG32603
BmorCPH5	CPH	BGIBMGA005397	PxutCPH5	AK401958	DPGLEAN19902
Futahashi R,et al. Comprehensive microarray-based analysis for stage-specific larval camouflage pattern-associated genes in the swallowtail butterfly, Papilio xuthus. BMC Biol. 2012;10:46. Published 2012 May 31. doi:10.1186/1741-7007-10-46
