# Supplementary material for: The BTB-ZF gene Bm-mamo regulates pigmentation in silkworm caterpillars
Source: eLife. 2024 Apr 8;12:RP90795. doi: 10.7554/eLife.90795 (PMC11001300; doi:10.7554/eLife.90795)
Supplement: Supplementary file 8. — Brown JB, Boley N, Eisman R, et al. Diversity and dynamics of the Drosophila transcriptome. Nature. 2014;512(7515):393–399. doi:10.1038/nature12962 [file elife-90795-supp8.xlsx]

## Sheet: Sheet1
Supplementary Table S8. The temporal expression of mamo gene in Drosophila melannogaster
Library Collection ID	Parent Library Name	Gene Symbol	FBgn ID	Category ID	Category Descriptive Name	RPKM Expression Value	Expression Value BinID
FBlc0000086	modENCODE_mRNA-Seq_development	mamo	FBgn0267033	40	mE_mRNA_em0-2hr	0	1
FBlc0000087	modENCODE_mRNA-Seq_development	mamo	FBgn0267033	170	mE_mRNA_em2-4hr	0	1
FBlc0000088	modENCODE_mRNA-Seq_development	mamo	FBgn0267033	280	mE_mRNA_em4-6hr	0	1
FBlc0000089	modENCODE_mRNA-Seq_development	mamo	FBgn0267033	310	mE_mRNA_em6-8hr	0	1
FBlc0000090	modENCODE_mRNA-Seq_development	mamo	FBgn0267033	320	mE_mRNA_em8-10hr	0	1
FBlc0000091	modENCODE_mRNA-Seq_development	mamo	FBgn0267033	340	mE_mRNA_em10-12hr	0	1
FBlc0000092	modENCODE_mRNA-Seq_development	mamo	FBgn0267033	360	mE_mRNA_em12-14hr	0	1
FBlc0000093	modENCODE_mRNA-Seq_development	mamo	FBgn0267033	380	mE_mRNA_em14-16hr	0	1
FBlc0000094	modENCODE_mRNA-Seq_development	mamo	FBgn0267033	391	mE_mRNA_em16-18hr	0	1
FBlc0000095	modENCODE_mRNA-Seq_development	mamo	FBgn0267033	392	mE_mRNA_em18-20hr	0	1
FBlc0000096	modENCODE_mRNA-Seq_development	mamo	FBgn0267033	393	mE_mRNA_em20-22hr	0	1
FBlc0000097	modENCODE_mRNA-Seq_development	mamo	FBgn0267033	394	mE_mRNA_em22-24hr	0	1
FBlc0000098	modENCODE_mRNA-Seq_development	mamo	FBgn0267033	410	mE_mRNA_L1	0	1
FBlc0000099	modENCODE_mRNA-Seq_development	mamo	FBgn0267033	420	mE_mRNA_L2	0	1
FBlc0000100	modENCODE_mRNA-Seq_development	mamo	FBgn0267033	440	mE_mRNA_L3_12hr	2	2
FBlc0000101	modENCODE_mRNA-Seq_development	mamo	FBgn0267033	462	mE_mRNA_L3_PS1-2	1	2
FBlc0000102	modENCODE_mRNA-Seq_development	mamo	FBgn0267033	465	mE_mRNA_L3_PS3-6	1	2
FBlc0000103	modENCODE_mRNA-Seq_development	mamo	FBgn0267033	467	mE_mRNA_L3_PS7-9	2	2
FBlc0000104	modENCODE_mRNA-Seq_development	mamo	FBgn0267033	510	mE_mRNA_WPP	2	2
FBlc0000105	modENCODE_mRNA-Seq_development	mamo	FBgn0267033	580	mE_mRNA_P5	2	2
FBlc0000106	modENCODE_mRNA-Seq_development	mamo	FBgn0267033	610	mE_mRNA_P6	3	2
FBlc0000107	modENCODE_mRNA-Seq_development	mamo	FBgn0267033	630	mE_mRNA_P8	3	2
FBlc0000108	modENCODE_mRNA-Seq_development	mamo	FBgn0267033	640	mE_mRNA_P9-10	1	2
FBlc0000109	modENCODE_mRNA-Seq_development	mamo	FBgn0267033	740	mE_mRNA_P15	4	3
FBlc0000113	modENCODE_mRNA-Seq_development	mamo	FBgn0267033	810	mE_mRNA_AdM_Ecl_1days	4	3
FBlc0000114	modENCODE_mRNA-Seq_development	mamo	FBgn0267033	850	mE_mRNA_AdM_Ecl_5days	4	3
FBlc0000115	modENCODE_mRNA-Seq_development	mamo	FBgn0267033	1100	mE_mRNA_AdM_Ecl_30days	4	3
FBlc0000110	modENCODE_mRNA-Seq_development	mamo	FBgn0267033	810	mE_mRNA_AdF_Ecl_1days	4	3
FBlc0000111	modENCODE_mRNA-Seq_development	mamo	FBgn0267033	850	mE_mRNA_AdF_Ecl_5days	2	2
FBlc0000112	modENCODE_mRNA-Seq_development	mamo	FBgn0267033	1100	mE_mRNA_AdF_Ecl_30days	2	2
Brown JB, Boley N, Eisman R, et al. Diversity and dynamics of the Drosophila transcriptome. Nature. 2014;512(7515):393-399. doi:10.1038/nature12962
