# Supplementary material for: The BTB-ZF gene Bm-mamo regulates pigmentation in silkworm caterpillars
Source: eLife. 2024 Apr 8;12:RP90795. doi: 10.7554/eLife.90795 (PMC11001300; doi:10.7554/eLife.90795)
Supplement: Supplementary file 9. — p indicates that the larva has a pale body color and has no markings. p3 indicates that the larva has a pale body color and has eye spots, lunar spots, and star spots. The hyphen indicates not available. The wild indicates the wild silkworm (Bombyx mandarina). ‘Local’ indicates domesticated strains. [file elife-90795-supp9.xlsx]

## Sheet: Sheet1
Supplementary Table S9. Information on the silkworm strains
Number	Sample Id	Name	Phenotype	Group	Location
1	BomW3			Wild	Shaanxi, China
2	BomW15			Wild	Shaanxi, China
3	BomW16			Wild	Shaanxi, China
4	BomW17			Wild	Shaanxi, China
5	BomW37			Wild	Beijing, China
6	BomW40			Wild	Hebei, China
7	BomW43			Wild	Anhui, China
8	BomW45			Wild	Zhejiang, China
9	BomW46			Wild	Shanghai, China
10	BomW47			Wild	Shanghai, China
11	BomW49			Wild	Jiangsu, China
12	BomW51			Wild	Jiangsu, China
13	BomL10	Tu No.1	p3	Local	Shanxi, China
14	BomL100	Xupu	p3	Local	Hunan, China
15	BomL193	C108N	p	Local	China
16	Dazao	Dazao	p3	Local	China
17	BomL112	N4	p	Local	India
18	BomL113	Huangban	-	Local	Guangdong, China
19	BomL122	Lao	p	Local	Laos
20	BomL123	Fang 4	p	Local	Guangxi, China
21	BomL125	H2-2	p3	Local	Vietnam
22	BomL138	Gaohua	p3	Local	Guangdong, China
23	BomL165	Cambodia	p	Local	Cambodia
24	BomL211	5G	-	Local	unknown
p indicates that the larva has a pale body color and has no markings. p3 indicates that the larva has a pale body color and has eye spots, lunar spots, and star spots. The hyphen indicates not available. The wild indicates the wild silkworm (Bombyx mandarina). “Local” indicates domesticated strains.
