# Supplementary material for: The BTB-ZF gene Bm-mamo regulates pigmentation in silkworm caterpillars
Source: eLife. 2024 Apr 8;12:RP90795. doi: 10.7554/eLife.90795 (PMC11001300; doi:10.7554/eLife.90795)
Supplement: Supplementary file 10. [file elife-90795-supp10.xlsx]

## Sheet: Primers
Supplementary Table S10. Primers for this research
Number	Name	F	R
1	BmorCPR2	CGCCCCAGTGGTCAAATC	CGATGGCGGGGTATTCTG
2	BmorCPR3	TTACATCTTCCTCGCTTTGGTC	CTGATTCCGTTGCTGGTCTG
3	BmorCPR4	TGTCGCTCTCTTCGTCGCC	CCTGAGCCTTGATTCCGTTG
4	BmorCPR5	GAGGGTTACGGCTTTGGCT	ACGTCGTCTCGTGGACCTTT
5	BmorCPR11	CGAAGCGAAACCCGAAAGA	GCCACGCCATTTTCTCCG
6	BmorCPR27	GCCAATCTGATGGGACCGT	GCCGGGACCTTGCTCTATTT
7	BmorCPR28	GTTATTAGCATTGTGTTTGGTGG	CCTGCTCAAATACGGTCCCA
8	BmorCPR38	ACTCCTACTCCGTTTCTGCCTATC	CGATACCGTTGTTGGTTTCGT
9	BmorCPR41	CTACGTCGGAACCAAGGAGG	TGATGCCGTATTTGTAGTCGTAGC
10	BmorCPR42	TCTTGGTTTTGGCTTTATGCG	GCTTCACTGCCGCTGACTACT
11	BmorCPR44	GTGTTGGTTTCTATGCTGGTCG	GGTATGACCCGTCGCCGTT
12	BmorCPR46	TCTCGCCCTTGTGGCTACC	ACGCACGATGCCGTTGGA
13	BmorCPR67	CACACCCTCAATACAGTTTCGC	CGTTGAAGCCGTTGTGGG
14	BmorCPR76	GTTCACGACGAGCAAAGCG	TAGCGTTAAATCCGTTTACTTTGT
15	BmorCPR79	TCATCAAGGACCTGTAGTATCGC	GGAATCTGTAGGGCGGGTAA
16	BmorCPR71	GGAATACGACGCTCATCCTCAG	GGGTCAACGACGGAGTAGGA
17	BmorCPR99	ACTTCTCCACTCCGCTACTCCT	ACAGGAGCGGCGTATTGG
18	BmorCPR107	CGTCGTGAAGGGCGTGTA	ACATGGCGAGCATGACCC
19	BmorCPH5	ACGAAGTCGGTGACGCTGAA	TACCGTCAGGAAGAAGCACTCG
20	BmorCPH19	GCCAGCAGGGCATTGAGTC	GGGAGAGTGTAGGGAGCCG
21	BmorCPH24	TCAGAGTCCTTGTCGCATTCG	GCGGTGTAGGCGTAGGTGG
22	BmorCPH25	CCCGCTCTCACCACCTCC	CTACGACGGGAGCGGTGA	Primers for qRT-PCR
23	BmorCPH34	CGCACCAAATCCACACACC	GGGCTGCGTAAGTTCGGG
24	BmorCPT2	TGAACCTCCAGTGGGATACAGC	GGAAATGCTGCCTCCAGAAAG
25	BmorCPT3	CACCCATCATCCCCGCTC	TGGGTGGGAGCAGCAGTG
26	BmorCPT4	GCCACCGCCAGATAACGA	CGGTCGGTGTTGGAGGTGT
27	BmorCPG4	CGCCAAGACAGAAGACAAGG	GCTGTAAGACGAGGGAGAGGA
28	BmorCPG13	CTACATCGGACACGGACAAGG	GTATGTCCACCGAAGTTGAGGC
29	BmorCPFL4	AGTCGGCTGTCACATATTCTGC	ACCGCTGAAGGAGATGTGAGAC
30	RPL3	CGGTGTTGTTGGATACATTGAG	GCTCATCCTGCCATTTCTTACT
31	yellow	TCGCTTACTCGTGGGAACAGA	ATAGGAGACGCCGTGATGCC
32	ddc	AGCCTTGGACTGCGGTGAT	ATAGCGGGATACGAGTTAGCG
33	ebony	GACGCCCAGGTCAAGATTCG	CGTAGCATAGCACCACGCACT
34	TH	TTGATGCCCAAACACGC	TCGCAGGGTAAAGCCAGT
35	black	GTGGGCGGATGTCCTCAAA	GCAAGCCTTCCCGATTACG
36	Laccase2	CATCTCCCAGCCATCCCACT	CGAACCATCATAAACTCCCGT
37	tan	CCACGGTTCTCGTCTTTATGCTA	AGGAGGAGTGTTTCCAGGCTTT
38	iAANAT	TGAATCTCGCCGTCAATCTG	GAAACTCCATCGCTCAAGGTAG
39	Bm-mamo	TGCCTAAAGATGAACCACCTGAC	TCTAGGGCTTGAAAGTGATGGAA
40	BGIBMGA012516	ACTCCTCTCAAAGTTAGCAGTC	GTTCATCTATGCTGTTGCTCTG
41	BGIBMGA012517	AATCTCGCGATCTTAGGGAAAT	TGGAATCTCTAACGTCTCGAAG
42	BGIBMGA012518	GTACTGACAGCAAAAACGAGAG	GCTCTGCCACAAAATAGACAAA
43	BGIBMGA012519	GTAATGTGATGCTGTTCGGTAC	GAATCGTCCCTGTTTCCAATTC
44	BGIBMGA014089	GCGACTGAACATGTACTCATTC	TACAACTTCTGTTTCACGCAAG
45	KWMTBOMO05082	CCATTGGTATGGTGGTTGTGC	TGGTGAGGGCCAATCATCAC
46	KWMTBOMO05084	AATACTTGCCGACGCTGGTG	CTCGTCAGGCTTGTGAGGTTTT
47	KWMTBOMO05085	CTGGCGGTGTCTCTTGACAT	AAATAGGACCCAACCAGCCG
48	a	CAGGAACAGGGATGTGGACTTG	TTGCTATCGGAGCTCTGGGA
49	b	GGAGGGCTCGCTAAGTCG	GCTCATTGGGCACGGTC
50	c	AATGTGAATCTCGGAAACGG	CATTTAAGCCTTTAGGGATTGG
51	d	GCTCTATTTATTTCCCAACTTCCAC	TTACTTTCGCTGTCATATCACCA
52	e	GGCAGAAATAGGCAGGGTG	CTGCTTTATCTGGTGGTGGG
53	f	ATAGTTTTTCGCATTAGGGTCAT	AGTCAGATAGTTGGGCTTTCTTAAT
54	g	GCCGTAGCCTAAATGATAAGACC	TGTTCATCACAAGCCGTAGGA	Primers for mapping
55	h	AGTGTAGTTTGAAGGGTAGGG	AACCGATCCTACTCTTCTGC
56	i	GCGTATTTAGTCGTCCGTGAC	ACCGCTAATACCCGTAGACACT
57	j	CTTTCCTCACTTTACTCCTCCAC	CTTTTTCCGCTTTCTTCCTTT
58	k	CATGCTTACTTTTCTGCGATCT	TTGTGGCCCAACTTTTGTAGTA
59	l	GAGTACAATGCCAGTAGCCAAGT	GCATAAGCCATCTAATCCCTATT
60	m	GCAATAGGTGTTCCCGAAAGAG	GAAAGTGATTGATGCCTGGTGT
61	BGIBMGA00012517	ATGGGAAGTGAGCACTATTGC	TCATTGATGTGGACTCTCCTCTT	Primers for cloning
62	BGIBMGA00012517/18	ATGGGAAGTGAGCACTATTGC	TCATCGAGTGTTATGTACGTGTG
63	bd-genome-cloning	TGTCAGTTGAAAGTAATCGTAGC	AGTTTTCTAAAAATATAGTATGGCG

## Sheet: Sheet1
BmorCPR2	CGCCCCAGTGGTCAAATC	CGATGGCGGGGTATTCTG
BmorCPR3	TTACATCTTCCTCGCTTTGGTC	CTGATTCCGTTGCTGGTCTG
BmorCPR4	TGTCGCTCTCTTCGTCGCC	CCTGAGCCTTGATTCCGTTG
BmorCPR5	GAGGGTTACGGCTTTGGCT	ACGTCGTCTCGTGGACCTTT
BmorCPR11	CGAAGCGAAACCCGAAAGA	GCCACGCCATTTTCTCCG
BmorCPR27	GCCAATCTGATGGGACCGT	GCCGGGACCTTGCTCTATTT
BmorCPR28	GTTATTAGCATTGTGTTTGGTGG	CCTGCTCAAATACGGTCCCA
BmorCPR38	ACTCCTACTCCGTTTCTGCCTATC	CGATACCGTTGTTGGTTTCGT
BmorCPR41	CTACGTCGGAACCAAGGAGG	TGATGCCGTATTTGTAGTCGTAGC
BmorCPR42	TCTTGGTTTTGGCTTTATGCG	GCTTCACTGCCGCTGACTACT
BmorCPR44	GTGTTGGTTTCTATGCTGGTCG	GGTATGACCCGTCGCCGTT
BmorCPR46	TCTCGCCCTTGTGGCTACC	ACGCACGATGCCGTTGGA
BmorCPR67	CACACCCTCAATACAGTTTCGC	CGTTGAAGCCGTTGTGGG
BmorCPR76	GTTCACGACGAGCAAAGCG	TAGCGTTAAATCCGTTTACTTTGT
BmorCPR79	TCATCAAGGACCTGTAGTATCGC	GGAATCTGTAGGGCGGGTAA
BmorCPR71	GGAATACGACGCTCATCCTCAG	GGGTCAACGACGGAGTAGGA
BmorCPR99	ACTTCTCCACTCCGCTACTCCT	ACAGGAGCGGCGTATTGG
BmorCPR107	CGTCGTGAAGGGCGTGTA	ACATGGCGAGCATGACCC
BmorCPH5	ACGAAGTCGGTGACGCTGAA	TACCGTCAGGAAGAAGCACTCG
BmorCPH19	GCCAGCAGGGCATTGAGTC	GGGAGAGTGTAGGGAGCCG
BmorCPH24	TCAGAGTCCTTGTCGCATTCG	GCGGTGTAGGCGTAGGTGG
BmorCPH25	CCCGCTCTCACCACCTCC	CTACGACGGGAGCGGTGA
BmorCPH34	CGCACCAAATCCACACACC	GGGCTGCGTAAGTTCGGG
BmorCPT2	TGAACCTCCAGTGGGATACAGC	GGAAATGCTGCCTCCAGAAAG
BmorCPT3	CACCCATCATCCCCGCTC	TGGGTGGGAGCAGCAGTG
BmorCPT4	GCCACCGCCAGATAACGA	CGGTCGGTGTTGGAGGTGT
BmorCPG4	CGCCAAGACAGAAGACAAGG	GCTGTAAGACGAGGGAGAGGA
BmorCPG13	CTACATCGGACACGGACAAGG	GTATGTCCACCGAAGTTGAGGC
BmorCPFL4	AGTCGGCTGTCACATATTCTGC	ACCGCTGAAGGAGATGTGAGAC
RPL3	CGGTGTTGTTGGATACATTGAG	GCTCATCCTGCCATTTCTTACT
